# Supplementary material for: Disparate Effects of Two Clerodane Diterpenes of Giant Goldenrod (Solidago gigantea Ait.) on Bacillus spizizenii
Source: MDPI journal article supplement (doi:10.3390/ijms25031531), 2024-01-26
Supplement: s1 [file s1]

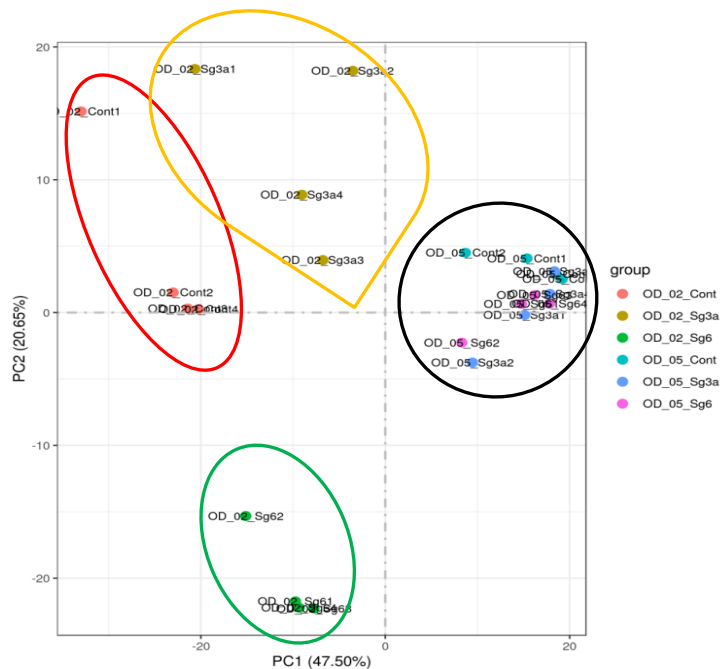

Figure S1. 2D principal component analysis of transcription results of samples obtained after diterpene (Sg3a and Sg6) treatments or in control (Cont) samples. *B. spizizenii* RNA was isolated from OD<sub>600</sub>=0.2 samples after 5 hours, while RNA was purified from OD<sub>600</sub>=0.5 samples after 1 hour incubation.
