# Supplementary material for: Disparate Effects of Two Clerodane Diterpenes of Giant Goldenrod (Solidago gigantea Ait.) on Bacillus spizizenii
Source: MDPI journal article supplement (doi:10.3390/ijms25031531), 2024-01-26
Supplement: s1 [file s1]

**Table S3.** KEGG pathways enrichment results of diterpene treatments.

|          | KEGG pathways                                       | Sg3a-5h         |    |      | Sg6-5h  |     |      | Sg3a-1h |    |      | Sg6-1h  |    |      |
|----------|-----------------------------------------------------|-----------------|----|------|---------|-----|------|---------|----|------|---------|----|------|
|          |                                                     | UP/DOWN         | UP | DOWN | UP/DOWN | UP  | DOWN | UP/DOWN | UP | DOWN | UP/DOWN | UP | DOWN |
| bst02010 | ABC transporters                                    | 35 <sup>a</sup> | 36 |      |         |     |      |         |    |      |         |    | 12   |
| bst02030 | Bacterial chemotaxis                                |                 |    | 20   | 2       | 21  | 21   |         |    | 9    |         |    | 5    |
| bst02040 | Flagellar assembly                                  | 2               | 28 |      | 1       | 37  | 37   |         |    | 12   |         |    |      |
| bst00552 | Teichoic acid biosynthesis                          |                 | 13 |      |         |     |      |         |    |      |         |    |      |
| bst00300 | Lysine biosynthesis                                 |                 | 9  |      |         |     |      |         |    |      |         |    |      |
| bst00230 | Purine metabolism                                   |                 |    |      | 10      | 34  | 34   |         |    |      |         |    |      |
| bst00240 | Pyrimidine metabolism                               |                 |    |      | 3       | 23  | 23   |         |    |      |         |    |      |
| bst00640 | Propanoate metabolism                               |                 |    |      | 9       | 15  |      |         |    |      |         |    |      |
| bst01120 | Microbial metabolism in diverse environments        |                 |    |      | 72      | 45  | 72   |         |    |      |         |    |      |
| bst01110 | Biosynthesis of secondary metabolites               |                 |    |      | 83      | 112 |      | 48      |    |      | 65      | 13 | 65   |
| bst00650 | Butanoate metabolism                                |                 |    |      | 13      | 6   | 13   |         |    |      |         |    |      |
| bst00190 | Oxidative phosphorylation                           |                 |    |      | 3       | 25  | 25   |         |    |      |         |    |      |
| bst03010 | Ribosome                                            |                 |    |      |         |     | 34   |         |    |      |         |    |      |
| bst01232 | Nucleotide metabolism                               |                 |    |      |         |     | 29   |         |    |      |         |    |      |
| bst00670 | One carbon pool by folate                           |                 |    |      |         |     | 9    |         |    |      |         |    |      |
| bst00500 | Starch and sucrose metabolism                       |                 |    |      |         | 23  |      |         |    |      |         |    |      |
| bst00920 | Sulfur metabolism                                   |                 |    |      |         | 11  |      |         |    |      |         |    |      |
| bst00562 | Inositol phosphate metabolism                       |                 |    |      |         | 9   |      |         |    |      |         |    |      |
| bst02060 | Phosphotransferase system (PTS)                     |                 |    |      |         | 15  |      |         |    |      |         |    |      |
| bst00520 | Amino sugar and nucleotide sugar metabolism         |                 |    |      |         | 16  |      |         |    |      |         |    |      |
| bst00071 | Fatty acid degradation                              |                 |    |      |         | 8   |      |         | 8  |      |         |    |      |
| bst04122 | Sulfur relay system                                 |                 |    |      |         |     |      |         | 7  |      |         |    |      |
| bst00740 | Riboflavin metabolism                               |                 |    |      |         |     |      |         | 6  |      |         |    |      |
| bst01240 | Biosynthesis of cofactors                           |                 |    |      |         |     |      |         | 29 |      |         |    |      |
| bst00130 | Ubiquinone and other terpenoid-quinone biosynthesis |                 |    |      |         |     |      |         | 6  |      | 7       | 1  | 7    |
| bst01230 | Biosynthesis of amino acids                         |                 |    |      |         |     |      |         |    |      | 32      | 5  | 32   |
| bst00220 | Arginine biosynthesis                               |                 |    |      |         | 10  |      |         |    |      |         |    | 8    |
| bst00340 | Histidine metabolism                                |                 |    |      |         |     |      |         |    |      | 6       | 1  | 6    |
| bst00380 | Tryptophan metabolism                               |                 |    |      |         |     |      |         |    |      |         |    | 6    |
| bst00290 | Valine, leucine and isoleucine biosynthesis         |                 |    |      |         |     |      |         |    |      |         |    | 9    |
| bst00280 | Valine, leucine and isoleucine degradation          |                 |    |      |         |     |      |         |    |      | 7       | 1  | 7    |
| bst00561 | Glycerolipid metabolism                             |                 |    |      |         |     |      |         |    |      | 4       | 4  | 4    |
| bst00630 | Glyoxylate and dicarboxylate metabolism             |                 |    |      |         |     |      |         |    |      | 10      | 1  | 10   |
| bst01210 | 2-Oxocarboxylic acid metabolism                     |                 |    |      |         | 14  |      |         |    |      |         |    | 15   |
| bst00010 | Glycolysis / Gluconeogenesis                        |                 |    |      |         |     |      |         |    |      |         | 10 |      |
| bst00400 | Phenylalanine, tyrosine and tryptophan biosynthesis |                 |    |      |         |     |      |         |    |      |         |    | 5    |

<sup>a</sup>The number of the genes up- or down-regulated in the significantly enriched pathways is marked in red and green, respectively.
