# Supplementary material for: Disparate Effects of Two Clerodane Diterpenes of Giant Goldenrod (Solidago gigantea Ait.) on Bacillus spizizenii
Source: MDPI journal article supplement (doi:10.3390/ijms25031531), 2024-01-26

Figure S2. ABC transporter gene activity changes of *B. spizizenii* after diterpene treatments.

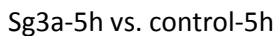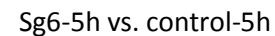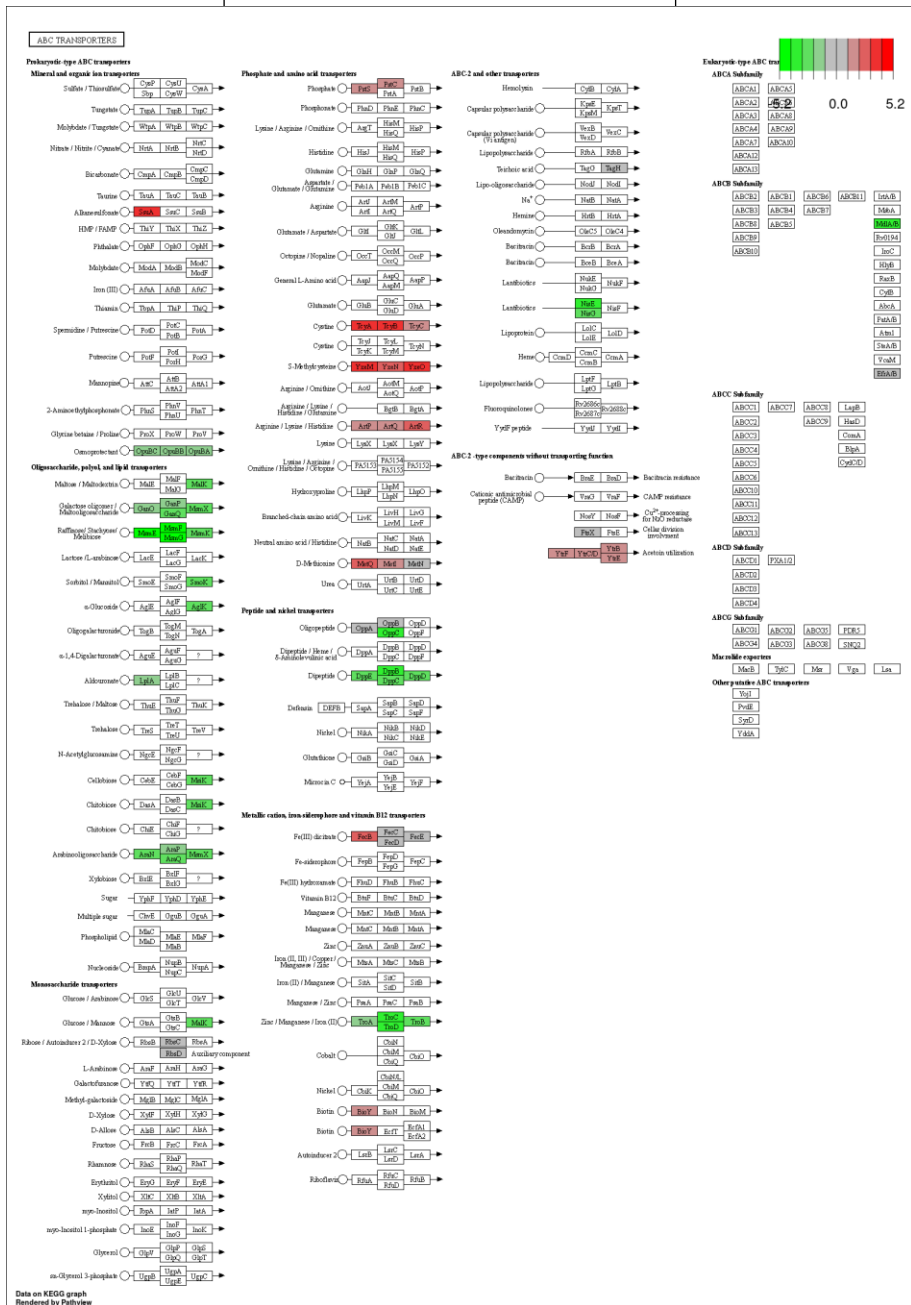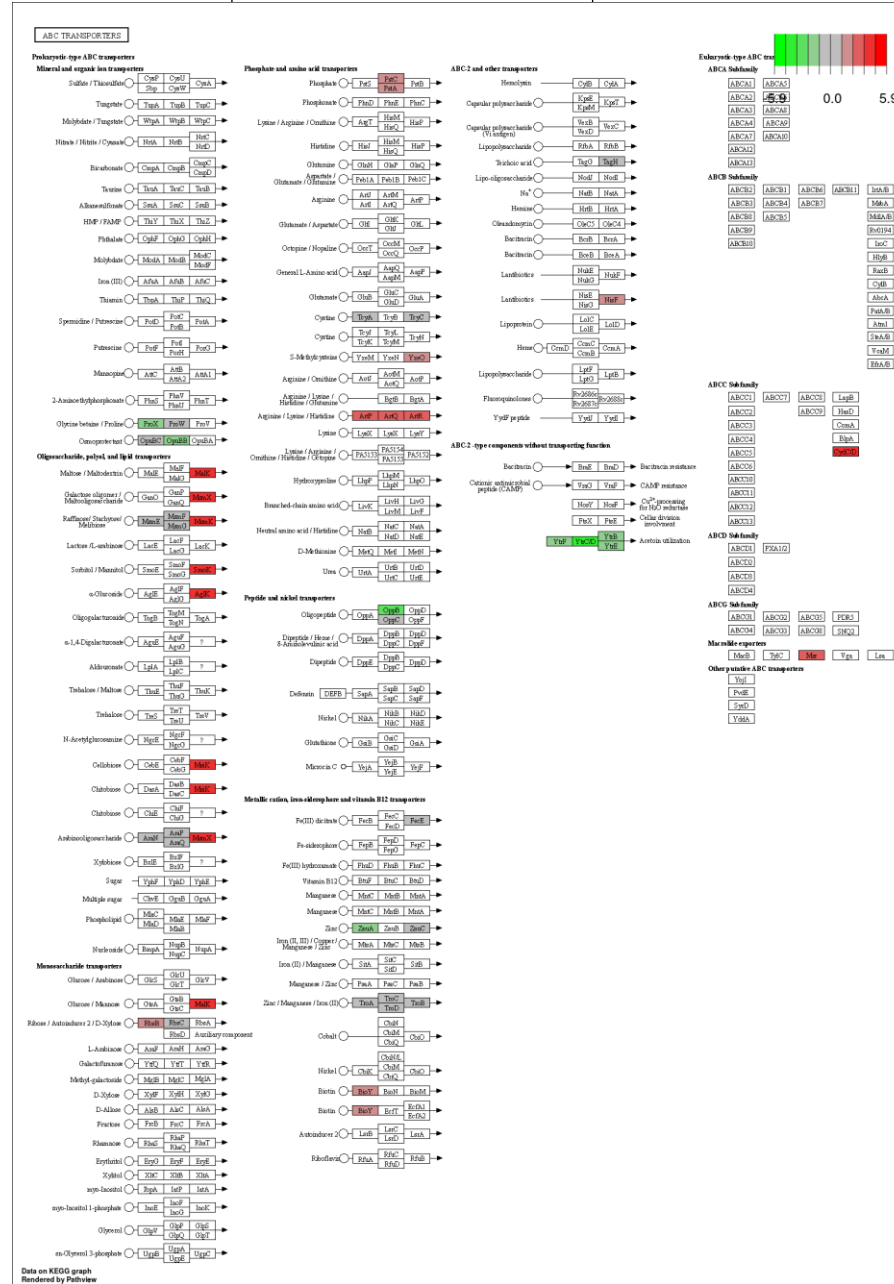

Sg3a-1h vs. control-1h

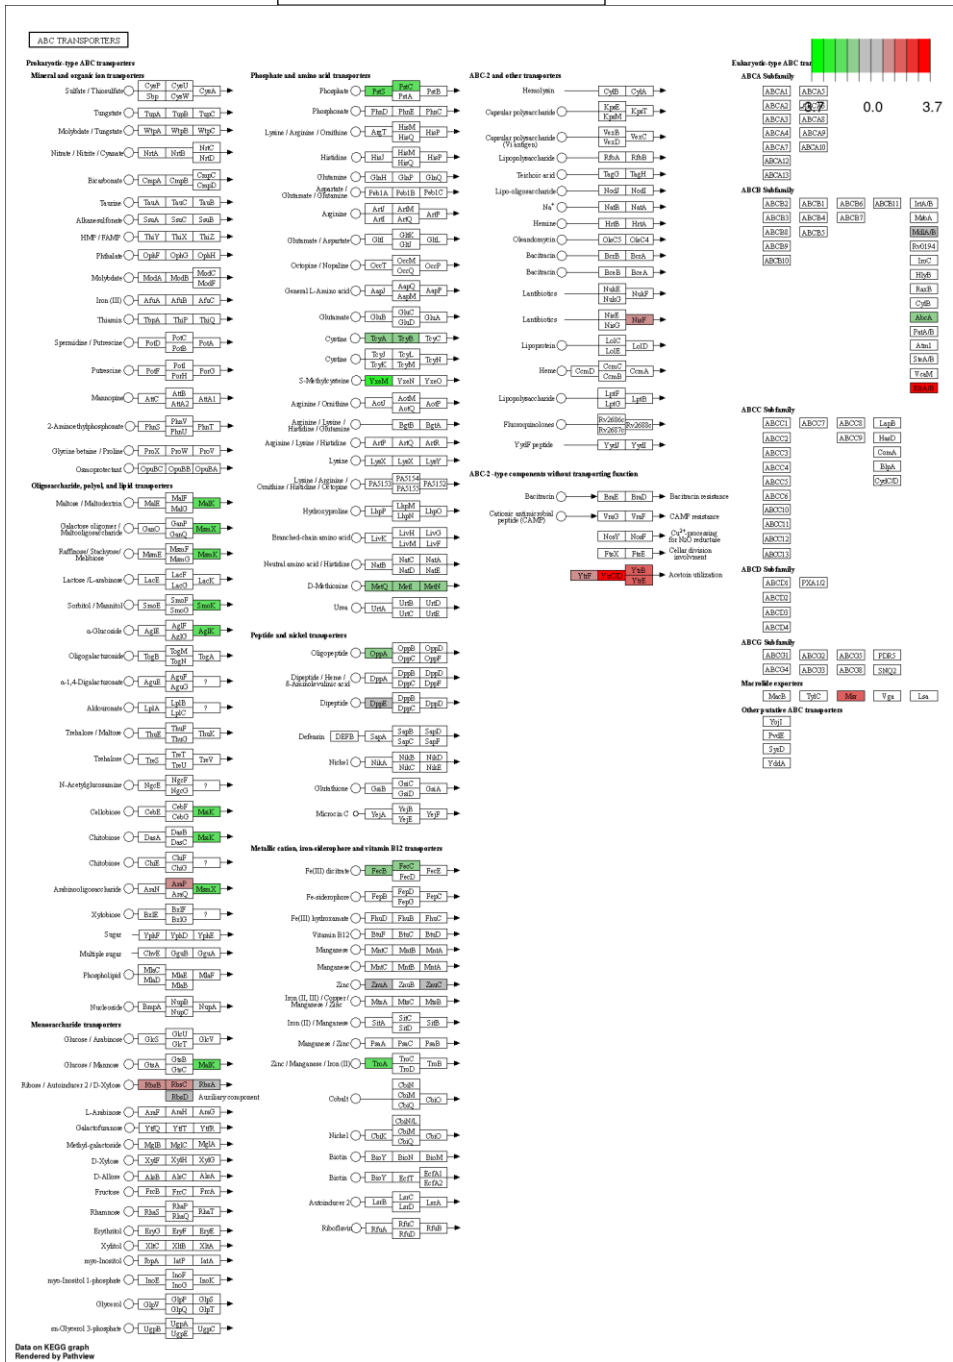

Sg6-1h vs. control-1h

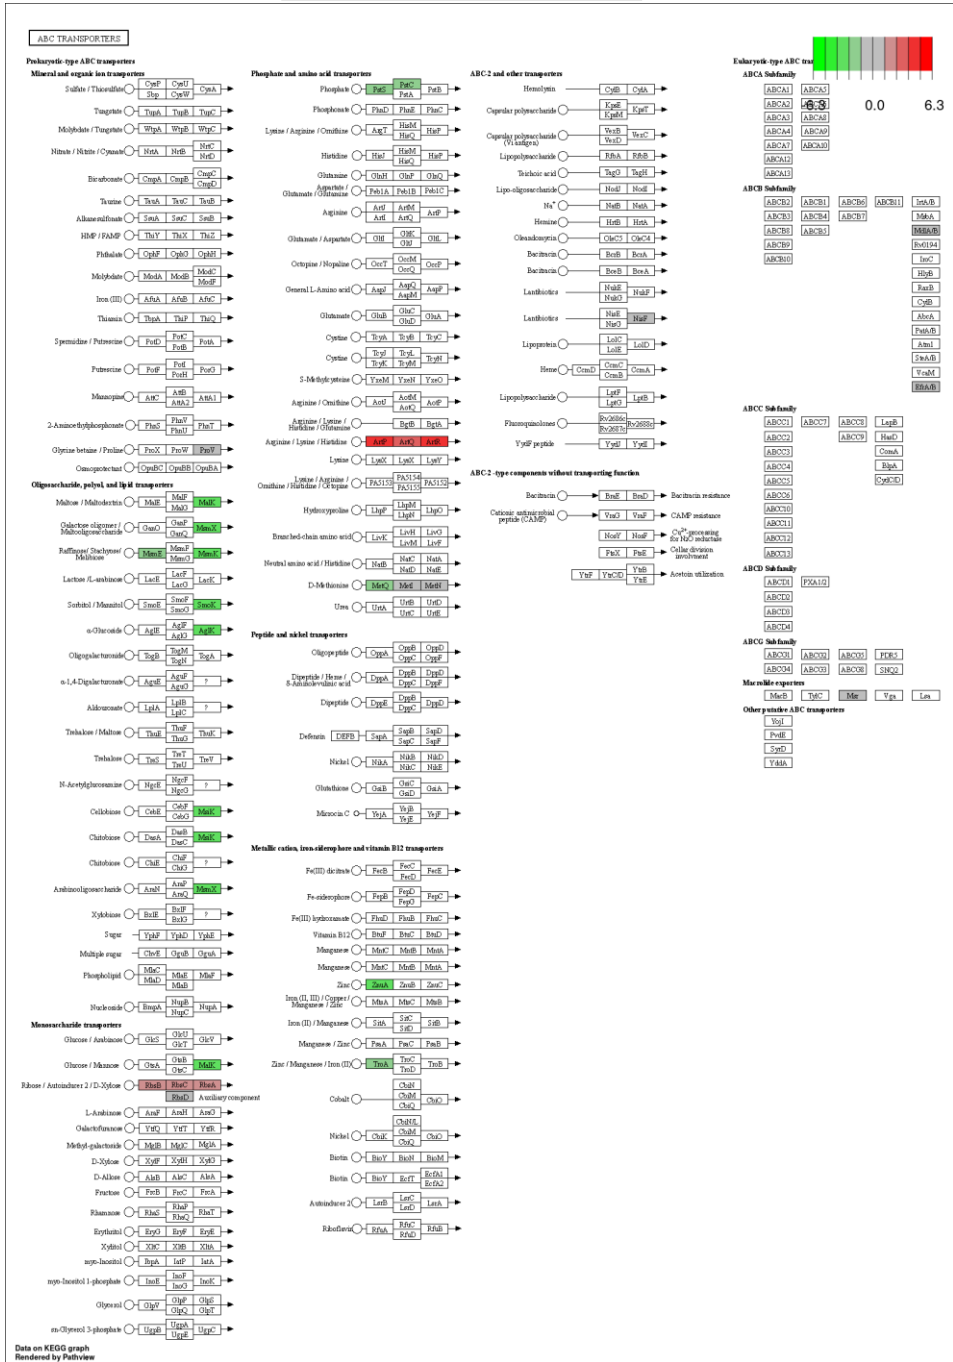

Supplement: s1 [file s1]
