# Supplementary material for: Disparate Effects of Two Clerodane Diterpenes of Giant Goldenrod (Solidago gigantea Ait.) on Bacillus spizizenii
Source: MDPI journal article supplement (doi:10.3390/ijms25031531), 2024-01-26
Supplement: s1 [file s1]

**Table S2. Overlapping *B. spizizenii* genes with different patterns that changed their activity after all types of treatments**

| gene_id       | Sg3a-5h          | Sg6-5h | Sg3a-1h | Sg6-1h | gene_description                                                                |
|---------------|------------------|--------|---------|--------|---------------------------------------------------------------------------------|
| gene:GYO_2763 | 1.2 <sup>a</sup> | 1.6    | -2.0    | -2.1   | && PF00528:Binding-protein-dependent transport system inner membrane component, |
| gene:GYO_0471 | 1.2              | -1.7   | -1.3    | -1.9   | - && PF01674:Lipase (class 2)                                                   |
| gene:GYO_1034 | 1.5              | -2.3   | -1.1    | -1.3   | - && -                                                                          |
| gene:GYO_4367 | 1.9              | -1.3   | -1.6    | -2.6   | - && -                                                                          |
| gene:GYO_4396 | 2.4              | -1.0   | -1.7    | -1.5   | - && PF06271:RDD family                                                         |
| gene:GYO_2119 | -1.2             | 1.7    | -2.0    | -2.1   | - && PF00083:Sugar (and other) transporter                                      |
| gene:GYO_4285 | -1.4             | 1.8    | -2.1    | -2.8   | transporter PF03459:TOBE domain PF07673:Protein of unknown function (DUF1602)   |
| gene:GYO_4341 | -1.0             | 1.0    | -1.8    | -1.5   | - && PF09021:HutP                                                               |
| gene:GYO_4342 | -1.3             | 2.0    | 1.9     | 1.6    | - && PF00221:Aromatic amino acid lyase                                          |
| gene:GYO_4343 | -1.2             | 2.1    | 2.5     | 2.3    | - && PF01175:Urocanase                                                          |

<sup>a</sup> log<sub>2</sub>FoldChange
