# Supplementary material for: Disparate Effects of Two Clerodane Diterpenes of Giant Goldenrod (Solidago gigantea Ait.) on Bacillus spizizenii
Source: Int J Mol Sci. 2024 Jan 26;25(3):1531. doi: 10.3390/ijms25031531 (PMC10855248; doi:10.3390/ijms25031531)
Supplement: Supplementary file 1 [file ijms-25-01531-s001.zip]

Archive with 8 entries (8 files):
- Figure S 1.pdf
- Figure S2.pdf
- Figure S3.pdf
- Figure S4.pdf
- Table S1.xlsx
- Table S2.pdf
- Table S3.pdf
- Table S4.xlsx
