# Supplementary material for: Disparate Effects of Two Clerodane Diterpenes of Giant Goldenrod (Solidago gigantea Ait.) on Bacillus spizizenii
Source: Int J Mol Sci. 2024 Jan 26;25(3):1531. doi: 10.3390/ijms25031531 (PMC10855248; doi:10.3390/ijms25031531)
Supplement: Supplementary file 1 [file ijms-25-01531-s001.zip › Table S1.xlsx]

## Sheet: Table caption
Table S1: Differentially expressed genes in B. spizizenii after Sg3a- and Sg6-treatments (|log2(FoldChange)| > 0, adjusted p-value < 0.05)
B. spizizenii RNA was isolated after 5 h or after 1 h of incubation. Cont:=controll

## Sheet: Sg3a-5h v.s. Cont-5h
gene_id	OD_02_Sg3a1	OD_02_Sg3a2	OD_02_Sg3a3	OD_02_Sg3a4	OD_02_Cont1	OD_02_Cont2	OD_02_Cont3	OD_02_Cont4	log2FoldChange	pvalue	padj	gene_name	gene_chr	gene_start	gene_end	gene_strand	gene_length	gene_biotype	gene_description	tf_family	OD_02_Sg3a1_readcount	OD_02_Sg3a2_readcount	OD_02_Sg3a3_readcount	OD_02_Sg3a4_readcount	OD_02_Cont1_readcount	OD_02_Cont2_readcount	OD_02_Cont3_readcount	OD_02_Cont4_readcount	OD_02_Sg3a1_fpkm	OD_02_Sg3a2_fpkm	OD_02_Sg3a3_fpkm	OD_02_Sg3a4_fpkm	OD_02_Cont1_fpkm	OD_02_Cont2_fpkm	OD_02_Cont3_fpkm	OD_02_Cont4_fpkm
gene:GYO_2935	2435.22	2044.78	1887.05	1981.16	151.207	157.734	152.666	178.995	3.7037	1.72829e-108	7.35731e-105	-	Chromosome	2704687	2705736	+	1050	protein_coding	- && PF00107:Zinc-binding dehydrogenase|PF08240:Alcohol dehydrogenase GroES-like domain	ADH_N	1803	2080	2194	2440	131	151	176	169	432.45	374.792	349.963	367.555	27.308	29.6515	29.4043	34.1509
gene:GYO_1723	25646.1	30443.6	22193	31418.5	1343.55	1182.49	1262.96	888.621	4.55166	1.3959e-98	2.97118e-95	-	Chromosome	1563886	1565985	+	2100	protein_coding	- && PF00367:phosphotransferase system, EIIB|PF00358:phosphoenolpyruvate-dependent sugar phosphotransferase system, EIIA 1|PF02378:Phosphotransferase system, EIIC	-	18988	30968	25803	38695	1164	1132	1456	839	2277.14	2790.04	2057.91	2914.45	121.322	111.144	121.627	84.7711
gene:GYO_1722	4697.56	5310.53	3463.6	4341.5	700.63	694.658	665.311	735.045	2.67171	6.14114e-48	8.71428e-45	glcT	Chromosome	1562811	1563656	+	846	protein_coding	- && PF00874:PRD domain|PF03123:CAT RNA binding domain	PRD	3478	5402	4027	5347	607	665	767	694	1035.35	1208.09	797.235	999.681	157.046	162.073	159.042	174.058
gene:GYO_2483	79.6883	61.9332	78.2685	77.9473	412.068	471.114	457.998	423.657	-2.56844	1.17421e-47	1.24965e-44	-	Chromosome	2331128	2331631	-	504	protein_coding	- && PF08802:Cytochrome B6-F complex Fe-S subunit|PF00355:Rieske [2Fe-2S] domain	-	59	63	91	96	357	451	528	400	29.4816	23.6497	30.2403	30.1275	155.04	184.504	183.777	168.397
gene:GYO_1190	746.909	889.675	1094.9	971.094	113.117	136.842	137.052	145.103	2.79854	5.81149e-44	4.9479e-41	-	Chromosome	1087874	1089472	+	1599	protein_coding	- && PF07690:Major Facilitator Superfamily	MFS_1	553	905	1273	1196	98	131	158	137	87.0976	107.082	133.338	118.305	13.4148	16.892	17.3339	18.1793
gene:GYO_2000	1642.39	1833.42	1554.19	1703.47	7261.39	5977.19	5976.53	6207.64	-1.9166	1.3414e-43	9.51726e-41	cheC	Chromosome	1818928	1819557	+	630	protein_coding	- && PF04509:CheC-like family	-	1216	1865	1807	2098	6291	5722	6890	5861	486.096	560.086	480.388	526.728	2185.68	1872.69	1918.52	1973.95
gene:GYO_1999	1218.29	1425.45	1138.76	1268.27	4986.37	4575.34	4184.44	4303.3	-1.83726	5.1141e-38	3.1101e-35	-	Chromosome	1818439	1818909	+	471	protein_coding	- && PF01584:CheW-like domain	-	902	1450	1324	1562	4320	4380	4824	4063	482.298	582.457	470.806	524.544	2007.57	1917.4	1796.7	1830.34
gene:GYO_2001	1142.65	1477.55	1128.44	1302.37	4545.44	4424.92	4546.15	4397.56	-1.82608	3.67548e-36	1.95582e-33	cheD	Chromosome	1819554	1820054	+	501	protein_coding	- && PF03975:CheD chemotactic sensory transduction	-	846	1503	1312	1604	3938	4236	5241	4152	425.267	567.594	438.602	506.394	1720.46	1743.32	1835.12	1758.43
gene:GYO_2593	2298.81	4521.12	2020.36	3742.28	213.536	207.875	240.275	199.119	3.86931	6.16604e-35	2.91654e-32	aspA	Chromosome	2419892	2421319	-	1428	protein_coding	- && PF10415:Fumarase C C-terminus|PF00206:Lyase	-	1702	4599	2349	4609	185	199	277	188	300.165	609.329	275.505	510.505	28.3564	28.7332	34.0283	27.9341
gene:GYO_1833	118.857	61.9332	82.569	77.9473	1027.28	744.799	728.633	749.873	-3.26034	1.51803e-34	6.46223e-32	coxB	Chromosome	1663964	1665034	+	1071	protein_coding	- && PF00116:Cytochrome C oxidase subunit II, periplasmic domain|PF00034:Cytochrome c|PF02790:Cytochrome C oxidase subunit II, transmembrane domain	-	88	63	96	96	890	713	840	708	20.693	11.1293	15.0126	14.1776	181.89	137.265	137.587	140.265
gene:GYO_1998	3711.59	4501.46	3426.61	4028.9	13681.3	12612.5	12688.6	12699.1	-1.72172	2.50631e-34	9.69943e-32	cheA	Chromosome	1816402	1818417	+	2016	protein_coding	- && PF01627:Hpt domain|PF01584:CheW-like domain|PF02895:Signal transducing histidine kinase, homodimeric domain|PF02518:Histidine kinase-, DNA gyrase B-, and HSP90-like ATPase|PF07194:P2 response regulator binding domain	Hpt	2748	4579	3984	4962	11853	12074	14628	11990	343.286	429.731	330.982	389.303	1286.9	1234.87	1272.87	1261.93
gene:GYO_1836	86.4416	45.2211	73.108	72.2637	1048.06	624.67	683.527	760.465	-3.4958	2.19599e-33	7.79028e-31	ctaF	Chromosome	1667561	1667893	+	333	protein_coding	- && PF03626:Prokaryotic Cytochrome C oxidase subunit IV	-	64	46	85	89	908	598	788	718	48.4022	26.1355	42.7513	42.2734	596.827	370.268	415.117	457.494
gene:GYO_2077	460.572	266.411	427.467	431.146	2984.89	2384.82	2610.94	2554.65	-2.73269	3.01905e-33	9.88623e-31	-	Chromosome	1954824	1962455	+	7632	protein_coding	- && PF00550:Phosphopantetheine attachment site|PF08242:Methyltransferase domain|PF00975:Thioesterase domain|PF02801:Beta-ketoacyl synthase, C-terminal domain|PF00109:Beta-ketoacyl synthase, N-terminal domain|PF14765:Polyketide synthase dehydratase|PF1619	ketoacyl-synt	341	271	497	531	2586	2283	3010	2412	11.2524	6.71812	10.9067	11.0047	74.1647	61.6775	69.1857	67.057
gene:GYO_4555	702.338	717.639	505.735	751.867	3158.03	3196.47	2752.33	3108.59	-2.19006	2.33132e-32	7.08888e-30	-	Chromosome	923253	924113	+	861	protein_coding	- && PF00015:Methyl-accepting chemotaxis protein (MCP) signalling domain	-	520	730	588	926	2736	3060	3173	2935	152.1	160.412	114.38	170.11	695.537	732.786	646.48	723.286
gene:GYO_2003	1283.12	1598.47	1207.57	1478.56	4692.03	4623.39	4970.32	4576.56	-1.76011	2.61833e-32	7.43081e-30	-	Chromosome	1820862	1821374	+	513	protein_coding	- && -	-	950	1626	1404	1821	4065	4426	5730	4321	466.375	599.68	458.379	561.454	1734.4	1778.91	1959.41	1787.2
gene:GYO_3453	2601.35	2711.3	2419.44	2529.23	1117.32	1072.8	1147.6	1123.75	1.20127	2.90891e-31	7.73951e-29	-	Chromosome	3191716	3193206	+	1491	protein_coding	- && PF00361:Proton-conducting membrane transporter	-	1926	2758	2813	3115	968	1027	1323	1061	325.318	349.972	315.985	330.447	142.104	142.021	155.658	150.988
gene:GYO_1192	634.805	608.518	826.55	695.03	78.4891	96.103	98.8859	137.689	2.7492	3.30489e-30	8.27583e-28	-	Chromosome	1090038	1090412	+	375	protein_coding	- && -	-	470	619	961	856	68	92	114	130	315.643	312.303	429.207	361.047	39.6903	50.5843	53.3288	73.5559
gene:GYO_0603	703.689	1022.39	861.814	897.206	121.196	180.715	165.677	165.226	2.46048	4.38552e-30	1.03718e-27	-	Chromosome	555664	555951	-	288	protein_coding	- && PF03992:Antibiotic biosynthesis monooxygenase	ABM	521	1040	1002	1105	105	173	191	156	455.59	683.215	582.707	606.864	79.8002	123.855	116.34	114.931
gene:GYO_0602	1485.71	2007.42	2126.15	2052.61	388.983	489.917	410.29	450.136	2.14164	1.47246e-29	3.2991e-27	-	Chromosome	554898	555647	-	750	protein_coding	- && PF00881:Nitroreductase family	Nitroreductase	1100	2042	2472	2528	337	469	473	425	369.369	515.123	552.029	533.135	98.3503	128.935	110.634	120.236
gene:GYO_1049	163.429	132.714	221.044	203.8	932.635	985.056	948.091	890.739	-2.37767	2.56411e-29	5.4577e-27	-	Chromosome	967342	971589	-	4248	protein_coding	- && PF02872:5'-nucleotidase, C-terminal domain|PF00149:Calcineurin-like phosphoesterase	Metallophos	121	135	257	251	808	943	1093	841	7.17349	6.01265	10.1327	9.34568	41.6327	45.7706	45.1361	42.0065
gene:GYO_0819	302.546	715.673	544.439	474.18	31.1648	31.3379	46.8407	38.1292	3.78376	1.84008e-28	3.73012e-26	-	Chromosome	738856	739290	-	435	protein_coding	- && PF01047:MarR family	MarR	224	728	633	584	27	30	54	36	129.685	316.635	243.719	212.347	13.5857	14.2197	21.7767	17.5598
gene:GYO_1047	2830.96	2576.62	2082.29	2398.5	570.2	504.541	641.891	686.325	2.04029	2.40324e-28	4.65027e-26	treR	Chromosome	965783	966499	+	717	protein_coding	- && PF07702:UTRA domain|PF00392:Bacterial regulatory proteins, gntR family	UTRA	2096	2621	2421	2954	494	483	740	648	736.21	691.615	565.523	651.648	150.805	138.895	181.051	191.761
gene:GYO_1552	641.559	330.31	465.311	382.429	3496.23	3628.93	4754.33	3128.71	-3.04597	5.67063e-28	1.04956e-25	-	Chromosome	1420947	1422077	+	1131	protein_coding	- && PF13424:Tetratricopeptide repeat	-	475	336	541	471	3029	3474	5481	2954	105.769	56.2074	80.1142	65.8688	586.197	633.324	850.13	554.183
gene:GYO_1724	11363	12522.3	9073.99	11838.3	2947.96	3245.57	3406.36	3499.41	1.77383	2.98067e-27	5.28697e-25	-	Chromosome	1566084	1566350	+	267	protein_coding	- && PF00381:PTS HPr component phosphorylation site	PTS-HPr	8413	12738	10550	14580	2554	3107	3927	3304	7935.4	9026.23	6617.84	8637.1	2093.71	2399.32	2580.11	2625.63
gene:GYO_3771	129.662	145.494	139.335	126.664	402.834	487.827	510.911	480.851	-1.79887	3.32646e-27	5.6643e-25	epsA	Chromosome	3488448	3489152	-	705	protein_coding	- && PF02706:Chain length determinant protein	-	96	148	162	156	349	467	589	454	34.2935	39.7182	38.4858	34.9991	108.354	136.58	146.56	136.638
gene:GYO_1045	15409.6	11765.3	14479.7	14569.7	1164.64	1961.76	2453.07	2058.97	2.87958	1.13964e-26	1.86594e-24	treP	Chromosome	962588	964000	+	1413	protein_coding	- && PF00367:phosphotransferase system, EIIB|PF02378:Phosphotransferase system, EIIC	-	11409	11968	16835	17944	1009	1878	2828	1944	2033.46	1602.49	1995.47	2008.62	156.299	274.039	351.096	291.917
gene:GYO_3279	60.7792	26.5428	61.9267	44.6573	728.333	620.491	480.551	445.899	-3.55655	1.5037e-26	2.37083e-24	-	Chromosome	3038623	3039921	+	1299	protein_coding	- && PF02056:Family 4 glycosyl hydrolase|PF11975:Family 4 glycosyl hydrolase C-terminal domain	-	45	27	72	55	631	594	554	421	8.72434	3.93252	9.28321	6.69692	106.323	94.2836	74.815	68.7667
gene:GYO_2067	28.3636	19.6613	27.523	25.1705	148.898	171.314	138.787	150.398	-2.60146	2.02478e-26	3.07839e-24	-	Chromosome	1889951	1892233	+	2283	protein_coding	- && PF00698:Acyl transferase domain|PF03060:Nitronate monooxygenase	Acyl_transf_1	21	20	32	31	129	164	160	142	2.31656	1.65745	2.34757	2.14772	12.3678	14.8114	12.2943	13.1974
gene:GYO_0912	158.026	135.663	172.879	204.612	1187.72	814.787	1071.26	786.943	-2.52175	8.63209e-26	1.26713e-23	purH	Chromosome	827333	828871	+	1539	protein_coding	- && PF02142:MGS-like domain|PF01808:AICARFT/IMPCHase bienzyme	-	117	138	201	252	1029	780	1235	743	19.1459	16.9651	21.8742	25.899	146.347	104.5	140.772	102.437
gene:GYO_3278	24.3117	8.8476	24.0826	15.4271	251.627	324.87	253.287	188.527	-3.8213	1.04786e-25	1.48691e-23	-	Chromosome	3037773	3038603	+	831	protein_coding	- && PF00528:Binding-protein-dependent transport system inner membrane component	BPD_transp_1	18	9	28	19	218	311	292	178	5.45508	2.04908	5.64329	3.61638	57.4199	77.1646	61.641	45.449
gene:GYO_4396	1027.84	744.182	731.94	1076.65	201.994	162.957	154.401	146.162	2.42869	1.3833e-25	1.89958e-23	-	Chromosome	4090370	4090825	+	456	protein_coding	- && PF06271:RDD family	-	761	757	851	1326	175	156	178	138	420.29	314.085	312.565	459.939	84.0002	70.5373	68.4768	64.2125
gene:GYO_2076	511.896	262.479	484.233	453.069	3263.07	2618.81	2802.64	2501.7	-2.70878	3.15407e-25	4.1959e-23	-	Chromosome	1938286	1954809	+	16524	protein_coding	- && PF16197:Ketoacyl-synthetase C-terminal extension|PF00550:Phosphopantetheine attachment site|PF14765:Polyketide synthase dehydratase|PF08659:KR domain|PF00109:Beta-ketoacyl synthase, N-terminal domain|PF13193:AMP-binding enzyme C-terminal domain|PF005	AMP-binding	379	267	563	558	2827	2507	3231	2362	5.77635	3.05712	5.70648	5.34122	37.4471	31.2823	34.3013	30.3298
gene:GYO_1996	1357.4	1544.4	1233.37	1416.04	3309.24	3595.51	3831.4	3740.89	-1.38303	3.33056e-24	4.29642e-22	-	Chromosome	1814434	1815324	+	891	protein_coding	- && PF01656:CobQ/CobB/MinD/ParA nucleotide binding domain	CbiA	1005	1571	1434	1744	2867	3442	4417	3532	284.065	333.592	269.554	309.593	704.299	796.512	869.637	841.101
gene:GYO_1835	116.156	53.0856	116.973	95.8103	1626.34	862.838	897.78	1025.25	-3.53103	5.51398e-24	6.90382e-22	-	Chromosome	1666935	1667558	+	624	protein_coding	- && PF00510:Cytochrome c oxidase subunit III	-	86	54	136	118	1409	826	1035	968	34.7091	16.3729	36.5031	29.9102	494.235	272.932	290.967	329.152
gene:GYO_1017	1125.09	1262.26	916.86	1476.13	151.207	232.945	174.352	243.603	2.5754	1.61618e-23	1.96574e-21	-	Chromosome	940936	941883	-	948	protein_coding	- && PF01497:Periplasmic binding protein	Peripla_BP_2	833	1284	1066	1818	131	223	201	230	221.292	256.256	188.332	303.324	30.2462	48.5015	37.1943	51.4784
gene:GYO_2075	145.87	86.5099	159.117	155.895	902.624	709.282	721.694	756.228	-2.49575	2.62391e-23	3.10277e-21	-	Chromosome	1925514	1938296	+	12783	protein_coding	- && PF08242:Methyltransferase domain|PF00550:Phosphopantetheine attachment site|PF08659:KR domain|PF02801:Beta-ketoacyl synthase, C-terminal domain|PF16197:Ketoacyl-synthetase C-terminal extension|PF14765:Polyketide synthase dehydratase|PF00109:Beta-keto	ketoacyl-synt	108	88	185	192	782	679	832	714	2.12775	1.30247	2.4239	2.37569	13.39	10.9521	11.4177	11.8514
gene:GYO_2482	183.688	77.6623	111.812	118.545	835.678	940.138	854.409	809.185	-2.8134	2.70338e-23	3.11035e-21	-	Chromosome	2330452	2331126	-	675	protein_coding	- && PF13631:Cytochrome b(N-terminal)/b6/petB	-	136	79	130	146	724	900	985	764	50.7416	22.1432	32.2563	34.2114	234.77	274.915	255.989	240.157
gene:GYO_1536	4777.25	4961.54	4187.8	3922.54	1410.49	1326.64	1687.13	1503.98	1.58971	4.56214e-23	5.1108e-21	-	Chromosome	1403663	1404085	+	423	protein_coding	- && -	-	3537	5047	4869	4831	1222	1270	1945	1420	2105.83	2257.4	1927.86	1806.42	632.322	619.045	806.617	712.284
gene:GYO_2201	310.649	239.868	311.354	296.362	1127.7	862.838	1052.18	924.632	-1.77669	5.18977e-23	5.5395e-21	-	Chromosome	2068239	2084336	-	16098	protein_coding	- && PF13745:HxxPF-repeated domain|PF13193:AMP-binding enzyme C-terminal domain|PF00501:AMP-binding enzyme|PF00550:Phosphopantetheine attachment site|PF00668:Condensation domain	AMP-binding	230	244	362	365	977	826	1213	873	3.5982	2.8677	3.76627	3.58627	13.284	10.5795	13.2183	11.5066
gene:GYO_0818	436.26	943.744	712.158	586.229	92.3401	65.8097	94.5488	76.2583	3.02544	5.32812e-23	5.5395e-21	-	Chromosome	738211	738840	-	630	protein_coding	- && PF00881:Nitroreductase family	Nitroreductase	323	960	828	722	80	63	109	72	129.119	288.302	220.123	181.267	27.7944	20.6186	30.3511	24.2492
gene:GYO_1834	291.74	153.358	351.778	284.995	4999.06	2591.65	2402.75	2909.47	-3.57582	5.3352e-23	5.5395e-21	ctaD	Chromosome	1665067	1666935	+	1869	protein_coding	- && PF00115:Cytochrome C and Quinol oxidase polypeptide I	-	216	156	409	351	4331	2481	2770	2747	29.1054	15.7918	36.6513	29.7043	507.208	273.701	259.991	311.856
gene:GYO_1877	44.5714	58.0009	77.4084	66.58	369.36	580.797	610.664	864.261	-3.29094	5.53436e-23	5.60947e-21	-	Chromosome	1702861	1707162	+	4302	protein_coding	- && PF05922:Peptidase inhibitor I9|PF13754:Bacterial Ig-like domain (group 3)|PF13715:CarboxypepD_reg-like domain|PF13620:Carboxypeptidase regulatory-like domain|PF00082:Subtilase family|PF05547:Immune inhibitor A peptidase M6	Peptidase_S8	33	59	90	82	320	556	704	816	1.93185	2.59477	3.50386	3.01485	16.2812	26.6479	28.7072	40.2462
gene:GYO_1674	8872.42	10095.1	6965.9	6252.84	1344.7	1664.04	1733.97	1932.94	2.26928	1.56821e-22	1.55253e-20	-	Chromosome	1523714	1524610	+	897	protein_coding	- && PF01435:Peptidase family M48	Peptidase_M48	6569	10269	8099	7701	1165	1593	1999	1825	1844.32	2165.97	1512.22	1357.93	284.276	366.17	390.939	431.694
gene:GYO_1837	131.013	85.5268	119.553	115.297	1034.21	599.599	710.417	586.765	-2.70049	2.28244e-22	2.20826e-20	ctaG	Chromosome	1667920	1668813	+	894	protein_coding	- && PF09678:Cytochrome c oxidase caa3 assembly factor (Caa3_CtaG)	-	97	87	139	142	896	574	819	554	27.3252	18.4119	26.0407	25.1231	219.37	132.383	160.707	131.485
gene:GYO_3098	35.1169	31.4581	38.7042	38.9737	211.228	220.41	157.003	166.285	-2.38133	3.4158e-22	3.23134e-20	-	Chromosome	2859621	2861108	-	1488	protein_coding	- && PF06964:Alpha-L-arabinofuranosidase C-terminus	-	26	32	45	48	183	211	181	157	4.40048	4.06877	5.06506	5.10223	26.9188	29.2374	21.3385	22.3873
gene:GYO_4245	28.3636	11.7968	18.062	14.6151	154.67	395.903	277.575	386.587	-4.08253	1.4021e-21	1.29756e-19	-	Chromosome	3937284	3938651	+	1368	protein_coding	- && PF02225:PA domain|PF04389:Peptidase family M28	-	21	12	21	18	134	379	320	365	3.86601	1.65963	2.57104	2.08117	21.4401	57.1231	41.0348	56.6125
gene:GYO_1983	1877.4	1442.16	1539.57	1705.91	5257.61	4836.49	4173.16	4547.96	-1.51939	2.94682e-21	2.66907e-19	flgG	Chromosome	1803769	1804563	+	795	protein_coding	- && PF06429:Flagellar basal body rod FlgEFG protein C-terminal|PF00460:Flagella basal body rod protein	-	1390	1467	1790	2101	4555	4630	4811	4294	440.329	349.124	377.104	418.004	1254.09	1200.81	1061.59	1146.04
gene:GYO_2074	121.558	67.8316	115.253	98.2461	839.141	550.503	537.801	570.878	-2.6347	3.32273e-21	2.93965e-19	-	Chromosome	1911807	1925498	+	13692	protein_coding	- && PF16197:Ketoacyl-synthetase C-terminal extension|PF02801:Beta-ketoacyl synthase, C-terminal domain|PF00109:Beta-ketoacyl synthase, N-terminal domain|PF08659:KR domain|PF14765:Polyketide synthase dehydratase|PF00550:Phosphopantetheine attachment site	ketoacyl-synt	90	69	134	121	727	527	620	539	1.65541	0.953452	1.63913	1.39778	11.6218	7.93602	7.94352	8.35271
gene:GYO_1215	393.039	389.294	396.503	372.686	1141.55	1317.24	933.344	1166.12	-1.55469	3.38367e-21	2.93965e-19	glpP	Chromosome	1112602	1113174	+	573	protein_coding	- && PF04309:Glycerol-3-phosphate responsive antiterminator	-	291	396	461	459	989	1261	1076	1101	127.899	130.755	134.748	126.701	377.789	453.753	329.417	407.697
gene:GYO_2002	1384.42	2038.88	1334.01	1731.08	5912.07	5349.39	5939.23	5744.79	-1.82202	8.28307e-21	7.05221e-19	-	Chromosome	1820077	1820841	+	765	protein_coding	- && PF04542:Sigma-70 region 2|PF04539:Sigma-70 region 3|PF04545:Sigma-70, region 4	Sigma70_r4	1025	2074	1551	2132	5122	5121	6847	5424	337.436	512.937	339.567	440.806	1465.5	1380.23	1570.1	1504.4
gene:GYO_2212	133.714	130.748	245.987	181.877	866.843	889.998	1079.94	981.826	-2.45946	1.41626e-20	1.18216e-18	-	Chromosome	2104830	2106593	+	1764	protein_coding	- && PF01019:Gamma-glutamyltranspeptidase	-	99	133	286	224	751	852	1245	927	14.134	14.2649	27.1545	20.085	93.1855	99.5864	123.811	111.503
gene:GYO_3179	222.857	149.426	316.514	204.612	1124.24	1385.14	1557.02	1225.43	-2.56575	2.49643e-20	2.04371e-18	-	Chromosome	2943829	2944020	+	192	protein_coding	- && -	-	165	152	368	252	974	1326	1795	1157	216.427	149.782	321.012	207.597	1110.36	1423.97	1640.03	1278.61
gene:GYO_1189	441.663	514.144	533.258	530.204	48.4786	91.9246	102.356	103.796	2.5392	2.8536e-20	2.29203e-18	-	Chromosome	1087177	1087833	+	657	protein_coding	- && PF13437:HlyD family secretion protein	-	327	523	620	653	42	88	118	98	125.346	150.61	158.052	157.206	13.9924	27.617	31.5068	31.6494
gene:GYO_3122	152.623	194.647	173.739	150.211	663.694	660.186	505.706	527.453	-1.8105	3.50642e-20	2.76423e-18	-	Chromosome	2886182	2887684	-	1503	protein_coding	- && PF06964:Alpha-L-arabinofuranosidase C-terminus	-	113	198	202	185	575	632	583	498	18.9343	24.9243	22.5096	19.4686	83.7367	86.6996	68.0452	70.3033
gene:GYO_2591	2248.83	4977.27	2366.98	4620	407.451	462.757	468.407	433.19	3.00392	6.95973e-20	5.38683e-18	-	Chromosome	2417006	2418325	-	1320	protein_coding	- && PF00390:Malic enzyme, N-terminal domain|PF02826:D-isomer specific 2-hydroxyacid dehydrogenase, NAD binding domain|PF03949:Malic enzyme, NAD binding domain	malic	1665	5063	2752	5690	353	443	540	409	317.665	725.689	349.18	681.805	58.534	69.1972	71.7642	65.7438
gene:GYO_1994	2826.91	3682.57	2756.6	3046.44	8452.58	7600.5	8297.74	7846.13	-1.38672	1.53232e-19	1.16483e-17	flhA	Chromosome	1811304	1813337	+	2034	protein_coding	- && PF00771:FHIPEP family	-	2093	3746	3205	3752	7323	7276	9566	7408	259.148	348.444	263.908	291.765	788.035	737.566	825.026	772.779
gene:GYO_2268	569.974	547.568	627.008	620.331	1344.7	1582.57	1371.39	1662.85	-1.33303	2.00322e-19	1.49609e-17	-	Chromosome	2157386	2158300	+	915	protein_coding	- && PF13354:Beta-lactamase enzyme family	-	422	557	729	764	1165	1515	1581	1570	116.15	115.173	133.439	132.067	278.684	341.39	303.109	364.069
gene:GYO_1725	50693.9	58126.8	42105	57081	18681.6	15197.9	13261.1	15017.6	1.74265	2.18095e-19	1.60074e-17	ptsI	Chromosome	1566350	1568062	+	1713	protein_coding	- && PF00391:PEP-utilising enzyme, mobile domain|PF02896:PEP-utilising enzyme, TIM barrel domain|PF05524:PEP-utilising enzyme, N-terminal	-	37533	59128	48954	70301	16185	14549	15288	14179	5518.05	6530.59	4786.36	6491.21	2068.06	1751.2	1565.6	1756.28
gene:GYO_0557	214.753	297.869	154.817	206.236	959.183	961.03	959.367	910.863	-2.11841	2.38948e-19	1.72407e-17	-	Chromosome	488398	490122	-	1725	protein_coding	- && PF00672:HAMP domain|PF00015:Methyl-accepting chemotaxis protein (MCP) signalling domain	HAMP	159	303	180	254	831	920	1106	860	23.2133	33.233	17.4767	23.2898	105.443	109.966	112.475	105.783
gene:GYO_2073	137.766	58.984	129.014	86.0668	833.369	678.989	627.145	664.083	-2.77122	3.24409e-19	2.30168e-17	-	Chromosome	1896662	1911805	+	15144	protein_coding	- && PF00109:Beta-ketoacyl synthase, N-terminal domain|PF13745:HxxPF-repeated domain|PF00668:Condensation domain|PF08659:KR domain|PF14765:Polyketide synthase dehydratase|PF13193:AMP-binding enzyme C-terminal domain|PF00550:Phosphopantetheine attachment s	AMP-binding	102	60	150	106	722	650	723	627	1.69625	0.749596	1.65892	1.1071	10.4353	8.84976	8.37502	8.78481
gene:GYO_2200	221.507	185.8	233.945	203.8	747.955	559.905	628.88	605.83	-1.58929	3.3622e-19	2.34638e-17	-	Chromosome	2060306	2068141	-	7836	protein_coding	- && PF00668:Condensation domain|PF13193:AMP-binding enzyme C-terminal domain|PF00975:Thioesterase domain|PF00501:AMP-binding enzyme|PF00550:Phosphopantetheine attachment site	AMP-binding	164	189	272	251	648	536	725	572	5.27083	4.56335	5.81366	5.06642	18.1004	14.1036	16.2305	15.4884
gene:GYO_1651	339.013	459.092	586.584	527.768	100.42	105.504	108.428	123.92	2.12745	7.26158e-19	4.98589e-17	-	Chromosome	1503371	1503886	+	516	protein_coding	- && PF03413:Peptidase propeptide and YPEB domain	-	251	467	682	650	87	101	125	117	122.505	171.232	221.365	199.244	36.9043	40.3581	42.496	48.1107
gene:GYO_1995	1262.86	1680.06	1239.4	1311.3	3559.71	3684.3	4186.17	3873.29	-1.47802	7.40856e-19	5.00607e-17	flhF	Chromosome	1813337	1814437	+	1101	protein_coding	- && PF00448:SRP54-type protein, GTPase domain	-	935	1709	1441	1615	3084	3527	4826	3657	213.872	293.678	219.206	232.01	613.104	660.507	768.932	704.763
gene:GYO_1328	33.7662	6.88147	33.5437	22.7346	298.951	291.443	346.101	296.56	-3.67725	8.01236e-19	5.32947e-17	-	Chromosome	1217477	1218622	-	1146	protein_coding	- && PF00082:Subtilase family	Peptidase_S8	25	7	39	28	259	279	399	280	5.49395	1.15566	5.69974	3.86452	49.4678	50.1971	61.0768	51.8416
gene:GYO_3427	19804.6	14978	8129.61	10304.5	2211.55	1556.45	1803.37	1690.39	2.87346	8.4707e-19	5.54766e-17	-	Chromosome	3167323	3167715	-	393	protein_coding	- && PF00575:S1 RNA binding domain	S1	14663	15236	9452	12691	1916	1490	2079	1596	9396.36	7334.91	4028.15	5107.7	1067.11	781.723	928.005	861.679
gene:GYO_0129	47205.2	48339.4	27296.8	37398.5	10420.6	10084.6	9588.47	9052.5	2.03328	1.79856e-18	1.15913e-16	rplK	Chromosome	118671	119096	+	426	protein_coding	- && PF03946:Ribosomal protein L11, N-terminal domain|PF00298:Ribosomal protein L11, RNA binding domain	-	34950	49172	31737	46060	9028	9654	11054	8547	20661.7	21838.6	12477.6	17101.6	4638.62	4672.58	4551.96	4257.06
gene:GYO_4090	33459.6	34026.9	28279.9	32675.4	14575.9	13780.3	11626.9	12120.8	1.30168	1.82432e-18	1.15913e-16	fba	Chromosome	3795391	3796248	-	858	protein_coding	- && PF01116:Fructose-bisphosphate aldolase class-II	F_bP_aldolase	24773	34613	32880	40243	12628	13192	13404	11444	7271.44	7632.53	6418.29	7418.65	3221.47	3170.17	2740.53	2830.06
gene:GYO_2481	452.468	163.189	371.56	318.285	2410.08	2657.46	2351.58	2029.32	-2.85682	2.86955e-18	1.79643e-16	-	Chromosome	2329650	2330417	-	768	protein_coding	- && PF13442:Cytochrome C oxidase, cbb3-type, subunit III|PF00032:Cytochrome b(C-terminal)/b6/petD	-	335	166	432	392	2088	2544	2711	1916	109.853	40.8944	94.2101	80.7322	595.082	682.991	619.236	529.346
gene:GYO_3803	343.065	422.719	266.629	320.721	1718.68	2492.41	4855.82	2532.41	-3.10017	1.0499e-17	6.47741e-16	-	Chromosome	3520634	3522574	-	1941	protein_coding	- && PF02687:FtsX-like permease family	-	254	430	310	395	1489	2386	5598	2391	32.9562	41.914	26.7492	32.1879	167.91	253.457	505.936	261.372
gene:GYO_0909	209.351	120.917	192.661	258.201	1645.96	878.507	1568.3	1237.08	-2.76998	1.16436e-17	7.081e-16	purF	Chromosome	824181	825611	+	1431	protein_coding	- && PF13522:Glutamine amidotransferase domain|PF00156:Phosphoribosyl transferase domain	Pribosyltran	155	123	224	318	1426	841	1808	1168	27.2786	16.2623	26.217	35.1487	218.116	121.176	221.639	173.184
gene:GYO_1335	574.026	732.385	411.985	645.501	47.3243	88.7908	78.9353	115.447	2.83712	1.18984e-17	7.13402e-16	-	Chromosome	1220898	1221869	+	972	protein_coding	- && PF01497:Periplasmic binding protein	Peripla_BP_2	425	745	479	795	41	85	91	109	110.116	145.013	82.5362	129.367	9.23262	18.0307	16.4234	23.7939
gene:GYO_2222	37.8182	21.6275	53.3258	55.2127	293.18	309.201	451.926	289.146	-2.99205	1.27026e-17	7.51042e-16	-	Chromosome	2118794	2120011	+	1218	protein_coding	- && PF00067:Cytochrome P450	p450	28	22	62	68	254	296	521	273	5.78949	3.41737	8.52549	8.83046	45.645	50.1076	75.0375	47.5577
gene:GYO_0913	309.299	227.088	311.354	369.438	2594.76	1385.14	1665.45	1341.93	-2.52059	3.36785e-17	1.96396e-15	purD	Chromosome	828887	830155	+	1269	protein_coding	- && PF02843:Phosphoribosylglycinamide synthetase, C domain|PF02844:Phosphoribosylglycinamide synthetase, N domain|PF01071:Phosphoribosylglycinamide synthetase, ATP-grasp (A) domain	-	229	231	362	455	2248	1326	1920	1267	45.4468	34.4403	47.7773	56.7115	387.741	215.447	265.416	211.846
gene:GYO_2333	5217.56	2106.71	3963.31	2717.6	18950.5	28021.3	36024.8	27783.4	-2.98385	4.23597e-17	2.43683e-15	-	Chromosome	2201582	2203069	+	1488	protein_coding	- && PF00171:Aldehyde dehydrogenase family	Aldedh	3863	2143	4608	3347	16418	26825	41531	26232	653.809	272.481	518.662	355.774	2415.04	3717.03	4896.18	3740.54
gene:GYO_3584	268.779	385.362	899.658	431.958	5882.06	4690.25	3935.49	5612.4	-3.33969	4.52076e-17	2.56598e-15	-	Chromosome	3314387	3316171	-	1785	protein_coding	- && PF00441:Acyl-CoA dehydrogenase, C-terminal domain|PF02770:Acyl-CoA dehydrogenase, middle domain|PF02771:Acyl-CoA dehydrogenase, N-terminal domain	-	199	392	1046	532	5096	4490	4537	5299	28.0766	41.5494	98.1451	47.1406	624.883	518.641	445.881	629.885
gene:GYO_0910	66.1818	54.0687	69.6676	99.0581	689.088	342.628	498.767	390.824	-2.72863	6.52198e-17	3.65317e-15	purM	Chromosome	825712	826752	+	1041	protein_coding	- && PF02769:AIR synthase related protein, C-terminal domain|PF00586:AIR synthase related protein, N-terminal domain	-	49	55	81	122	597	328	575	369	11.8543	9.99605	13.0319	18.5366	125.525	64.9654	96.8959	75.2109
gene:GYO_1181	1045.4	1660.4	898.798	915.881	275.866	207.875	194.302	197.001	2.3699	6.81374e-17	3.76702e-15	-	Chromosome	1080238	1080711	+	474	protein_coding	- && PF00588:SpoU rRNA Methylase family	SpoU_methylase	774	1689	1045	1128	239	199	224	186	411.237	674.168	369.244	376.402	110.364	86.5633	82.9006	83.2607
gene:GYO_1993	1289.87	1541.45	1168.01	1240.66	4366.53	3379.28	3490.5	3322.53	-1.47432	1.08145e-16	5.8325e-15	flhB	Chromosome	1810189	1811271	+	1083	protein_coding	- && PF01312:FlhB HrpN YscU SpaS Family	-	955	1568	1358	1528	3783	3235	4024	3137	222.077	273.927	210.013	223.16	764.566	615.892	651.805	614.598
gene:GYO_1279	135.065	54.0687	91.1699	125.041	570.2	633.027	607.194	549.695	-2.5451	1.08238e-16	5.8325e-15	-	Chromosome	1174592	1175359	+	768	protein_coding	- && PF00378:Enoyl-CoA hydratase/isomerase	ECH	100	55	106	154	494	606	700	519	32.792	13.5493	23.1164	31.7162	140.79	162.694	159.891	143.388
gene:GYO_3125	58.0779	74.7131	74.8282	77.9473	452.466	396.947	261.094	276.436	-2.27323	1.10344e-16	5.87166e-15	-	Chromosome	2889526	2890827	-	1302	protein_coding	- && PF01547:Bacterial extracellular solute-binding protein	SBP_bac_1	43	76	87	96	392	380	301	261	8.31739	11.0438	11.1914	11.6622	65.8995	60.1771	40.5549	42.5339
gene:GYO_2592	1605.92	4392.34	1525.81	3022.08	305.877	267.417	279.309	184.291	3.34649	1.15657e-16	6.05421e-15	-	Chromosome	2418343	2419749	-	1407	protein_coding	- && PF03553:Na+/H+ antiporter family	-	1189	4468	1774	3722	265	256	322	174	212.822	600.808	211.171	418.412	41.2248	37.515	40.1467	26.2398
gene:GYO_0908	217.455	167.121	194.381	293.114	1499.37	784.493	1355.78	1154.47	-2.45783	1.16619e-16	6.05421e-15	purL	Chromosome	821977	824205	+	2229	protein_coding	- && PF00586:AIR synthase related protein, N-terminal domain|PF02769:AIR synthase related protein, C-terminal domain	-	161	170	226	361	1299	751	1563	1090	18.1905	14.4296	16.9814	25.6164	127.558	69.4686	123.009	103.758
gene:GYO_1612	45.9221	15.7291	15.4817	24.3585	450.158	332.182	334.824	181.113	-3.70007	1.61029e-16	8.25902e-15	-	Chromosome	1468167	1469093	+	927	protein_coding	- && PF00528:Binding-protein-dependent transport system inner membrane component	BPD_transp_1	34	16	18	30	390	318	386	171	9.23695	3.26555	3.25213	5.11874	92.0857	70.7304	73.0459	39.1401
gene:GYO_1191	263.377	254.614	382.742	322.345	48.4786	35.5163	50.3104	78.3766	2.52553	2.10939e-16	1.06901e-14	-	Chromosome	1089495	1090025	+	531	protein_coding	- && PF03358:NADPH-dependent FMN reductase	FMN_red	195	259	445	397	42	34	58	74	92.4846	92.283	140.359	118.255	17.3126	13.2021	19.1612	29.5694
gene:GYO_4203	210.701	297.869	196.961	220.851	64.6381	57.4529	66.7914	52.9572	1.93637	2.95342e-16	1.47914e-14	-	Chromosome	3900251	3901432	-	1182	protein_coding	- && PF01098:Cell cycle protein	-	156	303	229	272	56	55	77	50	33.2381	48.5	32.4484	36.3976	10.37	9.5941	11.4278	8.97548
gene:GYO_1978	1670.75	1363.51	1329.7	1678.3	3545.86	3285.26	3526.06	3514.24	-1.19934	3.90524e-16	1.9331e-14	fliI	Chromosome	1799497	1800780	+	1284	protein_coding	- && PF02874:ATP synthase alpha/beta family, beta-barrel domain|PF00006:ATP synthase alpha/beta family, nucleotide-binding domain	ATP-synt_ab	1237	1387	1546	2067	3072	3145	4065	3318	242.624	204.375	201.66	254.623	523.677	505.027	555.372	548.298
gene:GYO_2055	717.195	500.381	1274.66	862.292	5878.6	5328.5	4401.29	4543.72	-2.58619	4.42425e-16	2.16483e-14	-	Chromosome	1875184	1876362	+	1179	protein_coding	- && PF00155:Aminotransferase class I and II	Aminotran_1_2	531	509	1482	1062	5093	5101	5074	4290	113.425	81.6809	210.528	142.473	945.512	892.073	754.962	772.056
gene:GYO_0998	822.546	1138.39	674.313	1065.28	2919.1	3813.83	3552.09	3311.94	-1.87728	4.7407e-16	2.29331e-14	-	Chromosome	921782	923239	+	1458	protein_coding	- && PF00171:Aldehyde dehydrogenase family	Aldedh	609	1158	784	1312	2529	3651	4095	3127	105.194	150.268	90.0603	142.331	379.663	516.313	492.702	455.067
gene:GYO_1937	348.468	334.243	362.96	397.044	1200.42	848.214	1009.68	903.449	-1.45619	6.28134e-16	3.00446e-14	recG	Chromosome	1763390	1765438	+	2049	protein_coding	- && PF00270:DEAD/DEAH box helicase|PF00271:Helicase conserved C-terminal domain	Helicase_C	258	340	422	489	1040	812	1164	853	31.7108	31.3945	34.4942	37.7475	111.096	81.7096	99.655	88.3308
gene:GYO_2054	498.39	580.992	979.647	716.953	2710.18	3270.64	2827.79	2868.16	-2.07128	7.21592e-16	3.41313e-14	tdh	Chromosome	1874143	1875171	+	1029	protein_coding	- && PF08240:Alcohol dehydrogenase GroES-like domain|PF00107:Zinc-binding dehydrogenase	ADH_N	369	591	1139	883	2348	3131	3260	2708	90.3109	108.665	185.389	135.727	499.448	627.374	555.764	558.391
gene:GYO_2065	108.052	99.2898	102.351	89.3147	290.871	325.915	279.309	241.485	-1.51558	7.68321e-16	3.59422e-14	-	Chromosome	1887609	1888475	+	867	protein_coding	- && PF00698:Acyl transferase domain	Acyl_transf_1	80	101	119	110	252	312	322	228	23.2381	22.0404	22.9881	20.0676	63.6193	74.1984	65.1516	55.7983
gene:GYO_1990	1227.74	1162.97	1128.44	1043.36	5105.25	3568.35	3546.88	3012.2	-1.73948	8.00103e-16	3.70221e-14	fliP	Chromosome	1808453	1809118	+	666	protein_coding	- && PF00813:FliP family	-	909	1183	1312	1285	4423	3416	4089	2844	343.731	336.068	329.94	305.176	1453.62	1057.55	1077.04	906.068
gene:GYO_3130	55.3766	64.8824	55.9061	71.4517	236.621	185.938	184.761	198.06	-1.69388	8.40299e-16	3.8464e-14	araA	Chromosome	2895239	2896729	-	1491	protein_coding	- && PF02610:L-arabinose isomerase|PF11762:L-arabinose isomerase C-terminal domain	-	41	66	65	88	205	178	213	187	6.92525	8.37496	7.30148	9.33527	30.0942	24.6151	25.0605	26.6115
gene:GYO_3277	32.4156	3.93227	11.1812	13.8032	309.339	297.71	253.287	183.232	-4.12547	1.07228e-15	4.84126e-14	-	Chromosome	3036865	3037776	+	912	protein_coding	- && PF00528:Binding-protein-dependent transport system inner membrane component	BPD_transp_1	24	4	13	17	268	285	292	173	6.62744	0.829816	2.38739	2.94833	64.3202	64.4331	56.1664	40.2491
gene:GYO_1201	2913.35	743.199	3968.47	1221.99	165.058	78.3449	93.6814	74.14	4.42805	1.08038e-15	4.84126e-14	-	Chromosome	1097090	1098481	+	1392	protein_coding	- && PF00375:Sodium:dicarboxylate symporter family	SDF	2157	756	4614	1505	143	75	108	70	390.248	102.754	555.154	171.009	22.4856	11.1092	13.6105	10.67
gene:GYO_0911	51.3247	45.2211	52.4657	69.8278	425.919	219.366	379.93	249.958	-2.53864	1.11504e-15	4.94451e-14	purN	Chromosome	826749	827336	+	588	protein_coding	- && PF00551:Formyl transferase	-	38	46	61	86	369	210	438	236	16.2755	14.8012	17.3751	23.1336	137.359	73.6378	130.673	85.1608
gene:GYO_2536	3640	3964.71	1786.41	2322.99	548.269	617.358	448.456	490.383	2.47671	1.89346e-15	8.30974e-14	-	Chromosome	2376326	2376574	+	249	protein_coding	- && PF13370:4Fe-4S single cluster domain of Ferredoxin I	-	2695	4033	2077	2861	475	591	517	463	2725.77	3064.4	1397.05	1817.36	417.543	489.381	364.233	394.536
gene:GYO_1992	1041.35	1112.83	930.621	1019	4394.23	3002.18	3107.1	2680.69	-1.68381	2.01434e-15	8.75006e-14	fliR	Chromosome	1809410	1810189	+	780	protein_coding	- && PF01311:Bacterial export proteins, family 1	-	771	1132	1082	1255	3807	2874	3582	2531	248.937	274.58	232.331	254.49	1068.31	759.716	805.599	688.498
gene:GYO_2202	137.766	84.5437	168.578	123.417	574.817	453.356	614.134	533.808	-2.08097	2.0914e-15	8.99301e-14	-	Chromosome	2084393	2096308	-	11916	protein_coding	- && PF00202:Aminotransferase class-III|PF00501:AMP-binding enzyme|PF00550:Phosphopantetheine attachment site|PF00109:Beta-ketoacyl synthase, N-terminal domain|PF16197:Ketoacyl-synthetase C-terminal extension|PF02801:Beta-ketoacyl synthase, C-terminal dom	AMP-binding	102	86	196	152	498	434	708	504	2.15575	1.36548	2.75487	2.0176	9.14758	7.50962	10.423	8.9744
gene:GYO_0508	114.805	101.256	74.8282	95.8103	271.249	317.558	362.582	301.856	-1.70501	2.13017e-15	9.06811e-14	-	Chromosome	440442	442421	+	1980	protein_coding	- && PF00128:Alpha amylase, catalytic domain|PF16738:Starch-binding module 26	-	85	103	87	118	235	304	418	285	10.8114	9.84212	7.35917	9.42624	25.9782	31.6568	37.0339	30.5411
gene:GYO_2625	1172.36	1008.63	1354.65	1435.53	3865.59	9677.16	8169.37	10066.1	-2.67625	2.22574e-15	9.38115e-14	-	Chromosome	2444807	2445823	+	1017	protein_coding	- && PF00724:NADH:flavin oxidoreductase / NADH oxidase family	Oxidored_FMN	868	1026	1575	1768	3349	9264	9418	9504	214.945	190.872	259.379	274.969	720.778	1878.18	1624.52	1982.85
gene:GYO_3685	911.689	930.964	864.394	725.885	245.856	328.004	325.283	339.985	1.46847	2.64707e-15	1.10476e-13	-	Chromosome	3406999	3407325	+	327	protein_coding	- && PF01638:HxlR-like helix-turn-helix	DUF24	675	947	1005	894	213	314	375	321	519.859	547.922	514.746	432.426	142.574	197.989	201.174	208.287
gene:GYO_3124	37.8182	67.8316	41.2845	56.0246	238.93	218.321	192.567	189.587	-2.03938	2.8665e-15	1.18473e-13	-	Chromosome	2888549	2889490	-	942	protein_coding	- && PF00528:Binding-protein-dependent transport system inner membrane component	BPD_transp_1	28	69	48	69	207	209	222	179	7.48577	13.8585	8.53425	11.5856	48.098	45.7461	41.3419	40.3188
gene:GYO_1188	71.5844	103.222	106.652	99.0581	5.77126	5.22299	15.6136	13.7689	3.21572	3.25114e-15	1.32485e-13	-	Chromosome	1086667	1087131	+	465	protein_coding	- && PF01047:MarR family	MarR	53	105	124	122	5	5	18	13	28.7047	42.7221	44.6626	41.4981	2.35355	2.21705	6.79059	5.93193
gene:GYO_3182	121.558	84.5437	176.319	88.5027	488.248	628.848	627.145	621.717	-2.32882	3.26779e-15	1.32485e-13	-	Chromosome	2945110	2945412	+	303	protein_coding	- && PF14007:YtpI-like protein	-	90	86	205	109	423	602	723	587	74.8048	53.6998	113.315	56.8991	305.566	409.65	418.585	411.056
gene:GYO_1997	1333.09	1847.18	1189.51	1407.11	4300.74	3872.33	3961.51	3920.95	-1.47466	5.35052e-15	2.14879e-13	cheB	Chromosome	1815326	1816396	+	1071	protein_coding	- && PF00072:Response regulator receiver domain|PF01339:CheB methylesterase	CheB_methylest	987	1879	1383	1733	3726	3707	4567	3702	232.09	331.936	216.276	255.936	761.484	713.661	748.048	733.419
gene:GYO_1314	6.75325	8.8476	12.0413	11.3673	54.2498	75.2111	97.1511	75.1992	-2.92458	5.45309e-15	2.16951e-13	-	Chromosome	1206891	1207667	+	777	protein_coding	- && PF10086:Putative membrane peptidase family (DUF2324)	-	5	9	14	14	47	72	112	71	1.62061	2.19148	3.01774	2.84989	13.2399	19.106	25.2863	19.3884
gene:GYO_3103	940.052	563.297	1055.33	663.364	2839.46	3351.07	3535.61	3159.42	-2.00013	5.89661e-15	2.32425e-13	-	Chromosome	2864623	2866302	-	1680	protein_coding	- && PF13193:AMP-binding enzyme C-terminal domain|PF00501:AMP-binding enzyme	AMP-binding	696	573	1227	817	2460	3208	4076	2983	104.335	64.53	122.324	76.9192	320.504	393.717	425.611	376.747
gene:GYO_2594	578.078	2201.09	587.444	850.113	49.6328	42.8285	95.4163	32.8334	4.25274	7.05816e-15	2.75657e-13	-	Chromosome	2421365	2422354	-	990	protein_coding	- && PF00710:Asparaginase	-	428	2239	683	1047	43	41	110	31	108.877	427.893	115.547	167.276	9.50693	8.53901	19.4915	6.64403
gene:GYO_4017	1189.92	968.321	869.555	818.447	330.116	387.546	318.343	309.27	1.51442	7.90667e-15	3.05988e-13	-	Chromosome	3739473	3740054	+	582	protein_coding	- && PF01569:PAP2 superfamily	-	881	985	1011	1008	286	371	367	292	381.226	320.206	290.94	273.942	107.56	131.435	110.619	106.455
gene:GYO_4083	33952.6	27666.4	19466.5	31715.6	4693.19	7116.85	7970.73	6885.49	2.08063	1.1088e-14	4.25238e-13	-	Chromosome	3789963	3790163	-	201	protein_coding	- && PF01197:Ribosomal protein L31	-	25138	28143	22633	39061	4066	6813	9189	6501	31496.6	26490.5	18859.1	30737.5	4427.7	6988.78	8019.74	6862.61
gene:GYO_0598	3236.16	2412.45	2287.85	2644.53	307.031	498.273	538.668	741.4	2.3426	1.28704e-14	4.89189e-13	-	Chromosome	550637	551395	+	759	protein_coding	- && PF00005:ABC transporter	ABC_tran	2396	2454	2660	3257	266	477	621	700	795.013	611.715	586.969	678.731	76.7091	129.579	143.528	195.687
gene:GYO_1241	305.247	255.597	467.891	297.986	84.2603	79.3895	82.4049	84.7315	2.0052	1.34597e-14	5.07061e-13	-	Chromosome	1140438	1140929	-	492	protein_coding	- && PF08281:Sigma-70, region 4|PF04542:Sigma-70 region 2	Sigma70_r2	226	260	544	367	73	76	95	80	115.684	99.9827	185.186	117.984	32.4762	31.8499	33.8725	34.5009
gene:GYO_3450	3241.56	3758.26	2753.16	2892.17	1308.92	1251.43	1445.99	1250.85	1.26585	1.44329e-14	5.38954e-13	cpa	Chromosome	3188562	3190967	+	2406	protein_coding	- && PF13244:Domain of unknown function (DUF4040)|PF00361:Proton-conducting membrane transporter|PF00662:NADH-Ubiquinone oxidoreductase (complex I), chain 5 N-terminus	-	2400	3823	3201	3562	1134	1198	1667	1181	251.215	300.625	222.826	234.164	103.163	102.664	121.543	104.15
gene:GYO_3945	486.234	440.414	321.675	350.763	1228.12	1693.29	2185.03	1426.67	-2.03246	1.52954e-14	5.66194e-13	-	Chromosome	3666688	3667929	-	1242	protein_coding	- && PF00877:NlpC/P60 family	-	360	448	374	432	1064	1621	2519	1347	72.9979	68.2453	50.4342	55.0154	187.511	269.104	355.791	230.118
gene:GYO_4028	914.39	864.116	713.878	758.363	376.286	314.424	310.537	347.399	1.26907	1.59426e-14	5.84483e-13	-	Chromosome	3749026	3749427	-	402	protein_coding	- && PF02082:Transcriptional regulator	Rrf2	677	879	830	934	326	301	358	328	424.123	413.694	345.802	367.487	177.5	154.383	156.223	173.122
gene:GYO_4339	117.507	31.4581	51.6056	53.5888	511.333	654.963	610.664	437.426	-3.13537	1.6064e-14	5.84483e-13	-	Chromosome	4031207	4032580	-	1374	protein_coding	- && PF16369:C-terminal of Glycosyl hydrolases family 43|PF04616:Glycosyl hydrolases family 43	-	87	32	60	66	443	627	704	413	15.9464	4.40636	7.31374	7.59764	70.5707	94.0892	89.8823	63.7777
gene:GYO_1991	367.377	375.532	306.193	336.96	1469.36	1016.39	993.196	921.455	-1.66718	2.20475e-14	7.95391e-13	fliQ	Chromosome	1809133	1809402	+	270	protein_coding	- && PF01313:Bacterial export proteins, family 3	-	272	382	356	415	1273	973	1145	870	253.708	267.68	220.832	243.112	1031.98	743.033	743.926	683.692
sRNA00044	6.75325	3.93227	2.58028	4.05976	91.1858	44.9177	56.3823	51.898	-3.87218	2.24597e-14	8.03453e-13	-	Chromosome	2134944	2135211	+	268	-	-	-	5	4	3	5	79	43	65	49	4.69856	2.82385	1.87483	2.95092	64.5208	33.0821	42.5468	38.7942
gene:GYO_1618	17.5584	8.8476	18.9221	14.6151	205.457	108.638	124.909	86.8497	-3.13502	2.6373e-14	9.3558e-13	-	Chromosome	1474866	1475756	+	891	protein_coding	- && PF00877:NlpC/P60 family	-	13	9	22	18	178	104	144	82	3.67447	1.91109	4.13542	3.19534	43.727	24.0666	28.3513	19.5273
gene:GYO_3804	63.4805	89.4591	49.8854	85.2549	317.419	459.623	792.822	420.48	-2.78802	3.33823e-14	1.17445e-12	-	Chromosome	3522549	3523328	-	780	protein_coding	- && PF07673:Protein of unknown function (DUF1602)|PF00005:ABC transporter	ABC_tran	47	91	58	105	275	440	914	397	15.1751	22.0731	12.454	21.292	77.1694	116.31	205.561	107.994
gene:GYO_2359	2859.33	2391.8	2510.61	2713.54	1298.53	1285.9	1033.1	1210.6	1.11771	5.00625e-14	1.74685e-12	-	Chromosome	2228716	2229324	+	609	protein_coding	- && PF00881:Nitroreductase family	Nitroreductase	2117	2433	2919	3342	1125	1231	1191	1143	875.453	755.86	802.771	867.982	404.336	416.773	343.07	398.23
gene:GYO_3016	78.3377	58.0009	97.1906	91.7505	330.116	527.522	566.426	297.619	-2.40229	7.42363e-14	2.5693e-12	bofC	Chromosome	2782670	2783182	-	513	protein_coding	- && PF08955:BofC C-terminal domain|PF08977:Bypass of Forespore C, N terminal	-	58	59	113	113	286	505	653	281	28.4734	21.7596	36.8923	34.8404	122.027	202.971	223.298	116.224
gene:GYO_1615	124.26	44.238	141.055	97.4342	1060.76	650.785	847.47	588.884	-2.95216	7.52449e-14	2.58321e-12	-	Chromosome	1471070	1472725	+	1656	protein_coding	- && PF00496:Bacterial extracellular solute-binding proteins, family 5 Middle	-	92	45	164	120	919	623	977	556	13.9913	5.14125	16.5866	11.4615	121.468	77.5687	103.496	71.2393
gene:GYO_3454	671.273	760.894	620.128	665.8	352.047	311.29	299.26	305.033	1.10131	1.02276e-13	3.48311e-12	-	Chromosome	3193212	3193688	+	477	protein_coding	- && PF01899:Na+/H+ ion antiporter subunit	-	497	774	721	820	305	298	345	288	262.402	307.001	253.158	271.905	139.955	128.812	126.879	128.109
gene:GYO_1838	114.805	55.0517	98.0507	84.4429	320.882	307.112	353.908	333.63	-1.90681	1.52677e-13	5.15829e-12	-	Chromosome	1668844	1669206	-	363	protein_coding	- && PF08868:YugN-like family	-	85	56	114	104	278	294	408	315	58.9714	29.1876	52.5985	45.3157	167.628	166.994	197.17	184.123
gene:GYO_1980	1006.23	920.151	854.073	1016.56	2926.03	2349.3	2173.76	2049.44	-1.32291	1.73024e-13	5.7997e-12	-	Chromosome	1801238	1801852	+	615	protein_coding	- && PF03448:MgtE intracellular N domain	-	745	936	993	1252	2535	2249	2506	1935	305.078	287.95	270.426	321.996	902.215	754.003	714.816	667.592
gene:GYO_1729	1478.96	1029.27	846.332	1009.26	3506.62	4582.65	3964.98	3167.9	-1.80351	1.96759e-13	6.54376e-12	-	Chromosome	1570328	1572295	+	1968	protein_coding	- && PF02743:Cache domain|PF00672:HAMP domain|PF00015:Methyl-accepting chemotaxis protein (MCP) signalling domain	Cache_1	1095	1047	984	1243	3038	4387	4571	2991	140.126	100.656	83.7423	99.9005	337.886	459.623	407.45	322.475
gene:GYO_3633	268.779	69.7977	612.387	302.858	2901.79	6871.37	9286.6	9739.88	-4.52115	2.05987e-13	6.79759e-12	-	Chromosome	3358068	3359225	+	1158	protein_coding	- && PF00190:Cupin	-	199	71	712	373	2514	6578	10706	9196	43.2787	11.6002	102.978	50.9474	475.186	1171.24	1621.84	1684.98
gene:GYO_1977	1073.77	882.794	805.908	1042.55	2260.02	2062.04	2198.04	2000.72	-1.16385	2.19053e-13	7.17315e-12	-	Chromosome	1798715	1799467	+	753	protein_coding	- && PF02108:Flagellar assembly protein FliH	-	795	898	937	1284	1958	1974	2534	1889	265.89	225.631	208.41	269.707	569.148	540.519	590.337	532.283
gene:GYO_3723	706.39	802.183	771.504	600.032	109.654	208.92	205.579	211.829	1.96657	2.66229e-13	8.6139e-12	-	Chromosome	3443756	3444766	-	1011	protein_coding	- && PF00296:Luciferase-like monooxygenase	-	523	816	897	739	95	200	237	200	130.281	152.706	148.599	115.615	20.5674	40.7885	41.1231	41.9744
gene:GYO_3516	228.26	60.9501	310.494	224.911	1340.09	2909.21	3012.55	2895.7	-3.62245	2.67098e-13	8.6139e-12	-	Chromosome	3252984	3254957	-	1974	protein_coding	- && PF07676:WD40-like Beta Propeller Repeat|PF00326:Prolyl oligopeptidase family	PD40	169	62	361	277	1161	2785	3473	2734	21.561	5.94239	30.6292	22.195	128.734	290.896	308.635	293.871
gene:GYO_1981	2277.2	1870.78	1831.14	2115.95	6557.3	5209.41	4607.74	4677.18	-1.37898	2.80512e-13	8.97851e-12	-	Chromosome	1801865	1803328	+	1464	protein_coding	- && PF02120:Flagellar hook-length control protein FliK	-	1686	1903	2129	2606	5681	4987	5312	4416	290.032	245.932	243.562	281.55	849.358	702.356	636.51	640.02
gene:GYO_0597	2090.81	2441.94	1969.61	2357.09	288.563	435.597	476.214	718.099	2.20699	2.91167e-13	9.24997e-12	-	Chromosome	549696	550643	+	948	protein_coding	- && PF01032:FecCD transport family	-	1548	2484	2290	2903	250	417	549	678	411.237	495.747	404.578	484.351	57.7217	90.6957	101.59	151.749
gene:GYO_3276	43.2208	11.7968	13.7615	27.6063	203.148	206.83	209.048	155.694	-3.03159	3.99441e-13	1.25957e-11	-	Chromosome	3035591	3036868	+	1278	protein_coding	- && PF01547:Bacterial extracellular solute-binding protein	SBP_bac_1	32	12	16	34	176	198	241	147	6.30592	1.77651	2.09683	4.20794	30.1432	31.9443	33.0807	24.4057
gene:GYO_1206	602.39	222.173	396.503	392.173	1941.45	2098.6	1870.16	1822.79	-2.26282	4.59441e-13	1.43812e-11	-	Chromosome	1101518	1105105	+	3588	protein_coding	- && PF00149:Calcineurin-like phosphoesterase|PF00565:Staphylococcal nuclease homologue|PF02872:5'-nucleotidase, C-terminal domain	Metallophos	446	226	461	483	1682	2009	2156	1721	31.3049	11.9172	21.5191	21.292	102.608	115.448	105.411	101.773
gene:GYO_1752	82.3896	39.3227	79.9887	91.7505	0	4.17839	3.46968	7.414	4.26966	4.8194e-13	1.49753e-11	-	Chromosome	1591781	1592236	+	456	protein_coding	- && PF00258:Flavodoxin	-	61	40	93	113	0	4	4	7	33.6895	16.5963	34.1581	39.1954	0	1.80865	1.5388	3.25716
gene:GYO_3017	384.935	282.14	325.115	398.668	858.763	1314.1	1445.99	1065.5	-1.75265	6.7128e-13	2.07075e-11	-	Chromosome	2783230	2784537	-	1308	protein_coding	- && PF07690:Major Facilitator Superfamily	MFS_1	285	287	378	491	744	1258	1667	1006	54.874	41.5136	48.4015	59.3739	124.501	198.304	223.571	163.191
gene:GYO_0904	533.507	570.179	510.896	704.774	1538.62	1271.28	1550.08	1322.87	-1.29195	7.29654e-13	2.23463e-11	purB	Chromosome	818971	820266	+	1296	protein_coding	- && PF10397:Adenylosuccinate lyase C-terminus|PF00206:Lyase	-	395	580	594	868	1333	1217	1787	1249	76.7576	84.6719	76.7638	105.934	225.129	193.617	241.884	204.486
gene:GYO_2977	1107.53	1245.55	1556.77	1142.42	547.115	520.21	557.751	528.512	1.23066	7.52351e-13	2.28769e-11	-	Chromosome	2744669	2745751	-	1083	protein_coding	- && PF02618:YceG-like family	-	820	1267	1810	1407	474	498	643	499	190.684	221.342	279.914	205.488	95.7981	94.8112	104.153	97.7636
gene:GYO_0955	151.273	78.6453	85.1493	65.7681	465.163	519.165	395.544	385.528	-2.22346	8.39486e-13	2.53453e-11	-	Chromosome	871719	873452	+	1734	protein_coding	- && PF06580:Histidine kinase|PF02518:Histidine kinase-, DNA gyrase B-, and HSP90-like ATPase|PF00672:HAMP domain	His_kinase	112	80	99	81	403	497	456	364	16.2667	8.72886	9.56227	7.38852	50.8702	59.0971	46.1322	44.5408
gene:GYO_2648	9208.73	7418.22	8719.63	9476.28	17166	17525.2	16057.7	17917.5	-0.97957	8.61456e-13	2.58255e-11	-	Chromosome	2465728	2467011	-	1284	protein_coding	- && PF00364:Biotin-requiring enzyme|PF02817:e3 binding domain|PF00198:2-oxoacid dehydrogenases acyltransferase (catalytic domain)	Biotin_lipoyl	6818	7546	10138	11671	14872	16777	18512	16917	1337.28	1111.91	1322.4	1437.69	2535.2	2694.07	2529.16	2795.53
gene:GYO_2759	3433.35	2503.87	2312.79	2433.42	1021.51	1059.22	1080.81	1113.16	1.32085	9.30474e-13	2.76995e-11	-	Chromosome	2557646	2558110	+	465	protein_coding	- && PF02618:YceG-like family	-	2542	2547	2689	2997	885	1014	1246	1051	1376.74	1036.32	968.529	1019.43	416.579	449.618	470.06	479.573
gene:GYO_3653	1.35065	0.983067	8.60094	7.30756	61.1753	92.9692	104.958	60.3712	-4.05203	9.57369e-13	2.83022e-11	-	Chromosome	3375591	3376016	+	426	protein_coding	- && -	-	1	1	10	9	53	89	121	57	0.59118	0.444127	3.93156	3.3416	27.2316	43.0764	49.8269	28.3903
gene:GYO_3696	506.494	75.6961	115.253	138.844	4701.27	3675.94	2937.09	3077.87	-4.10854	9.98424e-13	2.93124e-11	-	Chromosome	3417937	3421029	-	3093	protein_coding	- && PF04738:Lantibiotic dehydratase, C terminus|PF14028:Lantibiotic biosynthesis dehydratase C-term	-	375	77	134	171	4073	3519	3386	2906	30.5338	4.71007	7.25604	8.74456	288.232	234.584	192.042	199.352
gene:GYO_1987	872.52	713.707	865.254	921.565	5144.5	3003.22	2709.82	2604.43	-1.99661	1.59799e-12	4.65935e-11	fliN	Chromosome	1806262	1807398	+	1137	protein_coding	- && PF04509:CheC-like family|PF01052:Type III flagellar switch regulator (C-ring) FliN C-term	-	646	726	1006	1135	4457	2875	3124	2459	143.087	120.807	148.188	157.891	858.004	521.358	481.991	458.884
gene:GYO_3694	255.273	28.5089	49.8854	56.8366	2971.04	2054.72	1753.92	1958.36	-4.49069	1.63877e-12	4.74574e-11	-	Chromosome	3414804	3416129	-	1326	protein_coding	- && PF05147:Lanthionine synthetase C-like protein	-	189	29	58	70	2574	1967	2022	1849	35.8961	4.13781	7.32587	8.3498	424.886	305.858	267.501	295.868
gene:GYO_0677	2432.52	2219.76	2473.63	2341.67	1282.37	1467.66	1298.53	1352.53	0.809698	1.7697e-12	5.09027e-11	-	Chromosome	625237	626322	+	1086	protein_coding	- && PF07478:D-ala D-ala ligase C-terminus|PF01820:D-ala D-ala ligase N-terminus	-	1801	2258	2876	2884	1111	1405	1497	1277	417.651	393.379	443.541	420.037	223.919	266.751	241.813	249.498
gene:GYO_3127	36.4675	28.5089	33.5437	43.8454	141.973	149.378	104.958	118.624	-1.84907	2.14624e-12	6.13191e-11	-	Chromosome	2892039	2892848	-	810	protein_coding	- && PF13242:HAD-hyrolase-like|PF13344:Haloacid dehalogenase-like hydrolase	-	27	29	39	54	123	143	121	112	8.39476	6.77376	8.06408	10.5446	33.2374	36.4007	26.2053	29.3385
gene:GYO_1046	2575.69	1878.64	2153.67	2236.93	286.254	336.361	693.936	506.27	2.27755	2.23141e-12	6.33273e-11	treC	Chromosome	964215	965762	+	1548	protein_coding	- && PF00128:Alpha amylase, catalytic domain|PF16657:Maltogenic Amylase, C-terminal domain	-	1907	1911	2504	2755	248	322	800	478	310.248	233.564	270.918	281.496	35.0661	42.8888	90.6582	65.5182
gene:GYO_3175	3005.2	3110.42	3451.56	2914.09	1411.65	1747.61	1557.89	1650.15	0.971011	2.60621e-12	7.34744e-11	-	Chromosome	2938035	2939267	-	1233	protein_coding	- && PF03949:Malic enzyme, NAD binding domain|PF00390:Malic enzyme, N-terminal domain	malic	2225	3164	4013	3589	1223	1673	1796	1558	454.461	485.501	545.106	460.397	217.105	279.764	255.524	268.108
gene:GYO_2569	3496.83	4238	2027.24	2572.26	854.146	858.66	797.159	828.25	1.88539	2.90609e-12	8.13897e-11	-	Chromosome	2400888	2401319	-	432	protein_coding	- && PF00160:Cyclophilin type peptidyl-prolyl cis-trans isomerase/CLD	Pro_isomerase	2589	4311	2357	3168	740	822	919	782	1509.31	1888.04	913.799	1159.91	374.934	392.326	373.181	384.086
gene:GYO_1742	37.8182	58.984	63.6469	36.5378	156.978	261.15	212.518	270.082	-2.18831	3.05046e-12	8.48747e-11	-	Chromosome	1584813	1585577	+	765	protein_coding	- && PF00106:short chain dehydrogenase	adh_short	28	60	74	45	136	250	245	255	9.21777	14.8391	16.2011	9.30407	38.9121	67.381	56.1814	70.7268
gene:GYO_2967	782.026	788.42	1023.51	674.732	197.377	244.436	316.608	283.85	1.64754	4.02674e-12	1.1131e-10	mtnN	Chromosome	2735918	2736613	-	696	protein_coding	- && PF01048:Phosphorylase superfamily	-	579	802	1190	831	171	234	365	268	209.507	218.013	286.36	188.848	53.7767	69.3211	91.9966	81.7017
gene:GYO_1643	1188.57	1460.84	1143.92	1170.02	600.211	642.428	573.365	609.007	1.0335	4.14476e-12	1.13834e-10	-	Chromosome	1495803	1496636	+	834	protein_coding	- && PF01740:STAS domain	STAS	880	1486	1330	1441	520	615	661	575	265.733	337.108	267.092	273.287	136.472	152.044	139.035	146.287
gene:GYO_0841	70.2338	60.9501	107.512	80.3832	265.478	271.596	229.866	241.485	-1.65295	4.55427e-12	1.24279e-10	-	Chromosome	756227	757555	+	1329	protein_coding	- && PF02378:Phosphotransferase system, EIIC	-	52	62	125	99	230	260	265	228	9.85389	8.82639	15.7529	11.7824	37.88	40.3373	34.9791	36.4012
gene:GYO_3193	2081.35	2559.91	2213.02	2109.45	1053.83	1202.33	994.931	1162.94	1.02232	5.29973e-12	1.437e-10	-	Chromosome	2953599	2954585	-	987	protein_coding	- && PF02384:N-6 DNA Methylase	-	1541	2604	2573	2598	913	1151	1147	1098	393.201	499.161	436.614	416.336	202.47	240.446	203.861	236.043
gene:GYO_3320	2785.04	1596.5	2043.58	950.795	310.494	364.565	403.351	298.678	2.4204	5.54388e-12	1.49369e-10	luxS	Chromosome	3076342	3076815	-	474	protein_coding	- && PF02664:S-Ribosylhomocysteinase (LuxS)	-	2062	1624	2376	1171	269	349	465	282	1095.57	648.223	839.543	390.751	124.217	151.812	172.093	126.234
gene:GYO_1325	163.429	201.529	226.205	179.441	447.849	687.346	730.368	874.852	-1.82898	5.96576e-12	1.59725e-10	-	Chromosome	1213986	1215575	+	1590	protein_coding	- && PF00501:AMP-binding enzyme|PF13193:AMP-binding enzyme C-terminal domain	AMP-binding	121	205	263	221	388	658	842	826	19.1654	24.3935	27.7034	21.9845	53.4124	85.3272	92.8973	110.227
gene:GYO_3778	126.961	88.476	90.3098	93.3744	270.095	299.8	260.226	233.012	-1.42285	6.87901e-12	1.83025e-10	-	Chromosome	3493411	3494766	-	1356	protein_coding	- && PF11954:Domain of unknown function (DUF3471)|PF00144:Beta-lactamase	Beta-lactamase	94	90	105	115	234	287	300	220	17.4581	12.5574	12.9689	13.414	37.7714	43.6396	38.8105	34.4246
gene:GYO_3451	717.195	712.723	645.93	647.937	367.052	277.863	289.718	333.63	1.10348	7.01743e-12	1.85548e-10	nha	Chromosome	3190960	3191391	+	432	protein_coding	- && PF04039:Domain related to MnhB subunit of Na+/H+ antiporter	-	531	725	751	798	318	266	334	315	309.557	317.52	291.16	292.174	161.12	126.957	135.628	154.715
gene:GYO_3128	35.1169	17.6952	27.523	25.9824	138.51	107.594	101.488	91.0863	-2.05714	7.37004e-12	1.93668e-10	araD	Chromosome	2892835	2893524	-	690	protein_coding	- && PF00596:Class II Aldolase and Adducin N-terminal domain	Aldolase_II	26	18	32	32	120	103	117	86	9.48973	4.9356	7.7674	7.33538	38.0662	30.7785	29.7458	26.4457
gene:GYO_0546	394.39	827.742	566.802	518.837	159.287	162.957	163.075	155.694	1.84882	8.2398e-12	2.15195e-10	-	Chromosome	482031	482882	-	852	protein_coding	- && PF00497:Bacterial extracellular solute-binding proteins, family 3	-	292	842	659	639	138	156	188	147	86.3123	186.977	129.545	118.627	35.4525	37.7523	38.7085	36.6086
gene:GYO_3585	64.8312	146.477	302.753	165.638	1222.35	1314.1	1138.92	1613.08	-2.9562	9.96391e-12	2.58636e-10	-	Chromosome	3316186	3317361	-	1176	protein_coding	- && PF00108:Thiolase, N-terminal domain|PF02803:Thiolase, C-terminal domain	Thiolase_N	48	149	352	204	1059	1258	1313	1523	10.2793	23.9715	50.1315	27.4375	197.104	220.563	195.86	274.788
gene:GYO_1984	291.74	242.818	250.287	297.986	1423.19	946.406	769.402	753.051	-1.84564	1.11759e-11	2.88339e-10	-	Chromosome	1804603	1804818	+	216	protein_coding	- && PF06289:Flagellar protein (FlbD)	-	216	247	291	367	1233	906	887	711	251.843	216.351	225.639	268.741	1249.44	864.835	720.374	698.427
gene:GYO_3447	1487.07	7104.62	1001.15	1294.25	138.51	155.645	155.268	146.162	4.19206	1.13796e-11	2.91824e-10	-	Chromosome	3186733	3188079	+	1347	protein_coding	- && PF03390:2-hydroxycarboxylate transporter family	Na_citrate	1101	7227	1164	1594	120	149	179	138	205.849	1015.1	144.731	187.173	19.4994	22.8075	23.3117	21.7379
gene:GYO_4077	2760.73	4085.63	2994.85	3318.45	1439.35	1351.71	1474.61	1461.62	1.20034	1.28903e-11	3.28587e-10	prfA	Chromosome	3783970	3785040	-	1071	protein_coding	- && PF03462:PCRF domain|PF00472:RF-1 domain	-	2044	4156	3482	4087	1247	1294	1700	1380	480.641	734.18	544.521	603.583	254.85	249.117	278.45	273.398
gene:GYO_0438	222.857	241.834	299.313	247.645	109.654	66.8543	86.742	77.3175	1.57448	1.4295e-11	3.62226e-10	-	Chromosome	373020	374432	-	1413	protein_coding	- && PF00324:Amino acid permease	AA_permease	165	246	348	305	95	64	100	73	29.4084	32.9389	41.2489	34.1412	14.716	9.33892	12.415	10.9619
gene:GYO_1988	1168.31	673.401	806.768	816.823	3547.01	2643.88	2596.19	2371.42	-1.68801	1.51149e-11	3.80735e-10	cheY	Chromosome	1807424	1807786	+	363	protein_coding	- && PF00072:Response regulator receiver domain	Response_reg	865	685	938	1006	3073	2531	2993	2239	600.121	357.027	432.784	438.342	1852.95	1437.62	1446.4	1308.74
gene:GYO_3102	290.39	462.041	436.068	324.781	1058.45	1140.7	946.356	1299.57	-1.55294	1.55651e-11	3.89769e-10	-	Chromosome	2863914	2864498	-	585	protein_coding	- && PF00440:Bacterial regulatory proteins, tetR family|PF08359:YsiA-like protein, C-terminal region	TetR_N	215	470	507	400	917	1092	1091	1227	92.5576	152.005	145.153	108.15	343.1	384.88	327.158	445.035
gene:GYO_4205	94.5455	61.9332	61.0667	43.8454	272.403	347.851	322.68	670.438	-2.63389	1.60099e-11	3.98563e-10	-	Chromosome	3903017	3903280	+	264	protein_coding	- && -	-	70	63	71	54	236	333	372	633	66.7765	45.1495	45.0432	32.3528	195.666	260.075	247.188	508.751
gene:GYO_1413	537.559	313.598	504.875	470.932	1252.36	1182.49	1413.9	1251.91	-1.48213	1.76443e-11	4.36696e-10	-	Chromosome	1299469	1299924	+	456	protein_coding	- && PF12690:Intracellular proteinase inhibitor	-	398	319	587	580	1085	1132	1630	1182	219.81	132.356	215.6	201.18	520.801	511.847	627.063	549.994
gene:GYO_0676	3394.18	1993.66	2029.82	2236.93	682.162	881.641	806.701	755.169	1.6264	1.89518e-11	4.66346e-10	-	Chromosome	624763	625083	-	321	protein_coding	- && PF00085:Thioredoxin	-	2513	2028	2360	2755	591	844	930	713	1971.59	1195.31	1231.35	1357.5	402.986	542.121	508.237	471.292
Novel00362	2.7013	6.88147	6.88075	8.11951	199.685	65.8097	59.852	63.5486	-3.94564	2.14502e-11	5.24791e-10	-	Chromosome	2445130	2445286	-	157	-	PF00724:NADH:flavin oxidoreductase / NADH oxidase family	Oxidored_FMN	2	7	8	10	173	63	69	60	3.20819	8.43558	8.53425	10.0745	241.187	82.737	77.097	81.0881
gene:GYO_4152	8309.2	7903.86	6222.78	7413.12	3581.64	2996.95	2512.05	2384.13	1.37928	2.20418e-11	5.36182e-10	pta	Chromosome	3853261	3854232	-	972	protein_coding	- && PF01515:Phosphate acetyl/butaryl transferase	-	6152	8040	7235	9130	3103	2869	2896	2251	1593.97	1564.97	1246.66	1485.68	698.751	608.588	522.661	491.377
gene:GYO_1441	56.7273	23.5936	68.8075	86.8788	565.583	522.299	420.699	261.608	-2.90307	2.30046e-11	5.56424e-10	-	Chromosome	1322373	1323362	+	990	protein_coding	- && PF00005:ABC transporter|PF08352:Oligopeptide/dipeptide transporter, C-terminal region	ABC_tran	42	24	80	107	490	500	485	247	10.6842	4.58662	13.5341	17.095	108.335	104.134	85.9399	52.9379
gene:GYO_1080	63.4805	54.0687	33.5437	39.7856	135.047	221.455	203.844	207.592	-2.02372	2.36496e-11	5.68794e-10	sspH	Chromosome	998889	999068	+	180	protein_coding	- && PF08141:Small acid-soluble spore protein H family	-	47	55	39	49	117	212	235	196	65.7589	57.8105	36.2883	43.0572	142.272	242.841	229.025	231.041
gene:GYO_4474	4797.51	5056.9	3998.58	3603.44	1757.92	2143.52	1726.17	1656.5	1.26077	2.5752e-11	6.15877e-10	-	Chromosome	4167696	4168625	+	930	protein_coding	- && PF01368:DHH family|PF02833:DHHA2 domain	-	3552	5144	4649	4438	1523	2052	1990	1564	961.877	1046.49	837.243	754.79	358.446	454.939	375.369	356.828
gene:GYO_1028	253.922	326.378	266.629	265.508	113.117	95.0584	112.765	72.0217	1.50075	2.83902e-11	6.7518e-10	-	Chromosome	950938	951732	+	795	protein_coding	- && PF00753:Metallo-beta-lactamase superfamily	Lactamase_B	188	332	310	327	98	91	130	68	59.5553	79.011	65.3085	65.0582	26.9815	23.6012	28.6856	18.1488
gene:GYO_0828	185.039	206.444	154.817	142.903	54.2498	66.8543	53.7801	62.4895	1.53557	3.08371e-11	7.29297e-10	-	Chromosome	745200	745544	+	345	protein_coding	- && PF07729:FCD domain	FCD	137	210	180	176	47	64	62	59	100.007	115.164	87.3833	80.6892	29.8185	38.249	31.5254	36.2859
gene:GYO_2225	5.4026	4.91533	15.4817	12.1793	51.9413	110.727	148.329	91.0863	-3.37252	3.14909e-11	7.40644e-10	-	Chromosome	2121285	2122043	+	759	protein_coding	- && -	-	4	5	18	15	45	106	171	86	1.32723	1.24636	3.97197	3.12587	12.9771	28.7954	39.5223	24.0415
gene:GYO_1388	183.688	237.902	264.909	278.499	96.9571	60.5867	74.5982	78.3766	1.64173	3.46888e-11	8.11375e-10	-	Chromosome	1275518	1276888	-	1371	protein_coding	- && PF01554:MatE	MatE	136	242	308	343	84	58	86	74	24.9822	33.396	37.626	39.5711	13.4106	8.72267	11.004	11.4525
gene:GYO_2487	1196.68	1377.28	1108.66	1168.4	334.733	536.923	355.642	498.856	1.4908	4.37683e-11	1.01815e-09	aroE	Chromosome	2334504	2335790	-	1287	protein_coding	- && PF00275:EPSP synthase (3-phosphoshikimate 1-carboxyvinyltransferase)	EPSP_synthase	886	1401	1289	1439	290	514	410	471	173.374	205.957	167.745	176.85	49.3204	82.3462	55.8848	77.6511
gene:GYO_4092	667.221	553.467	661.412	609.775	244.701	322.781	310.537	274.318	1.11083	4.53055e-11	1.04818e-09	-	Chromosome	3796968	3797489	+	522	protein_coding	- && PF10740:Domain of unknown function (DUF2529)	-	494	563	769	751	212	309	358	259	238.334	204.058	246.735	227.558	88.894	122.053	120.31	105.277
gene:GYO_1750	62.1299	66.8485	62.7868	144.527	2.3085	12.5352	6.93936	7.414	3.52076	4.8346e-11	1.11248e-09	-	Chromosome	1590406	1590882	+	477	protein_coding	- && PF00258:Flavodoxin	-	46	68	73	178	2	12	8	7	24.2867	26.9716	25.6318	59.0233	0.917738	5.18707	2.94212	3.11376
gene:GYO_0082	26656.4	28579.7	24564.3	21854.5	12794.9	13946.4	13739.9	13552.8	0.911691	5.32265e-11	1.2182e-09	-	Chromosome	77060	78973	+	1914	protein_coding	- && PF01434:Peptidase family M41|PF06480:FtsH Extracellular|PF00004:ATPase family associated with various cellular activities (AAA)	AAA	19736	29072	28560	26916	11085	13351	15840	12796	2596.85	2873.75	2499.14	2224.28	1267.65	1438.24	1451.78	1418.53
gene:GYO_0530	239.065	312.615	280.391	322.345	117.734	119.084	110.162	137.689	1.25628	5.39871e-11	1.229e-09	-	Chromosome	463071	463928	-	858	protein_coding	- && PF09323:Domain of unknown function (DUF1980)	-	177	318	326	397	102	114	127	130	51.9536	70.1223	63.6364	73.1855	26.0208	27.3953	25.966	32.1485
gene:GYO_2066	39.1688	14.746	18.9221	20.2988	124.659	106.549	93.6814	103.796	-2.23491	5.48597e-11	1.24222e-09	-	Chromosome	1888980	1889954	+	975	protein_coding	- && PF00698:Acyl transferase domain	Acyl_transf_1	29	15	22	25	108	102	108	98	7.49071	2.91074	3.77914	4.05562	24.2452	21.5702	19.4315	21.3269
gene:GYO_1961	8014.76	7009.27	6381.04	8301.39	14242.3	16946.5	14117.3	15367.1	-1.03033	5.71666e-11	1.28761e-09	-	Chromosome	1784016	1785173	+	1158	protein_coding	- && PF08442:ATP-grasp domain|PF00549:CoA-ligase	-	5934	7130	7419	10224	12339	16223	16275	14509	1290.53	1164.92	1073.03	1396.48	2332.27	2888.56	2465.48	2658.48
gene:GYO_1792	846.857	878.862	744.841	855.797	473.243	390.68	356.51	397.179	1.04122	6.23554e-11	1.39709e-09	-	Chromosome	1628772	1629545	+	774	protein_coding	- && PF08282:haloacid dehalogenase-like hydrolase	Hydrolase_3	627	894	866	1054	410	374	411	375	204.012	218.531	187.392	215.388	115.944	99.6299	93.1513	102.801
gene:GYO_0599	9912.42	5520.9	6486.83	8382.59	1199.27	2392.13	1361.85	2075.92	2.10798	6.5398e-11	1.45759e-09	-	Chromosome	551417	552373	+	957	protein_coding	- && PF01497:Periplasmic binding protein	Peripla_BP_2	7339	5616	7542	10324	1039	2290	1570	1960	1931.32	1110.28	1319.93	1706.31	237.635	493.381	287.79	434.56
gene:GYO_0762	274.182	444.346	439.508	440.89	109.654	154.601	133.583	109.092	1.65828	6.60683e-11	1.46486e-09	arsC	Chromosome	692482	692901	+	420	protein_coding	- && PF01451:Low molecular weight phosphotyrosine protein phosphatase	LMWPc	203	452	511	543	95	148	154	103	121.724	203.613	203.773	204.49	49.5087	72.656	64.322	52.0347
gene:GYO_3210	1319.58	1236.7	834.291	784.345	387.828	335.316	317.476	330.453	1.60593	6.76675e-11	1.49254e-09	-	Chromosome	2970153	2970644	+	492	protein_coding	- && PF13185:GAF domain	-	977	1258	970	966	336	321	366	312	500.102	483.762	330.203	310.552	149.479	134.524	130.498	134.553
gene:GYO_3998	185.039	119.934	318.235	259.824	1705.98	803.296	1289.85	1121.63	-2.4766	6.83761e-11	1.5004e-09	-	Chromosome	3713551	3719493	-	5943	protein_coding	- && PF05738:Cna protein B-type domain|PF05737:Collagen binding domain	-	137	122	370	320	1478	769	1487	1059	5.80556	3.88392	10.4273	8.51659	54.4347	26.6796	43.8928	37.809
gene:GYO_3214	2.7013	1.96613	12.0413	8.93147	56.5583	66.8543	119.704	78.3766	-3.5959	7.10583e-11	1.55126e-09	-	Chromosome	2973340	2973468	-	129	protein_coding	- && -	-	2	2	14	11	49	64	138	74	3.90454	2.9333	18.1766	13.4873	83.1407	102.294	187.663	121.716
gene:GYO_1440	64.8312	42.2719	122.133	69.8278	496.328	452.311	463.203	266.904	-2.48509	7.8648e-11	1.70819e-09	-	Chromosome	1321390	1322376	+	987	protein_coding	- && PF08352:Oligopeptide/dipeptide transporter, C-terminal region|PF00005:ABC transporter|PF07673:Protein of unknown function (DUF1602)	ABC_tran	48	43	142	86	430	433	534	252	12.2477	8.24267	24.0961	13.7817	95.3583	90.4544	94.9101	54.1737
gene:GYO_1109	79.6883	230.038	176.319	125.041	20.7765	11.4906	17.3484	30.7152	2.93253	8.36473e-11	1.80755e-09	-	Chromosome	1025949	1027505	-	1557	protein_coding	- && PF07690:Major Facilitator Superfamily	MFS_1	59	234	205	154	18	11	20	29	9.54317	28.4344	22.0516	15.6442	2.53041	1.45668	2.25335	3.95198
gene:GYO_3126	54.026	86.5099	78.2685	88.5027	390.137	323.825	216.855	237.248	-1.91814	8.86879e-11	1.90679e-09	-	Chromosome	2890858	2892042	-	1185	protein_coding	- && PF13685:Iron-containing alcohol dehydrogenase	-	40	88	91	109	338	310	250	224	8.50102	14.0501	12.8617	14.5489	62.4318	53.9389	37.0092	40.1084
gene:GYO_0862	572.676	359.802	559.061	458.753	1079.22	1494.82	1435.58	1542.11	-1.51017	9.28583e-11	1.98642e-09	tatAy	Chromosome	776708	776881	+	174	protein_coding	- && PF02416:mttA/Hcf106 family	-	424	366	650	565	935	1431	1655	1456	613.686	397.968	625.661	513.595	1176.17	1695.7	1668.54	1775.49
gene:GYO_1112	1458.7	1818.67	982.227	1683.99	153.515	400.081	280.177	354.813	2.32168	9.33931e-11	1.98787e-09	-	Chromosome	1030861	1031838	-	978	protein_coding	- && PF01497:Periplasmic binding protein	Peripla_BP_2	1080	1850	1142	2074	133	383	323	335	278.109	357.89	195.57	335.422	29.766	80.7456	57.9364	72.6794
gene:GYO_2367	1364.16	1377.28	1259.18	1328.35	652.152	564.083	649.698	782.707	1.00851	9.89583e-11	2.09585e-09	-	Chromosome	2235489	2236310	-	822	protein_coding	- && PF02557:D-alanyl-D-alanine carboxypeptidase	-	1010	1401	1464	1636	565	540	749	739	309.442	322.465	298.294	314.799	150.447	135.451	159.845	190.756
gene:GYO_1751	90.4935	87.4929	91.1699	163.202	2.3085	12.5352	15.6136	16.9463	3.17621	1.16772e-10	2.46088e-09	-	Chromosome	1590872	1591765	+	894	protein_coding	- && -	-	67	89	106	201	2	12	18	16	18.8741	18.8351	19.8584	35.5615	0.489666	2.7676	3.53202	3.79741
gene:GYO_3918	2559.48	2016.27	1931.77	2088.34	1067.68	909.845	757.258	729.75	1.31108	1.17706e-10	2.46836e-09	-	Chromosome	3630619	3631284	+	666	protein_coding	- && PF03816:Cell envelope-related transcriptional attenuator domain	-	1895	2051	2246	2572	925	871	873	689	716.579	582.65	564.821	610.827	304.001	269.652	229.947	219.508
gene:GYO_0907	125.61	85.5268	98.9108	146.151	629.067	292.488	471.877	468.141	-2.0286	1.27832e-10	2.66756e-09	purQ	Chromosome	821310	821993	+	684	protein_coding	- && PF13507:CobB/CobQ-like glutamine amidotransferase domain	-	93	87	115	180	545	280	544	442	34.2418	24.0647	28.159	41.6235	174.4	84.4036	139.518	137.111
gene:GYO_3815	2020.57	1788.2	2045.3	1506.17	940.715	833.589	899.515	910.863	1.03757	1.5369e-10	3.1915e-09	trxB	Chromosome	3530263	3531213	-	951	protein_coding	- && PF07992:Pyridine nucleotide-disulphide oxidoreductase	Pyr_redox_2	1496	1819	2378	1855	815	798	1037	860	396.169	361.883	418.8	308.521	187.579	173.014	191.287	191.877
gene:GYO_1989	2252.88	1277	1555.91	1683.99	5652.37	4734.12	4867.1	4061.81	-1.51307	1.59886e-10	3.30405e-09	fliZ	Chromosome	1807801	1808460	+	660	protein_coding	- && PF04347:Flagellar biosynthesis protein, FliO	-	1668	1299	1809	2074	4897	4532	5611	3835	636.475	372.376	459.06	497.035	1624.03	1415.81	1491.37	1232.9
gene:GYO_3695	297.143	19.6613	54.1859	56.0246	4695.49	2293.94	1888.37	2228.44	-4.70603	1.67898e-10	3.45286e-09	-	Chromosome	3416102	3417946	-	1845	protein_coding	- && PF00005:ABC transporter	ABC_tran	220	20	63	69	4068	2196	2177	2104	30.03	2.05093	5.71899	5.91527	482.605	245.412	206.99	241.966
gene:GYO_0863	2373.09	1648.6	2310.21	1851.25	4114.91	5041.23	4812.45	5062.7	-1.21798	1.69696e-10	3.47305e-09	tatCy	Chromosome	776897	777652	+	756	protein_coding	- && PF00902:Sec-independent protein translocase protein (TatC)	-	1757	1677	2686	2280	3565	4826	5548	4780	585.301	419.689	595.058	477.018	1032.16	1316.21	1287.37	1341.56
Novel00222	39.1688	23.5936	36.1239	25.1705	137.356	119.084	107.56	87.9089	-1.87611	1.73896e-10	3.54198e-09	-	Chromosome	1578622	1578978	+	357	-	PF00155:Aminotransferase class I and II	Aminotran_1_2	29	24	42	31	119	114	124	83	20.4578	12.7192	19.7041	13.7346	72.9602	65.8409	60.9315	49.3305
gene:GYO_3129	32.4156	52.1025	58.4864	55.2127	238.93	183.849	140.522	165.226	-1.86295	1.7498e-10	3.54709e-09	araB	Chromosome	2893538	2895223	-	1686	protein_coding	- && PF02782:FGGY family of carbohydrate kinases, C-terminal domain|PF00370:FGGY family of carbohydrate kinases, N-terminal domain	FGGY_N	24	53	68	68	207	176	162	156	3.58495	5.94751	6.75502	6.3793	26.8732	21.5236	16.8557	19.6324
gene:GYO_1784	5886.13	4385.46	3031.83	3644.85	475.551	743.754	477.081	1245.55	2.52629	1.78536e-10	3.60204e-09	abh	Chromosome	1621213	1621527	+	315	protein_coding	- && PF04014:Antidote-toxin recognition MazE, bacterial antitoxin	SpoVT_AbrB	4358	4461	3525	4489	412	712	550	1176	3484.22	2679.4	1874.23	2254.04	286.282	466.046	306.295	792.14
gene:GYO_4123	36.4675	7.86453	38.7042	29.2302	319.728	179.671	187.363	189.587	-2.96678	1.89307e-10	3.80131e-09	-	Chromosome	3829611	3830312	+	702	protein_coding	- && -	-	27	8	45	36	277	172	216	179	9.68626	2.1561	10.7362	8.11124	86.3674	50.5185	53.9765	54.103
gene:GYO_0574	964.364	805.132	1060.5	756.739	368.206	404.26	378.195	442.722	1.17024	1.9298e-10	3.85688e-09	-	Chromosome	525757	526500	-	744	protein_coding	- && PF00005:ABC transporter|PF07673:Protein of unknown function (DUF1602)	ABC_tran	714	819	1233	932	319	387	436	418	241.688	208.27	277.565	198.137	93.848	107.25	102.802	119.209
gene:GYO_3162	276.883	187.766	175.459	171.322	549.424	584.975	477.949	540.163	-1.41349	2.14466e-10	4.25685e-09	phoP	Chromosome	2925933	2926655	-	723	protein_coding	- && PF00072:Response regulator receiver domain|PF00486:Transcriptional regulatory protein, C terminal	Response_reg	205	191	204	211	476	560	551	510	71.4077	49.9818	47.2571	46.16	144.104	159.701	133.691	149.671
gene:GYO_2527	1861.2	1686.94	1678.9	1444.46	943.023	814.787	734.705	766.82	1.03346	2.14993e-10	4.25685e-09	-	Chromosome	2367559	2368533	-	975	protein_coding	- && PF07992:Pyridine nucleotide-disulphide oxidoreductase	Pyr_redox_2	1378	1716	1952	1779	817	780	847	724	355.938	332.988	335.313	288.598	183.411	164.949	152.394	157.558
gene:GYO_3719	17573.3	4973.34	15571.1	10309.3	2105.35	1727.77	2567.56	1760.3	2.56892	2.20281e-10	4.34137e-09	cggR	Chromosome	3439696	3440718	-	1023	protein_coding	- && PF04198:Putative sugar-binding domain	Sugar-bind	13011	5059	18104	12697	1824	1654	2960	1662	3203.06	935.633	2963.97	1963.12	390.262	333.364	507.58	344.715
gene:GYO_3640	287.688	468.923	281.251	390.549	50.7871	88.7908	85.0072	116.506	2.06531	2.26946e-10	4.45211e-09	-	Chromosome	3364826	3365872	-	1047	protein_coding	- && PF01032:FecCD transport family	-	213	477	327	481	44	85	98	110	51.2345	86.1962	52.309	72.6641	9.19842	16.7391	16.4198	22.2921
gene:GYO_2968	451.117	229.055	590.024	185.125	69.2551	52.2299	31.2271	39.1883	2.92622	2.44481e-10	4.77411e-09	-	Chromosome	2736634	2737275	-	642	protein_coding	- && PF08241:Methyltransferase domain	Methyltransf_11	334	233	686	228	60	50	36	37	131.021	68.6653	178.963	56.1722	20.4561	16.0581	9.83684	12.2285
gene:GYO_1214	898.182	623.264	893.637	841.182	1642.5	2467.34	2111.3	2181.84	-1.36797	2.51748e-10	4.89357e-09	-	Chromosome	1111234	1112571	+	1338	protein_coding	- && PF00202:Aminotransferase class-III	Aminotran_3	665	634	1039	1036	1423	2362	2434	2060	125.168	89.6499	130.057	122.469	232.786	363.984	319.119	326.675
gene:GYO_1048	1514.08	1201.31	987.388	1277.2	472.089	466.935	516.115	599.475	1.27639	2.57657e-10	4.98567e-09	-	Chromosome	966639	967304	+	666	protein_coding	- && PF00881:Nitroreductase family	Nitroreductase	1121	1222	1148	1573	409	447	595	566	423.897	347.147	288.697	373.574	134.418	138.386	156.722	180.321
gene:GYO_3118	565.922	466.957	384.462	433.582	907.241	1179.35	1086.01	1103.63	-1.21071	2.87042e-10	5.52913e-09	-	Chromosome	2882355	2884151	-	1797	protein_coding	- && PF02554:Carbon starvation protein CstA|PF13722:5TM C-terminal transporter carbon starvation CstA	-	419	475	447	534	786	1129	1252	1042	58.7213	50.0106	41.6615	47.0018	95.7374	129.54	122.221	123.034
gene:GYO_2630	6957.2	6698.62	5367.84	5180.25	2144.6	2967.7	2760.13	2400.02	1.23619	3.16402e-10	6.06723e-09	zwf	Chromosome	2448115	2449584	+	1470	protein_coding	- && PF02781:Glucose-6-phosphate dehydrogenase, C-terminal domain|PF00479:Glucose-6-phosphate dehydrogenase, NAD binding domain	G6PD_C	5151	6814	6241	6380	1858	2841	3182	2266	882.477	877.003	711.069	686.476	276.653	398.486	379.727	327.075
gene:GYO_1719	2324.47	2250.24	2084.01	1908.09	1058.45	1254.56	1063.46	1203.19	0.903143	3.425e-10	6.53821e-09	-	Chromosome	1560386	1561480	+	1095	protein_coding	- && PF00557:Metallopeptidase family M24|PF01321:Creatinase/Prolidase N-terminal domain	Peptidase_M24	1721	2289	2423	2350	917	1201	1226	1136	395.819	395.502	370.608	339.45	183.3	226.145	196.41	220.125
gene:GYO_3491	217.455	115.019	145.356	140.468	11.5425	31.3379	14.7461	37.07	2.70617	3.52562e-10	6.70025e-09	-	Chromosome	3233524	3234309	-	786	protein_coding	- && PF00106:short chain dehydrogenase	adh_short	161	117	169	173	10	30	17	35	51.5861	28.1631	36.0113	34.8133	2.78474	7.86969	3.79415	9.44824
Novel00456	60.7792	27.5259	22.3624	20.2988	2295.81	529.611	152.666	466.023	-4.7248	3.81491e-10	7.21781e-09	-	Chromosome	2914530	2916208	+	1679	-	PF02800:Glyceraldehyde 3-phosphate dehydrogenase, C-terminal domain|PF00044:Glyceraldehyde 3-phosphate dehydrogenase, NAD binding domain|PF02675:S-adenosylmethionine decarboxylase	-	45	28	26	25	1989	507	176	440	6.7498	3.15518	2.59357	2.35511	259.293	62.261	18.3887	55.6042
gene:GYO_3092	2844.47	1319.28	1868.98	1892.66	662.54	635.116	561.221	614.303	1.67985	4.41889e-10	8.32355e-09	-	Chromosome	2854982	2855428	+	447	protein_coding	- && PF10702:Protein of unknown function (DUF2507)	-	2106	1342	2173	2331	574	608	647	580	1186.53	568.017	814.193	824.815	281.068	280.45	253.913	275.312
gene:GYO_3875	255.273	258.547	152.237	218.415	758.343	607.956	534.331	634.427	-1.52131	4.64602e-10	8.71283e-09	-	Chromosome	3591150	3591527	-	378	protein_coding	- && -	-	189	263	177	269	657	582	616	599	125.921	131.638	78.4253	112.56	380.435	317.461	285.876	336.233
gene:GYO_3721	124.26	86.5099	181.48	141.28	545.961	426.196	417.229	389.765	-1.73441	5.68476e-10	1.06141e-08	-	Chromosome	3441019	3442413	-	1395	protein_coding	- && PF00083:Sugar (and other) transporter	Sugar_tr	92	88	211	174	473	408	481	368	16.609	11.9351	25.3328	19.7286	74.2154	60.3038	60.4866	55.973
gene:GYO_1757	71.5844	84.5437	87.7296	90.1266	169.675	254.882	279.309	224.538	-1.47185	5.8354e-10	1.08111e-08	ykuU	Chromosome	1595636	1596178	+	543	protein_coding	- && PF00578:AhpC/TSA family	-	53	86	102	111	147	244	322	212	24.5813	29.9651	31.4612	32.3329	59.255	92.6508	104.027	82.8402
gene:GYO_1985	375.481	364.718	320.815	369.438	2489.72	1250.38	1032.23	1142.82	-2.04789	5.84112e-10	1.08111e-08	fliL	Chromosome	1804815	1805240	+	426	protein_coding	- && PF03748:Flagellar basal body-associated protein FliL	-	278	371	373	455	2157	1197	1190	1079	164.348	164.771	146.647	168.937	1108.28	579.353	490.033	537.424
gene:GYO_2560	121.558	78.6453	121.273	138.032	427.073	266.373	380.798	366.464	-1.64749	6.06694e-10	1.11805e-08	ribE	Chromosome	2396192	2396839	-	648	protein_coding	- && PF00677:Lumazine binding domain	-	90	80	141	170	370	255	439	346	34.9782	23.3578	36.4434	41.495	124.978	81.138	118.844	113.294
gene:GYO_2650	5132.47	4049.25	4983.38	5304.48	9135.9	10183.8	8659.46	10577.7	-0.985748	6.60171e-10	1.21136e-08	-	Chromosome	2468030	2469022	-	993	protein_coding	- && PF00676:Dehydrogenase E1 component	-	3800	4119	5794	6533	7915	9749	9983	9987	963.749	784.8	977.247	1040.6	1744.65	2024.28	1763.6	2133.98
gene:GYO_1272	5000.11	3956.84	3036.13	3645.66	1830.64	1414.39	1420.83	1474.33	1.34866	6.79287e-10	1.24108e-08	-	Chromosome	1167849	1168202	+	354	protein_coding	- && PF06133:Control of competence regulator ComK, YlbF/YmcA	-	3702	4025	3530	4490	1586	1354	1638	1392	2633.68	2151.19	1670.12	2006.16	980.634	788.632	811.706	834.337
gene:GYO_1679	329.559	151.392	217.604	206.236	809.13	876.418	781.546	610.066	-1.76961	6.96777e-10	1.2676e-08	kinE	Chromosome	1527939	1530155	+	2217	protein_coding	- && PF00512:His Kinase A (phospho-acceptor) domain|PF13188:PAS domain|PF02518:Histidine kinase-, DNA gyrase B-, and HSP90-like ATPase	HATPase_c	244	154	253	254	701	839	901	576	27.7175	13.1423	19.113	18.1213	69.2085	78.0289	71.2931	55.1267
gene:GYO_4096	75.6364	117.968	153.957	80.3832	318.573	448.133	380.798	562.405	-1.99476	9.01783e-10	1.62868e-08	-	Chromosome	3800124	3801263	-	1140	protein_coding	- && PF02771:Acyl-CoA dehydrogenase, N-terminal domain|PF02770:Acyl-CoA dehydrogenase, middle domain|PF00441:Acyl-CoA dehydrogenase, C-terminal domain	-	56	120	179	99	276	429	439	531	12.3712	19.9156	26.298	13.7357	52.9921	77.591	67.5535	98.8314
Novel00629	2.7013	0	2.58028	3.24781	181.217	58.4975	66.7914	20.1237	-5.24996	9.02911e-10	1.62868e-08	-	Chromosome	3933299	3934101	+	803	-	PF01501:Glycosyl transferase family 8	Glyco_transf_8	2	0	3	4	157	56	77	19	0.627255	0	0.625721	0.787891	42.7948	14.3791	16.8214	5.02046
gene:GYO_1982	859.013	640.96	620.988	786.781	2294.65	1741.35	1624.68	1574.95	-1.31578	9.9732e-10	1.79139e-08	-	Chromosome	1803325	1803747	+	423	protein_coding	- && PF03963:Flagellar hook capping protein - N-terminal region	-	636	652	722	969	1988	1667	1873	1487	378.657	291.624	285.872	362.331	1028.69	812.558	776.758	745.892
gene:GYO_3632	2.7013	0	5.16056	2.43585	17.3138	69.9881	118.837	123.92	-4.98624	1.10925e-09	1.98407e-08	-	Chromosome	3357792	3357947	+	156	protein_coding	- && PF12841:YvrJ protein family	-	2	0	6	3	15	67	137	117	3.22875	0	6.44172	3.04171	21.0462	88.5542	154.058	159.135
gene:GYO_3586	94.5455	221.19	470.471	245.209	1366.63	1848.94	1641.16	2066.39	-2.74452	1.28518e-09	2.28912e-08	-	Chromosome	3317372	3319741	-	2370	protein_coding	- && PF02737:3-hydroxyacyl-CoA dehydrogenase, NAD binding domain|PF00378:Enoyl-CoA hydratase/isomerase|PF00725:3-hydroxyacyl-CoA dehydrogenase, C-terminal domain	3HCDH_N	70	225	547	302	1184	1770	1892	1951	7.43839	17.9618	38.6557	20.1549	109.348	153.987	140.043	174.668
gene:GYO_0430	530.805	251.665	442.088	370.25	1110.39	2856.98	2044.51	1594.01	-2.25463	1.29967e-09	2.30529e-08	-	Chromosome	363822	365159	+	1338	protein_coding	- && PF05139:Erythromycin esterase	-	393	256	514	456	962	2735	2357	1505	73.9717	36.1993	64.3401	53.9052	157.372	421.464	309.024	238.663
gene:GYO_0576	668.572	951.609	952.984	642.254	361.281	235.035	244.613	270.082	1.53461	1.3503e-09	2.38515e-08	-	Chromosome	527205	528011	-	807	protein_coding	- && PF00497:Bacterial extracellular solute-binding proteins, family 3	-	495	968	1108	791	313	225	282	255	154.476	226.944	229.954	155.033	84.8942	57.4868	61.3005	67.0459
gene:GYO_2327	807.689	1408.73	760.323	954.043	253.935	352.03	334.824	228.775	1.74834	1.39648e-09	2.45653e-08	-	Chromosome	2198950	2199576	-	627	protein_coding	- && PF02525:Flavodoxin-like fold	Flavodoxin_2	598	1433	884	1175	220	337	386	216	240.194	432.409	236.135	296.409	76.8002	110.821	107.996	73.0956
gene:GYO_3400	2647.27	3009.17	2098.63	2439.91	1139.25	1344.4	1039.17	1202.13	1.10947	1.43903e-09	2.52096e-08	-	Chromosome	3138103	3139089	+	987	protein_coding	- && PF01408:Oxidoreductase family, NAD-binding Rossmann fold	GFO_IDH_MocA	1960	3061	2440	3005	987	1287	1198	1135	500.113	586.763	414.045	481.559	218.881	268.856	212.926	243.997
gene:GYO_1523	75.6364	26.5428	125.574	110.425	504.408	864.927	1190.97	446.958	-3.15045	1.45593e-09	2.54012e-08	-	Chromosome	1390590	1393547	+	2958	protein_coding	- && PF12838:4Fe-4S dicluster domain|PF00384:Molybdopterin oxidoreductase|PF04879:Molybdopterin oxidoreductase Fe4S4 domain|PF13510:2Fe-2S iron-sulfur cluster binding domain|PF10588:NADH-ubiquinone oxidoreductase-G iron-sulfur binding region|PF01568:Molyd	-	56	27	146	136	437	828	1373	422	4.76781	1.72696	8.26665	7.27214	32.3363	57.7153	81.4255	30.2705
gene:GYO_0956	48.6234	33.4243	24.0826	30.0422	137.356	173.403	99.7534	114.387	-1.9647	1.47318e-09	2.55973e-08	yesM	Chromosome	873452	874558	+	1107	protein_coding	- && PF00072:Response regulator receiver domain|PF12833:Helix-turn-helix domain	Response_reg	36	34	28	37	119	166	115	108	8.19001	5.81096	4.23629	5.28659	23.5292	30.9186	18.2238	20.7005
Novel00197	72.9351	53.0856	98.0507	71.4517	484.786	170.27	589.846	718.099	-2.73088	1.63892e-09	2.83614e-08	-	Chromosome	1366584	1367975	+	1392	-	PF13673:Acetyltransferase (GNAT) domain|PF13563:2'-5' RNA ligase superfamily|PF00756:Putative esterase	-	54	54	114	88	420	163	680	678	9.76976	7.33958	13.7164	9.9992	66.0416	24.1439	85.6955	103.346
gene:GYO_2641	131.013	271.326	137.615	144.527	35.7818	29.2488	45.1059	46.6023	2.12488	1.68095e-09	2.89709e-08	-	Chromosome	2459536	2460258	-	723	protein_coding	- && PF07673:Protein of unknown function (DUF1602)|PF00005:ABC transporter	ABC_tran	97	276	160	178	31	28	52	44	33.788	72.225	37.0644	38.9407	9.38492	7.98507	12.6169	12.9128
gene:GYO_0975	429.507	1231.78	595.185	816.823	39.2445	131.619	93.6814	147.221	2.8995	1.8078e-09	3.10315e-08	-	Chromosome	898109	898432	-	324	protein_coding	- && PF03992:Antibiotic biosynthesis monooxygenase	ABM	318	1253	692	1006	34	126	108	139	247.179	731.682	357.714	491.105	22.9689	80.1834	58.4746	91.028
gene:GYO_3639	332.26	406.99	418.866	522.897	62.3296	133.709	104.958	147.221	1.90711	1.92883e-09	3.2976e-08	-	Chromosome	3363816	3364826	-	1011	protein_coding	- && PF01032:FecCD transport family	-	246	414	487	644	54	128	121	139	61.2792	77.4757	80.6776	100.753	11.691	26.1046	20.9953	29.1722
gene:GYO_0685	760.416	799.233	676.894	703.15	371.669	403.215	399.013	450.136	0.855122	2.2239e-09	3.78686e-08	alr	Chromosome	634129	635298	+	1170	protein_coding	- && PF01168:Alanine racemase, N-terminal domain|PF00842:Alanine racemase, C-terminal domain	Ala_racemase_N	563	813	787	866	322	386	460	425	121.186	131.468	112.658	117.072	60.2389	68.0237	68.97	77.0741
gene:GYO_3123	37.8182	68.8147	40.4244	32.4781	250.473	241.302	158.738	137.689	-2.13375	2.32537e-09	3.93452e-08	-	Chromosome	2887703	2888548	-	846	protein_coding	- && PF00528:Binding-protein-dependent transport system inner membrane component	BPD_transp_1	28	70	47	40	217	231	183	130	8.33522	15.6547	9.3047	7.47845	56.1431	56.299	37.9463	32.6046
gene:GYO_1797	13507.8	32288.8	14410	20386.5	4231.48	5987.64	5353.72	4783.09	1.9852	2.3291e-09	3.93452e-08	pdhA	Chromosome	1631703	1632818	+	1116	protein_coding	- && PF00676:Dehydrogenase E1 component	-	10001	32845	16754	25108	3666	5732	6172	4516	2256.88	5568.29	2514.37	3558.52	719.011	1059.01	970.175	858.608
gene:GYO_1517	29.7143	31.4581	17.2019	20.2988	63.4838	133.709	133.583	126.038	-2.22674	2.39496e-09	4.02977e-08	-	Chromosome	1388165	1388332	-	168	protein_coding	- && PF14070:Putative motility protein	-	22	32	20	25	55	128	154	119	32.9794	36.0377	19.9386	23.5371	71.6573	157.094	160.805	150.294
gene:GYO_1932	45240	19999.5	12473.9	24361.8	5132.96	4195.11	4821.12	5614.52	2.36868	2.40561e-09	4.03177e-08	rpmB	Chromosome	1759179	1759367	-	189	protein_coding	- && PF00830:Ribosomal L28 family	-	33495	20344	14503	30004	4447	4016	5558	5301	44632.1	20365.3	12852	25109.6	5150.06	4381.18	5158.76	5951.16
gene:GYO_0627	328.208	221.19	310.494	345.079	137.356	99.2368	88.4769	85.7906	1.55524	2.47977e-09	4.13975e-08	-	Chromosome	576196	577209	+	1014	protein_coding	- && PF02626:Allophanate hydrolase subunit 2	-	243	225	361	425	119	95	102	81	60.3528	41.9818	59.6272	66.2938	25.6872	19.3172	17.6462	16.9493
gene:GYO_0423	194.494	106.171	127.294	94.1864	394.754	505.586	359.979	464.964	-1.7316	2.53873e-09	4.20945e-08	-	Chromosome	359032	359970	+	939	protein_coding	- && PF00089:Trypsin	Trypsin	144	108	148	116	342	484	415	439	38.6212	21.7608	26.398	19.5395	79.7201	106.277	77.5302	99.1983
gene:GYO_1141	3263.17	2340.68	2735.96	2219.88	1281.22	1214.87	1036.57	1248.73	1.14291	2.5413e-09	4.20945e-08	perR	Chromosome	1055996	1056433	+	438	protein_coding	- && PF01475:Ferric uptake regulator family	FUR	2416	2381	3181	2734	1110	1163	1195	1179	1389.16	1028.49	1216.37	987.293	554.697	547.475	478.61	571.143
gene:GYO_1798	17523.3	26917.4	15124.7	24528.2	8097.07	7894.03	6423.25	7888.5	1.47259	2.56847e-09	4.23798e-08	-	Chromosome	1632822	1633799	+	978	protein_coding	- && PF02780:Transketolase, C-terminal domain|PF02779:Transketolase, pyrimidine binding domain	-	12974	27381	17585	30209	7015	7557	7405	7448	3340.91	5296.96	3011.47	4885.61	1569.99	1593.2	1328.23	1615.87
gene:GYO_3608	402.494	456.143	350.058	279.311	144.281	165.047	136.185	148.28	1.32422	2.64134e-09	4.33931e-08	-	Chromosome	3335513	3336388	+	876	protein_coding	- && PF00440:Bacterial regulatory proteins, tetR family	TetR_N	298	464	407	344	125	158	157	140	85.6725	100.214	77.8154	62.1121	31.233	37.1888	31.4401	33.9101
gene:GYO_1727	144.52	175.969	209.863	226.534	69.2551	60.5867	67.6588	82.6132	1.43957	2.65027e-09	4.33931e-08	splB	Chromosome	1568470	1569498	+	1029	protein_coding	- && -	-	107	179	244	279	60	58	78	78	26.1877	32.912	39.7145	42.8855	12.7627	11.6218	13.2974	16.0836
gene:GYO_0650	934.65	1482.46	1380.45	1273.95	317.419	315.469	482.286	523.217	1.62994	2.7022e-09	4.40738e-08	-	Chromosome	602050	603873	+	1824	protein_coding	- && PF13520:Amino acid permease	-	692	1508	1605	1569	275	302	556	494	95.5456	156.42	147.375	136.057	33.0001	34.1382	53.4734	57.4655
Novel00081	94.5455	85.5268	194.381	213.543	1020.36	484.694	724.296	1025.25	-2.46486	2.82298e-09	4.58574e-08	-	Chromosome	635681	636511	-	831	-	PF02452:PemK-like, MazF-like toxin of type II toxin-antitoxin system|PF08678:Rsbr N terminal	-	70	87	226	263	884	464	835	968	21.2142	19.8077	45.5494	50.0583	232.84	115.127	176.268	247.161
gene:GYO_3876	691.533	552.484	380.161	544.007	1573.24	1485.42	1197.91	1443.61	-1.39603	2.8331e-09	4.58574e-08	fliT	Chromosome	3591537	3591839	-	303	protein_coding	- && -	-	512	562	442	670	1363	1422	1381	1363	425.556	350.922	244.318	349.747	984.601	967.645	799.538	954.462
gene:GYO_2453	239.065	347.023	245.127	237.09	109.654	60.5867	47.7081	54.0163	1.97948	2.92142e-09	4.71079e-08	-	Chromosome	2305356	2305727	-	372	protein_coding	- && PF08807:Bacterial domain of unknown function (DUF1798)	-	177	353	285	292	95	58	55	51	119.828	179.535	128.315	124.154	55.8969	32.1473	25.9363	29.0892
gene:GYO_2130	232.312	101.256	249.427	159.142	522.876	837.768	967.174	910.863	-2.12705	2.93741e-09	4.7187e-08	-	Chromosome	2004895	2005614	-	720	protein_coding	- && PF15493:Domain of unknown function, YrpD	-	172	103	290	196	453	802	1115	860	60.1624	27.0658	67.4591	43.0572	137.712	229.668	271.663	253.438
gene:GYO_1611	171.533	61.9332	111.812	127.476	558.658	404.26	452.793	417.302	-1.95925	3.07471e-09	4.92069e-08	-	Chromosome	1467327	1468151	+	825	protein_coding	- && PF04951:D-aminopeptidase	-	127	63	130	157	484	387	522	394	38.7685	14.4478	26.3915	30.1001	128.41	96.7199	110.995	101.332
gene:GYO_2151	748.26	361.769	554.76	473.368	1856.04	1419.61	1641.16	1495.51	-1.586	3.35072e-09	5.34233e-08	-	Chromosome	2020080	2020508	+	429	protein_coding	- && -	-	554	368	645	583	1608	1359	1892	1412	325.223	162.296	251.813	214.948	820.419	653.162	773.663	698.365
gene:GYO_2717	293.091	160.24	256.308	239.526	786.045	761.512	564.691	597.357	-1.51468	3.47818e-09	5.52485e-08	gcvT	Chromosome	2528905	2529993	-	1089	protein_coding	- && PF01571:Aminomethyltransferase folate-binding domain|PF08669:Glycine cleavage T-protein C-terminal barrel domain	GCV_T	217	163	298	295	681	729	651	564	50.1835	28.3189	45.8314	42.8466	136.876	138.025	104.868	109.89
Novel00533	14.8571	4.91533	9.46103	12.1793	148.898	45.9623	72.8633	66.726	-3.02606	4.13883e-09	6.54982e-08	-	Chromosome	3358423	3359692	-	1270	-	PF00190:Cupin|PF14184:Regulatory protein YrvL	-	11	5	11	15	129	44	84	63	2.18131	0.744874	1.45065	1.86814	22.2328	7.14345	11.6028	10.5255
gene:GYO_0898	1310.13	2953.13	3971.91	2551.15	268.941	495.14	436.312	720.217	2.48964	4.23298e-09	6.674e-08	-	Chromosome	814935	815738	+	804	protein_coding	- && -	-	970	3004	4618	3142	233	474	503	680	303.84	706.904	961.995	618.119	63.4318	121.557	109.749	179.456
gene:GYO_1287	7055.79	8826.96	6278.68	4958.59	2215.01	3077.39	2503.38	2451.92	1.40396	4.41536e-09	6.93458e-08	-	Chromosome	1183471	1184325	-	855	protein_coding	- && PF13616:PPIC-type PPIASE domain	-	5224	8979	7300	6107	1919	2946	2886	2315	1538.74	1986.91	1429.99	1129.75	491.265	710.437	592.132	574.5
gene:GYO_0357	47.2727	46.2041	104.931	79.5712	228.542	271.596	264.563	259.49	-1.87163	4.43083e-09	6.93458e-08	-	Chromosome	299942	301186	-	1245	protein_coding	- && PF07075:Protein of unknown function (DUF1343)	-	35	47	122	98	198	260	305	245	7.07992	7.14241	16.4121	12.4503	34.8099	43.0589	42.9753	41.7544
gene:GYO_0394	89.1429	66.8485	63.6469	88.5027	174.292	261.15	231.601	183.232	-1.46908	4.54066e-09	7.08043e-08	-	Chromosome	333576	334760	+	1185	protein_coding	- && PF16226:Domain of unknown function (DUF4885)	-	66	68	74	109	151	250	267	173	14.0267	10.8569	10.459	14.5489	27.8911	43.4991	39.5258	30.9765
gene:GYO_2183	1219.64	1529.65	1192.09	1586.55	698.322	435.597	405.953	431.071	1.48895	4.68133e-09	7.27315e-08	-	Chromosome	2043868	2045367	+	1500	protein_coding	- && PF00942:Cellulose binding domain|PF00150:Cellulase (glycosyl hydrolase family 5)	-	903	1556	1386	1954	605	417	468	407	151.609	196.261	154.756	206.042	88.2818	57.3197	54.7322	57.5716
gene:GYO_0906	31.0649	34.4073	28.3831	33.29	198.531	89.8354	104.958	114.387	-1.99471	4.75562e-09	7.3617e-08	purS	Chromosome	821059	821313	+	255	protein_coding	- && PF02700:Phosphoribosylformylglycinamidine (FGAM) synthase	-	23	35	33	41	172	86	121	108	22.7152	25.9684	21.6745	25.4311	147.637	69.5372	83.2403	89.8646
gene:GYO_1858	1572.16	2220.75	1898.23	1528.09	813.747	789.716	896.913	890.739	1.09007	4.7903e-09	7.38851e-08	-	Chromosome	1681939	1683558	+	1620	protein_coding	- && PF10079:Uncharacterized protein conserved in bacteria (DUF2317)	-	1164	2259	2207	1882	705	756	1034	841	180.954	263.826	228.172	183.75	95.2536	96.2201	111.968	110.15
gene:GYO_2203	6.75325	2.9492	9.46103	3.24781	61.1753	78.3449	32.0946	37.07	-3.22551	4.8389e-09	7.43051e-08	-	Chromosome	2096329	2097528	-	1200	protein_coding	- && PF00698:Acyl transferase domain	Acyl_transf_1	5	3	11	4	53	75	37	35	1.04934	0.472995	1.53528	0.52723	9.66723	12.8866	5.4089	6.1886
gene:GYO_2071	12.1558	1.96613	12.0413	4.87171	73.8721	50.1407	50.3104	52.9572	-2.89956	4.85244e-09	7.43051e-08	-	Chromosome	1895055	1895825	+	771	protein_coding	- && PF00378:Enoyl-CoA hydratase/isomerase	ECH	9	2	14	6	64	48	58	50	2.9398	0.490786	3.04123	1.23089	18.1691	12.8365	13.1966	13.7601
gene:GYO_0905	151.273	101.256	141.915	191.621	622.141	369.788	414.627	462.846	-1.67172	5.11892e-09	7.81049e-08	purC	Chromosome	820341	821066	+	726	protein_coding	- && PF01259:SAICAR synthetase	-	112	103	165	236	539	354	478	437	38.8518	26.8421	38.0647	51.4159	162.502	100.537	115.499	127.717
Novel00486	9.45455	10.8137	17.2019	4.05976	515.95	132.664	45.9733	141.925	-4.33074	5.13969e-09	7.81416e-08	-	Chromosome	3068899	3069926	-	1028	-	PF01293:Phosphoenolpyruvate carboxykinase	-	7	11	20	5	447	127	53	134	1.71488	2.02449	3.25846	0.769305	95.1747	25.4724	9.04422	27.6578
gene:GYO_0545	398.442	826.759	608.086	645.501	213.536	170.27	233.336	199.119	1.60314	5.2149e-09	7.90029e-08	-	Chromosome	481341	482021	-	681	protein_coding	- && PF00528:Binding-protein-dependent transport system inner membrane component	BPD_transp_1	295	841	707	795	185	163	269	188	109.095	233.65	173.879	184.647	59.4609	49.3514	69.2936	58.5755
gene:GYO_1753	1708.57	2505.84	1399.37	2155.73	496.328	791.805	554.282	717.04	1.60207	5.68179e-09	8.57709e-08	-	Chromosome	1592342	1593052	+	711	protein_coding	- && PF14602:Hexapeptide repeat of succinyl-transferase|PF08503:Tetrahydrodipicolinate succinyltransferase N-terminal|PF00132:Bacterial transferase hexapeptide (six repeats)	Hexapep	1265	2549	1627	2655	430	758	639	677	448.075	678.292	383.26	590.632	132.375	219.816	157.659	202.034
gene:GYO_2344	283.636	142.545	331.996	214.355	31.1648	69.9881	29.4923	55.0754	2.38977	5.7259e-09	8.58433e-08	-	Chromosome	2218057	2219274	-	1218	protein_coding	- && PF00201:UDP-glucoronosyl and UDP-glucosyl transferase	UDPGT	210	145	386	264	27	67	34	52	43.4212	22.5236	53.0781	34.283	4.85203	11.3419	4.89688	9.05861
gene:GYO_2933	91.8442	58.984	42.1446	34.102	9.23401	8.35679	7.80678	3.17743	2.98012	5.72692e-09	8.58433e-08	-	Chromosome	2703144	2703548	-	405	protein_coding	- && PF13411:MerR HTH family regulatory protein	-	68	60	49	42	8	8	9	3	42.2847	28.0293	20.2636	16.4027	4.32357	4.07281	3.8983	1.57171
gene:GYO_3877	390.338	414.854	274.37	376.745	833.369	875.373	695.671	896.035	-1.18125	5.95095e-09	8.88884e-08	fliS	Chromosome	3591875	3592276	-	402	protein_coding	- && PF02561:Flagellar protein FliS	-	289	422	319	464	722	838	802	846	181.051	198.611	132.904	182.563	393.114	429.81	349.975	446.529
gene:GYO_3641	656.416	1211.14	793.866	1248.78	93.4943	253.837	143.992	263.727	2.37285	5.97995e-09	8.90092e-08	-	Chromosome	3366077	3367024	+	948	protein_coding	- && PF01497:Periplasmic binding protein	Peripla_BP_2	486	1232	923	1538	81	243	166	249	129.109	245.878	163.068	256.608	18.7018	52.8514	30.7176	55.7309
gene:GYO_2216	8957.51	3005.24	9001.74	7716.79	31452.2	34509.3	31984.4	26436.2	-2.11662	6.30704e-09	9.35507e-08	gltA	Chromosome	2110308	2114870	-	4563	protein_coding	- && PF01493:GXGXG motif|PF04898:Glutamate synthase central domain|PF01645:Conserved region in glutamate synthase|PF00310:Glutamine amidotransferases class-II	GATase_2	6632	3057	10466	9504	27249	33036	36873	24960	366.036	126.754	384.154	329.441	1307.1	1492.78	1417.58	1160.64
gene:GYO_2758	1489.77	1640.74	1152.53	1289.38	499.791	596.466	534.331	736.105	1.23513	7.0213e-09	1.03784e-07	-	Chromosome	2557296	2557649	+	354	protein_coding	- && -	-	1103	1669	1340	1588	433	571	616	695	784.696	892.01	633.981	709.527	267.727	332.577	305.257	416.569
gene:GYO_2340	1495.17	2211.9	1950.69	1804.97	809.13	620.491	792.822	939.46	1.23928	7.49929e-09	1.10465e-07	-	Chromosome	2212851	2214767	-	1917	protein_coding	- && PF00092:von Willebrand factor type A domain	VWA	1107	2250	2268	2223	701	594	914	887	145.43	222.063	198.151	183.417	80.0393	63.8886	83.6397	98.1763
gene:GYO_2649	4235.64	3249.04	3762.91	4433.25	7738.1	7673.62	6766.75	8265.55	-0.957157	7.59482e-09	1.11487e-07	-	Chromosome	2467033	2468016	-	984	protein_coding	- && PF02780:Transketolase, C-terminal domain|PF02779:Transketolase, pyrimidine binding domain	-	3136	3305	4375	5460	6704	7346	7801	7804	802.621	635.467	744.66	877.646	1491.24	1539.27	1390.73	1682.78
gene:GYO_2072	9.45455	3.93227	15.4817	4.87171	91.1858	47.0069	48.5755	68.8443	-2.92	7.82429e-09	1.1446e-07	-	Chromosome	1895867	1896616	+	750	protein_coding	- && PF00378:Enoyl-CoA hydratase/isomerase	ECH	7	4	18	6	79	45	56	65	2.35053	1.00906	4.01963	1.26535	23.0554	12.3712	13.0983	18.389
gene:GYO_3282	1501.92	828.725	504.015	598.408	212.382	173.403	126.643	188.527	2.29202	7.86933e-09	1.14725e-07	-	Chromosome	3041233	3041544	-	312	protein_coding	- && PF00581:Rhodanese-like domain	Rhodanese	1112	843	586	737	184	166	146	178	897.593	511.198	314.571	373.624	129.083	109.701	82.0893	121.052
gene:GYO_3012	1270.96	1796.06	1387.33	1304.81	731.795	732.263	707.815	625.954	1.04175	8.09489e-09	1.17611e-07	queA	Chromosome	2779660	2780688	-	1029	protein_coding	- && PF02547:Queuosine biosynthesis protein	-	941	1827	1613	1607	634	701	816	591	230.305	335.923	262.539	247.014	134.859	140.463	139.111	121.865
gene:GYO_1207	253.922	100.273	190.941	197.304	498.637	701.97	758.993	865.32	-1.93017	8.64335e-09	1.25152e-07	-	Chromosome	1105102	1105698	+	597	protein_coding	- && PF04203:Sortase family	-	188	102	222	243	432	672	875	817	79.3073	32.3253	62.2807	64.3804	158.386	232.089	257.112	290.371
gene:GYO_1087	62.1299	49.1533	120.413	94.9983	249.318	301.889	314.874	373.878	-1.91774	9.43359e-09	1.36132e-07	-	Chromosome	1004135	1004899	+	765	protein_coding	- && PF01380:SIS domain|PF01418:Helix-turn-helix domain, rpiR family	HTH_6	46	50	140	117	216	289	363	353	15.1435	12.3659	30.6508	24.1906	61.8016	77.8925	83.2403	97.9081
gene:GYO_1110	212.052	241.834	207.283	194.868	93.4943	104.46	81.5375	112.269	1.12947	9.70197e-09	1.39531e-07	-	Chromosome	1027619	1028101	-	483	protein_coding	- && PF01047:MarR family	MarR	157	246	241	240	81	100	94	106	81.8619	96.3617	83.5689	78.5934	36.7067	42.6886	34.1404	46.5655
gene:GYO_3413	740.156	235.936	768.064	680.415	2323.51	2820.42	3042.91	2787.66	-2.1785	1.00276e-08	1.43729e-07	-	Chromosome	3154819	3155850	-	1032	protein_coding	- && PF03060:Nitronate monooxygenase	NPD	548	240	893	838	2013	2700	3508	2632	133.73	43.9995	144.926	128.436	426.944	539.44	596.304	541.142
gene:GYO_3576	565.922	832.658	692.375	764.046	364.743	345.762	357.377	333.63	1.02791	1.00679e-08	1.43822e-07	-	Chromosome	3310614	3311639	-	1026	protein_coding	- && PF00005:ABC transporter|PF09383:NIL domain|PF07673:Protein of unknown function (DUF1602)	ABC_tran	419	847	805	941	316	331	412	315	102.848	156.19	131.409	145.065	67.4135	66.5181	70.443	65.1431
gene:GYO_3151	4793.46	5116.86	2158.84	2854.01	16377.7	26804.4	10219.1	25827.2	-2.40857	1.08237e-08	1.54102e-07	speD	Chromosome	2914551	2914931	-	381	protein_coding	- && PF02675:S-adenosylmethionine decarboxylase	-	3549	5205	2510	3515	14189	25660	11781	24385	2345.9	2584.71	1103.38	1459.22	8151.43	13886.4	5424.32	13580.1
gene:GYO_2716	526.753	261.496	597.765	585.417	2694.02	2041.14	1414.76	1663.91	-1.98644	1.09651e-08	1.55595e-07	-	Chromosome	2527529	2528875	-	1347	protein_coding	- && PF02347:Glycine cleavage system P-protein	-	390	266	695	721	2334	1954	1631	1571	72.9166	37.362	86.4156	84.6622	379.263	299.1	212.41	247.465
gene:GYO_3511	78.3377	325.395	110.092	176.193	25.3935	16.7136	28.6249	26.4786	2.82744	1.13516e-08	1.60545e-07	-	Chromosome	3249236	3250450	-	1215	protein_coding	- && PF07662:Na+ dependent nucleoside transporter C-terminus|PF01773:Na+ dependent nucleoside transporter N-terminus	-	58	331	128	217	22	16	33	25	12.0221	51.5428	17.6445	28.2491	3.96327	2.71521	4.76459	4.36585
gene:GYO_1847	584.831	621.298	400.804	440.89	230.85	223.544	212.518	213.947	1.2158	1.20053e-08	1.69227e-07	coaD	Chromosome	1673641	1674126	+	486	protein_coding	- && PF01467:Cytidylyltransferase-like	CTP_transf_2	433	632	466	543	200	214	245	202	224.378	246.035	160.592	176.72	90.0743	90.7897	88.4337	88.1902
gene:GYO_3493	312	249.699	259.748	239.526	17.3138	55.3637	58.1172	78.3766	2.33845	1.21514e-08	1.70722e-07	-	Chromosome	3234511	3235389	-	879	protein_coding	- && PF00756:Putative esterase	-	231	254	302	295	15	53	67	74	66.1839	54.6715	57.5431	53.0829	3.73516	12.4321	13.3713	17.8627
gene:GYO_2539	3309.09	4242.92	3161.7	3742.28	1100	1770.59	1164.95	1640.61	1.34877	1.23443e-08	1.72861e-07	serA	Chromosome	2377676	2379253	+	1578	protein_coding	- && PF02826:D-isomer specific 2-hydroxyacid dehydrogenase, NAD binding domain|PF00389:D-isomer specific 2-hydroxyacid dehydrogenase, catalytic domain|PF01842:ACT domain	2-Hacid_dh_C	2450	4316	3676	4609	953	1695	1343	1549	391.011	517.477	390.161	461.978	132.188	221.473	149.299	208.281
gene:GYO_0675	316.052	327.361	314.794	198.116	85.4146	88.7908	112.765	122.861	1.49323	1.24624e-08	1.73943e-07	-	Chromosome	623876	624748	+	873	protein_coding	- && PF16916:Dimerisation domain of Zinc Transporter|PF01545:Cation efflux family	-	234	333	366	244	74	85	130	116	67.5042	72.1683	70.2169	44.2076	18.5535	20.0754	26.1227	28.1935
gene:GYO_2348	1885.51	2036.91	1867.26	1588.99	495.174	792.85	742.512	899.213	1.33215	1.37393e-08	1.91138e-07	-	Chromosome	2222646	2223311	-	666	protein_coding	- && PF02585:GlcNAc-PI de-N-acetylase	-	1396	2072	2171	1957	429	759	856	849	527.887	588.616	545.96	464.77	140.991	234.978	225.469	270.482
gene:GYO_3503	2803.95	4010.91	2818.53	2888.92	706.402	1463.48	911.659	1021.01	1.60986	1.58515e-08	2.19805e-07	-	Chromosome	3243603	3244601	+	999	protein_coding	- && PF07992:Pyridine nucleotide-disulphide oxidoreductase	Pyr_redox_2	2076	4080	3277	3558	612	1401	1051	964	523.349	772.701	549.397	563.329	134.089	289.156	184.555	204.747
gene:GYO_1613	52.6753	21.6275	62.7868	50.341	349.738	251.748	340.896	126.038	-2.51078	1.78542e-08	2.46771e-07	-	Chromosome	1469099	1470061	+	963	protein_coding	- && PF12911:N-terminal TM domain of oligopeptide transport permease C|PF00528:Binding-protein-dependent transport system inner membrane component	BPD_transp_1	39	22	73	62	303	241	393	119	10.1992	4.32228	12.6961	10.1833	68.869	51.6	71.5903	26.2196
gene:GYO_2769	733.403	748.114	573.683	547.255	337.041	288.309	301.862	243.603	1.15136	1.79316e-08	2.47038e-07	-	Chromosome	2567748	2568515	+	768	protein_coding	- && PF06691:Protein of unknown function (DUF1189)	-	543	761	667	674	292	276	348	230	178.061	187.474	145.459	138.81	83.2202	74.0981	79.4889	63.5436
gene:GYO_3191	3099.74	6854.93	3607.23	4484.41	1686.36	1184.57	1330.62	1338.76	1.70383	1.85289e-08	2.54444e-07	ackA	Chromosome	2952065	2953252	-	1188	protein_coding	- && PF00871:Acetokinase family	-	2295	6973	4194	5523	1461	1134	1534	1264	486.514	1110.5	591.272	735.327	269.179	196.814	226.515	225.754
gene:GYO_0086	12800.1	3579.35	14222.5	5185.93	1228.12	1750.75	1545.74	1388.54	2.59741	1.87758e-08	2.57005e-07	cysK	Chromosome	81847	82773	+	927	protein_coding	- && PF00291:Pyridoxal-phosphate dependent enzyme	PALP	9477	3641	16536	6387	1064	1676	1782	1311	2574.66	743.117	2987.62	1089.78	251.229	372.781	337.222	300.074
gene:GYO_1619	225.559	210.376	230.505	178.629	449.004	376.055	401.616	389.765	-0.937659	1.89779e-08	2.5894e-07	-	Chromosome	1475769	1476758	+	990	protein_coding	- && PF00005:ABC transporter|PF08352:Oligopeptide/dipeptide transporter, C-terminal region|PF07673:Protein of unknown function (DUF1602)	ABC_tran	167	214	268	220	389	360	463	368	42.4826	40.8973	45.3393	35.1487	86.0046	74.9767	82.0416	78.8711
gene:GYO_2223	2381.2	3785.79	2157.98	2563.33	968.417	1105.18	882.167	1205.3	1.3879	2.00823e-08	2.72782e-07	-	Chromosome	2120043	2120759	-	717	protein_coding	- && PF00106:short chain dehydrogenase	adh_short	1763	3851	2509	3157	839	1058	1017	1138	619.245	1016.18	586.079	696.429	256.124	304.246	248.823	336.766
gene:GYO_0575	303.896	550.517	464.451	348.327	181.217	110.727	124.041	126.038	1.62356	2.01207e-08	2.72782e-07	-	Chromosome	526514	527218	-	705	protein_coding	- && PF00528:Binding-protein-dependent transport system inner membrane component	BPD_transp_1	225	560	540	429	157	106	143	119	80.3753	150.285	128.286	96.2476	48.7436	31.001	35.5824	35.8148
gene:GYO_0824	384.935	522.008	448.109	455.505	242.393	165.047	176.954	139.807	1.32415	2.03062e-08	2.74424e-07	-	Chromosome	741350	742558	+	1209	protein_coding	- && PF07690:Major Facilitator Superfamily	MFS_1	285	531	521	561	210	158	204	132	59.3674	83.0969	72.1749	73.3936	38.019	26.9457	29.6	23.1661
Novel00473	31.0649	12.7799	37.8441	47.0932	869.151	202.652	297.525	140.866	-3.54808	2.10959e-08	2.84194e-07	-	Chromosome	2983767	2985022	+	1256	-	PF06103:Bacterial protein of unknown function (DUF948)|PF11009:Protein of unknown function (DUF2847)|PF12732:YtxH-like protein	-	23	13	44	58	753	194	343	133	4.61177	1.95826	5.8673	7.30399	131.224	31.8472	47.9063	22.4681
gene:GYO_2341	464.624	814.962	525.517	520.461	213.536	182.805	249.817	224.538	1.41705	2.17578e-08	2.92186e-07	-	Chromosome	2214778	2215668	-	891	protein_coding	- && PF07728:AAA domain (dynein-related subfamily)	AAA_5	344	829	611	641	185	175	288	212	97.2322	176.033	114.852	113.789	45.4466	40.4967	56.7026	50.4851
gene:GYO_4368	309.299	303.768	356.079	676.356	13.851	88.7908	31.2271	59.312	3.0908	2.18611e-08	2.92649e-07	-	Chromosome	4059846	4060811	+	966	protein_coding	- && PF01497:Periplasmic binding protein	Peripla_BP_2	229	309	414	833	12	85	36	56	59.7018	60.5199	71.7791	136.392	2.71901	18.1427	6.53753	12.3003
gene:GYO_1696	1273.66	910.32	834.291	824.131	2554.36	2433.91	2191.1	1887.39	-1.23978	2.21493e-08	2.95579e-07	motB	Chromosome	1542414	1543199	-	786	protein_coding	- && PF13677:Membrane MotB of proton-channel complex MotA/MotB|PF00691:OmpA family	-	943	926	970	1015	2213	2330	2526	1782	302.147	222.897	206.692	204.251	616.263	611.213	563.766	481.05
gene:GYO_1697	590.234	619.332	476.492	552.127	1030.75	1443.63	1341.9	1035.84	-1.11725	2.27906e-08	3.03186e-07	-	Chromosome	1543171	1543983	-	813	protein_coding	- && PF01618:MotA/TolQ/ExbB proton channel family	-	437	630	554	680	893	1382	1547	978	135.369	146.611	114.129	132.294	240.419	350.491	333.801	255.243
gene:GYO_1412	198.546	122.883	238.246	207.86	594.439	426.196	575.967	539.104	-1.47555	2.305e-08	3.05682e-07	-	Chromosome	1299325	1299450	+	126	protein_coding	- && PF10035:Uncharacterized protein conserved in bacteria (DUF2179)	-	147	125	277	256	515	408	664	509	293.816	187.696	368.2	321.36	894.631	667.65	924.455	857.141
gene:GYO_4195	198.546	346.04	257.168	237.09	110.808	105.504	80.6701	87.9089	1.43652	2.35175e-08	3.10211e-07	-	Chromosome	3891564	3892949	-	1386	protein_coding	- && PF02378:Phosphotransferase system, EIIC|PF00367:phosphotransferase system, EIIB	-	147	352	299	292	96	101	93	83	26.7106	48.0503	36.1312	33.3228	15.1606	15.0251	11.7709	12.7063
gene:GYO_1617	6.75325	0.983067	2.58028	3.24781	34.6275	31.3379	39.9013	19.0646	-3.28727	2.35373e-08	3.10211e-07	-	Chromosome	1473769	1474869	+	1101	protein_coding	- && PF02746:Mandelate racemase / muconate lactonizing enzyme, N-terminal domain|PF13378:Enolase C-terminal domain-like	MR_MLE_N	5	1	3	4	30	30	46	18	1.1437	0.171842	0.456361	0.574638	5.96405	5.61814	7.32924	3.46889
gene:GYO_3389	1664	1081.37	726.779	1070.15	373.977	223.544	344.366	368.582	1.7927	2.47449e-08	3.2512e-07	-	Chromosome	3129418	3129681	-	264	protein_coding	- && PF05360:yiaA/B two helix domain	-	1232	1100	845	1318	324	214	397	348	1175.27	788.325	536.078	789.647	268.626	167.136	263.8	279.692
gene:GYO_4387	147.221	122.883	147.076	139.656	68.1008	62.6759	69.3936	64.6077	1.07061	2.49351e-08	3.26611e-07	-	Chromosome	4080180	4080485	+	306	protein_coding	- && PF10850:Protein of unknown function (DUF2653)	-	109	125	171	172	59	60	80	61	89.7087	77.2868	93.5944	88.9055	42.2025	40.4286	45.8624	42.2974
gene:GYO_2431	156.675	247.733	74.8282	173.758	654.46	557.815	690.467	834.605	-2.06833	2.56623e-08	3.35105e-07	-	Chromosome	2284674	2285990	-	1317	protein_coding	- && PF00860:Permease family	-	116	252	87	214	567	534	796	788	22.182	36.2019	11.0639	25.701	94.2333	83.6016	106.027	126.954
gene:GYO_3262	24.3117	20.6444	15.4817	12.9912	48.4786	86.7017	76.333	64.6077	-1.93978	2.98507e-08	3.88607e-07	-	Chromosome	3020649	3022952	+	2304	protein_coding	- && PF12833:Helix-turn-helix domain	-	18	21	18	16	42	83	88	61	1.96752	1.72446	1.30847	1.0984	3.99001	7.4277	6.70021	5.61762
gene:GYO_1127	312	133.697	575.403	478.239	1332.01	3340.63	3901.66	2034.61	-2.82229	3.46426e-08	4.49614e-07	-	Chromosome	1041226	1042092	+	867	protein_coding	- && PF00561:alpha/beta hydrolase fold	Abhydrolase_1	231	136	669	589	1154	3198	4498	1921	67.1	29.6781	129.236	107.453	291.336	760.533	910.099	470.125
gene:GYO_3200	1704.52	984.05	1260.9	1136.73	2569.36	3831.59	3251.09	3310.88	-1.35048	3.67019e-08	4.74894e-07	-	Chromosome	2958188	2958991	+	804	protein_coding	- && PF01513:ATP-NAD kinase	NAD_kinase	1262	1001	1466	1400	2226	3668	3748	3126	395.305	235.556	305.389	275.419	606.005	940.659	817.771	824.97
gene:GYO_3688	633.455	200.546	237.386	263.072	2412.39	1323.51	1444.26	1617.31	-2.35111	3.86491e-08	4.98573e-07	-	Chromosome	3410562	3411224	-	663	protein_coding	- && PF00486:Transcriptional regulatory protein, C terminal|PF00072:Response regulator receiver domain	Response_reg	469	204	276	324	2090	1267	1665	1527	178.151	58.2148	69.7221	77.2953	689.986	394.023	440.544	488.687
gene:GYO_2623	83.7403	151.392	98.9108	99.87	40.3988	33.4271	37.2991	31.7743	1.60538	3.98219e-08	5.1215e-07	proI	Chromosome	2442115	2442951	+	837	protein_coding	- && PF14748:Pyrroline-5-carboxylate reductase dimerisation|PF03807:NADP oxidoreductase coenzyme F420-dependent	F420_oxidored	62	154	115	123	35	32	43	30	18.655	34.8106	23.0116	23.2435	9.15271	7.88285	9.01221	7.60503
gene:GYO_1137	1266.91	1418.57	1424.32	1082.33	617.524	506.63	743.379	601.593	1.07169	4.2447e-08	5.43089e-07	-	Chromosome	1050850	1052592	+	1743	protein_coding	- && PF00664:ABC transporter transmembrane region|PF00005:ABC transporter|PF07673:Protein of unknown function (DUF1602)	ABC_membrane	938	1443	1656	1333	535	485	857	568	135.53	156.634	159.125	120.964	67.1837	57.3724	86.2525	69.1443
gene:GYO_0555	63.4805	93.3913	66.2272	78.7593	174.292	174.448	153.533	169.463	-1.14822	4.24827e-08	5.43089e-07	nin	Chromosome	487354	487752	-	399	protein_coding	- && PF11033:Competence protein J (ComJ)	-	47	95	77	97	151	167	177	160	29.6657	45.0471	32.3216	38.4521	82.8345	86.2984	77.8195	85.0849
gene:GYO_3302	1543.79	1363.51	1254.88	1025.49	675.237	606.912	633.217	684.207	0.996012	4.53106e-08	5.77507e-07	-	Chromosome	3060352	3061458	-	1107	protein_coding	- && PF10776:Protein of unknown function (DUF2600)	-	1143	1387	1459	1263	585	581	730	646	260.033	237.053	220.741	180.459	115.669	108.215	115.681	123.82
gene:GYO_3428	2142.13	2883.34	2137.33	1982.79	1243.13	1163.68	1019.22	1087.74	1.01897	4.84435e-08	6.15594e-07	alaT	Chromosome	3167917	3169077	-	1161	protein_coding	- && PF00155:Aminotransferase class I and II	Aminotran_1_2	1586	2933	2485	2442	1077	1114	1175	1027	344.033	477.965	358.483	332.686	203.044	197.839	177.539	187.691
gene:GYO_4367	284.987	347.023	148.796	239.526	86.5688	81.4787	59.852	49.7797	1.87824	5.77171e-08	7.31204e-07	-	Chromosome	4059271	4059669	-	399	protein_coding	- && -	-	211	353	173	295	75	78	69	47	133.18	167.386	72.6187	116.942	41.143	40.307	30.3364	24.9937
gene:GYO_2784	86.4416	43.2549	46.4451	44.6573	207.765	161.913	144.859	174.759	-1.65839	5.78848e-08	7.31204e-07	-	Chromosome	2581144	2581278	+	135	protein_coding	- && -	-	64	44	54	55	180	155	167	165	119.392	61.6645	66.9939	64.4393	291.841	236.732	217.006	259.332
gene:GYO_1428	153.974	218.241	49.8854	98.2461	19.6223	15.669	25.1552	21.1829	2.66668	5.89914e-08	7.42977e-07	-	Chromosome	1310300	1313392	+	3093	protein_coding	- && PF02787:Carbamoyl-phosphate synthetase large chain, oligomerisation domain|PF02786:Carbamoyl-phosphate synthase L chain, ATP binding domain	CPSase_L_D2	114	222	58	121	17	15	29	20	9.28227	13.5797	3.14068	6.18767	1.20303	0.999932	1.64477	1.372
gene:GYO_1442	4.05195	1.96613	0	4.05976	23.085	35.5163	32.0946	20.1237	-3.51111	6.17957e-08	7.76001e-07	-	Chromosome	1323451	1325079	+	1629	protein_coding	- && PF00496:Bacterial extracellular solute-binding proteins, family 5 Middle	-	3	2	0	5	20	34	37	19	0.463799	0.232287	0	0.485479	2.6873	4.30345	3.98445	2.47479
gene:GYO_0842	118.857	86.5099	135.895	142.091	369.36	391.724	279.309	257.372	-1.42198	6.20758e-08	7.77225e-07	-	Chromosome	757573	758970	+	1398	protein_coding	- && PF00232:Glycosyl hydrolase family 1	Glyco_hydro_1	88	88	158	175	320	375	322	243	15.8528	11.9095	18.9289	19.7994	50.1014	55.3074	40.4052	36.8811
gene:GYO_1297	2487.9	1886.51	1135.32	1071.78	525.184	532.745	374.726	384.469	1.85652	6.37235e-08	7.95516e-07	-	Chromosome	1189597	1190034	-	438	protein_coding	- && PF01230:HIT domain	HIT	1842	1919	1320	1320	455	510	432	363	1059.12	828.929	504.748	476.674	227.376	240.079	173.021	175.848
gene:GYO_1962	12239.6	7384.8	8584.6	10331.3	24352.4	25540.4	18398.9	22606.4	-1.23794	6.62255e-08	8.22239e-07	-	Chromosome	1785202	1786104	+	903	protein_coding	- && PF00549:CoA-ligase|PF02629:CoA binding domain	CoA_binding	9062	7512	9981	12724	21098	24450	21211	21344	2527.35	1573.93	1851.23	2228.73	5114	5582.77	4120.61	5015.26
gene:GYO_2642	102.649	161.223	67.0873	96.6222	21.9308	27.1596	32.0946	29.656	1.9415	6.62504e-08	8.22239e-07	-	Chromosome	2460251	2460910	-	660	protein_coding	- && PF00528:Binding-protein-dependent transport system inner membrane component	BPD_transp_1	76	164	78	119	19	26	37	28	29.0001	47.0128	19.7936	28.5184	6.30111	8.12247	9.83436	9.00159
gene:GYO_1986	880.624	799.233	994.268	1004.38	6904.73	3348.98	2562.36	2412.73	-2.0494	6.82849e-08	8.45026e-07	fliM	Chromosome	1805274	1806272	+	999	protein_coding	- && PF02154:Flagellar motor switch protein FliM|PF01052:Type III flagellar switch regulator (C-ring) FliN C-term	-	652	813	1156	1237	5982	3206	2954	2278	164.366	153.972	193.806	195.851	1310.65	661.694	518.72	483.831
gene:GYO_0084	836.052	825.776	655.391	667.424	423.61	321.736	359.979	398.238	0.988642	7.18247e-08	8.86255e-07	hslO	Chromosome	80423	80830	+	408	protein_coding	- && PF01430:Hsp33 protein	-	619	840	762	822	367	308	415	376	382.085	389.525	312.802	318.664	196.885	155.65	178.433	195.539
gene:GYO_3099	694.234	1260.29	1721.05	1111.56	3671.67	4026.93	3121.85	4096.77	-1.63905	7.26657e-08	8.9404e-07	-	Chromosome	2861322	2862299	-	978	protein_coding	- && PF00766:Electron transfer flavoprotein FAD-binding domain|PF01012:Electron transfer flavoprotein domain	-	514	1282	2001	1369	3181	3855	3599	3868	132.359	248.008	342.676	221.404	711.921	812.727	645.552	839.176
gene:GYO_0019	522.701	768.758	436.068	589.477	263.169	255.927	214.253	220.302	1.28159	7.3335e-08	8.99675e-07	-	Chromosome	22569	23222	-	654	protein_coding	- && PF01712:Deoxynucleoside kinase	-	387	782	507	726	228	245	247	208	149.026	226.228	129.839	175.582	76.307	77.2409	66.2533	67.4825
gene:GYO_2488	626.702	958.49	496.274	616.271	178.909	287.265	218.59	247.84	1.53201	7.69013e-08	9.40716e-07	tyrA	Chromosome	2335802	2336917	-	1116	protein_coding	- && PF02153:Prephenate dehydrogenase|PF01842:ACT domain	ACT	464	975	577	759	155	275	252	234	104.709	165.294	86.5938	107.572	30.4001	50.8075	39.6118	44.4894
gene:GYO_3644	152.623	872.963	184.92	260.636	31.1648	17.7582	57.2498	36.0109	3.36822	7.96708e-08	9.71802e-07	-	Chromosome	3367383	3368792	-	1410	protein_coding	- && PF13520:Amino acid permease	-	113	888	215	321	27	17	66	34	20.1831	119.154	25.5384	36.0087	4.19133	2.48593	8.21132	5.11641
gene:GYO_1139	1318.23	1491.31	1294.44	1297.5	841.449	907.756	878.697	820.836	0.647027	9.23803e-08	1.12121e-06	-	Chromosome	1053947	1055125	-	1179	protein_coding	- && PF00202:Aminotransferase class-III	Aminotran_3	976	1517	1505	1598	729	869	1013	775	208.48	243.438	213.795	214.38	135.338	151.972	150.724	139.474
gene:GYO_3412	171.533	45.2211	144.496	163.202	590.977	612.135	634.952	500.975	-2.15807	9.24467e-08	1.12121e-06	-	Chromosome	3154540	3154794	-	255	protein_coding	- && -	-	127	46	168	201	512	586	732	473	125.428	34.1298	110.343	124.674	439.478	473.823	503.569	393.574
gene:GYO_2314	133.714	36.3735	229.645	173.758	803.359	812.697	1383.54	798.594	-2.72629	9.88357e-08	1.19529e-06	-	Chromosome	2188121	2188903	-	783	protein_coding	- && -	-	99	37	267	214	696	778	1595	754	31.8422	8.94039	57.1116	43.2289	194.561	204.869	357.345	204.322
gene:GYO_3328	517.299	99.2898	1950.69	1015.75	10224.4	10842.9	10547	13459.6	-3.65275	1.00895e-07	1.21675e-06	-	Chromosome	3080948	3081835	-	888	protein_coding	- && PF00950:ABC 3 transport family	ABC-3	383	101	2268	1251	8858	10380	12159	12708	108.621	21.5191	427.765	222.826	2183.38	2410.15	2402	3036.47
gene:GYO_2715	513.247	202.512	606.366	574.05	2216.16	1704.78	1478.95	2027.2	-1.96939	1.04061e-07	1.25138e-06	-	Chromosome	2526070	2527536	-	1467	protein_coding	- && PF02347:Glycine cleavage system P-protein	-	380	206	705	707	1920	1632	1705	1914	65.2353	26.5677	80.4885	76.2274	286.469	229.377	203.884	276.833
gene:GYO_1113	244.468	406.99	216.744	284.995	47.3243	94.0138	88.4769	102.737	1.79217	1.04615e-07	1.2545e-06	-	Chromosome	1031969	1032970	+	1002	protein_coding	- && PF01032:FecCD transport family	-	181	414	252	351	41	90	102	97	45.4925	78.1716	42.1219	55.4066	8.95619	18.5197	17.8575	20.5404
gene:GYO_1616	13.5065	1.96613	24.0826	11.3673	168.521	80.4341	95.4163	88.968	-3.08243	1.05602e-07	1.26278e-06	-	Chromosome	1472813	1473772	+	960	protein_coding	- && PF02016:LD-carboxypeptidase	-	10	2	28	14	146	77	110	84	2.62336	0.394162	4.88497	2.30663	33.2881	16.5378	20.1006	18.5658
gene:GYO_0017	7548.78	4702.01	6331.15	6038.48	2681.33	2593.74	1776.48	2923.24	1.30357	1.12206e-07	1.33799e-06	serS	Chromosome	20788	22230	+	1443	protein_coding	- && PF00587:tRNA synthetase class II core domain (G, H, P, S and T)|PF02403:Seryl-tRNA synthetase N-terminal domain	tRNA-synt_2b	5589	4783	7361	7437	2323	2483	2048	2760	975.432	627.12	854.369	815.179	352.363	354.788	248.973	405.834
gene:GYO_1614	33.7662	17.6952	73.9681	43.8454	213.536	181.76	260.226	167.345	-2.27398	1.12771e-07	1.34097e-06	-	Chromosome	1470066	1471073	+	1008	protein_coding	- && PF00005:ABC transporter|PF08352:Oligopeptide/dipeptide transporter, C-terminal region	ABC_tran	25	18	86	54	185	174	300	158	6.2461	3.37854	14.2894	8.47335	40.1715	35.5916	52.2094	33.2584
gene:GYO_1731	361.974	386.345	792.146	584.605	165.058	164.002	181.291	177.936	1.62761	1.15716e-07	1.37215e-06	-	Chromosome	1573352	1574152	-	801	protein_coding	- && PF00188:Cysteine-rich secretory protein family	SCP	268	393	921	720	143	157	209	168	84.262	92.8275	192.576	142.175	39.0761	40.4135	45.7722	44.5023
gene:GYO_0965	6.75325	5.8984	7.74084	8.11951	40.3988	49.0961	39.9013	21.1829	-2.39085	1.22164e-07	1.44458e-06	-	Chromosome	883252	885096	+	1845	protein_coding	- && -	-	5	6	9	10	35	47	46	20	0.682501	0.615278	0.816998	0.857285	4.15221	5.25243	4.37371	2.30006
gene:GYO_0957	1.35065	6.88147	8.60094	4.87171	34.6275	38.6501	31.2271	25.4194	-2.51987	1.23387e-07	1.45501e-06	-	Chromosome	874662	875945	+	1284	protein_coding	- && PF13416:Bacterial extracellular solute-binding protein	-	1	7	10	6	30	37	36	24	0.196139	1.03145	1.3044	0.739108	5.11403	5.94149	4.91842	3.96599
gene:GYO_3884	1761.25	1418.57	1020.93	1368.95	2822.14	3083.65	3058.52	2926.41	-1.09503	1.25233e-07	1.4727e-06	flgL	Chromosome	3596647	3597543	-	897	protein_coding	- && PF00700:Bacterial flagellin C-terminal helical region|PF00669:Bacterial flagellin N-terminal helical region	-	1304	1443	1187	1686	2445	2952	3526	2763	366.112	304.362	221.632	297.294	596.614	678.552	689.57	653.572
gene:GYO_1168	578.078	895.574	1220.47	1234.17	3160.34	10673.7	2860.75	6578.34	-2.56632	1.26528e-07	1.48383e-06	katA	Chromosome	1069638	1071089	-	1452	protein_coding	- && PF00199:Catalase|PF06628:Catalase-related immune-responsive	Catalase	428	911	1419	1520	2738	10218	3298	6211	74.2346	118.705	163.678	165.577	412.738	1450.97	398.449	907.612
Novel00345	1522.18	1004.69	671.733	615.459	287.409	130.575	209.916	267.963	2.08965	1.28218e-07	1.49952e-06	-	Chromosome	2352479	2352790	-	312	-	-	-	1127	1022	781	758	249	125	242	253	909.701	619.745	419.248	384.27	174.684	82.6065	136.066	172.057
gene:GYO_1361	734.754	597.705	469.611	420.591	159.287	197.429	202.976	260.549	1.43605	1.29901e-07	1.51504e-06	-	Chromosome	1245319	1246473	-	1155	protein_coding	- && PF05145:Putative ammonia monooxygenase	-	544	608	546	518	138	189	234	246	118.617	99.5951	79.1746	70.9365	26.152	33.7395	35.5404	45.1917
gene:GYO_4360	99.9481	19.6613	173.739	44.6573	2.3085	9.40138	4.3371	6.35486	3.91328	1.32361e-07	1.53951e-06	-	Chromosome	4053267	4054592	-	1326	protein_coding	- && PF00296:Luciferase-like monooxygenase	-	74	20	202	55	2	9	5	6	14.0546	2.85367	25.5143	6.56056	0.330137	1.39945	0.661477	0.960092
gene:GYO_2932	52.6753	57.0179	30.9634	36.5378	2.3085	10.446	6.93936	1.05914	3.06754	1.41935e-07	1.64636e-06	-	Chromosome	2702633	2702821	-	189	protein_coding	- && -	-	39	58	36	45	2	10	8	1	51.9675	58.0608	31.9018	37.6593	2.3162	10.9093	7.42534	1.12265
gene:GYO_0696	1707.22	1684.98	1586.01	1373.82	915.321	851.348	839.663	1028.43	0.805124	1.42619e-07	1.6498e-06	-	Chromosome	641192	643351	+	2160	protein_coding	- && PF09371:Tex-like protein N-terminal domain|PF12836:Helix-hairpin-helix motif|PF00575:S1 RNA binding domain|PF16921:Tex protein YqgF-like domain	S1	1264	1714	1844	1692	793	815	968	971	147.375	150.132	142.982	123.899	80.3575	77.797	78.6158	95.383
gene:GYO_0878	4.05195	0	13.7615	21.9227	133.893	124.307	228.999	146.162	-3.96719	1.51663e-07	1.74968e-06	-	Chromosome	793734	794747	-	1014	protein_coding	- && PF07885:Ion channel	Ion_trans_2	3	0	16	27	116	119	264	138	0.745097	0	2.64276	4.2116	25.0396	24.1974	45.6724	28.8766
gene:GYO_2771	2420.36	3493.82	3002.59	2223.12	1198.11	1398.72	1288.12	965.939	1.19938	1.56522e-07	1.80085e-06	ispG	Chromosome	2570170	2571297	+	1128	protein_coding	- && PF04551:GcpE protein	-	1792	3554	3491	2738	1038	1339	1485	912	400.091	596.108	518.341	383.925	201.417	244.754	230.943	171.55
gene:GYO_0861	834.702	935.88	841.172	704.774	362.435	479.471	470.142	397.179	0.95504	1.57895e-07	1.81176e-06	-	Chromosome	776039	776686	+	648	protein_coding	- && PF06971:Putative DNA-binding protein N-terminus|PF02629:CoA binding domain	CoA_binding	618	952	978	868	314	459	542	375	240.183	277.958	252.778	211.869	106.062	146.048	146.728	122.79
gene:GYO_1057	334.961	167.121	534.118	606.528	1330.85	2055.77	2335.1	1846.09	-2.20291	1.6693e-07	1.91027e-06	-	Chromosome	975181	976008	+	828	protein_coding	- && PF03631:Virulence factor BrkB	Ribonuclease_BN	248	170	621	747	1153	1968	2692	1743	75.4312	38.845	125.613	142.696	304.794	490.065	570.339	446.655
gene:GYO_3930	1318.23	1238.66	1610.96	1178.95	402.834	628.848	612.399	668.319	1.20884	1.6903e-07	1.92912e-06	tarA	Chromosome	3648304	3649077	+	774	protein_coding	- && PF03808:Glycosyl transferase WecB/TagA/CpsF family	-	976	1260	1873	1452	349	602	706	631	317.569	307.997	405.296	296.72	98.6942	160.367	160.012	172.979
gene:GYO_1036	1500.57	1273.07	1427.76	1057.16	608.29	769.869	654.902	582.529	1.0068	1.69958e-07	1.93452e-06	-	Chromosome	954951	955700	-	750	protein_coding	- && PF00557:Metallopeptidase family M24	Peptidase_M24	1111	1295	1660	1302	527	737	755	550	373.063	326.682	370.699	274.582	153.8	202.612	176.593	155.599
gene:GYO_1524	33.7662	8.8476	52.4657	31.6661	181.217	270.551	403.351	116.506	-2.93715	1.79666e-07	2.03957e-06	-	Chromosome	1393540	1394100	+	561	protein_coding	- && PF07849:Protein of unknown function (DUF1641)	-	25	9	61	39	157	259	465	110	11.2229	3.03526	18.2113	10.9957	61.2553	95.191	145.405	41.604
gene:GYO_1979	576.727	424.685	396.503	589.477	2124.98	1170.99	1354.04	1113.16	-1.53625	1.8329e-07	2.07517e-06	fliJ	Chromosome	1800783	1801226	+	444	protein_coding	- && PF02050:Flagellar FliJ protein	-	427	432	461	726	1841	1121	1561	1051	242.2	184.085	173.897	258.628	907.566	520.573	616.749	502.256
gene:GYO_1079	459.221	258.547	182.34	164.014	753.726	1303.66	1167.55	1048.55	-2.00934	1.9626e-07	2.21613e-06	-	Chromosome	996983	998836	+	1854	protein_coding	- && PF02954:Bacterial regulatory protein, Fis family|PF00158:Sigma-54 interaction domain	Sigma54_activat	340	263	212	202	653	1248	1346	990	46.1847	26.8388	19.1514	17.2331	77.0922	138.792	127.357	113.3
gene:GYO_4255	5068.99	7751.48	3838.6	5421.4	2443.55	1775.82	1817.25	2252.8	1.41352	2.02808e-07	2.28073e-06	-	Chromosome	3945203	3945961	+	759	protein_coding	- && PF00106:short chain dehydrogenase	adh_short	3753	7885	4463	6677	2117	1700	2095	2127	1245.28	1965.52	984.827	1391.43	610.501	461.813	484.206	594.608
gene:GYO_4374	310.649	347.023	245.127	344.267	689.088	619.447	536.066	645.018	-0.996998	2.03053e-07	2.28073e-06	iolJ	Chromosome	4065745	4066617	-	873	protein_coding	- && PF01116:Fructose-bisphosphate aldolase class-II	F_bP_aldolase	230	353	285	424	597	593	618	609	66.3503	76.5027	54.6771	76.8198	149.681	140.055	124.183	148.016
gene:GYO_4441	771.221	692.079	688.935	787.593	1126.55	1317.24	1151.07	1149.17	-0.690761	2.19095e-07	2.45444e-06	rocF	Chromosome	4137503	4138393	-	891	protein_coding	- && PF00491:Arginase family	-	571	704	801	970	976	1261	1327	1085	161.394	149.49	150.567	172.193	239.761	291.807	261.265	258.379
gene:GYO_1844	344.416	556.416	577.123	499.35	171.983	207.875	158.738	243.603	1.34015	2.20351e-07	2.46203e-06	ylbF	Chromosome	1671981	1672430	+	450	protein_coding	- && PF06133:Control of competence regulator ComK, YlbF/YmcA	-	255	566	671	615	149	199	183	230	142.711	237.969	249.738	216.164	72.4738	91.18	71.339	108.448
gene:GYO_0987	6760	7802.6	8429.78	6908.08	4546.6	3766.82	3945.9	4685.65	0.819464	2.21656e-07	2.47012e-06	-	Chromosome	910987	912930	+	1944	protein_coding	- && PF00884:Sulfatase	Sulfatase	5005	7937	9801	8508	3939	3606	4549	4424	648.391	772.461	844.402	692.234	443.503	382.462	410.495	482.863
Novel00636	35.1169	18.6783	12.9014	19.4868	289.717	156.69	74.5982	80.4949	-2.81745	2.29596e-07	2.55194e-06	-	Chromosome	3974171	3975284	+	1114	-	PF00005:ABC transporter|PF03459:TOBE domain|PF17912:MalK OB fold domain	ABC_tran	26	19	15	24	251	150	86	76	5.87784	3.2269	2.25518	3.40759	49.3169	27.7629	13.5426	14.4755
gene:GYO_1117	1249.35	1796.06	1799.32	1798.47	177.755	485.738	404.218	611.126	1.98429	2.32996e-07	2.58298e-06	-	Chromosome	1035079	1035663	+	585	protein_coding	- && PF00881:Nitroreductase family	Nitroreductase	925	1827	2092	2215	154	465	466	577	398.213	590.88	598.937	598.88	57.6198	163.891	139.739	209.279
Novel00158	32.4156	20.6444	37.8441	24.3585	400.525	86.7017	174.352	111.21	-2.74561	2.3774e-07	2.62873e-06	-	Chromosome	1157484	1157976	+	493	-	PF00582:Universal stress protein family	Usp	24	21	44	30	347	83	201	105	12.2601	8.05914	14.9479	9.6249	154.06	34.7128	71.5216	45.1906
gene:GYO_3638	437.611	451.228	504.875	603.28	53.0956	173.403	151.799	147.221	1.92465	2.46481e-07	2.71832e-06	-	Chromosome	3362991	3363800	-	810	protein_coding	- && PF00005:ABC transporter	ABC_tran	324	459	587	743	46	166	175	139	100.737	107.212	121.375	145.086	12.4303	42.2554	37.9002	36.4112
gene:GYO_1806	1522.18	1534.57	940.082	969.47	544.807	557.815	431.975	461.786	1.31445	2.55016e-07	2.80518e-06	-	Chromosome	1639610	1640248	-	639	protein_coding	- && PF06335:Protein of unknown function (DUF1054)	-	1127	1561	1093	1194	472	534	498	436	444.173	462.188	286.48	295.546	161.677	172.306	136.715	144.774
gene:GYO_3690	41.8701	6.88147	4.30047	22.7346	562.12	143.11	178.689	151.457	-3.78904	2.68927e-07	2.95058e-06	-	Chromosome	3412014	3412769	-	756	protein_coding	- && PF12730:ABC-2 family transporter protein	-	31	7	5	28	487	137	206	143	10.3269	1.75183	1.1077	5.85812	140.998	37.3644	47.8006	40.1347
gene:GYO_0395	1532.99	973.236	915.14	1255.28	534.418	560.949	484.021	422.598	1.22345	2.7505e-07	3.00999e-06	-	Chromosome	335084	336472	+	1389	protein_coding	- && PF00324:Amino acid permease	AA_permease	1135	990	1064	1546	463	537	558	399	205.789	134.85	128.296	176.047	72.9602	79.7133	70.4726	60.9503
gene:GYO_1717	293.091	152.375	222.764	164.014	3145.33	821.054	865.686	731.868	-2.74195	2.87562e-07	3.13885e-06	-	Chromosome	1558067	1559980	+	1914	protein_coding	- && PF00702:haloacid dehalogenase-like hydrolase|PF00122:E1-E2 ATPase	E1-E2_ATPase	217	155	259	202	2725	786	998	691	28.5527	15.3217	22.6638	16.6929	311.625	84.672	91.4696	76.6022
gene:GYO_3263	45.9221	39.3227	54.1859	43.0334	96.9571	135.798	98.8859	154.635	-1.41231	2.93081e-07	3.19091e-06	-	Chromosome	3022994	3024490	-	1497	protein_coding	- && PF13416:Bacterial extracellular solute-binding protein	-	34	40	63	53	84	130	114	146	5.71987	5.05539	7.04845	5.59984	12.2819	17.9053	13.3589	20.6936
gene:GYO_3883	68.8831	96.3405	56.7662	68.2039	174.292	153.556	160.473	174.759	-1.19353	2.9651e-07	3.22001e-06	-	Chromosome	3596024	3596599	-	576	protein_coding	- && -	-	51	98	66	84	151	147	185	165	22.2986	32.1899	19.1909	23.0663	57.3801	52.6204	56.3427	60.7808
gene:GYO_0081	723.948	1329.11	645.93	685.287	310.494	277.863	326.15	265.845	1.51938	3.00699e-07	3.25719e-06	hpt	Chromosome	76423	76962	+	540	protein_coding	- && PF00156:Phosphoribosyl transferase domain	Pribosyltran	536	1352	751	844	269	266	376	251	249.977	473.696	232.928	247.212	109.035	101.566	122.147	98.6246
gene:GYO_3409	1264.21	1259.31	822.25	1249.59	2624.77	2736.85	2189.37	2232.67	-1.09052	3.04487e-07	3.28985e-06	-	Chromosome	3151642	3153630	-	1989	protein_coding	- && PF02743:Cache domain|PF00015:Methyl-accepting chemotaxis protein (MCP) signalling domain|PF02203:Tar ligand binding domain homologue|PF00672:HAMP domain	Cache_1	936	1281	956	1539	2274	2620	2524	2108	118.514	121.851	80.5004	122.384	250.244	271.597	222.609	224.875
gene:GYO_2668	1233.14	1332.06	1910.27	1564.63	436.307	685.256	592.448	740.341	1.29943	3.1356e-07	3.3793e-06	-	Chromosome	2485396	2486514	+	1119	protein_coding	- && PF00724:NADH:flavin oxidoreductase / NADH oxidase family	Oxidored_FMN	913	1355	2221	1927	378	656	683	699	205.48	229.1	332.425	272.379	73.9382	120.874	107.073	132.542
sRNA00101	903.585	55.0517	80.8488	77.1354	6069.05	4406.12	5818.66	4664.47	-4.23233	3.20788e-07	3.44847e-06	-	Chromosome	3414734	3414803	-	70	-	-	-	669	56	94	95	5258	4218	6708	4404	2406.9	151.358	224.908	214.658	16441.1	12424.2	16810.6	13349.2
gene:GYO_3452	513.247	535.771	345.758	410.035	233.159	213.098	196.037	208.651	1.08383	3.37034e-07	3.61399e-06	-	Chromosome	3191391	3191732	+	342	protein_coding	- && PF00420:NADH-ubiquinone/plastoquinone oxidoreductase chain 4L	-	380	545	402	505	202	204	226	197	279.825	301.5	196.868	233.554	129.28	122.988	115.923	122.221
gene:GYO_2182	580.779	966.355	410.265	690.971	273.558	198.474	190.833	153.576	1.69845	3.56111e-07	3.80896e-06	-	Chromosome	2042153	2043550	+	1398	protein_coding	- && PF01235:Sodium:alanine symporter family	-	430	983	477	851	237	190	220	145	77.4624	133.034	57.146	96.2818	37.1064	28.0224	27.606	22.0073
gene:GYO_4213	268.779	352.921	340.597	422.215	602.519	811.653	792.822	720.217	-1.07779	3.57677e-07	3.81612e-06	galK	Chromosome	3909642	3910814	-	1173	protein_coding	- && PF10509:Galactokinase galactose-binding signature|PF08544:GHMP kinases C terminal|PF00288:GHMP kinases N terminal domain	GHMP_kinases	199	359	396	520	522	777	914	680	42.7252	57.9046	56.5421	70.1176	97.4047	136.578	136.69	123.003
gene:GYO_0528	3273.98	2711.3	1923.17	2517.86	7366.43	5647.1	5446.53	5284.07	-1.18765	3.59614e-07	3.82719e-06	-	Chromosome	460216	461646	+	1431	protein_coding	- && PF00474:Sodium:solute symporter family	-	2424	2758	2236	3101	6382	5406	6279	4989	426.601	364.646	261.702	342.755	976.168	778.925	769.731	739.74
gene:GYO_2631	11092.9	8454.37	9990.85	9724.74	4002.94	5827.81	4942.56	5448.23	0.957183	3.64562e-07	3.87018e-06	-	Chromosome	2449717	2451126	-	1410	protein_coding	- && PF00393:6-phosphogluconate dehydrogenase, C-terminal domain|PF03446:NAD binding domain of 6-phosphogluconate dehydrogenase	NAD_binding_2	8213	8600	11616	11977	3468	5579	5698	5144	1466.94	1153.97	1379.79	1343.54	538.353	815.823	708.911	774.082
gene:GYO_1125	178.286	43.2549	429.187	393.796	1453.2	2355.57	3641.43	2054.74	-3.18486	3.6614e-07	3.87726e-06	-	Chromosome	1040303	1040821	+	519	protein_coding	- && PF08239:Bacterial SH3 domain	SH3_3	132	44	499	485	1259	2255	4198	1940	64.0525	16.0399	161.031	147.807	530.965	895.856	1418.94	793.121
gene:GYO_3843	72.9351	50.1364	58.4864	67.392	408.605	145.199	173.484	234.071	-1.94995	3.93902e-07	4.16089e-06	-	Chromosome	3559657	3560874	-	1218	protein_coding	- && PF00067:Cytochrome P450	p450	54	51	68	83	354	139	200	221	11.1654	7.92208	9.35054	10.7784	63.6155	23.5302	28.8052	38.4991
gene:GYO_3571	867.117	1002.73	995.989	1147.29	565.583	639.294	521.32	509.448	0.845319	3.96841e-07	4.18156e-06	sufC	Chromosome	3307344	3308129	-	786	protein_coding	- && PF00005:ABC transporter	ABC_tran	642	1020	1158	1413	490	612	601	481	205.704	245.524	246.752	284.342	136.452	160.542	134.134	129.846
gene:GYO_1003	155.325	104.205	186.64	136.408	28.8563	60.5867	49.443	49.7797	1.62307	3.99507e-07	4.19926e-06	-	Chromosome	927318	928508	+	1191	protein_coding	- && PF07690:Major Facilitator Superfamily	MFS_1	115	106	217	168	25	58	57	47	24.3173	16.8388	30.5157	22.311	4.59447	10.041	8.39559	8.3732
gene:GYO_4475	52.6753	193.664	452.409	309.353	30.0105	29.2488	26.0226	44.484	2.96065	4.19763e-07	4.40131e-06	-	Chromosome	4168860	4169306	-	447	protein_coding	- && -	-	39	197	526	381	26	28	30	42	21.9729	83.3826	197.085	134.815	12.7313	12.9154	11.7734	19.9364
Novel00640	5.4026	7.86453	6.02066	13.8032	124.659	44.9177	45.1059	36.0109	-2.89479	4.42346e-07	4.6267e-06	-	Chromosome	3996497	3997920	+	1424	-	PF00199:Catalase|PF18011:C-terminal domain found in long catalases|PF06628:Catalase-related immune-responsive	Catalase	4	8	7	17	108	43	52	34	0.707423	1.06291	0.823309	1.88826	16.6005	6.22612	6.40592	5.06611
gene:GYO_0918	1250.7	627.197	790.426	803.832	2451.63	2607.32	2112.17	1836.55	-1.37635	4.54101e-07	4.73587e-06	-	Chromosome	834181	835176	+	996	protein_coding	- && PF11258:Protein of unknown function (DUF3048)	-	926	638	919	990	2124	2496	2435	1734	234.143	121.193	154.537	157.216	466.769	516.707	428.872	369.398
gene:GYO_1938	441.663	354.887	402.524	367.814	810.284	595.421	849.205	910.863	-1.01599	4.55008e-07	4.73587e-06	-	Chromosome	1765547	1766113	+	567	protein_coding	- && -	-	327	361	468	453	702	570	979	860	145.243	120.459	138.241	126.368	270.995	207.277	302.892	321.826
gene:GYO_3455	411.948	512.178	351.778	373.498	235.467	164.002	150.064	169.463	1.19956	4.60866e-07	4.78514e-06	-	Chromosome	3193688	3193972	+	285	protein_coding	- && PF04066:Multiple resistance and pH regulation protein F (MrpF / PhaF)	-	305	521	409	460	204	157	173	160	269.516	345.867	240.355	255.291	156.672	113.583	106.485	119.119
gene:GYO_2239	33.7662	16.7121	20.6422	22.7346	49.6328	89.8354	94.5488	83.6723	-1.7815	4.90534e-07	5.08079e-06	-	Chromosome	2134261	2134383	+	123	protein_coding	- && -	-	25	17	24	28	43	86	109	79	51.1875	26.1493	32.6799	36.006	76.5192	144.162	155.457	136.278
gene:GYO_1758	54.026	42.2719	35.2638	38.1617	81.9518	131.619	111.897	105.914	-1.36203	4.96719e-07	5.13236e-06	-	Chromosome	1596248	1596706	+	459	protein_coding	- && PF00578:AhpC/TSA family	-	40	43	41	47	71	126	129	100	21.9471	17.7244	14.9605	16.196	33.8573	56.6001	49.3021	46.2267
gene:GYO_1062	533.507	788.42	627.008	579.733	339.35	289.354	350.438	303.974	0.979051	4.98317e-07	5.1364e-06	-	Chromosome	980353	981474	-	1122	protein_coding	- && PF13353:4Fe-4S single cluster domain|PF08756:YfkB-like domain|PF04055:Radical SAM superfamily	Radical_SAM	395	802	729	714	294	277	404	287	88.6612	135.238	108.82	100.653	57.3537	50.9033	63.165	54.2743
gene:GYO_2934	22.961	21.6275	29.2432	29.2302	2.3085	5.22299	6.07194	5.29572	2.43001	5.05529e-07	5.19816e-06	pcaC	Chromosome	2703736	2704470	+	735	protein_coding	- && PF02627:Carboxymuconolactone decarboxylase family|PF07883:Cupin domain	CMD	17	22	34	36	2	5	7	5	5.82493	5.66307	7.74759	7.74706	0.595593	1.40263	1.6707	1.4434
gene:GYO_4192	1137.25	1466.74	1045.01	1097.76	435.153	668.543	594.183	485.088	1.12003	5.14895e-07	5.28171e-06	thiD	Chromosome	3888998	3889696	+	699	protein_coding	- && PF08543:Phosphomethylpyrimidine kinase	-	842	1492	1215	1352	377	640	685	458	303.364	403.839	291.121	305.929	118.051	188.783	171.91	139.025
gene:GYO_3422	267.429	147.46	263.189	205.424	446.695	575.574	548.21	536.986	-1.25618	5.17613e-07	5.29682e-06	-	Chromosome	3162317	3162745	-	429	protein_coding	- && -	-	198	150	306	253	387	551	632	507	116.235	66.1531	119.465	93.2792	197.452	264.822	258.433	250.759
gene:GYO_3687	985.974	329.327	322.535	367.814	4590.46	1811.33	2121.71	2352.36	-2.44032	5.19121e-07	5.29952e-06	-	Chromosome	3409201	3410466	-	1266	protein_coding	- && PF02518:Histidine kinase-, DNA gyrase B-, and HSP90-like ATPase|PF00512:His Kinase A (phospho-acceptor) domain	HATPase_c	730	335	375	453	3977	1734	2446	2221	145.217	50.0642	49.6104	56.5961	687.589	282.406	338.931	372.238
gene:GYO_0827	116.156	81.5945	392.203	220.039	16.1595	33.4271	32.962	39.1883	2.73359	5.27595e-07	5.37314e-06	-	Chromosome	743884	744621	-	738	protein_coding	- && PF01925:Sulfite exporter TauE/SafE	-	86	83	456	271	14	32	38	37	29.3475	21.2784	103.486	58.0811	4.15221	8.94031	9.03266	10.6378
gene:GYO_3561	19088.7	5387.21	13986	14659	39984.4	58786.9	76909	47997.2	-2.0741	5.32863e-07	5.41384e-06	-	Chromosome	3298177	3299163	-	987	protein_coding	- && PF01380:SIS domain	SIS	14133	5480	16261	18054	34641	56277	88664	45317	3606.17	1050.46	2759.34	2893.2	7682.11	11756.4	15758.6	9742.03
gene:GYO_3154	55.3766	88.476	98.9108	72.2637	26.5478	33.4271	25.1552	22.242	1.56073	5.50704e-07	5.58178e-06	-	Chromosome	2916961	2918151	+	1191	protein_coding	- && PF07690:Major Facilitator Superfamily	MFS_1	41	90	115	89	23	32	29	21	8.66965	14.2971	16.1719	11.8195	4.22691	5.53984	4.27144	3.74122
gene:GYO_2484	44.5714	12.7799	27.523	25.9824	84.2603	98.1922	98.0185	122.861	-1.88297	5.58583e-07	5.64819e-06	-	Chromosome	2331774	2332220	-	447	protein_coding	- && PF10673:Protein of unknown function (DUF2487)	-	33	13	32	32	73	94	113	116	18.5924	5.5024	11.99	11.3231	35.7456	43.359	44.3465	55.0625
gene:GYO_3100	366.026	632.112	973.626	581.357	1874.5	2088.15	1639.42	2170.18	-1.60486	5.6389e-07	5.68834e-06	-	Chromosome	2862335	2863108	-	774	protein_coding	- && PF01012:Electron transfer flavoprotein domain	-	271	643	1132	716	1624	1999	1890	2049	88.1775	157.176	244.952	146.317	459.253	532.514	428.36	561.702
gene:GYO_0662	276.883	214.309	684.635	504.222	1738.3	1798.8	1836.33	1287.92	-1.986	5.7333e-07	5.7699e-06	-	Chromosome	611440	612261	-	822	protein_coding	- && PF05067:Manganese containing catalase	-	205	218	796	621	1506	1722	2117	1216	62.8075	50.1766	162.187	119.493	401.015	431.937	451.791	313.882
gene:GYO_4137	1353.35	1191.48	1168.87	1074.21	563.275	742.709	719.092	584.647	0.874152	5.98746e-07	6.01147e-06	-	Chromosome	3842018	3842536	-	519	protein_coding	- && PF08741:YwhD family	-	1002	1212	1359	1323	488	711	829	552	486.217	441.827	438.558	403.194	205.807	282.463	280.205	225.672
gene:GYO_2069	33.7662	7.86453	28.3831	9.74342	118.888	94.0138	101.488	93.2046	-2.37445	6.2441e-07	6.25439e-06	-	Chromosome	1892548	1893795	+	1248	protein_coding	- && PF02801:Beta-ketoacyl synthase, C-terminal domain|PF00109:Beta-ketoacyl synthase, N-terminal domain	ketoacyl-synt	25	8	33	12	103	90	117	88	5.04493	1.21281	4.42868	1.52086	18.0647	14.8692	16.446	14.9614
gene:GYO_3727	72.9351	205.461	89.4497	153.459	35.7818	27.1596	26.0226	38.1292	2.04225	6.5476e-07	6.54299e-06	-	Chromosome	3446858	3448201	-	1344	protein_coding	- && PF00324:Amino acid permease	AA_permease	54	209	104	189	31	26	30	36	10.1187	29.4214	12.9601	22.2425	5.04858	3.98872	3.91571	5.6834
gene:GYO_3329	736.104	142.545	2531.26	1387.62	9960.03	12309.5	11570.5	14601.3	-3.33567	6.59098e-07	6.57091e-06	mntC	Chromosome	3081825	3083132	-	1308	protein_coding	- && PF00950:ABC 3 transport family	ABC-3	545	145	2943	1709	8629	11784	13339	13786	104.934	20.9738	376.84	206.66	1443.98	1857.56	1788.97	2236.33
gene:GYO_4386	203.948	193.664	247.707	233.842	93.4943	132.664	91.9466	87.9089	1.11695	6.77923e-07	6.7428e-06	-	Chromosome	4079526	4080176	+	651	protein_coding	- && -	-	151	197	288	288	81	127	106	83	58.4151	57.2535	74.0946	69.9734	27.234	40.2237	28.5636	27.0522
gene:GYO_4140	166.13	137.629	132.454	99.87	56.5583	63.7205	52.9126	55.0754	1.22631	7.00949e-07	6.95557e-06	-	Chromosome	3843548	3843967	-	420	protein_coding	- && PF01047:MarR family	MarR	123	140	154	123	49	61	61	52	73.7539	63.066	61.411	46.321	25.5361	29.946	25.4782	26.27
Novel00615	63.4805	0	23.2225	12.1793	1404.72	321.736	413.76	492.502	-4.74544	7.15412e-07	7.08258e-06	-	Chromosome	3823334	3823726	-	393	-	PF11420:Bacteriocin subtilosin A	-	47	0	27	15	1217	308	477	465	30.1186	0	11.5066	6.03699	677.806	161.591	212.919	251.053
gene:GYO_0902	98.5974	77.6623	80.8488	60.0844	185.834	230.856	163.075	162.049	-1.23404	7.17964e-07	7.09136e-06	purE	Chromosome	817351	817839	+	489	protein_coding	- && PF00731:AIR carboxylase	-	73	79	94	74	161	221	188	153	37.5962	30.5657	32.1954	23.9356	72.065	93.1842	67.443	66.3877
gene:GYO_1622	39.1688	71.7639	28.3831	47.0932	9.23401	10.446	8.6742	12.7097	2.18644	7.33554e-07	7.22857e-06	-	Chromosome	1478938	1479498	+	561	protein_coding	- && PF03061:Thioesterase superfamily	4HBT	29	73	33	58	8	10	10	12	13.0186	24.6193	9.85204	16.3526	3.12129	3.67533	3.12698	4.53862
gene:GYO_3377	102.649	158.274	122.133	126.664	47.3243	39.6947	60.7194	59.312	1.2989	7.62864e-07	7.50003e-06	-	Chromosome	3118246	3118824	+	579	protein_coding	- && PF09515:Thiamine transporter protein (Thia_YuaJ)	-	76	161	142	156	41	38	70	56	33.0571	52.6095	41.0757	42.6155	15.4993	13.5321	21.2084	20.5218
gene:GYO_0886	484.883	249.699	376.721	389.737	657.923	1940.86	2070.53	1328.17	-1.9992	7.84979e-07	7.69967e-06	-	Chromosome	801299	802288	-	990	protein_coding	- && PF13170:Protein of unknown function (DUF4003)	-	359	254	438	480	570	1858	2387	1254	91.3248	48.5417	74.0993	76.6881	126.022	386.963	422.966	268.762
gene:GYO_1832	10.8052	3.93227	6.88075	3.24781	66.9466	31.3379	27.7575	31.7743	-2.71308	7.87384e-07	7.7055e-06	-	Chromosome	1663775	1663888	+	114	protein_coding	- && -	-	8	4	8	4	58	30	32	30	17.6732	6.63853	11.7533	5.54979	111.36	54.2594	49.2417	55.8369
gene:GYO_4259	5.4026	4.91533	21.5023	15.4271	48.4786	64.7651	105.825	72.0217	-2.59204	8.25811e-07	8.06302e-06	-	Chromosome	3948907	3950265	-	1359	protein_coding	- && PF02378:Phosphotransferase system, EIIC	-	4	5	25	19	42	62	122	68	0.741259	0.696093	3.08103	2.21134	6.76452	9.40657	15.7481	10.6168
gene:GYO_3190	151.273	168.104	120.413	134.784	72.7178	68.9435	51.1778	67.7852	1.14306	8.70988e-07	8.48466e-06	-	Chromosome	2951468	2951980	-	513	protein_coding	- && PF00994:Probable molybdopterin binding domain	-	112	171	140	166	63	66	59	64	54.9832	63.066	45.7073	51.1814	26.8801	26.5268	20.1754	26.4709
gene:GYO_2489	863.065	1114.8	781.825	802.208	361.281	526.478	426.771	395.06	1.05847	8.79628e-07	8.54926e-06	hisC	Chromosome	2336966	2338048	-	1083	protein_coding	- && PF00155:Aminotransferase class I and II	Aminotran_1_2	639	1134	909	988	313	504	492	373	148.594	198.108	140.576	144.295	63.2591	95.9535	79.6939	73.0778
gene:GYO_4321	521.351	539.704	323.395	361.318	191.606	194.295	164.81	120.742	1.37742	9.08156e-07	8.80642e-06	-	Chromosome	4008967	4010406	-	1440	protein_coding	- && PF03880:DbpA RNA binding domain|PF00270:DEAD/DEAH box helicase|PF00271:Helicase conserved C-terminal domain	DEAD	386	549	376	445	166	186	190	114	67.5078	72.1317	43.7321	48.8787	25.2321	26.6323	23.1462	16.7976
Novel00140	10.8052	5.8984	9.46103	21.1107	207.765	109.683	36.4317	59.312	-3.11528	1.00192e-06	9.6936e-06	-	Chromosome	1069646	1071073	+	1428	-	PF06628:Catalase-related immune-responsive|PF00199:Catalase	Catalase	8	6	11	26	180	105	42	56	1.41088	0.79495	1.29015	2.87983	27.59	15.1607	5.15952	8.3208
gene:GYO_1260	571.325	183.833	1430.34	1217.93	3396.96	6064.94	9490.45	6806.05	-2.91966	1.0047e-06	9.69845e-06	-	Chromosome	1157467	1157967	-	501	protein_coding	- && PF00582:Universal stress protein family	Usp	423	187	1663	1500	2943	5806	10941	6426	212.634	70.6188	555.942	473.56	1285.76	2389.45	3830.96	2721.5
gene:GYO_3117	194.494	127.799	145.356	176.193	285.1	390.68	318.343	370.7	-1.08719	1.04329e-06	1.00481e-05	-	Chromosome	2881941	2882321	-	381	protein_coding	- && PF12681:Glyoxalase-like domain	-	144	130	169	217	247	374	367	350	95.1846	64.5557	74.2911	90.0858	141.899	202.398	168.978	194.916
gene:GYO_1634	413.299	327.361	230.505	180.253	113.117	97.1476	60.7194	76.2583	1.72956	1.07622e-06	1.03419e-05	ohrR	Chromosome	1488419	1488862	-	444	protein_coding	- && PF01047:MarR family	MarR	306	333	268	222	98	93	70	72	173.567	141.898	101.094	79.0846	48.3115	43.1876	27.6569	34.4076
gene:GYO_4232	507.844	428.617	433.487	396.232	174.292	241.302	255.889	173.699	1.05975	1.08348e-06	1.03882e-05	-	Chromosome	3924537	3925724	-	1188	protein_coding	- && PF10672:S-adenosylmethionine-dependent methyltransferase	-	376	436	504	488	151	231	295	164	79.7078	69.4363	71.0541	64.9718	27.8207	40.0917	43.5606	29.2909
gene:GYO_3401	104	65.8655	118.693	56.8366	227.387	235.035	223.794	229.834	-1.41134	1.10238e-06	1.05457e-05	rhaA	Chromosome	3139130	3140404	-	1275	protein_coding	- && PF06134:L-rhamnose isomerase (RhaA)	-	77	67	138	70	197	225	258	217	15.2093	9.94217	18.1277	8.6838	33.8192	36.3857	35.4975	36.1123
gene:GYO_3666	615.896	204.478	1027.81	986.521	2108.82	6076.43	5749.26	3609.56	-2.62944	1.1107e-06	1.06014e-05	-	Chromosome	3392056	3393132	+	1077	protein_coding	- && PF01408:Oxidoreductase family, NAD-binding Rossmann fold|PF02894:Oxidoreductase family, C-terminal alpha/beta domain	GFO_IDH_MocA	456	208	1195	1215	1827	5817	6628	3408	106.63	36.5396	185.835	178.436	371.304	1113.63	1079.58	671.412
gene:GYO_1668	151.273	309.666	88.5897	121.793	46.17	32.3825	24.2878	40.2474	2.23364	1.11879e-06	1.06548e-05	-	Chromosome	1518636	1519289	+	654	protein_coding	- && PF09335:SNARE associated Golgi protein	-	112	315	103	150	40	31	28	38	43.129	91.1275	26.3776	36.2773	13.3872	9.77334	7.51049	12.3285
gene:GYO_4297	236.364	251.665	195.241	194.868	410.913	363.52	383.4	384.469	-0.815848	1.12184e-06	1.066e-05	-	Chromosome	3985510	3985680	+	171	protein_coding	- && -	-	175	256	227	240	356	348	442	363	257.734	283.244	222.333	221.992	455.681	419.606	453.434	450.418
Novel00069	2.7013	1.96613	6.88075	5.68366	72.7178	20.892	38.1665	23.3012	-3.12578	1.1862e-06	1.12464e-05	-	Chromosome	610499	611169	-	671	-	PF07883:Cupin domain|PF16291:Domain of unknown function (DUF4937	Cupin_2	2	2	8	7	63	20	44	22	0.750649	0.563928	1.99684	1.65005	20.5506	6.14563	11.5032	6.95673
gene:GYO_3747	28.3636	17.6952	11.1812	11.3673	65.7923	80.4341	48.5755	57.1937	-1.91599	1.20067e-06	1.13584e-05	-	Chromosome	3465243	3466499	-	1257	protein_coding	- && PF00528:Binding-protein-dependent transport system inner membrane component	BPD_transp_1	21	18	13	14	57	77	56	54	4.2074	2.70928	1.73214	1.76163	9.92537	12.6303	7.81522	9.11515
gene:GYO_3337	1296.62	1823.59	1573.97	1565.44	985.731	860.749	893.443	881.207	0.790394	1.22471e-06	1.156e-05	-	Chromosome	3091174	3092589	-	1416	protein_coding	- && PF00425:chorismate binding enzyme	-	960	1855	1830	1928	854	824	1030	832	170.741	247.855	216.453	215.36	132.008	119.984	127.603	124.671
gene:GYO_2070	16.2078	0.983067	15.4817	5.68366	72.7178	47.0069	89.3443	82.6132	-2.94926	1.24657e-06	1.17403e-05	-	Chromosome	1893796	1895058	+	1263	protein_coding	- && PF08540:Hydroxymethylglutaryl-coenzyme A synthase C terminal|PF01154:Hydroxymethylglutaryl-coenzyme A synthase N terminal	-	12	1	18	7	63	45	103	78	2.3928	0.1498	2.38695	0.87663	10.918	7.34629	14.3061	13.1038
gene:GYO_1739	872.52	944.727	858.374	742.124	505.562	466.935	563.823	515.803	0.734744	1.25613e-06	1.18043e-05	-	Chromosome	1581892	1583184	-	1293	protein_coding	- && PF07690:Major Facilitator Superfamily	MFS_1	646	961	998	914	438	447	650	487	125.824	140.618	129.273	111.807	74.1452	71.28	88.1867	79.9164
gene:GYO_1027	317.403	514.144	359.519	380.805	188.143	165.047	168.28	212.888	1.09972	1.32733e-06	1.24459e-05	-	Chromosome	949581	950882	+	1302	protein_coding	- && PF03600:Citrate transporter	-	235	523	418	469	163	158	194	201	45.4555	75.9989	53.77	56.9749	27.4021	25.021	26.1384	32.756
Novel00507	33.7662	48.1703	51.6056	35.7259	122.351	94.0138	456.263	419.421	-2.68843	1.35994e-06	1.27237e-05	-	Chromosome	3168134	3168667	+	534	-	PF00155:Aminotransferase class I and II	Aminotran_1_2	25	49	60	44	106	90	526	396	11.7904	17.3609	18.8185	13.0327	43.4482	34.7504	172.796	157.347
Novel00526	0	1.96613	2.58028	4.05976	92.3401	19.8474	14.7461	31.7743	-4.11468	1.42129e-06	1.32685e-05	-	Chromosome	3316314	3317214	+	901	-	PF02803:Thiolase, C-terminal domain|PF00108:Thiolase, N-terminal domain	Thiolase_N	0	2	3	5	80	19	17	30	0	0.419973	0.557663	0.877742	19.4345	4.34798	3.30988	7.06483
gene:GYO_0026	402.494	728.453	480.792	363.754	201.994	135.798	195.17	195.941	1.43858	1.42952e-06	1.33162e-05	recR	Chromosome	28940	29536	+	597	protein_coding	- && PF13662:Toprim domain|PF02132:RecR protein	-	298	741	559	448	175	130	225	185	125.71	234.834	156.824	118.693	64.161	44.8981	66.1144	65.751
gene:GYO_0657	40.5195	20.6444	87.7296	103.93	201.994	356.208	504.839	403.534	-2.53065	1.44994e-06	1.34768e-05	-	Chromosome	608685	609137	-	453	protein_coding	- && PF09954:Uncharacterized protein conserved in bacteria (DUF2188)	-	30	21	102	128	175	341	582	381	16.6783	8.77077	37.7118	44.6924	84.5565	155.208	225.379	178.456
gene:GYO_3101	237.714	463.024	635.609	341.02	998.427	1360.07	1350.57	1662.85	-1.67791	1.48394e-06	1.37628e-05	-	Chromosome	2863123	2863899	-	777	protein_coding	- && PF00378:Enoyl-CoA hydratase/isomerase	ECH	176	471	739	420	865	1302	1557	1570	57.0455	114.688	159.294	85.4968	243.67	345.501	351.525	428.73
gene:GYO_1693	16.2078	26.5428	14.6216	23.5466	48.4786	71.0327	71.1285	55.0754	-1.59745	1.51383e-06	1.40095e-05	-	Chromosome	1539767	1540198	+	432	protein_coding	- && -	-	12	27	17	29	42	68	82	52	6.99563	11.8249	6.59083	10.6178	21.2801	32.4552	33.298	25.5402
gene:GYO_4199	243.117	57.0179	202.982	175.381	510.179	885.819	753.788	750.933	-2.09756	1.56589e-06	1.44599e-05	-	Chromosome	3895761	3898181	+	2421	protein_coding	- && PF13860:FlgD Ig-like domain|PF05922:Peptidase inhibitor I9|PF02225:PA domain|PF00082:Subtilase family	Peptidase_S8	180	58	236	216	442	848	869	709	18.7244	4.53262	16.3265	14.1117	39.9608	72.2204	62.967	62.1379
gene:GYO_3489	818.494	256.58	459.29	433.582	51.9413	152.511	101.488	128.156	2.17887	1.60254e-06	1.47351e-05	-	Chromosome	3230654	3232273	-	1620	protein_coding	- && PF13193:AMP-binding enzyme C-terminal domain|PF00501:AMP-binding enzyme	AMP-binding	606	261	534	534	45	146	117	121	94.2078	30.4819	55.2079	52.1372	6.08002	18.5822	12.6695	15.848
gene:GYO_3456	853.611	760.894	587.444	653.621	437.461	319.647	327.018	315.625	1.02821	1.60262e-06	1.47351e-05	-	Chromosome	3193956	3194330	+	375	protein_coding	- && PF03334:Na+/H+ antiporter subunit	-	632	774	683	805	379	306	377	298	424.439	390.505	305.045	339.536	221.215	168.248	176.359	168.613
gene:GYO_2607	93.1948	63.8993	80.8488	89.3147	166.212	195.34	157.871	151.457	-1.03815	1.62905e-06	1.49458e-05	-	Chromosome	2431168	2432199	-	1032	protein_coding	- && PF04229:GrpB protein|PF00583:Acetyltransferase (GNAT) family	Acetyltransf_1	69	65	94	110	144	187	182	143	16.8383	11.9165	15.2554	16.8591	30.5415	37.3612	30.9371	29.401
gene:GYO_1271	637.507	868.048	854.933	617.083	407.451	376.055	369.521	414.125	0.926939	1.64185e-06	1.49983e-05	-	Chromosome	1166622	1167755	+	1134	protein_coding	- && PF04286:Protein of unknown function (DUF445)	-	472	883	994	760	353	360	426	391	104.823	147.321	146.808	106.004	68.1348	65.4558	65.8999	73.1592
gene:GYO_1976	2396.05	1886.51	1552.47	2024.19	4311.13	4310.01	4122.85	3139.3	-1.01548	1.64312e-06	1.49983e-05	fliG	Chromosome	1797706	1798722	+	1017	protein_coding	- && PF14842:FliG N-terminal domain|PF01706:FliG C-terminal domain|PF14841:FliG middle domain	-	1774	1919	1805	2493	3735	4126	4753	2964	439.301	357.002	297.256	387.724	803.853	836.502	819.851	618.39
gene:GYO_2713	507.844	974.219	473.912	448.197	233.159	228.767	184.761	174.759	1.54975	1.64857e-06	1.49983e-05	-	Chromosome	2524625	2525461	-	837	protein_coding	- && PF03099:Biotin/lipoate A/B protein ligase family	BPL_LipA_LipB	376	991	551	552	202	219	213	165	113.134	224.009	110.256	104.312	52.8242	53.9483	44.6419	41.8277
gene:GYO_1382	3242.91	1957.29	1949.83	2447.22	17025.2	6162.08	6562.04	7063.43	-1.93962	1.64886e-06	1.49983e-05	-	Chromosome	1268184	1270868	+	2685	protein_coding	- && PF00082:Subtilase family	Peptidase_S8	2401	1991	2267	3014	14750	5899	7565	6669	225.205	140.295	141.411	177.55	1202.42	452.995	494.257	527.013
gene:GYO_1379	4.05195	1.96613	5.16056	3.24781	28.8563	22.9812	18.2158	18.0054	-2.60319	1.65444e-06	1.50169e-05	-	Chromosome	1266473	1266604	+	132	protein_coding	- && -	-	3	2	6	4	25	22	21	17	5.7237	2.86664	7.61294	4.793	41.4547	34.3643	27.9083	27.3263
gene:GYO_1629	79.6883	93.3913	67.0873	58.4605	21.9308	26.115	34.6968	25.4194	1.45074	1.70621e-06	1.54539e-05	-	Chromosome	1483821	1484138	+	318	protein_coding	- && PF00893:Small Multidrug Resistance protein	-	59	95	78	72	19	25	40	24	46.7255	56.5214	41.0811	35.8119	13.0778	16.2096	22.0659	16.0136
gene:GYO_0624	438.961	290.988	413.705	542.384	210.074	185.938	137.92	150.398	1.30293	1.74495e-06	1.57712e-05	-	Chromosome	573420	574634	+	1215	protein_coding	- && PF01566:Natural resistance-associated macrophage protein	-	325	296	481	668	182	178	159	142	67.3653	46.0927	66.3046	86.9605	32.787	30.2067	22.9567	24.798
gene:GYO_3172	2843.12	4226.2	2618.13	3182.04	1253.52	1527.2	1681.06	1662.85	1.07112	1.75532e-06	1.58313e-05	pfkA	Chromosome	2934723	2935682	-	960	protein_coding	- && PF00365:Phosphofructokinase	PFK	2105	4299	3044	3919	1086	1462	1938	1570	552.218	847.252	531.066	645.693	247.609	314.004	354.137	347.003
gene:GYO_3116	251.221	240.851	214.163	194.868	362.435	416.795	365.184	419.421	-0.799205	1.77087e-06	1.59378e-05	-	Chromosome	2880570	2881904	+	1335	protein_coding	- && PF13183:4Fe-4S dicluster domain|PF02754:Cysteine-rich domain	-	186	245	249	240	314	399	421	396	35.0882	34.7217	31.2387	28.4349	51.482	61.6241	55.3209	62.9389
gene:GYO_1262	83.7403	40.3057	64.507	53.5888	147.744	153.556	154.401	131.334	-1.2895	1.78094e-06	1.59946e-05	-	Chromosome	1158418	1160175	+	1758	protein_coding	- && PF00005:ABC transporter|PF00664:ABC transporter transmembrane region	ABC_membrane	62	41	75	66	128	147	178	124	8.88182	4.41247	7.14525	5.93809	15.9367	17.2408	17.7619	14.9661
gene:GYO_1263	102.649	39.3227	89.4497	82.819	228.542	242.347	189.965	245.721	-1.53167	1.80775e-06	1.62012e-05	-	Chromosome	1160172	1162193	+	2022	protein_coding	- && PF00664:ABC transporter transmembrane region|PF00005:ABC transporter	ABC_membrane	76	40	104	102	198	232	219	232	9.4659	3.74279	8.61444	7.97886	21.4334	23.6573	18.9999	24.3451
gene:GYO_3932	1596.47	1714.47	2081.43	1387.62	775.657	954.763	900.382	968.057	0.913695	1.88975e-06	1.69005e-05	tarB	Chromosome	3649173	3650324	+	1152	protein_coding	- && PF04464:CDP-Glycerol:Poly(glycerophosphate) glycerophosphotransferase	-	1182	1744	2420	1709	672	914	1038	914	258.401	286.425	351.834	234.645	127.68	163.588	158.064	168.345
gene:GYO_3874	89.1429	88.476	40.4244	75.5115	200.84	222.499	170.882	189.587	-1.42325	1.94485e-06	1.73569e-05	-	Chromosome	3590980	3591177	-	198	protein_coding	- && -	-	66	90	47	93	174	213	197	179	83.9476	85.9991	39.7565	74.2916	192.35	221.806	174.538	191.82
gene:GYO_4309	201.247	75.6961	252.007	202.988	492.865	860.749	1139.79	585.706	-2.07274	1.98811e-06	1.77058e-05	-	Chromosome	3996457	3996747	-	291	protein_coding	- && -	-	149	77	293	250	427	824	1314	553	128.95	50.0627	168.636	135.884	321.175	583.839	792.119	403.216
gene:GYO_1850	1069.71	811.03	854.933	750.243	464.009	531.7	486.623	467.082	0.836824	2.01051e-06	1.78679e-05	-	Chromosome	1676327	1677352	+	1026	protein_coding	- && PF13180:PDZ domain|PF05362:Lon protease (S16) C-terminal proteolytic domain	-	792	825	994	924	402	509	561	441	194.405	152.133	162.261	142.445	85.7602	102.289	95.9188	91.2004
Novel00511	58.0779	44.238	60.2066	69.8278	298.951	135.798	212.518	123.92	-1.72835	2.04209e-06	1.80778e-05	-	Chromosome	3189835	3194328	-	4494	-	PF01899:Na+/H+ ion antiporter subunit|PF00420:NADH-ubiquinone/plastoquinone oxidoreductase chain 4L|PF04039:Domain related to MnhB subunit of Na+/H+ antiporter|PF03334:Na+/H+ antiporter subunit|PF00361:Proton-conducting membrane transporter|PF13244:Domain of unknown function (DUF4040)|PF04066:Multiple resistance and pH regulation protein F (MrpF / PhaF)	-	43	45	70	86	259	130	245	117	2.40971	1.89451	2.60879	3.02682	12.6146	5.96443	9.5636	5.52406
gene:GYO_0692	678.026	446.312	1027.81	1334.04	2846.38	2440.18	2792.23	3404.09	-1.71912	2.0505e-06	1.80778e-05	-	Chromosome	638847	639176	+	330	protein_coding	- && PF01740:STAS domain	STAS	502	454	1195	1643	2466	2336	3219	3214	383.106	260.291	606.497	787.491	1635.63	1459.55	1711.18	2066.51
gene:GYO_4287	28.3636	24.5767	89.4497	68.2039	178.909	366.654	371.256	189.587	-2.38568	2.05086e-06	1.80778e-05	-	Chromosome	3976467	3977924	+	1458	protein_coding	- && PF00171:Aldehyde dehydrogenase family	Aldedh	21	25	104	84	155	351	428	179	3.62736	3.24414	11.9468	9.11262	23.2692	49.6373	51.4961	26.0496
gene:GYO_0838	1280.42	1569.96	1780.39	1669.37	550.578	811.653	868.288	817.659	1.04736	2.05111e-06	1.80778e-05	-	Chromosome	754066	755232	-	1167	protein_coding	- && PF07690:Major Facilitator Superfamily	MFS_1	948	1597	2070	2056	477	777	1001	772	204.582	258.911	297.081	278.66	89.4653	137.281	150.471	140.363
gene:GYO_1114	403.844	331.294	381.022	435.206	49.6328	148.333	86.742	158.871	1.80596	2.06984e-06	1.82052e-05	-	Chromosome	1032967	1033998	+	1032	protein_coding	- && PF01032:FecCD transport family	-	299	337	443	536	43	142	100	150	72.9661	61.7827	71.8951	82.1499	9.12002	28.3705	16.9984	30.8402
gene:GYO_2349	384.935	776.623	393.923	319.097	140.819	156.69	174.352	156.753	1.5756	2.09651e-06	1.84017e-05	-	Chromosome	2223330	2223680	-	351	protein_coding	- && PF08830:Protein of unknown function (DUF1806)	-	285	790	458	393	122	150	201	148	204.488	425.83	218.541	177.095	76.0781	88.1136	100.456	89.4664
gene:GYO_0015	3521.14	3457.45	3120.42	2872.68	2130.75	2019.21	1871.89	2196.66	0.658279	2.12808e-06	1.86404e-05	-	Chromosome	19136	20020	+	885	protein_coding	- && PF01680:SOR/SNZ family	-	2607	3517	3628	3538	1846	1933	2158	2074	741.869	751.875	686.592	632.319	456.558	450.347	427.756	497.245
gene:GYO_1276	174.234	206.444	202.982	141.28	75.0263	68.9435	93.6814	94.2637	1.12426	2.16565e-06	1.89306e-05	-	Chromosome	1172307	1173524	-	1218	protein_coding	- && PF00999:Sodium/hydrogen exchanger family	Na_H_Exchanger	129	210	236	174	65	66	108	89	26.673	32.6203	32.4519	22.5956	11.6808	11.1726	15.5548	15.5042
gene:GYO_3844	13.5065	26.5428	35.2638	24.3585	98.1114	57.4529	84.1398	133.452	-1.88632	2.25842e-06	1.9701e-05	-	Chromosome	3560889	3561635	-	747	protein_coding	- && PF16715:Cyclodipeptide synthase	-	10	27	41	30	85	55	97	126	3.37139	6.83848	9.1926	6.35217	24.9061	15.181	22.7792	35.7895
gene:GYO_3488	345.766	123.866	245.127	215.167	32.319	91.9246	36.4317	50.8389	2.13529	2.37742e-06	2.06967e-05	-	Chromosome	3229686	3230621	-	936	protein_coding	- && PF00857:Isochorismatase family|PF00550:Phosphopantetheine attachment site	Isochorismatase	256	126	285	265	28	88	42	48	68.8801	25.469	50.9969	44.7808	6.54771	19.385	7.87157	10.881
gene:GYO_1698	1716.68	6119.59	7566.24	4426.76	410.913	1398.72	1046.11	755.169	2.45714	2.41243e-06	2.09586e-05	-	Chromosome	1544372	1546348	-	1977	protein_coding	- && PF07724:AAA domain (Cdc48 subfamily)|PF10431:C-terminal, D2-small domain, of ClpB protein|PF00004:ATPase family associated with various cellular activities (AAA)|PF02151:UvrB/uvrC motif	AAA	1271	6225	8797	5452	356	1339	1206	713	161.908	595.73	745.252	436.185	39.414	139.647	107.011	76.5223
gene:GYO_4356	124.26	26.5428	289.852	38.9737	16.1595	10.446	5.20452	5.29572	3.70178	2.43388e-06	2.11019e-05	-	Chromosome	4050480	4051229	-	750	protein_coding	- && PF00005:ABC transporter|PF07673:Protein of unknown function (DUF1602)	ABC_tran	92	27	337	48	14	10	6	5	30.8927	6.81113	75.2564	10.1228	4.08577	2.74915	1.40339	1.41454
gene:GYO_3557	683.429	240.851	528.098	528.58	1547.85	1810.29	1863.22	1126.93	-1.68095	2.45969e-06	2.12823e-05	-	Chromosome	3294118	3294972	-	855	protein_coding	- && PF00294:pfkB family carbohydrate kinase	PfkB	506	245	614	651	1341	1733	2148	1064	149.044	54.2146	120.276	120.431	343.297	417.918	440.713	264.047
gene:GYO_1126	105.351	34.4073	209.003	167.262	447.849	851.348	1162.34	594.179	-2.56436	2.48074e-06	2.14209e-05	-	Chromosome	1040907	1041239	+	333	protein_coding	- && PF13630:SdpI/YhfL protein family	-	78	35	243	206	388	815	1340	561	58.9902	19.8857	122.219	97.8464	255.032	504.629	705.909	357.457
gene:GYO_1088	198.546	152.375	432.627	287.431	577.126	1049.82	1129.38	1315.46	-1.92535	2.51065e-06	2.16353e-05	-	Chromosome	1004914	1006497	+	1584	protein_coding	- && PF02378:Phosphotransferase system, EIIC|PF00367:phosphotransferase system, EIIB	-	147	155	503	354	500	1005	1302	1242	23.3718	18.5137	53.1848	35.3484	69.0911	130.819	144.193	166.369
gene:GYO_3583	636.156	1142.32	504.875	626.826	317.419	256.971	252.419	220.302	1.475	2.57938e-06	2.21826e-05	-	Chromosome	3313922	3314278	-	357	protein_coding	- && PF03960:ArsC family	-	471	1162	587	772	275	246	291	208	332.263	615.821	275.388	342.035	168.605	142.078	142.992	123.623
gene:GYO_4076	225.559	396.176	266.629	294.738	137.356	106.549	146.594	131.334	1.1817	2.65719e-06	2.28058e-05	hemK	Chromosome	3783102	3783968	-	867	protein_coding	- && PF13847:Methyltransferase domain	-	167	403	310	363	119	102	169	124	48.5095	87.9432	59.8849	66.2231	30.0424	24.2572	34.1945	30.3464
gene:GYO_4001	144.52	178.918	82.569	131.536	41.553	51.1853	39.9013	57.1937	1.50068	2.68265e-06	2.2978e-05	mscL	Chromosome	3724187	3724579	-	393	protein_coding	- && PF01741:Large-conductance mechanosensitive channel, MscL	-	107	182	96	162	36	49	46	54	68.5679	87.6184	40.9123	65.1995	20.0501	25.7077	20.5331	29.1546
gene:GYO_2159	2783.69	846.421	933.202	893.958	405.142	316.513	202.976	259.49	2.2043	2.72561e-06	2.32991e-05	-	Chromosome	2025817	2026035	+	219	protein_coding	- && PF03672:Uncharacterised protein family (UPF0154)	-	2061	861	1085	1101	351	303	234	245	2370.08	743.833	829.775	795.179	350.809	285.271	187.439	237.371
gene:GYO_4251	3976.31	8574.31	3269.22	4463.3	2111.13	1408.12	1441.65	1288.98	1.69848	2.99677e-06	2.55656e-05	dltA	Chromosome	3940986	3942500	+	1515	protein_coding	- && PF00501:AMP-binding enzyme|PF13193:AMP-binding enzyme C-terminal domain	AMP-binding	2944	8722	3801	5497	1829	1348	1662	1217	489.389	1089.23	420.204	573.898	264.246	183.458	192.445	170.445
gene:GYO_4250	257.974	685.198	149.656	212.731	80.7976	67.8989	58.9846	54.0163	2.31938	3.02647e-06	2.57674e-05	-	Chromosome	3940822	3940971	+	150	protein_coding	- && PF12459:D-Ala-teichoic acid biosynthesis protein	-	191	697	174	262	70	65	68	51	320.68	879.14	194.282	276.269	102.144	89.3472	79.5254	72.1413
gene:GYO_3216	976.52	395.193	608.946	621.955	1627.49	2174.85	1493.7	1896.93	-1.46774	3.03591e-06	2.57961e-05	-	Chromosome	2975207	2976925	-	1719	protein_coding	- && PF13193:AMP-binding enzyme C-terminal domain|PF00501:AMP-binding enzyme	AMP-binding	723	402	708	766	1410	2082	1722	1791	105.923	44.2453	68.9815	70.4814	179.536	249.726	175.73	221.068
gene:GYO_4358	98.5974	20.6444	202.122	45.4693	15.0053	5.22299	7.80678	8.47315	3.33604	3.08846e-06	2.61904e-05	-	Chromosome	4051939	4052766	-	828	protein_coding	- && PF00497:Bacterial extracellular solute-binding proteins, family 3	-	73	21	235	56	13	5	9	8	22.2035	4.7985	47.5349	10.6974	3.43653	1.24508	1.90678	2.05005
gene:GYO_3283	6645.2	7735.75	6145.37	6641.76	3902.52	3468.07	2813.04	4307.54	0.906866	3.09973e-06	2.62337e-05	leuS	Chromosome	3041660	3044074	-	2415	protein_coding	- && PF08264:Anticodon-binding domain of tRNA|PF00133:tRNA synthetases class I (I, L, M and V)|PF09334:tRNA synthetases class I (M)|PF13603:Leucyl-tRNA synthetase, Domain 2	-	4920	7869	7145	8180	3381	3320	3243	4067	513.071	616.48	495.519	535.745	306.433	283.452	235.569	357.324
gene:GYO_3227	1680.21	1941.56	1856.08	1754.63	1168.1	826.277	992.329	1145.99	0.807846	3.12003e-06	2.63531e-05	murC	Chromosome	2985173	2986471	-	1299	protein_coding	- && PF01225:Mur ligase family, catalytic domain|PF08245:Mur ligase middle domain|PF02875:Mur ligase family, glutamate ligase domain	-	1244	1975	2158	2161	1012	791	1144	1082	241.18	287.657	278.239	263.128	170.521	125.553	154.492	176.735
gene:GYO_3303	1081.87	976.185	1125	771.354	573.663	557.815	563.823	502.034	0.847042	3.16502e-06	2.66801e-05	-	Chromosome	3061479	3062135	-	657	protein_coding	- && PF12146:Serine aminopeptidase, S33	-	801	993	1308	950	497	534	650	474	307.041	285.957	333.44	228.707	165.576	167.585	173.555	153.08
gene:GYO_3524	237.714	342.107	219.324	280.935	116.579	142.065	133.583	137.689	1.02732	3.23024e-06	2.71762e-05	-	Chromosome	3261483	3261758	-	276	protein_coding	- && PF06265:Protein of unknown function (DUF1027)	-	176	348	255	346	101	136	154	130	160.595	238.554	154.741	198.284	80.0976	101.599	97.8813	99.94
gene:GYO_3421	360.624	215.292	375.001	352.387	607.136	856.571	699.141	732.927	-1.15198	3.29846e-06	2.76954e-05	-	Chromosome	3161853	3162257	-	405	protein_coding	- && PF08868:YugN-like family	-	267	219	436	434	526	820	806	692	166.03	102.307	180.304	169.495	284.275	417.463	349.115	362.54
gene:GYO_2434	232.312	267.394	457.57	379.181	833.369	754.2	832.724	720.217	-1.2298	3.55203e-06	2.97657e-05	kdgT	Chromosome	2288519	2289511	-	993	protein_coding	- && PF03812:2-keto-3-deoxygluconate permease	-	172	272	532	467	722	722	960	680	43.6223	51.8246	89.7299	74.3857	159.146	149.916	169.594	145.3
gene:GYO_3678	3138.91	3289.34	3557.35	3629.42	5060.24	6348.02	6898.59	5184.51	-0.786864	3.692e-06	3.08779e-05	rnr	Chromosome	3401248	3403587	-	2340	protein_coding	- && PF08206:Ribonuclease B OB domain|PF00575:S1 RNA binding domain|PF00773:RNB domain	RNB	2324	3346	4136	4470	4384	6077	7953	4895	250.121	270.537	296.033	302.144	410.074	535.467	596.216	443.856
gene:GYO_3634	2.7013	3.93227	10.3211	7.30756	13.851	48.0515	66.7914	57.1937	-2.902	3.78529e-06	3.1596e-05	-	Chromosome	3359286	3359696	+	411	protein_coding	- && PF14184:Regulatory protein YrvL	-	2	4	12	9	12	46	77	54	1.22551	1.84134	4.89006	3.46356	6.39067	23.0768	32.8653	27.8777
gene:GYO_2972	4847.48	2771.27	2987.97	2957.94	1760.23	1330.82	1018.35	1380.06	1.30511	3.82039e-06	3.18035e-05	-	Chromosome	2740278	2740751	-	474	protein_coding	- && PF01272:Transcription elongation factor, GreA/GreB, C-term|PF03449:Transcription elongation factor, N-terminal	-	3589	2819	3474	3643	1525	1274	1174	1303	1906.88	1125.21	1227.51	1215.63	704.204	554.179	434.488	583.272
gene:GYO_2946	75.6364	304.751	132.454	152.647	25.3935	28.2042	52.9126	34.9517	2.23045	3.82509e-06	3.18035e-05	-	Chromosome	2715291	2716679	+	1389	protein_coding	- && PF00324:Amino acid permease	AA_permease	56	310	154	188	22	27	61	33	10.1535	42.2256	18.5692	21.4081	3.46679	4.00793	7.70399	5.041
gene:GYO_0523	1705.87	517.093	2510.61	635.758	250.473	298.755	258.491	248.899	2.34518	3.91642e-06	3.24995e-05	-	Chromosome	455615	456571	+	957	protein_coding	- && PF05448:Acetyl xylan esterase (AXE1)	-	1263	526	2919	783	217	286	298	235	332.369	103.99	510.854	129.411	49.6312	61.6188	54.6251	52.1028
gene:GYO_0524	706.39	269.36	706.997	217.603	125.813	101.326	113.632	121.801	2.03786	3.96672e-06	3.28528e-05	-	Chromosome	456656	457438	+	783	protein_coding	- && PF10127:Predicted nucleotidyltransferase	-	523	274	822	268	109	97	131	115	168.217	66.2072	175.827	54.1371	30.47	25.5428	29.3493	31.1632
Novel00540	4.05195	0.983067	5.16056	19.4868	153.515	83.5679	70.2611	36.0109	-3.49991	4.07409e-06	3.36765e-05	-	Chromosome	3392863	3392976	-	114	-	-	-	3	1	6	24	133	80	81	34	6.62744	1.65963	8.81498	33.2988	255.361	144.692	124.643	63.2819
gene:GYO_4263	28.3636	17.6952	43.8648	45.4693	79.6433	102.371	144.859	140.866	-1.77972	4.26087e-06	3.51522e-05	-	Chromosome	3952991	3953581	-	591	protein_coding	- && PF02245:Methylpurine-DNA glycosylase (MPG)	-	21	18	51	56	69	98	167	133	8.94873	5.76238	14.453	14.9873	25.5546	34.1899	49.5698	47.7496
gene:GYO_0596	1519.48	2830.25	1662.56	2132.18	294.334	442.91	535.198	955.347	1.87016	4.38882e-06	3.61173e-05	-	Chromosome	548753	549703	+	951	protein_coding	- && PF01032:FecCD transport family	-	1125	2879	1933	2626	255	424	617	902	297.921	572.767	340.429	436.753	58.6904	91.9273	113.813	201.248
gene:GYO_3402	9.45455	14.746	14.6216	12.9912	31.1648	41.7839	39.0339	43.4249	-1.56681	4.39482e-06	3.61173e-05	rhaU	Chromosome	3140430	3140744	-	315	protein_coding	- && PF05336:Domain of unknown function (DUF718)	-	7	15	17	16	27	40	45	41	5.5965	9.00943	9.03885	8.03399	18.7612	26.1823	25.0605	27.6171
gene:GYO_0531	78.3377	225.122	135.035	122.605	28.8563	33.4271	56.3823	31.7743	1.89485	4.4491e-06	3.64929e-05	-	Chromosome	463933	464835	-	903	protein_coding	- && PF03773:Predicted permease	-	58	229	157	151	25	32	65	30	16.1759	47.9804	29.1197	26.4491	6.05982	7.3067	12.6274	7.04918
gene:GYO_2737	25.6623	5.8984	37.8441	77.1354	166.212	278.908	381.665	258.431	-2.88145	4.54537e-06	3.72108e-05	-	Chromosome	2541431	2542384	-	954	protein_coding	- && PF01544:CorA-like Mg2+ transporter protein	-	19	6	44	95	144	267	440	244	5.01574	1.18992	7.72466	15.7506	33.0386	57.7061	80.9082	54.2684
gene:GYO_3274	16.2078	8.8476	9.46103	4.87171	27.702	48.0515	65.0565	36.0109	-2.21634	4.60281e-06	3.76088e-05	-	Chromosome	3033406	3034305	-	900	protein_coding	- && PF12695:Alpha/beta hydrolase family	-	12	9	11	6	24	46	75	34	3.3579	1.89198	2.04703	1.05446	5.83682	10.5384	14.6186	8.0157
gene:GYO_1427	14.8571	40.3057	11.1812	15.4271	1.15425	0	0.86742	1.05914	4.73821	4.6394e-06	3.78351e-05	-	Chromosome	1309246	1310307	+	1062	protein_coding	- && PF00117:Glutamine amidotransferase class-I|PF00988:Carbamoyl-phosphate synthase small chain, CPSase domain	CPSase_sm_chain	11	41	13	19	1	0	1	1	2.60854	7.30425	2.05019	2.82977	0.206102	0	0.165182	0.199793
gene:GYO_4212	1219.64	671.435	1048.45	1114	1830.64	2533.15	2206.72	2267.63	-1.12494	4.73143e-06	3.85119e-05	galT	Chromosome	3908097	3909638	-	1542	protein_coding	- && PF02744:Galactose-1-phosphate uridyl transferase, C-terminal domain|PF01087:Galactose-1-phosphate uridyl transferase, N-terminal domain	-	903	683	1219	1372	1586	2425	2544	2141	147.48	83.8017	132.402	140.732	225.126	324.255	289.415	294.603
gene:GYO_3575	517.299	689.13	778.385	984.897	368.206	353.074	339.161	324.098	1.10262	4.77929e-06	3.88272e-05	-	Chromosome	3309953	3310621	-	669	protein_coding	- && PF00528:Binding-protein-dependent transport system inner membrane component	BPD_transp_1	383	701	905	1213	319	338	391	306	144.179	198.248	226.567	286.785	104.369	104.172	102.527	97.0511
gene:GYO_3330	661.818	107.154	2095.19	1162.71	7566.12	9241.56	8367.14	8998.48	-3.08491	4.89323e-06	3.96771e-05	-	Chromosome	3083138	3083890	-	753	protein_coding	- && PF00005:ABC transporter|PF07673:Protein of unknown function (DUF1602)	ABC_tran	490	109	2436	1432	6555	8847	9646	8496	163.882	27.3872	541.823	300.794	1905.39	2422.48	2247.19	2394
Novel00496	62.1299	39.3227	78.2685	60.0844	809.13	249.659	173.484	174.759	-2.55144	5.07934e-06	4.11079e-05	-	Chromosome	3118879	3121513	+	2635	-	PF15975:Flotillin|PF01145:SPFH domain / Band 7 family|PF00583:Acetyltransferase (GNAT) family	Acetyltransf_1	46	40	91	74	701	239	200	165	4.3965	2.87208	5.7841	4.44194	58.2297	18.7015	13.3149	13.2864
gene:GYO_4103	78.3377	33.4243	178.039	198.928	352.047	784.493	967.174	819.777	-2.57797	5.09283e-06	4.11389e-05	-	Chromosome	3808447	3809949	-	1503	protein_coding	- && PF13091:PLD-like domain|PF13396:Phospholipase_D-nuclease N-terminal	-	58	34	207	245	305	751	1115	774	9.71848	4.27993	23.0667	25.7827	44.4169	103.024	130.138	109.267
gene:GYO_1946	10.8052	1.96613	3.44037	3.24781	20.7765	32.3825	52.0452	23.3012	-2.81452	5.3718e-06	4.33101e-05	-	Chromosome	1774749	1775234	-	486	protein_coding	- && -	-	8	2	4	4	18	31	60	22	4.14556	0.778593	1.37847	1.3018	8.10669	13.1518	21.6572	9.60487
gene:GYO_4237	143.169	170.071	111.812	117.733	226.233	477.381	362.582	324.098	-1.35947	5.49199e-06	4.41955e-05	-	Chromosome	3928573	3930510	+	1938	protein_coding	- && PF00082:Subtilase family	Peptidase_S8	106	173	130	145	196	457	418	306	13.7747	16.8892	11.2348	11.8341	22.1365	48.6207	37.8365	33.5022
gene:GYO_0945	1164.26	989.948	1103.5	939.428	360.126	533.79	608.062	577.233	1.0121	5.61328e-06	4.50863e-05	-	Chromosome	865576	866352	+	777	protein_coding	- && PF01709:Transcriptional regulator	-	862	1007	1283	1157	312	511	701	545	279.393	245.203	276.554	235.523	87.8903	135.6	158.265	148.827
Novel00560	218.805	106.171	487.673	573.238	1643.65	1292.17	1762.6	2099.22	-2.29298	5.6747e-06	4.54938e-05	-	Chromosome	3531456	3532744	+	1289	-	PF00877:NlpC/P60 family	-	162	108	567	706	1424	1237	2032	1982	31.6513	15.8521	73.6725	86.631	241.804	197.868	276.541	326.254
Novel00522	267.429	195.63	236.526	273.628	4192.24	755.245	981.053	630.19	-2.75252	5.7147e-06	4.57283e-05	-	Chromosome	3294185	3299193	+	5009	-	PF00528:Binding-protein-dependent transport system inner membrane component|PF00294:pfkB family carbohydrate kinase|PF01380:SIS domain|PF01547:Bacterial extracellular solute-binding protein	SBP_bac_1	198	199	275	337	3632	723	1131	595	9.95505	7.51655	9.1951	10.6414	158.709	29.7609	39.6095	25.2041
gene:GYO_0352	1077.82	1013.54	1206.71	1518.35	409.759	724.951	471.009	534.867	1.1703	5.86316e-06	4.68282e-05	-	Chromosome	295093	296103	-	1011	protein_coding	- && PF01032:FecCD transport family	-	798	1031	1403	1870	355	694	543	505	198.784	192.941	232.424	292.558	76.8572	141.536	94.2186	105.985
gene:GYO_0556	104	178.918	147.936	107.99	244.701	326.959	319.211	308.211	-1.15219	6.03965e-06	4.81475e-05	nucA	Chromosome	487775	488212	-	438	protein_coding	- && PF14040:Deoxyribonuclease NucA/NucB	-	77	182	172	133	212	313	368	291	44.2737	78.6165	65.7702	48.0285	105.942	147.343	147.388	140.969
gene:GYO_1630	836.052	1566.03	823.11	951.607	479.014	457.534	391.207	455.432	1.22843	6.45246e-06	5.13423e-05	purU	Chromosome	1484209	1485111	+	903	protein_coding	- && PF00551:Formyl transferase|PF01842:ACT domain	ACT	619	1593	957	1172	415	438	451	430	172.636	333.768	177.5	205.287	100.593	100.01	87.6147	101.038
gene:GYO_4254	5898.29	9265.4	4414.86	6297.49	3327.71	1892.81	2175.49	2495.34	1.38747	6.56531e-06	5.21427e-05	-	Chromosome	3943937	3945115	+	1179	protein_coding	- && PF04915:DltD N-terminal region|PF04914:DltD C-terminal region|PF04918:DltD central region	-	4367	9425	5133	7756	2883	1812	2508	2356	932.822	1512.46	729.176	1040.51	535.227	316.886	373.166	424.001
gene:GYO_3937	852.26	1288.8	674.313	931.308	1769.47	2502.86	2199.78	1948.82	-1.16845	6.58728e-06	5.22198e-05	lytD	Chromosome	3655238	3657880	-	2643	protein_coding	- && PF08239:Bacterial SH3 domain|PF01832:Mannosyl-glycoprotein endo-beta-N-acetylglucosaminidase	SH3_3	631	1311	784	1147	1533	2396	2536	1840	60.1259	93.8474	49.6814	68.6417	126.956	186.917	168.322	147.715
gene:GYO_2643	190.442	284.106	92.8901	193.244	63.4838	53.2745	69.3936	46.6023	1.70641	6.73267e-06	5.32732e-05	-	Chromosome	2460991	2461758	-	768	protein_coding	- && PF00497:Bacterial extracellular solute-binding proteins, family 3	-	141	289	108	238	55	51	80	44	46.2367	71.1956	23.5525	49.016	15.675	13.692	18.2733	12.1562
gene:GYO_4284	2.7013	3.93227	5.16056	2.43585	15.0053	29.2488	32.962	14.828	-2.68598	6.88423e-06	5.43714e-05	-	Chromosome	3973338	3974066	-	729	protein_coding	- && PF02535:ZIP Zinc transporter	-	2	4	6	3	13	28	38	14	0.690927	1.03812	1.37847	0.650902	3.90322	7.91935	9.14417	4.0748
gene:GYO_4220	513.247	425.668	616.687	543.195	283.946	298.755	268.9	327.275	0.833397	6.93788e-06	5.46936e-05	-	Chromosome	3915504	3916754	-	1251	protein_coding	- && PF04261:Dyp-type peroxidase family	-	380	433	717	669	246	286	310	309	76.499	65.4858	95.9924	84.5845	43.0413	47.1376	43.4703	52.4091
gene:GYO_2605	294.442	193.664	123.853	133.972	70.4093	51.1853	50.3104	70.9626	1.61627	6.99842e-06	5.50689e-05	-	Chromosome	2430595	2430834	-	240	protein_coding	- && PF10827:Protein of unknown function (DUF2552)	-	218	197	144	165	61	49	58	67	228.757	155.3	100.491	108.741	55.6321	42.0963	42.3941	59.2337
gene:GYO_4397	79.6883	28.5089	43.8648	42.2215	147.744	125.352	433.71	207.592	-2.24398	7.13934e-06	5.60741e-05	-	Chromosome	4090855	4092063	-	1209	protein_coding	- && PF04235:Protein of unknown function (DUF418)	-	59	29	51	52	128	120	500	196	12.2901	4.53825	7.06511	6.80297	23.1735	20.4651	72.5491	34.3981
gene:GYO_2241	868.468	362.752	378.441	452.257	1329.7	1407.07	1461.6	1496.57	-1.46779	7.17802e-06	5.62741e-05	-	Chromosome	2134885	2136570	-	1686	protein_coding	- && PF00015:Methyl-accepting chemotaxis protein (MCP) signalling domain|PF00672:HAMP domain	HAMP	643	369	440	557	1152	1347	1685	1413	96.0468	41.4081	43.7089	52.254	149.555	164.729	175.32	177.824
gene:GYO_3746	20.2597	2.9492	7.74084	8.11951	41.553	51.1853	47.7081	37.07	-2.24128	7.22105e-06	5.65073e-05	-	Chromosome	3464388	3465239	-	852	protein_coding	- && PF00528:Binding-protein-dependent transport system inner membrane component	BPD_transp_1	15	3	9	10	36	49	55	35	4.43385	0.66619	1.7692	1.85645	9.24847	11.8581	11.3243	8.71633
gene:GYO_2338	26074.3	19370.3	16545.6	21060.4	42835.4	45727.3	33604.7	37973.5	-0.947318	7.68396e-06	6.00195e-05	sucB	Chromosome	2208519	2209772	-	1254	protein_coding	- && PF00198:2-oxoacid dehydrogenases acyltransferase (catalytic domain)|PF02817:e3 binding domain|PF00364:Biotin-requiring enzyme	Biotin_lipoyl	19305	19704	19237	25938	37111	43775	38741	35853	3877.05	2972.85	2569.3	3271.6	6477.57	7197.6	5419.53	6066.43
gene:GYO_0525	4546.29	1349.75	1949.83	2439.1	9071.26	10604.8	8912.75	6654.6	-1.77711	7.85952e-06	6.12447e-05	-	Chromosome	457782	458537	+	756	protein_coding	- && PF01619:Proline dehydrogenase	-	3366	1373	2267	3004	7859	10152	10275	6283	1121.3	343.61	502.232	628.492	2275.37	2768.78	2384.23	1763.4
gene:GYO_2965	832	83.5607	1287.56	199.74	80.7976	51.1853	63.3217	61.4303	3.22659	7.86959e-06	6.12447e-05	yrhB	Chromosome	2733790	2734929	-	1140	protein_coding	- && PF01053:Cys/Met metabolism PLP-dependent enzyme	Cys_Met_Meta_PP	616	85	1497	246	70	49	73	58	136.083	14.1069	219.934	34.1312	13.44	8.86238	11.2333	10.7951
gene:GYO_2936	1256.1	1089.24	1127.58	1070.15	345.121	623.625	523.055	645.018	1.08756	8.48402e-06	6.5906e-05	-	Chromosome	2705887	2706396	+	510	protein_coding	- && PF01965:DJ-1/PfpI family	DJ-1_PfpI	930	1108	1311	1318	299	597	603	609	459.243	411.042	430.534	408.759	128.324	241.359	207.413	253.368
Novel00508	13.5065	7.86453	6.88075	4.87171	30.0105	19.8474	74.5982	87.9089	-2.71658	9.00531e-06	6.98281e-05	-	Chromosome	3168881	3169042	+	162	-	-	-	10	8	8	6	26	19	86	83	15.5458	9.34311	8.27085	5.85812	35.129	24.1823	93.1261	108.71
gene:GYO_3501	16.2078	16.7121	14.6216	13.8032	47.3243	65.8097	40.7688	32.8334	-1.61132	9.05139e-06	7.00578e-05	-	Chromosome	3241735	3241920	-	186	protein_coding	- && -	-	12	17	17	17	41	63	47	31	16.2479	17.2923	15.3077	14.4563	48.2479	69.8372	44.3275	35.3634
gene:GYO_1869	822.546	823.81	994.268	975.154	451.312	378.145	328.752	584.647	1.05408	9.15164e-06	7.07051e-05	murB	Chromosome	1696241	1697152	+	912	protein_coding	- && PF01565:FAD binding domain|PF02873:UDP-N-acetylenolpyruvoylglucosamine reductase, C-terminal domain	FAD_binding_4	609	838	1156	1201	391	362	379	552	168.171	173.846	212.294	208.291	93.8402	81.8413	72.9008	128.425
gene:GYO_1680	252.572	141.562	151.376	155.895	363.589	471.114	419.832	329.394	-1.18122	9.58893e-06	7.39494e-05	-	Chromosome	1530152	1530649	+	498	protein_coding	- && PF02870:6-O-methylguanine DNA methyltransferase, ribonuclease-like domain|PF01035:6-O-methylguanine DNA methyltransferase, DNA binding domain	DNA_binding_1	187	144	176	192	315	451	484	311	94.5674	54.7079	59.1914	60.9809	138.449	186.727	170.492	132.506
gene:GYO_0083	394.39	767.775	453.269	481.487	248.164	243.391	227.264	193.823	1.20092	9.68318e-06	7.45412e-05	-	Chromosome	79167	79943	+	777	protein_coding	- && PF03309:Type III pantothenate kinase	-	292	781	527	593	215	233	262	183	94.6436	190.172	113.596	120.713	60.5654	61.8292	59.1519	49.973
gene:GYO_3209	59.4286	22.6105	39.5643	23.5466	87.7231	114.906	140.522	112.269	-1.67007	9.72819e-06	7.47526e-05	-	Chromosome	2969403	2970026	-	624	protein_coding	- && PF00440:Bacterial regulatory proteins, tetR family	TetR_N	44	23	46	29	76	110	162	106	17.7581	6.97364	12.3466	7.35081	26.6585	36.3469	45.5427	36.0435
gene:GYO_4553	2225.87	1069.58	1799.32	1354.33	3420.05	4944.08	4658.05	3245.21	-1.33525	9.86484e-06	7.5666e-05	-	Chromosome	832412	834154	+	1743	protein_coding	- && PF13382:Adenine deaminase C-terminal domain|PF01979:Amidohydrolase family	Amidohydro_1	1648	1088	2092	1668	2963	4733	5370	3064	238.116	118.099	201.02	151.363	372.084	559.884	540.462	372.99
gene:GYO_3085	672.624	1075.48	1121.56	960.538	328.962	406.349	498.767	511.566	1.1338	9.98062e-06	7.64163e-05	murI	Chromosome	2849166	2849981	-	816	protein_coding	- && PF01177:Asp/Glu/Hydantoin racemase	Asp_Glu_race	498	1094	1304	1183	285	389	575	483	153.698	253.655	267.647	229.306	76.4473	98.2921	123.613	125.592
gene:GYO_0400	83.7403	12.7799	171.159	174.57	547.115	828.366	1287.25	681.029	-2.91672	1.02051e-05	7.79951e-05	-	Chromosome	338038	339291	+	1254	protein_coding	- && PF00067:Cytochrome P450	p450	62	13	199	215	474	793	1484	643	12.4516	1.96138	26.5785	27.1183	82.7348	130.387	207.599	108.797
gene:GYO_1793	588.883	792.352	476.492	380.805	212.382	287.265	209.048	175.818	1.33896	1.03883e-05	7.91284e-05	-	Chromosome	1629581	1630135	-	555	protein_coding	- && PF01327:Polypeptide deformylase	Pep_deformylase	436	806	554	469	184	275	241	166	197.844	274.763	167.183	133.66	72.5658	102.164	76.175	63.463
gene:GYO_3431	170.182	248.716	128.154	116.109	61.1753	75.2111	52.0452	52.9572	1.45737	1.03906e-05	7.91284e-05	-	Chromosome	3170576	3170836	-	261	protein_coding	- && PF08958:Domain of unknown function (DUF1871)	-	126	253	149	143	53	72	60	50	121.579	183.399	95.6138	86.6597	44.447	56.8789	40.3273	40.6476
gene:GYO_2651	5726.76	4671.53	5711.02	6149.72	9957.73	10240.2	7758.21	10831.9	-0.801151	1.05144e-05	7.99279e-05	-	Chromosome	2469044	2470468	-	1425	protein_coding	- && PF02852:Pyridine nucleotide-disulphide oxidoreductase, dimerisation domain|PF07992:Pyridine nucleotide-disulphide oxidoreductase	Pyr_redox_2	4240	4752	6640	7574	8627	9803	8944	10227	749.343	630.926	780.42	840.683	1325.11	1418.41	1101.05	1522.79
gene:GYO_4310	280.935	52.1025	704.417	677.979	2126.13	3901.57	4739.59	2577.95	-2.95912	1.05895e-05	8.03559e-05	-	Chromosome	3996797	3998857	-	2061	protein_coding	- && PF06628:Catalase-related immune-responsive|PF00199:Catalase|PF01965:DJ-1/PfpI family	Catalase	208	53	819	835	1842	3735	5464	2434	25.4164	4.86535	66.555	64.0811	195.623	373.656	465.073	250.581
gene:GYO_0903	174.234	220.207	138.475	210.295	451.312	448.133	417.229	292.324	-1.11386	1.06184e-05	8.04313e-05	purK	Chromosome	817832	818974	+	1143	protein_coding	- && PF02222:ATP-grasp domain	-	129	224	161	259	391	429	481	276	28.4232	37.0782	23.5914	35.8406	74.8752	77.3874	73.8222	51.2352
gene:GYO_3215	1072.42	1774.44	1364.11	1475.32	715.636	721.817	581.172	831.427	0.997332	1.07424e-05	8.12263e-05	tyrS	Chromosome	2973599	2974867	-	1269	protein_coding	- && PF01479:S4 domain|PF00579:tRNA synthetases class I (W and Y)	S4	794	1805	1586	1817	620	691	670	785	157.575	269.111	209.323	226.472	106.939	112.273	92.6193	131.254
gene:GYO_4257	4.05195	9.83067	30.9634	19.4868	86.5688	90.88	64.1891	73.0809	-2.25737	1.07944e-05	8.14749e-05	-	Chromosome	3947231	3948559	-	1329	protein_coding	- && PF11975:Family 4 glycosyl hydrolase C-terminal domain|PF02056:Family 4 glycosyl hydrolase	-	3	10	36	24	75	87	74	69	0.568494	1.42361	4.53683	2.85633	12.3522	13.4975	9.76776	11.0161
gene:GYO_0761	249.87	616.383	593.465	475.804	156.978	147.288	215.12	99.5595	1.64473	1.12791e-05	8.49826e-05	-	Chromosome	691159	692466	+	1308	protein_coding	- && PF02040:Arsenical pump membrane protein	ArsB	185	627	690	586	136	141	248	94	35.62	90.6935	88.352	70.8617	22.7582	22.2265	33.2608	15.2484
gene:GYO_4273	21.6104	22.6105	23.2225	38.9737	56.5583	68.9435	104.958	79.4357	-1.53263	1.14463e-05	8.60358e-05	-	Chromosome	3961154	3961984	-	831	protein_coding	- && PF01256:Carbohydrate kinase	-	16	23	27	48	49	66	121	75	4.84896	5.23653	5.44174	9.13612	12.9063	16.3758	25.543	19.1499
gene:GYO_4359	31.0649	4.91533	43.8648	13.8032	1.15425	1.0446	0	1.05914	4.90515	1.14593e-05	8.60358e-05	-	Chromosome	4052756	4053253	-	498	protein_coding	- && PF00583:Acetyltransferase (GNAT) family	Acetyltransf_1	23	5	51	17	1	1	0	1	11.6313	1.89958	17.152	5.39935	0.439519	0.414028	0	0.426065
gene:GYO_2595	226.909	606.552	183.2	214.355	63.4838	83.5679	97.1511	76.2583	1.94016	1.17388e-05	8.79787e-05	-	Chromosome	2422536	2422886	+	351	protein_coding	- && PF01381:Helix-turn-helix	HTH_3	168	617	213	264	55	80	112	72	120.54	332.579	101.636	118.965	34.2975	46.9939	55.9756	43.5242
gene:GYO_3067	43227.5	40394.2	22491.5	29736.1	18843.2	12737.8	11592.2	11972.6	1.30069	1.21371e-05	9.08042e-05	tig	Chromosome	2832243	2833517	-	1275	protein_coding	- && PF05698:Bacterial trigger factor protein (TF) C-terminus|PF00254:FKBP-type peptidyl-prolyl cis-trans isomerase|PF05697:Bacterial trigger factor protein (TF)	FKBP_C	32005	41090	26150	36623	16325	12194	13364	11304	6321.75	6097.37	3435.08	4543.24	2802.53	1971.95	1838.72	1881.17
gene:GYO_0890	47.2727	21.6275	58.4864	45.4693	137.356	151.467	104.958	103.796	-1.52292	1.21641e-05	9.08467e-05	gabP	Chromosome	804081	805487	-	1407	protein_coding	- && PF00324:Amino acid permease	AA_permease	35	22	68	56	119	145	121	98	6.26474	2.95832	8.0945	6.29529	18.5123	21.2487	15.0862	14.7787
gene:GYO_3490	975.169	295.903	452.409	479.051	40.3988	190.117	85.8746	121.801	2.32839	1.22785e-05	9.15406e-05	-	Chromosome	3232302	3233498	-	1197	protein_coding	- && PF00425:chorismate binding enzyme	-	722	301	526	590	35	182	99	115	151.905	47.5761	73.5981	77.9614	6.40002	31.3499	14.5087	20.3849
gene:GYO_2068	0	0	0	0	5.77126	12.5352	14.7461	4.23657	-5.6992	1.23626e-05	9.20062e-05	-	Chromosome	1892322	1892570	+	249	protein_coding	- && PF00550:Phosphopantetheine attachment site	PP-binding	0	0	0	0	5	12	17	4	0	0	0	0	4.39519	9.93667	11.9767	3.40852
gene:GYO_4406	101.299	73.73	183.2	164.014	273.558	481.56	550.812	356.931	-1.66811	1.2533e-05	9.31116e-05	-	Chromosome	4098650	4099681	-	1032	protein_coding	- && PF04230:Polysaccharide pyruvyl transferase	-	75	75	213	202	237	461	635	337	18.3025	13.7499	34.5681	30.9595	50.2662	92.1044	107.94	69.2876
gene:GYO_0980	1827.43	1832.44	1345.19	1693.73	1045.75	501.407	567.293	488.265	1.36425	1.27447e-05	9.45017e-05	-	Chromosome	901071	901715	+	645	protein_coding	- && PF01027:Inhibitor of apoptosis-promoting Bax1	-	1353	1864	1564	2086	906	480	654	461	528.284	546.768	406.118	511.536	307.451	153.441	177.871	151.651
gene:GYO_2124	264.727	165.155	132.454	149.399	70.4093	81.4787	75.4656	61.4303	1.29465	1.27645e-05	9.45017e-05	dut	Chromosome	2001463	2001897	+	435	protein_coding	- && PF00692:dUTPase	-	196	168	154	184	61	78	87	58	113.474	73.0696	59.2934	66.9037	30.6936	36.9713	35.0847	28.2907
gene:GYO_2964	405.195	71.7639	282.111	112.861	42.7073	44.9177	27.7575	47.6614	2.41873	1.28021e-05	9.46154e-05	-	Chromosome	2733477	2733707	-	231	protein_coding	- && PF14143:YrhC-like protein	-	300	73	328	139	37	43	32	45	327.068	59.7898	237.814	95.1754	35.0588	38.3809	24.3011	41.3338
gene:GYO_3136	18668.7	22368.7	11714.5	17096.4	9429.08	8289.93	8407.04	7782.58	1.04256	1.30131e-05	9.58822e-05	rplT	Chromosome	2900175	2900534	-	360	protein_coding	- && PF00453:Ribosomal protein L20	-	13822	22754	13620	21056	8169	7936	9692	7348	9669.36	11958.4	6336.5	9251.14	4966.76	4545.25	4722.8	4330.84
gene:GYO_2266	120.208	57.0179	57.6263	51.1529	122.351	310.246	326.15	274.318	-1.86263	1.30185e-05	9.58822e-05	-	Chromosome	2155280	2156170	-	891	protein_coding	- && PF02517:CAAX protease self-immunity	-	89	58	67	63	106	297	376	259	25.156	12.3159	12.5942	11.1837	26.0397	68.7286	74.0284	61.6776
gene:GYO_1056	101.299	49.1533	178.039	173.758	259.707	657.052	631.482	571.937	-2.07555	1.30776e-05	9.61507e-05	-	Chromosome	974837	975157	+	321	protein_coding	- && -	-	75	50	207	214	225	629	728	540	58.8418	29.4701	108.004	105.446	153.421	404.022	397.846	356.939
gene:GYO_0871	13.5065	9.83067	16.3418	24.3585	90.0316	66.8543	29.4923	110.151	-2.19574	1.31605e-05	9.65937e-05	-	Chromosome	786297	787430	+	1134	protein_coding	- && PF00107:Zinc-binding dehydrogenase|PF08240:Alcohol dehydrogenase GroES-like domain	ADH_zinc_N	10	10	19	30	78	64	34	104	2.22084	1.66841	2.80618	4.18437	15.0553	11.6366	5.25962	19.4592
gene:GYO_0629	217.455	173.02	237.386	220.851	108.5	105.504	135.318	110.151	0.882963	1.32565e-05	9.71308e-05	ycsK	Chromosome	578041	578682	+	642	protein_coding	- && PF00657:GDSL-like Lipase/Acylhydrolase	Lipase_GDSL	161	176	276	272	94	101	156	104	63.1568	51.8674	72.0027	67.0125	32.0479	32.4373	42.6263	34.3719
gene:GYO_0695	1927.38	591.806	3325.98	3519	8468.74	12156	13781.6	9501.57	-2.22914	1.36707e-05	9.99932e-05	-	Chromosome	640409	641008	+	600	protein_coding	- && PF07228:Stage II sporulation protein E (SpoIIE)	SpoIIE	1427	602	3867	4334	7337	11637	15888	8971	598.966	189.829	1079.44	1142.51	2676.54	3998.98	4645.22	3172.45
gene:GYO_3202	1243.95	1607.31	1298.74	1274.76	885.311	845.08	772.872	897.094	0.674435	1.37343e-05	0.000100287	-	Chromosome	2960634	2962223	-	1590	protein_coding	- && PF13193:AMP-binding enzyme C-terminal domain|PF00501:AMP-binding enzyme	AMP-binding	921	1635	1510	1570	767	809	891	847	145.879	194.553	159.058	156.18	105.586	104.908	98.3035	113.029
gene:GYO_0393	47.2727	15.7291	12.9014	20.2988	61.1753	103.415	96.2837	123.92	-2.02942	1.38194e-05	0.000100735	-	Chromosome	332587	333444	-	858	protein_coding	- && -	-	35	16	15	25	53	99	111	117	10.2733	3.52817	2.92805	4.60866	13.5206	23.7907	22.6947	28.9337
gene:GYO_4015	59.4286	73.73	110.092	108.801	28.8563	38.6501	37.2991	31.7743	1.37139	1.43795e-05	0.000104571	amt	Chromosome	3737717	3738931	+	1215	protein_coding	- && PF00909:Ammonium Transporter Family	Ammonium_transp	44	75	128	134	25	37	43	30	9.12023	11.6789	17.6445	17.4442	4.50372	6.27891	6.20841	5.23902
Novel00542	33.7662	26.5428	24.9427	34.9139	378.594	92.9692	92.814	84.7315	-2.43318	1.43961e-05	0.000104571	-	Chromosome	3401246	3402362	+	1117	-	PF00575:S1 RNA binding domain|PF00773:RNB domain	RNB	25	27	29	43	328	89	107	80	5.63659	4.57327	4.3483	6.08887	64.2729	16.4284	16.8042	15.1964
gene:GYO_1888	968.416	1015.51	1045.01	934.556	690.242	678.989	664.444	747.755	0.511402	1.44193e-05	0.000104571	-	Chromosome	1714900	1715172	+	273	protein_coding	- && PF02325:YGGT family	-	717	1033	1215	1151	598	650	766	706	661.433	715.903	745.399	666.86	479.453	490.919	492.214	548.716
gene:GYO_3497	1160.21	870.997	1170.59	1118.87	1536.31	2317.96	2025.43	2180.78	-0.899809	1.45269e-05	0.00010505	-	Chromosome	3238435	3239937	-	1503	protein_coding	- && PF02789:Cytosol aminopeptidase family, N-terminal domain|PF00883:Cytosol aminopeptidase family, catalytic domain	-	859	886	1361	1378	1331	2219	2335	2059	143.934	111.53	151.661	145.015	193.832	304.409	272.531	290.672
gene:GYO_4377	244.468	236.919	152.237	248.457	783.737	580.797	393.809	452.254	-1.32576	1.45348e-05	0.00010505	-	Chromosome	4068451	4069485	-	1035	protein_coding	- && PF02894:Oxidoreductase family, C-terminal alpha/beta domain|PF01408:Oxidoreductase family, NAD-binding Rossmann fold	GFO_IDH_MocA	181	241	177	306	679	556	454	427	44.0421	44.0548	28.6423	46.763	143.594	110.763	76.9491	87.5372
gene:GYO_2401	290.39	226.105	295.872	253.329	367.052	625.714	651.433	681.029	-1.12671	1.47692e-05	0.000106564	-	Chromosome	2261135	2261809	+	675	protein_coding	- && PF08461:Ribonuclease R winged-helix domain	-	215	230	344	312	318	599	751	643	80.2166	64.4675	85.3551	73.1093	103.117	182.971	195.175	202.121
gene:GYO_3380	1112.94	536.754	1389.05	883.403	1669.05	4338.22	3400.29	3650.87	-1.73534	1.48521e-05	0.00010698	-	Chromosome	3120962	3121537	-	576	protein_coding	- && -	-	824	546	1615	1088	1446	4153	3920	3447	360.275	179.344	469.597	298.764	549.481	1486.61	1193.86	1269.77
gene:GYO_4240	278.234	27.5259	473.912	453.069	1385.1	2751.47	3797.57	2071.68	-3.02049	1.49192e-05	0.000107282	-	Chromosome	3933287	3934147	-	861	protein_coding	- && PF01501:Glycosyl transferase family 8	Glyco_transf_8	206	28	551	558	1200	2634	4378	1956	60.2551	6.15278	107.182	102.507	305.06	630.771	891.992	482.027
gene:GYO_0694	2500.05	857.234	4438.94	4718.25	10681.4	14804	17114.2	12980.9	-2.15089	1.50738e-05	0.000108211	sigB	Chromosome	639621	640409	+	789	protein_coding	- && PF04539:Sigma-70 region 3|PF04545:Sigma-70, region 4|PF04542:Sigma-70 region 2	Sigma70_r3	1851	872	5161	5811	9254	14172	19730	12256	590.825	209.101	1095.55	1164.92	2567.2	3703.51	4386.7	3295.92
gene:GYO_4252	4654.34	8761.09	3842.04	5228.15	2854.46	1653.6	1782.55	1931.88	1.45147	1.5428e-05	0.000110568	-	Chromosome	3942497	3943684	+	1188	protein_coding	- && PF03062:MBOAT, membrane-bound O-acyltransferase family	MBOAT	3446	8912	4467	6439	2473	1583	2055	1824	730.513	1419.3	629.759	857.282	455.633	274.741	303.448	325.772
gene:GYO_1059	91.8442	42.2719	215.884	248.457	429.381	920.291	1099.89	741.4	-2.4124	1.57762e-05	0.000112873	cax	Chromosome	977552	978607	+	1056	protein_coding	- && PF01699:Sodium/calcium exchanger protein	Na_Ca_ex	68	43	251	306	372	881	1268	700	16.2171	7.70408	39.8093	45.8331	77.1057	172.017	210.641	140.65
gene:GYO_3745	72.9351	25.5597	39.5643	31.6661	226.233	207.875	101.488	109.092	-1.93721	1.58517e-05	0.000113222	-	Chromosome	3462306	3464369	-	2064	protein_coding	- && PF02449:Beta-galactosidase|PF08533:Beta-galactosidase C-terminal domain|PF08532:Beta-galactosidase trimerisation domain	-	54	26	46	39	196	199	117	103	6.58891	2.38331	3.7327	2.98866	20.7852	19.8794	9.94407	10.5885
gene:GYO_4409	310.649	2906.93	608.946	775.414	115.425	190.117	142.257	227.716	2.76829	1.65227e-05	0.000117818	gntK	Chromosome	4101840	4103381	+	1542	protein_coding	- && PF00370:FGGY family of carbohydrate kinases, N-terminal domain|PF02782:FGGY family of carbohydrate kinases, C-terminal domain	FGGY_N	230	2957	708	955	100	182	164	215	37.5641	362.814	76.8996	97.9582	14.1946	24.3358	18.6573	29.5842
gene:GYO_1429	76.987	128.782	30.9634	50.341	5.77126	12.5352	16.481	19.0646	2.40386	1.66903e-05	0.000118814	argF	Chromosome	1313380	1314339	+	960	protein_coding	- && PF00185:Aspartate/ornithine carbamoyltransferase, Asp/Orn binding domain|PF02729:Aspartate/ornithine carbamoyltransferase, carbamoyl-P binding domain	-	57	131	36	62	5	12	19	18	14.9532	25.8176	6.28067	10.2151	1.14	2.57732	3.47193	3.97838
gene:GYO_1733	409.247	203.495	291.572	280.935	596.748	812.697	701.743	560.287	-1.17512	1.70163e-05	0.000120932	kinA	Chromosome	1576769	1578589	+	1821	protein_coding	- && PF00512:His Kinase A (phospho-acceptor) domain|PF08447:PAS fold|PF02518:Histidine kinase-, DNA gyrase B-, and HSP90-like ATPase|PF00989:PAS fold	HATPase_c	303	207	339	346	517	778	809	529	41.9046	21.5069	31.1792	30.053	62.1424	88.0904	77.934	61.6384
gene:GYO_1831	4114.08	4693.16	3838.6	3903.05	2268.1	2906.07	2705.48	2241.15	0.709217	1.74692e-05	0.000123944	-	Chromosome	1662816	1663733	+	918	protein_coding	- && PF01040:UbiA prenyltransferase family	UbiA	3046	4774	4463	4807	1965	2782	3119	2116	835.635	983.912	814.253	828.234	468.519	624.847	596.02	489.078
gene:GYO_0674	956.26	361.769	512.616	1265.83	47.3243	132.664	71.1285	265.845	2.58268	1.76832e-05	0.000125253	-	Chromosome	623466	623630	-	165	protein_coding	- && PF13076:Fur-regulated basic protein A	-	708	368	596	1559	41	127	82	251	1080.63	421.969	604.975	1494.46	54.3885	158.701	87.1802	322.771
gene:GYO_3407	1203.43	1413.65	992.548	1152.16	1917.21	2522.7	2284.79	1841.85	-0.847568	1.77222e-05	0.000125321	-	Chromosome	3147367	3149352	-	1986	protein_coding	- && PF02203:Tar ligand binding domain homologue|PF00672:HAMP domain|PF02743:Cache domain|PF00015:Methyl-accepting chemotaxis protein (MCP) signalling domain	Cache_1	891	1438	1154	1419	1661	2415	2634	1739	112.987	136.992	97.3199	113.012	183.062	250.725	232.662	185.791
gene:GYO_3560	9701.72	1857.01	7198.12	7828.84	23541	31932.3	37134.3	20054.9	-2.08332	1.7937e-05	0.00012663	-	Chromosome	3296828	3298096	-	1269	protein_coding	- && PF01547:Bacterial extracellular solute-binding protein	SBP_bac_1	7183	1889	8369	9642	20395	30569	42810	18935	1425.52	281.635	1104.55	1201.79	3517.79	4966.82	5917.96	3165.99
gene:GYO_2271	317.403	93.3913	179.76	197.304	522.876	602.733	699.141	540.163	-1.58919	1.84019e-05	0.000129697	-	Chromosome	2159147	2159767	-	621	protein_coding	- && PF03067:Chitin binding domain	-	235	95	209	243	453	577	806	510	95.3028	28.9433	56.3676	61.8923	159.667	191.577	227.684	174.254
gene:GYO_3224	1684.26	447.295	2178.62	1738.39	4176.08	7490.81	9270.12	5118.84	-2.10693	1.88601e-05	0.000132706	-	Chromosome	2983754	2984080	-	327	protein_coding	- && PF11009:Protein of unknown function (DUF2847)	-	1247	455	2533	2141	3618	7171	10687	4833	960.391	263.257	1297.37	1035.6	2421.74	4521.59	5733.19	3135.99
gene:GYO_0497	514.598	278.208	455.85	444.949	937.252	1101.01	1026.16	697.975	-1.15239	1.90535e-05	0.000133846	yceG	Chromosome	428922	430535	+	1614	protein_coding	- && PF14266:Putative component of 'biosynthetic module'	-	381	283	530	548	812	1054	1183	659	59.4499	33.1741	54.9981	53.703	110.118	134.647	128.579	86.6338
gene:GYO_0131	19403.4	39293.2	17093.5	25539.9	11578.3	8688.97	9138.27	10800.1	1.33361	1.90867e-05	0.000133858	-	Chromosome	120141	120641	+	501	protein_coding	- && PF00466:Ribosomal protein L10	-	14366	39970	19874	31455	10031	8318	10535	10197	7221.5	15094.3	6643.89	9930.56	4382.42	3423.26	3688.8	4318.57
gene:GYO_0185	22.961	4.91533	17.2019	8.11951	48.4786	42.8285	54.6475	66.726	-2.03085	1.9169e-05	0.000134215	-	Chromosome	160669	160923	+	255	protein_coding	- && -	-	17	5	20	10	42	41	63	63	16.7895	3.70976	13.1361	6.20271	36.0509	33.1515	43.34	52.421
gene:GYO_4408	48.6234	651.773	145.356	129.1	23.085	38.6501	30.3597	27.5377	3.02639	1.94706e-05	0.000136102	-	Chromosome	4101116	4101847	+	732	protein_coding	- && PF00392:Bacterial regulatory proteins, gntR family|PF07729:FCD domain	FCD	36	663	169	159	20	37	35	26	12.3857	171.364	38.6679	34.3564	5.98034	10.422	8.38774	7.53646
gene:GYO_0511	143.169	354.887	167.718	194.056	43.8615	72.0773	80.6701	81.554	1.62672	1.99297e-05	0.000139083	-	Chromosome	445260	446798	-	1539	protein_coding	- && PF07690:Major Facilitator Superfamily	MFS_1	106	361	195	239	38	69	93	77	17.3459	44.3798	21.2213	24.563	5.40446	9.2442	10.6007	10.6159
gene:GYO_3554	6.75325	11.7968	9.46103	6.49561	24.2393	25.0704	31.2271	38.1292	-1.77785	2.00359e-05	0.000139596	-	Chromosome	3291182	3292048	+	867	protein_coding	- && PF04231:Endonuclease I	-	5	12	11	8	21	24	36	36	1.45238	2.61866	2.12495	1.45946	5.30161	5.70757	7.28403	8.81026
gene:GYO_0380	45.9221	34.4073	42.1446	40.5976	18.468	17.7582	12.1439	13.7689	1.39898	2.01418e-05	0.000140104	-	Chromosome	322897	323271	+	375	protein_coding	- && PF10057:Uncharacterized conserved protein (DUF2294)	-	34	35	49	50	16	17	14	13	22.8337	17.6585	21.8847	21.0892	9.3389	9.34709	6.54915	7.35559
gene:GYO_0641	128.312	169.087	191.801	137.22	45.0158	42.8285	74.5982	83.6723	1.34601	2.03607e-05	0.000141396	-	Chromosome	590347	591156	+	810	protein_coding	- && PF10997:Protein of unknown function (DUF2837)	-	95	172	223	169	39	41	86	79	29.5371	40.1754	46.11	33.0007	10.5387	10.4366	18.6252	20.6941
Novel00202	8.1039	0.983067	1.72019	1.6239	137.356	13.5798	26.89	19.0646	-4.06497	2.04903e-05	0.000142064	-	Chromosome	1421321	1422083	-	763	-	PF13424:Tetratricopeptide repeat	-	6	1	2	2	119	13	31	18	1.98041	0.247966	0.439016	0.414598	34.1373	3.513	7.12731	5.00557
gene:GYO_4261	4.05195	4.91533	7.74084	10.5554	24.2393	34.4717	29.4923	21.1829	-1.95857	2.0788e-05	0.000143893	-	Chromosome	3950718	3952643	-	1926	protein_coding	- && PF08279:HTH domain|PF00874:PRD domain|PF05043:Mga helix-turn-helix domain|PF00359:Phosphoenolpyruvate-dependent sugar phosphotransferase system, EIIA 2	PTS_EIIA_2	3	5	9	13	21	33	34	20	0.392278	0.491168	0.782638	1.0676	2.38655	3.53278	3.09678	2.20333
gene:GYO_3559	1870.65	500.381	1283.26	1472.88	3731.69	5756.78	6054.59	3042.92	-1.85823	2.11304e-05	0.000146026	-	Chromosome	3295892	3296770	-	879	protein_coding	- && PF00528:Binding-protein-dependent transport system inner membrane component	BPD_transp_1	1385	509	1492	1814	3233	5511	6980	2873	396.817	109.558	284.286	326.415	805.052	1292.71	1393.01	693.509
gene:GYO_3293	361.974	287.056	152.237	141.28	77.3348	52.2299	92.814	70.9626	1.67938	2.12498e-05	0.000146613	-	Chromosome	3054093	3054788	-	696	protein_coding	- && PF07673:Protein of unknown function (DUF1602)|PF00005:ABC transporter	ABC_tran	268	292	177	174	67	50	107	67	96.9739	79.3762	42.5931	39.5423	21.0704	14.8122	26.9689	20.4254
gene:GYO_3689	99.9481	8.8476	22.3624	24.3585	223.925	223.544	275.84	266.904	-2.68704	2.19101e-05	0.000150924	-	Chromosome	3411242	3411853	-	612	protein_coding	- && PF12730:ABC-2 family transporter protein	-	74	9	26	30	194	214	318	252	30.4516	2.78232	7.11536	7.75339	69.3837	72.0977	91.1515	87.3684
gene:GYO_0625	468.676	183.833	345.758	434.394	153.515	142.065	86.742	112.269	1.53551	2.22059e-05	0.000152715	-	Chromosome	574640	575431	+	792	protein_coding	- && PF07286:Protein of unknown function (DUF1445)	-	347	187	402	535	133	136	100	106	110.34	44.6717	85.0111	106.844	36.7565	35.4057	22.1495	28.3979
gene:GYO_3997	8.1039	1.96613	4.30047	8.11951	27.702	15.669	35.5642	30.7152	-2.3042	2.2497e-05	0.000154467	-	Chromosome	3712815	3713453	-	639	protein_coding	- && PF04203:Sortase family	-	6	2	5	10	24	15	41	29	2.36472	0.592169	1.31052	2.47526	8.22087	4.84004	11.2557	9.62947
gene:GYO_4139	1501.92	171.054	415.425	475.804	114.271	120.129	115.367	108.033	2.4847	2.26155e-05	0.000155031	-	Chromosome	3843317	3843505	+	189	protein_coding	- && PF01361:Tautomerase enzyme	-	1112	174	483	586	99	115	133	102	1481.74	174.182	428.016	490.408	114.652	125.457	123.446	114.51
gene:GYO_2128	1246.65	429.6	693.236	608.964	307.031	241.302	253.287	249.958	1.50111	2.27324e-05	0.000155582	-	Chromosome	2003531	2004370	+	840	protein_coding	- && PF00303:Thymidylate synthase	-	923	437	806	750	266	231	292	236	276.727	98.428	160.705	141.222	69.3122	56.7011	60.9806	59.6126
gene:GYO_1868	497.039	607.535	747.421	582.169	337.041	307.112	330.487	391.883	0.834506	2.2865e-05	0.000156238	murG	Chromosome	1695118	1696209	+	1092	protein_coding	- && PF03033:Glycosyltransferase family 28 N-terminal domain|PF04101:Glycosyltransferase family 28 C-terminal domain	-	368	618	869	717	292	294	381	370	84.8701	107.074	133.282	103.853	58.5285	55.5116	61.2055	71.8926
gene:GYO_4201	2868.78	2068.37	2736.82	2056.67	861.071	1350.67	1342.77	1291.1	1.00538	2.40497e-05	0.00016407	-	Chromosome	3899396	3900145	-	750	protein_coding	- && PF00881:Nitroreductase family	Nitroreductase	2124	2104	3182	2533	746	1293	1548	1219	713.219	530.763	710.581	534.19	217.713	355.464	362.074	344.864
gene:GYO_3011	2260.99	2976.73	2544.16	2355.47	1726.76	1332.91	1405.22	1621.55	0.736382	2.41812e-05	0.000164703	tgt	Chromosome	2778488	2779633	-	1146	protein_coding	- && PF01702:Queuine tRNA-ribosyltransferase	TGT	1674	3028	2958	2901	1496	1276	1620	1531	367.875	499.905	432.303	400.391	285.729	229.575	247.981	283.463
gene:GYO_4256	1578.91	1269.14	1248.86	1505.36	607.136	961.03	755.523	650.314	0.913067	2.44073e-05	0.000165978	-	Chromosome	3946103	3947194	+	1092	protein_coding	- && PF01063:Amino-transferase class IV	-	1169	1291	1452	1854	526	920	871	614	269.601	223.676	222.699	268.54	105.431	173.71	139.921	119.303
gene:GYO_1243	235.013	235.936	199.542	241.15	326.653	405.304	450.191	365.404	-0.76567	2.46297e-05	0.000167223	-	Chromosome	1142256	1142855	+	600	protein_coding	- && PF01553:Acyltransferase	Acyltransferase	174	240	232	297	283	388	519	345	73.0344	75.6792	64.7607	78.2937	103.239	133.334	151.741	122.004
gene:GYO_1628	54.026	98.3067	45.585	56.8366	21.9308	11.4906	19.9507	25.4194	1.69441	2.48829e-05	0.000168673	-	Chromosome	1483483	1483821	+	339	protein_coding	- && PF00893:Small Multidrug Resistance protein	-	40	100	53	70	19	11	23	24	29.716	55.8106	26.1849	32.6603	12.2676	6.6904	11.9019	15.0216
gene:GYO_2215	3260.47	836.59	2965.6	2319.75	6962.44	7151.32	8900.6	8080.2	-1.72875	2.49712e-05	0.000169002	gltB	Chromosome	2108810	2110291	-	1482	protein_coding	- && PF07992:Pyridine nucleotide-disulphide oxidoreductase|PF14691:Dihydroprymidine dehydrogenase domain II, 4Fe-4S cluster	Pyr_redox_2	2414	851	3448	2857	6032	6846	10261	7629	410.222	108.642	389.667	304.918	890.882	952.462	1214.59	1092.26
gene:GYO_1147	58.0779	146.477	35.2638	60.8964	16.1595	22.9812	6.93936	11.6506	2.3885	2.57169e-05	0.000173773	-	Chromosome	1063299	1063370	+	72	protein_coding	- && -	-	43	149	41	75	14	22	8	11	150.406	391.535	95.3732	164.76	42.5601	63.0012	19.4915	32.4165
gene:GYO_3014	684.779	1012.56	587.444	631.698	407.451	378.145	318.343	328.334	1.02629	2.60416e-05	0.000175627	ruvB	Chromosome	2780911	2781915	-	1005	protein_coding	- && PF05491:Holliday junction DNA helicase ruvB C-terminus|PF05496:Holliday junction DNA helicase ruvB N-terminus	-	507	1030	683	778	353	362	367	310	127.049	193.904	113.823	122.443	76.8804	74.268	64.0602	65.4487
gene:GYO_0885	540.26	242.818	526.377	453.881	677.545	2389	2116.51	1328.17	-1.88498	2.60738e-05	0.000175627	-	Chromosome	800468	801283	-	816	protein_coding	- && PF12697:Alpha/beta hydrolase family	-	400	247	612	559	587	2287	2440	1254	123.452	57.2695	125.613	108.354	157.455	577.876	524.551	326.071
gene:GYO_2049	256.623	619.332	159.117	221.663	116.579	67.8989	65.0565	46.6023	2.0867	2.8679e-05	0.00019287	-	Chromosome	1869527	1870702	+	1176	protein_coding	- && PF00144:Beta-lactamase	Beta-lactamase	190	630	185	273	101	65	75	44	40.6889	101.356	26.3475	36.7178	18.7984	11.3963	11.1877	7.93872
gene:GYO_1728	62.1299	41.2888	46.4451	33.29	100.42	167.136	98.0185	98.5003	-1.35353	2.91875e-05	0.00019598	-	Chromosome	1569513	1570193	-	681	protein_coding	- && PF00583:Acetyltransferase (GNAT) family	Acetyltransf_1	46	42	54	41	87	160	113	93	17.0114	11.6686	13.2807	9.52266	27.9627	48.4431	29.1085	28.9762
gene:GYO_3555	394.39	136.646	398.223	323.157	904.933	879.552	1055.65	731.868	-1.51263	2.93985e-05	0.000197086	-	Chromosome	3292081	3293184	-	1104	protein_coding	- && PF08402:TOBE domain|PF00005:ABC transporter|PF07673:Protein of unknown function (DUF1602)	ABC_tran	292	139	463	398	784	842	1217	691	66.6106	23.8211	70.2404	57.0211	155.437	157.254	193.379	132.805
Novel00518	14.8571	6.88147	15.4817	12.9912	226.233	40.7393	40.7688	47.6614	-2.82248	2.95561e-05	0.000197831	-	Chromosome	3255099	3256252	+	1154	-	PF00288:GHMP kinases N terminal domain|PF08544:GHMP kinases C terminal	GHMP_kinases	11	7	18	16	196	39	47	45	2.40058	1.14765	2.61241	2.19299	37.1756	6.96815	7.14464	8.27393
gene:GYO_3225	1934.13	519.059	2873.57	2265.34	5070.63	9472.42	12352.1	6975.52	-2.15742	2.97464e-05	0.000198792	-	Chromosome	2984104	2984559	-	456	protein_coding	- && PF12732:YtxH-like protein	-	1432	528	3341	2790	4393	9068	14240	6586	790.874	219.071	1227.12	967.745	2108.65	4100.21	5478.14	3064.52
gene:GYO_4122	149.922	21.6275	152.237	114.485	791.816	435.597	412.025	495.679	-2.28508	2.98232e-05	0.000198993	-	Chromosome	3828331	3829614	+	1284	protein_coding	- && PF00675:Insulinase (Peptidase family M16)	-	111	22	177	141	686	417	475	468	21.7714	3.24171	23.0878	17.369	116.941	66.9622	64.8958	77.3368
gene:GYO_2350	199.896	437.465	141.915	136.408	55.4041	73.1219	67.6588	65.6669	1.80479	2.99442e-05	0.000199488	-	Chromosome	2223677	2223955	-	279	protein_coding	- && -	-	148	445	165	168	48	70	78	62	133.594	301.767	99.0501	95.2416	37.6569	51.7312	49.0432	47.1512
gene:GYO_1726	33.7662	31.4581	60.2066	45.4693	11.5425	9.40138	18.2158	13.7689	1.68754	3.04765e-05	0.000202717	splA	Chromosome	1568153	1568392	+	240	protein_coding	- && PF11132:Transcriptional regulator protein (SplA)	-	25	32	70	56	10	9	21	13	26.2336	25.2264	48.8497	36.9061	9.12002	7.73197	15.3496	11.4931
gene:GYO_2204	1233.14	574.111	1096.62	1054.72	2142.29	2260.51	1949.96	2385.19	-1.14259	3.0566e-05	0.000202994	-	Chromosome	2098499	2099974	-	1476	protein_coding	- && PF02113:D-Ala-D-Ala carboxypeptidase 3 (S13) family	-	913	584	1275	1299	1856	2164	2248	2252	155.781	74.8588	144.677	139.202	275.232	302.294	267.176	323.733
gene:GYO_4247	892.78	1035.17	781.825	820.071	473.243	560.949	595.05	530.631	0.707441	3.07201e-05	0.0002037	menA	Chromosome	3939455	3940390	-	936	protein_coding	- && PF01040:UbiA prenyltransferase family	UbiA	661	1053	909	1010	410	537	686	501	177.85	212.848	162.653	170.674	95.8772	118.293	128.569	113.571
gene:GYO_4219	249.87	147.46	173.739	184.313	78.4891	92.9692	69.3936	108.033	1.11237	3.23297e-05	0.00021404	-	Chromosome	3914813	3915415	-	603	protein_coding	- && PF01323:DSBA-like thioredoxin domain	DSBA	185	150	202	227	68	89	80	102	77.2652	47.0642	56.106	59.5429	24.683	30.4321	23.2735	35.8912
gene:GYO_0473	752.312	2495.02	616.687	785.157	400.525	233.99	248.95	205.474	2.09441	3.2956e-05	0.000217847	-	Chromosome	407527	408603	+	1077	protein_coding	- && PF05225:helix-turn-helix, Psq domain|PF02810:SEC-C motif	HTH_psq	557	2538	717	967	347	224	287	194	130.247	445.854	111.501	142.014	70.5214	42.8836	46.7471	38.2201
gene:GYO_2924	21.6104	19.6613	34.4037	43.0334	58.8668	112.817	80.6701	99.5595	-1.5525	3.30709e-05	0.000218268	-	Chromosome	2698661	2699017	-	357	protein_coding	- && -	-	16	20	40	53	51	108	93	94	11.2871	10.5993	18.7658	23.4817	31.2687	62.3756	45.6986	55.8682
Novel00018	52.6753	32.4412	51.6056	65.7681	850.683	123.263	183.893	146.162	-2.68565	3.42852e-05	0.000225932	-	Chromosome	58506	60063	-	1558	-	PF14572:Phosphoribosyl synthetase-associated domain|PF01386:Ribosomal L25p family|PF14693:Ribosomal protein TL5, C-terminal domain|PF01195:Peptidyl-tRNA hydrolase	-	39	33	60	81	737	118	212	138	6.30415	4.0074	6.44999	8.22317	103.54	15.6161	23.8702	18.7939
gene:GYO_3245	730.702	1276.02	687.215	667.424	355.509	401.126	417.229	333.63	1.15649	3.49981e-05	0.000230274	-	Chromosome	3003654	3004589	+	936	protein_coding	- && PF00291:Pyridoxal-phosphate dependent enzyme	PALP	541	1298	799	822	308	384	481	315	145.563	262.371	142.97	138.905	72.0248	84.5891	90.1483	71.4069
gene:GYO_2561	293.091	291.971	423.166	291.491	826.444	499.318	650.565	653.491	-1.01544	3.53805e-05	0.00023243	ribD	Chromosome	2396850	2397935	-	1086	protein_coding	- && PF00383:Cytidine and deoxycytidylate deaminase zinc-binding region|PF01872:RibD C-terminal domain	RibD_C	217	297	492	359	716	478	750	617	50.3222	51.742	75.877	52.2861	144.308	90.7522	121.149	120.548
gene:GYO_1033	230.961	117.968	123.853	124.229	43.8615	55.3637	47.7081	76.2583	1.41431	3.57257e-05	0.000234336	-	Chromosome	953988	954119	-	132	protein_coding	- && PF11121:Protein of unknown function (DUF2639)	-	171	120	144	153	38	53	55	72	326.251	171.998	182.711	183.332	63.0111	82.7868	73.0932	115.735
gene:GYO_3152	4925.82	154.341	269.209	175.381	18126.4	36773	12943.6	31291.3	-4.16572	3.63818e-05	0.00023804	-	Chromosome	2915170	2916192	-	1023	protein_coding	- && PF02800:Glyceraldehyde 3-phosphate dehydrogenase, C-terminal domain|PF00044:Glyceraldehyde 3-phosphate dehydrogenase, NAD binding domain	-	3647	157	313	216	15704	35203	14922	29544	897.82	29.0363	51.2441	33.3964	3360.02	7095.17	2558.82	6127.72
sRNA00015	2.7013	2.9492	12.0413	9.74342	219.308	22.9812	31.2271	41.3066	-3.49244	3.64022e-05	0.00023804	-	Chromosome	972339	972406	-	68	-	-	-	2	3	14	12	190	22	36	39	7.40714	8.34697	34.4821	27.9122	611.578	66.7072	92.8714	121.692
gene:GYO_1061	659.117	784.487	690.655	737.252	499.791	322.781	403.351	433.19	0.7925	3.66012e-05	0.000238974	-	Chromosome	979510	980346	-	837	protein_coding	- && PF00924:Mechanosensitive ion channel	-	488	798	803	908	433	309	465	409	146.833	180.382	160.681	171.586	113.232	76.1188	97.4576	103.682
gene:GYO_4508	305.247	92.4083	181.48	134.784	48.4786	71.0327	45.1059	52.9572	1.71116	3.72911e-05	0.000243106	-	Chromosome	4194640	4194846	-	207	protein_coding	- && PF06107:Bacterial protein of unknown function (DUF951)	-	226	94	211	166	42	68	52	50	274.959	85.916	170.721	126.841	44.4106	67.7326	44.0678	51.2513
gene:GYO_1711	35.1169	38.3396	7.74084	30.8542	6.92551	4.17839	2.60226	2.11829	2.83993	3.73741e-05	0.000243275	-	Chromosome	1554705	1554899	+	195	protein_coding	- && -	-	26	39	9	38	6	4	3	2	33.579	37.8396	7.73006	30.8227	6.73479	4.22945	2.69883	2.17621
gene:GYO_3526	2649.98	3133.03	2478.79	2480.51	1622.88	1919.97	1591.72	1766.65	0.638347	3.74508e-05	0.000243402	lipA	Chromosome	3262523	3263419	-	897	protein_coding	- && PF16881:N-terminal domain of lipoyl synthase of Radical_SAM family|PF04055:Radical SAM superfamily	Radical_SAM	1962	3187	2882	3055	1406	1838	1835	1668	550.853	672.212	538.117	538.692	343.084	422.486	358.866	394.556
gene:GYO_2644	1254.75	825.776	755.162	751.867	494.02	469.025	381.665	453.313	0.995727	3.78271e-05	0.000245472	-	Chromosome	2462026	2462463	-	438	protein_coding	- && PF06491:Disulphide isomerase	-	929	840	878	926	428	449	440	428	534.16	362.845	335.734	334.394	213.883	211.364	176.225	207.336
gene:GYO_3137	12844.7	18924	11410.9	12685.1	8548.38	6676.03	7309.75	6153.62	0.96151	3.89413e-05	0.000252318	infC	Chromosome	2900779	2901246	-	468	protein_coding	- && PF00707:Translation initiation factor IF-3, C-terminal domain|PF05198:Translation initiation factor IF-3, N-terminal domain	-	9510	19250	13267	15623	7406	6391	8427	5810	5117.57	7782.18	4747.9	5280.08	3463.74	2815.67	3158.75	2634.12
gene:GYO_4082	256.623	796.284	301.893	457.941	129.276	138.932	155.268	167.345	1.61769	3.96412e-05	0.000256463	tdk	Chromosome	3789287	3789874	-	588	protein_coding	- && PF00265:Thymidine kinase	TK	190	810	351	564	112	133	179	158	81.3777	260.63	99.9781	151.713	41.6915	46.6373	53.4028	57.0145
gene:GYO_3045	1393.87	2576.62	2034.12	1705.91	1088.46	917.157	994.931	896.035	0.984972	4.01531e-05	0.000259253	-	Chromosome	2806080	2807093	-	1014	protein_coding	- && PF06723:MreB/Mbl protein	-	1032	2621	2365	2101	943	878	1147	846	256.313	489.041	390.632	327.725	203.555	178.532	198.433	177.026
gene:GYO_1853	10793	15618	7123.3	8485.7	5835.89	2921.74	2734.11	3179.55	1.51814	4.01943e-05	0.000259253	-	Chromosome	1678826	1679344	+	519	protein_coding	- && PF02620:Uncharacterized ACR, COG1399	-	7991	15887	8282	10451	5056	2797	3152	3002	3877.6	5791.5	2672.65	3185.02	2132.29	1111.18	1065.39	1227.29
gene:GYO_4264	210.701	50.1364	646.79	372.686	1598.64	2291.85	2783.55	1308.04	-2.63952	4.04557e-05	0.000260544	katX	Chromosome	3953710	3955353	+	1644	protein_coding	- && PF06628:Catalase-related immune-responsive|PF00199:Catalase	Catalase	156	51	752	459	1385	2194	3209	1235	23.8975	5.86928	76.611	44.1604	184.398	275.165	342.418	159.393
gene:GYO_0859	1664	1274.05	1338.31	1188.7	792.971	932.826	822.315	745.637	0.729523	4.30067e-05	0.000276555	-	Chromosome	773476	775404	-	1929	protein_coding	- && PF16326:ABC transporter C-terminal domain|PF00005:ABC transporter|PF12848:ABC transporter	ABC_tran	1232	1296	1556	1464	687	893	948	704	160.845	127.113	135.099	120.041	77.9528	95.4505	86.2113	77.4365
gene:GYO_3079	68.8831	15.7291	291.572	179.441	648.689	1166.82	1585.64	829.309	-2.92679	4.37275e-05	0.000280766	-	Chromosome	2844876	2845700	+	825	protein_coding	- && PF09557:Domain of unknown function (DUF2382)|PF11181:Heat induced stress protein YflT	-	51	16	339	221	562	1117	1828	783	15.5685	3.66929	68.821	42.3702	149.104	279.163	388.696	201.378
gene:GYO_3958	669.922	597.705	572.822	595.16	222.77	400.081	340.029	326.216	0.916346	4.43946e-05	0.00028462	-	Chromosome	3678631	3679158	-	528	protein_coding	- && PF02525:Flavodoxin-like fold	Flavodoxin_2	496	608	666	733	193	383	392	308	236.58	217.864	211.259	219.579	80.0075	149.563	130.239	123.772
gene:GYO_3236	491.637	349.972	448.109	541.572	761.806	812.697	732.103	837.782	-0.779735	4.45394e-05	0.000285119	-	Chromosome	2994057	2995757	-	1701	protein_coding	- && PF03949:Malic enzyme, NAD binding domain|PF00390:Malic enzyme, N-terminal domain	Malic_M	364	356	521	667	660	778	844	791	53.8923	39.597	51.2989	62.0216	84.9272	94.3049	87.0415	98.6683
gene:GYO_3308	3858.81	472.855	211.583	221.663	10649.1	20360.3	6509.12	21320.6	-3.62668	4.5766e-05	0.000292531	pckA	Chromosome	3068363	3069946	+	1584	protein_coding	- && PF01293:Phosphoenolpyruvate carboxykinase	-	2857	481	246	273	9226	19491	7504	20130	454.239	57.4522	26.0109	27.2602	1274.87	2537.1	831.047	2696.46
gene:GYO_3141	528.104	108.137	106.652	296.362	60.0211	58.4975	52.9126	54.0163	2.20291	4.67233e-05	0.000298203	-	Chromosome	2903348	2903788	-	441	protein_coding	- && PF03788:LrgA family	-	391	110	124	365	52	56	61	51	223.289	47.1922	47.0932	130.911	25.809	26.1823	24.265	24.5379
gene:GYO_0986	9.45455	26.5428	74.8282	45.4693	124.659	237.124	255.889	149.339	-2.28357	4.7554e-05	0.000302806	-	Chromosome	907391	910576	+	3186	protein_coding	- && PF00258:Flavodoxin|PF00175:Oxidoreductase NAD-binding domain|PF00667:FAD binding domain|PF00067:Cytochrome P450	p450	7	27	87	56	108	227	295	141	0.553327	1.60337	4.5735	2.78012	7.41968	14.6906	16.2429	9.39028
gene:GYO_1745	976.52	1209.17	636.469	455.505	408.605	247.57	212.518	238.307	1.5663	4.75869e-05	0.000302806	-	Chromosome	1587488	1587727	+	240	protein_coding	- && PF08796:Protein of unknown function (DUF1797)	-	723	1230	740	561	354	237	245	225	758.676	969.64	516.411	369.72	322.849	203.609	179.078	198.919
gene:GYO_2579	394.39	125.833	447.249	354.011	828.752	1033.11	1054.78	1031.61	-1.57924	4.81999e-05	0.000306249	sigF	Chromosome	2408962	2409729	-	768	protein_coding	- && PF04542:Sigma-70 region 2|PF04545:Sigma-70, region 4|PF04539:Sigma-70 region 3	Sigma70_r2	292	128	520	436	718	989	1216	974	95.7527	31.533	113.401	89.7939	204.631	265.518	277.754	269.093
gene:GYO_1821	35.1169	44.238	27.523	31.6661	9.23401	13.5798	12.1439	13.7689	1.49872	4.8319e-05	0.000306548	-	Chromosome	1651853	1652059	-	207	protein_coding	- && PF09963:Uncharacterized protein conserved in bacteria (DUF2197)	-	26	45	32	39	8	13	14	13	31.6324	41.13	25.8913	29.8	8.45915	12.9489	11.8644	13.3253
gene:GYO_0583	887.377	1195.41	780.965	958.103	481.323	591.243	516.983	588.884	0.81098	4.9079e-05	0.000310907	-	Chromosome	532786	534264	-	1479	protein_coding	- && PF00854:POT family	-	657	1216	908	1180	417	566	596	556	111.873	155.554	102.824	126.193	61.7128	78.9055	70.6914	79.7649
gene:GYO_0621	28.3636	3.93227	12.9014	13.8032	48.4786	48.0515	68.5262	79.4357	-2.08268	5.05239e-05	0.000319584	-	Chromosome	571380	571544	-	165	protein_coding	- && -	-	21	4	15	17	42	46	79	75	32.0527	4.58662	15.2259	16.2962	55.7151	57.4821	83.9907	96.4456
gene:GYO_2635	1.35065	0	3.44037	7.30756	10.3883	38.6501	42.5036	28.5969	-3.24838	5.06454e-05	0.000319877	-	Chromosome	2453861	2454589	+	729	protein_coding	- && PF09844:Uncharacterized conserved protein (COG2071)	-	1	0	4	9	9	37	49	27	0.345463	0	0.918983	1.95271	2.70223	10.4649	11.7912	7.85853
gene:GYO_3226	1277.71	399.125	1713.31	1588.99	2830.22	5001.54	6522.13	4455.82	-1.91744	5.07291e-05	0.000319931	-	Chromosome	2984589	2985011	-	423	protein_coding	- && PF06103:Bacterial protein of unknown function (DUF948)	-	946	406	1992	1957	2452	4788	7519	4207	563.223	181.594	788.722	731.766	1268.78	2333.85	3118.23	2110.27
gene:GYO_3107	363.325	419.77	291.572	266.32	163.904	206.83	126.643	156.753	1.03558	5.27126e-05	0.000331949	-	Chromosome	2871073	2871606	-	534	protein_coding	- && PF02674:Colicin V production protein	-	269	427	339	328	142	198	146	148	126.865	151.288	106.325	97.1526	58.2042	76.451	47.9623	58.8066
gene:GYO_4025	70.2338	45.2211	119.553	78.7593	160.441	193.251	233.336	216.065	-1.35249	5.34712e-05	0.000336229	-	Chromosome	3746975	3747748	-	774	protein_coding	- && PF07739:TipAS antibiotic-recognition domain|PF13411:MerR HTH family regulatory protein	TipAS	52	46	139	97	139	185	269	204	16.9197	11.2443	30.078	19.8222	39.308	49.2822	60.9677	55.9235
gene:GYO_3855	199.896	220.207	331.136	248.457	433.998	498.273	526.524	820.836	-1.18738	5.42509e-05	0.000340628	uvrB	Chromosome	3570565	3572550	-	1986	protein_coding	- && PF12344:Ultra-violet resistance protein B|PF02151:UvrB/uvrC motif|PF04851:Type III restriction enzyme, res subunit|PF00271:Helicase conserved C-terminal domain	Helicase_C	148	224	385	306	376	477	607	775	18.7677	21.3396	32.4681	24.3705	41.4396	49.522	53.6164	82.7995
gene:GYO_4002	351.169	936.863	225.345	221.663	135.047	102.371	41.6362	75.1992	2.29384	5.69352e-05	0.000356956	fabZ	Chromosome	3724653	3725078	-	426	protein_coding	- && PF07977:FabA-like domain	-	260	953	262	273	117	98	48	71	153.707	423.253	103.007	101.362	60.1151	47.4324	19.766	35.3634
gene:GYO_3938	160.727	77.6623	116.113	70.6398	214.691	274.729	275.84	252.076	-1.26727	5.74692e-05	0.000359774	-	Chromosome	3658009	3658959	-	951	protein_coding	- && PF01238:Phosphomannose isomerase type I	-	119	79	135	87	186	263	318	238	31.5134	15.7168	23.7754	14.4697	42.8094	57.0209	58.659	53.1009
gene:GYO_2606	218.805	152.375	160.838	142.091	70.4093	92.9692	52.0452	90.0272	1.141	5.82802e-05	0.000363906	-	Chromosome	2430848	2431171	-	324	protein_coding	- && PF01521:Iron-sulphur cluster biosynthesis	-	162	155	187	175	61	89	60	85	125.921	90.5114	96.6655	85.4309	41.209	56.6375	32.4859	55.6646
gene:GYO_2339	41564.9	37009.5	31175.8	36590.6	59656.3	68856.8	50176.8	59035.6	-0.699982	5.8385e-05	0.000363906	sucA	Chromosome	2209788	2212622	-	2835	protein_coding	- && PF02779:Transketolase, pyrimidine binding domain|PF00676:Dehydrogenase E1 component|PF16870:2-oxoglutarate dehydrogenase C-terminal|PF16078:2-oxoglutarate dehydrogenase N-terminus	-	30774	37647	36247	45065	51684	65917	57846	55739	2733.76	2512.43	2141.38	2514.25	3990.34	4794.06	3579.39	4171.68
gene:GYO_3772	326.857	157.291	164.278	186.749	518.259	553.637	430.241	420.48	-1.2076	5.83856e-05	0.000363906	slr	Chromosome	3489398	3489856	+	459	protein_coding	- && PF08671:Anti-repressor SinI|PF01381:Helix-turn-helix	HTH_3	242	160	191	230	449	530	496	397	132.78	65.9514	69.694	79.2569	214.112	238.08	189.565	183.52
gene:GYO_1755	205.299	169.087	256.308	262.26	133.893	81.4787	90.2117	117.565	1.08197	5.99165e-05	0.000372901	-	Chromosome	1594308	1594553	+	246	protein_coding	- && PF03698:Uncharacterised protein family (UPF0180)	-	152	172	298	323	116	78	104	111	155.61	132.285	202.888	207.677	103.212	65.376	74.1629	95.7399
gene:GYO_1178	153.974	157.291	156.537	150.211	61.1753	87.7463	103.223	80.4949	0.887291	6.04996e-05	0.000375981	-	Chromosome	1077328	1077951	-	624	protein_coding	- && -	-	114	160	182	185	53	84	119	76	46.0097	48.5123	48.8497	46.8931	18.5908	27.7558	33.4542	25.8425
gene:GYO_4246	544.312	435.499	990.828	689.347	133.893	224.589	179.556	350.576	1.58227	6.08671e-05	0.000377713	-	Chromosome	3938681	3939313	-	633	protein_coding	- && PF04607:Region found in RelA / SpoT proteins	-	403	443	1152	849	116	215	207	331	160.336	132.409	304.806	212.142	40.1108	70.0315	57.366	110.951
gene:GYO_4298	183.688	129.765	104.071	151.023	229.696	387.546	302.73	290.205	-1.09472	6.11122e-05	0.000378682	-	Chromosome	3985857	3986345	+	489	protein_coding	- && PF04525:LURP-one-related	-	136	132	121	186	199	371	349	274	70.0421	51.0719	41.443	60.1625	89.0741	156.431	125.2	118.89
gene:GYO_2824	322.805	392.244	375.001	304.482	212.382	182.805	226.397	226.657	0.717119	6.13305e-05	0.000379483	holA	Chromosome	2617111	2618154	-	1044	protein_coding	- && PF06144:DNA polymerase III, delta subunit	-	239	399	436	375	184	175	261	214	57.6536	72.3084	69.9457	56.8136	38.5767	34.5618	43.8559	43.4929
gene:GYO_1348	93.1948	29.492	83.4291	98.2461	188.143	344.717	339.161	171.581	-1.77882	6.21331e-05	0.000383891	-	Chromosome	1232336	1233805	-	1470	protein_coding	- && PF00474:Sodium:solute symporter family	-	69	30	97	121	163	330	391	162	11.8212	3.86118	11.0517	13.0194	24.2704	46.2866	46.6603	23.3831
gene:GYO_3414	314.701	96.3405	290.712	223.287	423.61	768.824	924.67	916.159	-1.71444	6.29707e-05	0.00038825	-	Chromosome	3155864	3156262	-	399	protein_coding	- && PF01894:Uncharacterised protein family UPF0047	-	233	98	338	275	367	736	1066	865	147.066	46.4697	141.879	109.014	201.326	380.333	468.676	459.99
gene:GYO_0837	232.312	138.612	590.024	465.248	990.348	1916.84	1560.49	1008.3	-1.93985	6.3021e-05	0.00038825	-	Chromosome	753484	754050	+	567	protein_coding	- && PF07563:Protein of unknown function (DUF1541)	-	172	141	686	573	858	1835	1799	952	76.3967	47.0492	202.636	159.843	331.216	667.286	556.591	356.254
gene:GYO_0472	18.9091	39.3227	23.2225	38.9737	2.3085	8.35679	9.54163	8.47315	2.0584	6.39599e-05	0.000393464	-	Chromosome	406909	407295	-	387	protein_coding	- && PF06271:RDD family	-	14	40	27	48	2	8	11	8	9.11059	19.5553	11.685	19.6179	1.13117	4.26224	4.9862	4.38616
Novel00082	59.4286	57.0179	101.491	133.16	1651.73	238.168	333.089	203.355	-2.78655	6.51831e-05	0.00040041	-	Chromosome	639196	641484	-	2289	-	PF04542:Sigma-70 region 2|PF04545:Sigma-70, region 4|PF04539:Sigma-70 region 3|PF13581:Histidine kinase-like ATPase domain|PF07228:Stage II sporulation protein E (SpoIIE)|PF09371:Tex-like protein N-terminal domain	Sigma70_r3	44	58	118	164	1431	228	384	192	4.84101	4.79401	8.63398	11.3323	136.836	20.5375	29.4289	17.7976
gene:GYO_3942	198.546	48.1703	525.517	570.802	1209.66	2400.49	2978.72	1783.6	-2.63934	6.58937e-05	0.000404192	-	Chromosome	3662948	3664321	-	1374	protein_coding	- && PF00083:Sugar (and other) transporter	Sugar_tr	147	49	611	703	1048	2298	3434	1684	26.9439	6.74724	74.4782	80.9264	166.948	344.844	438.431	260.052
gene:GYO_0968	10.8052	4.91533	12.9014	9.74342	35.7818	30.2933	23.4204	31.7743	-1.65299	6.75098e-05	0.00041351	-	Chromosome	887795	889789	+	1995	protein_coding	- && PF02449:Beta-galactosidase|PF08533:Beta-galactosidase C-terminal domain|PF08532:Beta-galactosidase trimerisation domain	-	8	5	15	12	31	29	27	30	1.0099	0.47418	1.25928	0.951393	3.40115	2.99719	2.37415	3.19068
gene:GYO_3892	1746.39	1096.12	857.513	901.266	551.732	586.02	474.479	409.888	1.18536	6.77381e-05	0.000414312	-	Chromosome	3602971	3603816	-	846	protein_coding	- && PF02645:Uncharacterised protein, DegV family COG1307	-	1293	1115	997	1110	478	561	547	387	384.909	249.357	197.378	207.527	123.67	136.726	113.424	97.0613
gene:GYO_4307	634.805	1143.31	399.083	552.127	1554.78	1721.5	2240.55	1775.12	-1.41811	6.82212e-05	0.000416668	-	Chromosome	3994408	3995601	+	1194	protein_coding	- && PF01773:Na+ dependent nucleoside transporter N-terminus|PF07662:Na+ dependent nucleoside transporter C-terminus	-	470	1163	464	680	1347	1648	2583	1676	99.1341	184.286	65.0862	90.0796	246.928	284.585	379.497	297.834
gene:GYO_4182	713.143	933.913	760.323	874.472	570.2	521.255	505.706	540.163	0.620135	6.97768e-05	0.000425558	-	Chromosome	3882378	3883700	-	1323	protein_coding	- && PF00860:Permease family	-	528	950	884	1077	494	499	583	510	100.509	135.856	111.91	128.759	81.7286	77.7678	77.3031	81.7929
gene:GYO_3574	2262.34	1576.84	2199.26	2525.17	1340.09	1283.81	1097.29	1169.29	0.808507	7.15496e-05	0.000435746	-	Chromosome	3309115	3309939	-	825	protein_coding	- && PF03180:NLPA lipoprotein	-	1675	1604	2557	3110	1161	1229	1265	1104	511.317	367.847	519.101	596.25	308.025	307.155	268.983	283.936
gene:GYO_2546	1450.6	1191.48	1439.8	1364.89	2146.91	2099.64	1860.62	1881.04	-0.552511	7.17783e-05	0.000436514	-	Chromosome	2385774	2387402	-	1629	protein_coding	- && PF05140:ResB-like family	-	1074	1212	1674	1681	1860	2010	2145	1776	166.04	140.766	172.111	163.218	249.919	254.41	230.991	231.327
gene:GYO_0656	182.338	59.9671	504.875	419.779	795.279	1796.71	2533.74	1390.66	-2.48042	7.33568e-05	0.000445478	-	Chromosome	608350	608607	-	258	protein_coding	- && PF04226:Transglycosylase associated protein	-	135	61	587	517	689	1720	2921	1313	131.778	44.7329	381.06	316.951	584.53	1374.57	1986.1	1079.82
gene:GYO_0130	20563.6	37028.2	14694.7	21969.8	11511.3	9303.19	9563.31	9586.31	1.23789	7.3861e-05	0.0004479	rplA	Chromosome	119191	119889	+	699	protein_coding	- && PF00687:Ribosomal protein L1p/L10e family	-	15225	37666	17085	27058	9973	8906	11025	9051	5485.42	10195	4093.67	6122.66	3122.88	2627.03	2766.88	2747.42
gene:GYO_4064	655.065	1211.14	559.921	734.816	395.908	354.119	333.957	346.34	1.14438	7.47813e-05	0.000452836	upp	Chromosome	3775308	3775937	-	630	protein_coding	- && PF14681:Uracil phosphoribosyltransferase	-	485	1232	651	905	343	339	385	327	193.879	369.987	173.067	227.211	119.168	110.948	107.203	110.132
gene:GYO_3005	8222.76	5838.43	6227.08	6740.82	4477.34	4390.45	3683.07	3393.49	0.761396	7.49946e-05	0.000453483	secDF	Chromosome	2772657	2774870	-	2214	protein_coding	- && PF02355:Protein export membrane protein|PF07549:SecD/SecF GG Motif	-	6088	5939	7240	8302	3879	4203	4246	3204	692.511	507.519	547.691	593.099	383.486	391.418	336.427	307.058
gene:GYO_4375	155.325	204.478	106.652	169.698	390.137	394.858	283.646	284.91	-1.0893	7.5157e-05	0.00045382	-	Chromosome	4066638	4067474	-	837	protein_coding	- && PF01261:Xylose isomerase-like TIM barrel	-	115	208	124	209	338	378	327	269	34.602	47.0169	24.8125	39.495	88.389	93.1162	68.5347	68.1918
gene:GYO_1730	1472.21	834.624	1084.58	1131.86	1782.16	2415.11	2216.26	2108.75	-0.91467	7.76857e-05	0.000468425	-	Chromosome	1572446	1573312	+	867	protein_coding	- && PF03446:NAD binding domain of 6-phosphogluconate dehydrogenase|PF14833:NAD-binding of NADP-dependent 3-hydroxyisobutyrate dehydrogenase	NAD_binding_2	1090	849	1261	1394	1544	2312	2555	1991	316.619	185.27	243.596	254.311	389.794	549.829	516.964	487.256
gene:GYO_0358	83.7403	40.3057	161.698	90.9386	242.393	334.271	308.802	271.141	-1.61586	7.82767e-05	0.000471321	-	Chromosome	301200	303128	-	1929	protein_coding	- && PF00933:Glycosyl hydrolase family 3 N terminal domain|PF01915:Glycosyl hydrolase family 3 C-terminal domain	Glyco_hydro_3	62	41	188	112	210	320	356	256	8.09448	4.02132	16.323	9.18349	23.8284	34.204	32.3747	28.1587
gene:GYO_1258	813.091	358.819	606.366	593.536	916.475	1556.45	1682.8	1752.88	-1.31772	7.8957e-05	0.000474746	dat	Chromosome	1155089	1155937	+	849	protein_coding	- && PF01063:Amino-transferase class IV	-	602	365	705	731	794	1490	1940	1655	178.574	81.3395	139.077	136.186	204.701	361.857	400.85	413.614
gene:GYO_0649	499.74	699.944	350.058	530.204	303.568	223.544	233.336	237.248	1.06035	7.9222e-05	0.000475667	-	Chromosome	599466	601577	+	2112	protein_coding	- && PF03170:Bacterial cellulose synthase subunit	-	370	712	407	653	263	214	269	224	44.1202	63.7827	32.2757	48.9036	27.2564	20.8919	22.3433	22.504
gene:GYO_1695	730.702	883.777	471.331	377.557	312.802	207.875	170.882	245.721	1.39436	7.98603e-05	0.000478824	-	Chromosome	1541938	1542375	+	438	protein_coding	- && PF01047:MarR family	MarR	541	899	548	465	271	199	197	232	311.066	388.331	209.547	167.919	135.426	93.6781	78.9006	112.388
gene:GYO_2279	66.1818	45.2211	30.1033	39.7856	131.585	124.307	88.4769	90.0272	-1.27562	8.02036e-05	0.000480206	-	Chromosome	2164780	2165511	+	732	protein_coding	- && PF00722:Glycosyl hydrolases family 16	-	49	46	35	49	114	119	102	85	16.8583	11.8895	8.00815	10.5878	34.088	33.5193	24.4443	24.6384
gene:GYO_1799	32576.3	41771.5	28277.3	41087.2	24125	19634.3	16606.8	18768	0.86084	8.07576e-05	0.000482844	-	Chromosome	1633914	1635242	+	1329	protein_coding	- && PF00198:2-oxoacid dehydrogenases acyltransferase (catalytic domain)|PF00364:Biotin-requiring enzyme|PF02817:e3 binding domain	Biotin_lipoyl	24119	42491	32877	50603	20901	18796	19145	17720	4570.5	6049.07	4143.26	6022.45	3442.3	2916.08	2527.08	2829.07
gene:GYO_4376	286.338	249.699	178.039	242.773	700.63	509.764	394.676	421.539	-1.08397	8.16576e-05	0.00048754	-	Chromosome	4067561	4068430	-	870	protein_coding	- && PF01261:Xylose isomerase-like TIM barrel	-	212	254	207	299	607	488	455	398	61.3686	55.2371	39.8498	54.3593	152.713	115.654	91.7446	97.0664
gene:GYO_2823	170855	37526.6	35836.7	76412.7	22419	17511.6	17061.3	21995.2	2.02121	8.19202e-05	0.000488423	rpsT	Chromosome	2616830	2617096	+	267	protein_coding	- && PF01649:Ribosomal protein S20	-	126498	38173	41666	94110	19423	16764	19669	20767	119317	27049.6	26136.4	55750.2	15922.5	12945.7	12922.9	16503.2
gene:GYO_0626	256.623	181.867	229.645	272.816	132.739	96.103	64.1891	42.3657	1.49113	8.31771e-05	0.000495223	-	Chromosome	575477	576199	+	723	protein_coding	- && PF02682:Allophanate hydrolase subunit 1	-	190	185	267	336	115	92	74	40	66.1827	48.4117	61.8512	73.506	34.815	26.2367	17.9548	11.7389
gene:GYO_0670	340.364	475.804	408.545	386.489	262.015	197.429	258.491	229.834	0.766577	8.39899e-05	0.000499365	-	Chromosome	620836	621603	+	768	protein_coding	- && PF12730:ABC-2 family transporter protein	-	252	484	475	476	227	189	298	217	82.6359	119.234	103.588	98.0319	64.6952	50.7411	68.068	59.952
gene:GYO_3659	189.091	447.295	233.945	280.123	77.3348	131.619	98.8859	133.452	1.38316	8.45274e-05	0.000501695	-	Chromosome	3384575	3385183	-	609	protein_coding	- && PF03458:UPF0126 domain	-	140	455	272	345	67	126	114	126	57.8949	141.355	74.8043	89.6032	24.0805	42.6592	32.8379	43.8994
gene:GYO_0431	5266.18	3158.59	3756.03	3367.97	1941.45	2432.87	1908.33	2062.15	0.897586	8.46176e-05	0.000501695	-	Chromosome	365412	366380	+	969	protein_coding	- && PF12368:Rhodanase C-terminal|PF00581:Rhodanese-like domain	Rhodanese	3899	3213	4367	4148	1682	2329	2200	1947	1013.35	627.341	754.804	677.075	379.935	495.57	398.279	426.332
gene:GYO_3042	1555.95	1909.12	1871.56	1639.33	1123.09	900.444	1002.74	1266.74	0.700875	8.51649e-05	0.000504238	minC	Chromosome	2803929	2804609	-	681	protein_coding	- && PF03775:Septum formation inhibitor MinC, C-terminal domain	-	1152	1942	2176	2019	973	862	1156	1196	426.025	539.534	535.164	468.933	312.732	260.987	297.782	372.64
gene:GYO_4357	143.169	19.6613	256.308	58.4605	20.7765	18.8028	17.3484	16.9463	2.69348	8.57465e-05	0.000506976	-	Chromosome	4051242	4051916	-	675	protein_coding	- && PF00528:Binding-protein-dependent transport system inner membrane component	BPD_transp_1	106	20	298	72	18	18	20	16	39.5486	5.60587	73.9414	16.8714	5.83682	5.49829	5.19774	5.02946
gene:GYO_0486	202.597	40.3057	505.735	357.259	967.263	2156.05	2624.81	1057.02	-2.62073	8.63826e-05	0.000510029	-	Chromosome	420483	422174	+	1692	protein_coding	- && PF00128:Alpha amylase, catalytic domain	-	150	41	588	440	838	2064	3026	998	22.3265	4.58458	58.2039	41.1315	108.405	251.518	313.731	125.151
gene:GYO_2707	1299.33	1080.39	1194.67	1034.43	615.216	777.181	790.22	759.406	0.646297	8.84257e-05	0.000521369	yqhS	Chromosome	2520419	2520859	-	441	protein_coding	- && PF01220:Dehydroquinase class II	-	962	1099	1389	1274	533	744	911	717	549.371	471.493	527.52	456.933	264.543	347.851	362.383	344.974
gene:GYO_3517	1256.1	534.788	1084.58	1122.93	2161.91	2140.38	2083.54	2813.08	-1.20227	8.88552e-05	0.000523176	thrB	Chromosome	3255066	3255995	-	930	protein_coding	- && PF08544:GHMP kinases C terminal|PF00288:GHMP kinases N terminal domain	GHMP_kinases	930	544	1261	1383	1873	2049	2402	2656	251.843	110.671	227.095	235.213	440.821	454.274	453.083	605.969
gene:GYO_0659	148.571	23.5936	387.902	270.38	1224.66	1175.17	1871.89	851.551	-2.62411	8.95165e-05	0.000526342	-	Chromosome	610202	610573	+	372	protein_coding	- && PF10685:Stress-induced bacterial acidophilic repeat motif|PF00477:Small hydrophilic plant seed protein	-	110	24	451	333	1061	1125	2158	804	74.4696	12.2063	203.053	141.587	624.28	623.546	1017.65	458.583
gene:GYO_4355	145.87	37.3565	366.4	69.8278	25.3935	22.9812	32.0946	24.3603	2.56208	9.14742e-05	0.000537111	-	Chromosome	4049321	4050463	-	1143	protein_coding	- && PF07687:Peptidase dimerisation domain|PF01546:Peptidase family M20/M25/M40	Peptidase_M20	108	38	426	86	22	22	37	23	23.7962	6.29005	62.4221	11.9007	4.21292	3.96858	5.67863	4.2696
gene:GYO_3204	713.143	830.691	737.1	674.732	466.317	444.999	440.65	558.168	0.630165	9.20096e-05	0.000539511	thiI	Chromosome	2962705	2963910	-	1206	protein_coding	- && PF02568:Thiamine biosynthesis protein (ThiI)|PF02926:THUMP domain	-	528	845	857	831	404	426	508	527	110.259	132.564	119.017	108.987	73.3232	72.8318	73.8932	92.719
gene:GYO_3176	2894.44	2527.46	3075.7	2158.98	1596.33	1707.92	1761.73	1703.1	0.654381	9.58704e-05	0.000561376	-	Chromosome	2939404	2942751	-	3348	protein_coding	- && PF02811:PHP domain|PF14579:Helix-hairpin-helix motif|PF07733:Bacterial DNA polymerase III alpha subunit|PF01336:OB-fold nucleic acid binding domain	tRNA_anti	2143	2571	3576	2659	1383	1635	2031	1608	161.2	145.289	178.89	125.619	90.4157	100.691	106.417	101.907
gene:GYO_1278	193.143	260.513	135.895	138.032	42.7073	67.8989	93.6814	75.1992	1.37444	9.61222e-05	0.000562077	-	Chromosome	1174090	1174407	-	318	protein_coding	- && -	-	143	265	158	170	37	65	108	71	113.25	157.665	83.2156	84.5558	25.4672	42.1449	59.5778	47.3736
gene:GYO_1515	845.507	896.557	546.16	954.043	377.44	514.987	314.874	346.34	1.06156	9.64994e-05	0.000563509	-	Chromosome	1386115	1387515	+	1401	protein_coding	- && PF01522:Polysaccharide deacetylase|PF11738:Protein of unknown function (DUF3298)|PF13739:Domain of unknown function (DUF4163)	Polysacc_deac_1	626	912	635	1175	327	493	363	327	112.529	123.161	75.912	132.654	51.0878	72.5551	45.4524	49.5239
gene:GYO_1460	1329.04	1122.66	1018.35	930.496	668.311	710.327	690.467	721.277	0.655821	9.75634e-05	0.000568942	-	Chromosome	1343745	1344644	-	900	protein_coding	- && PF13743:Thioredoxin	-	984	1142	1184	1146	579	680	796	681	275.348	240.071	220.335	201.402	140.813	155.785	155.152	160.55
gene:GYO_3386	118.857	69.7977	164.278	112.049	201.994	273.685	307.067	303.974	-1.22426	9.80126e-05	0.000570779	-	Chromosome	3126458	3127003	+	546	protein_coding	- && -	-	88	71	191	138	175	262	354	287	40.59	24.6027	58.5889	39.9768	70.154	98.939	113.736	111.531
gene:GYO_3093	398.442	195.63	288.131	342.643	114.271	154.601	160.473	139.807	1.10279	9.94463e-05	0.000578234	lysC	Chromosome	2855472	2856701	-	1230	protein_coding	- && PF00696:Amino acid kinase family|PF13840:ACT domain|PF01842:ACT domain	AA_kinase	295	199	335	422	99	148	185	132	60.4013	30.6101	45.6157	54.2662	17.6172	24.8094	26.3849	22.7706
gene:GYO_2334	37.8182	28.5089	69.6676	34.9139	101.574	121.173	94.5488	110.151	-1.31576	9.95644e-05	0.000578234	-	Chromosome	2203170	2205068	+	1899	protein_coding	- && PF13243:Squalene-hopene cyclase C-terminal domain|PF13249:Squalene-hopene cyclase N-terminal domain	-	28	29	81	43	88	116	109	104	3.71332	2.88928	7.14389	3.5815	10.143	12.5948	10.0691	11.6202
gene:GYO_0730	72.9351	43.2549	237.386	299.61	515.95	887.908	975.848	811.304	-2.28591	0.000100119	0.000580663	-	Chromosome	667194	668222	-	1029	protein_coding	- && PF00487:Fatty acid desaturase	-	54	44	276	369	447	850	1125	766	13.2162	8.0901	44.923	56.7195	95.0822	170.319	191.79	157.95
Novel00114	12.1558	19.6613	13.7615	19.4868	305.877	64.7651	42.5036	36.0109	-2.78079	0.000100796	0.000583793	-	Chromosome	923274	924477	-	1204	-	PF00015:Methyl-accepting chemotaxis protein (MCP) signalling domain|PF00005:ABC transporter	ABC_tran	9	20	16	24	265	62	49	34	1.88255	3.14282	2.22571	3.15287	48.1755	10.6175	7.13934	5.99181
gene:GYO_3469	189.091	243.801	183.2	133.972	71.5636	103.415	98.8859	90.0272	1.03973	0.000101134	0.000584954	-	Chromosome	3204007	3204255	-	249	protein_coding	- && PF14166:YueH-like protein	-	140	248	213	165	62	99	114	85	141.598	188.438	143.27	104.811	54.5004	81.9775	80.3145	72.4311
gene:GYO_3161	1099.43	683.231	782.685	705.586	1329.7	1703.74	1372.26	1581.3	-0.873512	0.000101612	0.00058692	phoR	Chromosome	2924201	2925940	-	1740	protein_coding	- && PF00989:PAS fold|PF02518:Histidine kinase-, DNA gyrase B-, and HSP90-like ATPase|PF16736:PAS domain of|PF00512:His Kinase A (phospho-acceptor) domain	HATPase_c	814	695	910	869	1152	1631	1582	1493	117.816	75.5705	87.5925	78.9937	144.914	193.27	159.494	182.061
gene:GYO_3647	640.208	740.249	536.698	451.445	313.956	339.494	363.449	303.974	0.84083	0.000103362	0.000596224	-	Chromosome	3370086	3371939	+	1854	protein_coding	- && PF00884:Sulfatase	Sulfatase	474	753	624	556	272	325	419	287	64.387	76.8426	56.3702	47.4337	32.1119	36.1437	39.6454	32.8456
gene:GYO_3494	122.909	80.6115	98.0507	86.0668	30.0105	43.8731	51.1778	52.9572	1.1113	0.000106118	0.000611292	-	Chromosome	3235591	3236187	-	597	protein_coding	- && PF00174:Oxidoreductase molybdopterin binding domain	-	91	82	114	106	26	42	59	50	38.3881	25.987	31.982	28.0836	9.53249	14.5055	17.3367	17.7706
gene:GYO_2322	252.572	70.7808	529.818	631.698	1066.53	2780.72	2287.39	1591.89	-2.37875	0.000107214	0.00061677	-	Chromosome	2193729	2195237	-	1509	protein_coding	- && PF00474:Sodium:solute symporter family	-	187	72	616	778	924	2662	2637	1503	31.2091	9.02734	68.3701	81.5478	134.026	363.729	306.555	211.337
gene:GYO_3248	341.714	212.342	330.276	271.192	382.057	867.017	783.281	689.502	-1.23719	0.000110998	0.000637675	-	Chromosome	3007449	3008597	-	1149	protein_coding	- && PF05975:Bacterial ABC transporter protein EcsB	-	253	216	384	334	331	830	903	651	55.4536	35.5672	55.974	45.9778	63.0544	148.942	137.866	120.217
gene:GYO_0174	1619.43	4445.43	1098.34	918.317	674.083	389.635	473.612	463.905	2.01381	0.000111442	0.000639367	truA	Chromosome	153021	153764	+	744	protein_coding	- && PF01416:tRNA pseudouridine synthase	-	1199	4522	1277	1131	584	373	546	438	405.859	1149.94	287.47	240.443	171.809	103.37	128.738	124.913
gene:GYO_2436	201.247	233.97	394.783	350.763	604.828	530.656	654.902	695.857	-1.07125	0.000113755	0.000651529	-	Chromosome	2290147	2291121	-	975	protein_coding	- && PF00294:pfkB family carbohydrate kinase	PfkB	149	238	459	432	524	508	755	657	38.4867	46.1837	78.8466	70.0811	117.634	107.428	135.841	142.977
gene:GYO_1444	5.4026	0	0	0	15.0053	15.669	14.7461	18.0054	-3.87532	0.000113868	0.000651529	-	Chromosome	1326120	1327034	+	915	protein_coding	- && PF00528:Binding-protein-dependent transport system inner membrane component|PF12911:N-terminal TM domain of oligopeptide transport permease C	BPD_transp_1	4	0	0	0	13	15	17	17	1.10095	0	0	0	3.10978	3.3801	3.25924	3.94215
gene:GYO_4258	0	0.983067	2.58028	4.05976	15.0053	32.3825	13.0113	9.53229	-3.08162	0.000115988	0.000662766	-	Chromosome	3948556	3948888	-	333	protein_coding	- && PF02255:PTS system, Lactose/Cellobiose specific IIA subunit	-	0	1	3	5	13	31	15	9	0	0.568162	1.50887	2.37491	8.54489	19.1945	7.90197	5.73461
gene:GYO_0063	5304	3580.33	6589.18	7923.02	9296.34	13722.9	19128.4	15426.4	-1.29908	0.000118835	0.000678123	-	Chromosome	58855	59472	+	618	protein_coding	- && PF14693:Ribosomal protein TL5, C-terminal domain|PF01386:Ribosomal L25p family	-	3927	3642	7661	9758	8054	13137	22052	14565	1600.3	1114.98	2076.21	2497.43	2852.53	4382.95	6259.62	5000.66
gene:GYO_2896	632.104	192.681	240.826	320.721	162.749	77.3003	75.4656	91.0863	1.76964	0.000119571	0.000681412	-	Chromosome	2678516	2678875	+	360	protein_coding	- && PF01638:HxlR-like helix-turn-helix	DUF24	468	196	280	395	141	74	87	86	327.396	103.008	130.266	173.547	85.7282	42.3827	42.3941	50.6875
gene:GYO_3558	1049.45	222.173	768.064	776.226	2369.68	2873.69	2944.03	1547.41	-1.78995	0.000120629	0.000686522	-	Chromosome	3294986	3295888	-	903	protein_coding	- && PF00528:Binding-protein-dependent transport system inner membrane component	BPD_transp_1	777	226	893	956	2053	2751	3394	1461	216.702	47.3519	165.63	167.453	497.632	628.148	659.344	343.295
gene:GYO_4405	101.299	95.3575	170.299	207.86	218.153	557.815	543.873	391.883	-1.57166	0.000122149	0.000694244	-	Chromosome	4097035	4098612	+	1578	protein_coding	- && PF00999:Sodium/hydrogen exchanger family	Na_H_Exchanger	75	97	198	256	189	534	627	370	11.9697	11.63	21.0152	25.6599	26.2157	69.7739	69.7026	49.7508
Novel00303	12.1558	8.8476	10.3211	10.5554	39.2445	19.8474	44.2384	26.4786	-1.64416	0.00012275	0.000696727	-	Chromosome	2020910	2021367	+	458	-	PF00717:Peptidase S24-like	Peptidase_S24	9	9	12	13	34	19	51	25	4.94887	3.71786	4.38824	4.48952	16.2488	8.55356	19.5341	11.5819
gene:GYO_0687	2670.23	3361.11	2183.78	2109.45	1461.28	1535.56	1553.55	1409.72	0.792393	0.000124385	0.000705069	ndoA	Chromosome	635700	636050	+	351	protein_coding	- && PF02452:PemK-like, MazF-like toxin of type II toxin-antitoxin system	-	1977	3419	2539	2598	1266	1470	1791	1331	1418.5	1842.93	1211.52	1170.72	789.467	863.514	895.111	804.593
gene:GYO_4029	195.844	49.1533	289.852	172.946	529.801	605.867	629.747	733.986	-1.81989	0.000125517	0.00071054	ureC	Chromosome	3749561	3751270	-	1710	protein_coding	- && PF01979:Amidohydrolase family|PF00449:Urease alpha-subunit, N-terminal domain	Amidohydro_1	145	50	337	213	459	580	726	693	21.3551	5.53211	33.0072	19.7018	58.7522	69.9344	74.4781	85.9889
gene:GYO_0034	236.364	120.917	136.755	168.886	248.164	478.426	412.025	403.534	-1.2223	0.000126942	0.000717652	-	Chromosome	35917	36531	+	615	protein_coding	- && PF10112:5-bromo-4-chloroindolyl phosphate hydrolysis protein	-	175	123	159	208	215	458	475	381	71.6626	37.8396	43.3009	53.4946	76.5192	153.55	135.49	131.448
gene:GYO_4410	475.429	2943.3	706.997	963.786	337.041	275.774	209.916	336.808	2.13439	0.000130439	0.000736442	-	Chromosome	4103410	4104756	+	1347	protein_coding	- && PF02447:GntP family permease	-	352	2994	822	1187	292	264	242	318	65.8119	420.534	102.207	139.381	47.4485	40.4106	31.5164	50.0916
gene:GYO_1464	151.273	187.766	79.1286	117.733	58.8668	61.6313	49.443	31.7743	1.40791	0.000130851	0.000737792	-	Chromosome	1346741	1347106	+	366	protein_coding	- && -	-	112	191	92	145	51	59	57	30	77.0666	98.7345	42.1	62.6626	30.4998	33.2376	27.3201	17.3918
gene:GYO_1908	942.754	135.663	1438.08	307.73	163.904	123.263	106.693	121.801	2.45366	0.000131621	0.000741152	sat	Chromosome	1735792	1736940	+	1149	protein_coding	- && PF01747:ATP-sulfurylase|PF14306:PUA-like domain	-	698	138	1672	379	142	118	123	115	152.991	22.7235	243.72	52.1724	27.0505	21.1749	18.779	21.2365
gene:GYO_1635	1175.07	185.8	2188.94	1680.74	5423.83	6457.71	9095.77	5392.1	-2.33372	0.000131932	0.000741919	ohrB	Chromosome	1489004	1489414	+	411	protein_coding	- && PF02566:OsmC-like protein	-	870	189	2545	2070	4699	6182	10486	5091	533.098	87.0035	1037.1	796.618	2502.48	3101.32	4475.65	2628.25
gene:GYO_4097	68.8831	264.445	339.737	174.57	520.567	845.08	662.709	916.159	-1.79424	0.000134335	0.000754436	-	Chromosome	3801260	3803377	-	2118	protein_coding	- && PF13183:4Fe-4S dicluster domain|PF02754:Cysteine-rich domain	-	51	269	395	215	451	809	764	865	6.0642	24.0294	31.2353	16.0559	46.6077	78.7556	63.2784	86.6554
gene:GYO_2966	320.104	63.8993	615.827	133.16	50.7871	65.8097	57.2498	39.1883	2.41061	0.000137254	0.000769815	-	Chromosome	2734931	2735854	-	924	protein_coding	- && PF00291:Pyridoxal-phosphate dependent enzyme	PALP	237	65	716	164	44	63	66	37	64.596	13.3094	129.782	28.0733	10.4229	14.0581	12.5303	8.4964
gene:GYO_3777	151.273	73.73	80.8488	85.2549	189.297	291.443	234.204	186.409	-1.21383	0.000138701	0.000776909	-	Chromosome	3492712	3493395	-	684	protein_coding	- && PF01177:Asp/Glu/Hydantoin racemase	Asp_Glu_race	112	75	94	105	164	279	270	176	41.2374	20.7454	23.0169	24.2803	52.4801	84.1021	69.2462	54.5961
gene:GYO_1250	1191.27	1191.48	1047.59	908.574	1424.35	3026.2	2343.77	2128.88	-1.04065	0.000139273	0.000779088	-	Chromosome	1148638	1150023	+	1386	protein_coding	- && PF03471:Transporter associated domain|PF01595:Domain of unknown function DUF21	-	882	1212	1218	1119	1234	2897	2702	2010	160.264	165.446	147.183	127.699	194.876	430.967	341.988	307.708
gene:GYO_1007	1000.83	1690.87	1137.04	1106.69	756.035	627.804	698.273	606.889	0.876405	0.000140865	0.000786956	-	Chromosome	929530	931086	-	1557	protein_coding	- && PF12848:ABC transporter|PF00005:ABC transporter	ABC_tran	741	1720	1322	1363	655	601	805	573	119.856	209.005	142.206	138.461	92.0789	79.5875	90.6975	78.0857
gene:GYO_4378	268.779	231.021	148.796	223.287	724.87	517.076	365.184	397.179	-1.20222	0.000141458	0.000789235	-	Chromosome	4069508	4070824	-	1317	protein_coding	- && PF07690:Major Facilitator Superfamily	MFS_1	199	235	173	275	628	495	421	375	38.0537	33.7597	22.0006	33.027	104.371	77.4958	56.077	60.4158
gene:GYO_0652	229.61	31.4581	364.68	307.73	712.173	1408.12	1868.42	997.713	-2.41691	0.000143995	0.00080234	-	Chromosome	604448	606172	+	1725	protein_coding	- && PF00205:Thiamine pyrophosphate enzyme, central domain|PF02776:Thiamine pyrophosphate enzyme, N-terminal TPP binding domain|PF02775:Thiamine pyrophosphate enzyme, C-terminal TPP binding domain	TPP_enzyme_N	170	32	424	379	617	1348	2154	942	24.8193	3.50976	41.1672	34.7514	78.2895	161.124	219.051	115.869
gene:GYO_0471	40.5195	45.2211	43.8648	42.2215	13.851	19.8474	13.8787	25.4194	1.24125	0.000144678	0.000805088	-	Chromosome	406233	406871	+	639	protein_coding	- && PF01674:Lipase (class 2)	-	30	46	51	52	12	19	16	24	11.8236	13.6199	13.3673	12.8714	4.11043	6.13072	4.39245	7.96922
gene:GYO_1828	9909.72	9503.31	8793.6	9607.01	13937.6	15033.9	11894.1	16802.2	-0.608865	0.000145926	0.000810976	pyc	Chromosome	1657644	1661090	+	3447	protein_coding	- && PF00682:HMGL-like|PF00289:Carbamoyl-phosphate synthase L chain, N-terminal domain|PF02785:Biotin carboxylase C-terminal domain|PF00364:Biotin-requiring enzyme|PF02786:Carbamoyl-phosphate synthase L chain, ATP binding domain|PF02436:Conserved carboxyl	CPSase_L_D2	7337	9667	10224	11832	12075	14392	13712	15864	536.052	530.6	496.769	542.923	766.749	860.872	697.827	976.51
gene:GYO_4308	193.143	197.596	264.909	254.953	353.201	602.733	686.13	373.878	-1.14569	0.000148373	0.000823498	-	Chromosome	3995643	3996314	-	672	protein_coding	- && PF11738:Protein of unknown function (DUF3298)|PF13739:Domain of unknown function (DUF4163)	-	143	201	308	314	306	577	791	353	53.5915	56.5905	76.7638	73.9064	99.6688	177.038	206.488	111.458
gene:GYO_1949	10705.3	12227.4	6902.25	11051.5	6549.22	5329.54	4849.75	4967.38	0.914218	0.000148637	0.000823888	rpsP	Chromosome	1777206	1777478	+	273	protein_coding	- && PF00886:Ribosomal protein S16	-	7926	12438	8025	13611	5674	5102	5591	4690	7311.74	8619.94	4923.31	7885.86	4549.19	3853.34	3592.65	3645.15
gene:GYO_2440	333.611	268.377	596.905	437.642	782.582	872.24	991.462	865.32	-1.1002	0.00014917	0.00082577	kduD	Chromosome	2293229	2293993	+	765	protein_coding	- && PF00106:short chain dehydrogenase	adh_short	247	273	694	539	678	835	1143	817	81.3139	67.5177	151.94	111.442	193.988	225.053	262.104	226.603
gene:GYO_0845	4.05195	3.93227	6.02066	13.8032	46.17	29.2488	20.8181	25.4194	-2.08047	0.000151482	0.000837477	-	Chromosome	760756	761703	+	948	protein_coding	- && PF01238:Phosphomannose isomerase type I	-	3	4	7	17	40	28	24	24	0.796971	0.798304	1.2367	2.83637	9.23547	6.08988	4.44111	5.37166
gene:GYO_0520	395.74	177.935	178.899	236.278	66.9466	125.352	104.958	72.0217	1.41651	0.000152506	0.000842046	aroK	Chromosome	453103	453663	+	561	protein_coding	- && PF01202:Shikimate kinase	SKI	293	181	208	291	58	120	121	68	131.533	61.0425	62.0977	82.045	22.6294	44.1039	37.8365	25.7188
Novel00067	10.8052	7.86453	19.7822	18.6749	310.494	58.4975	40.7688	29.656	-2.93377	0.000152746	0.000842279	-	Chromosome	606881	608138	+	1258	-	PF01566:Natural resistance-associated macrophage protein	-	8	8	23	23	269	56	47	28	1.60154	1.20317	3.06212	2.8918	46.8036	9.17839	6.55398	4.72262
gene:GYO_1709	16.2078	25.5597	22.3624	16.239	6.92551	7.31219	3.46968	4.23657	1.89766	0.000156524	0.000861997	-	Chromosome	1553944	1554234	+	291	protein_coding	- && PF11514:Protein of unknown function (DUF3219)	-	12	26	26	20	6	7	4	4	10.3853	16.9043	14.9643	10.8707	4.513	4.9598	2.41132	2.91657
gene:GYO_1621	136.416	21.6275	301.893	323.157	691.396	1333.95	1411.29	1081.39	-2.52727	0.000157259	0.000863857	-	Chromosome	1477931	1478791	-	861	protein_coding	- && PF02274:Amidinotransferase	-	101	22	351	398	599	1277	1627	1021	29.5425	4.83433	68.2777	73.1142	152.276	305.806	331.492	251.61
gene:GYO_3140	1019.74	271.326	270.069	617.083	86.5688	211.009	130.98	145.103	1.92363	0.000157268	0.000863857	-	Chromosome	2902632	2903327	-	696	protein_coding	- && PF04172:LrgB-like family	-	755	276	314	760	75	202	151	137	273.191	75.0268	75.5606	172.713	23.5863	59.8413	38.0589	41.7654
gene:GYO_0843	54.026	36.3735	64.507	50.341	143.127	150.422	86.742	93.2046	-1.20301	0.000160683	0.00088148	-	Chromosome	759118	759831	+	714	protein_coding	- && PF00392:Bacterial regulatory proteins, gntR family|PF07702:UTRA domain	UTRA	40	37	75	62	124	144	100	88	14.1088	9.80438	17.5929	13.7346	38.0129	41.5837	24.5691	26.1511
gene:GYO_1867	791.481	1494.26	1037.27	1356.77	659.077	443.954	594.183	606.889	1.02291	0.000162891	0.000892439	spoVE	Chromosome	1693898	1694998	+	1101	protein_coding	- && PF01098:Cell cycle protein	-	586	1520	1206	1671	571	425	685	573	134.042	261.2	183.457	240.055	113.516	79.5904	109.142	110.426
gene:GYO_2768	54.026	27.5259	53.3258	84.4429	103.883	158.779	169.147	152.517	-1.41034	0.000163609	0.000895225	-	Chromosome	2567155	2567637	-	483	protein_coding	- && PF04306:Protein of unknown function (DUF456)	-	40	28	62	104	90	152	195	144	20.8565	10.968	21.4991	34.0571	40.7852	64.8867	70.8232	63.2588
gene:GYO_3744	18.9091	17.6952	17.2019	19.4868	41.553	45.9623	32.962	43.4249	-1.15775	0.000166009	0.00090719	-	Chromosome	3460936	3462225	-	1290	protein_coding	- && PF07745:Glycosyl hydrolase family 53	-	14	18	20	24	36	44	38	41	2.73318	2.63997	2.59666	2.94268	6.10829	7.0327	5.16752	6.74372
gene:GYO_1345	37.8182	9.83067	116.973	94.1864	319.728	410.527	432.843	210.77	-2.40386	0.000167313	0.000913141	-	Chromosome	1230907	1231806	-	900	protein_coding	- && PF00106:short chain dehydrogenase	adh_short	28	10	136	116	277	393	499	199	7.83511	2.1022	25.3088	20.3862	67.3666	90.0345	97.2627	46.9154
gene:GYO_0614	509.195	414.854	323.395	243.585	132.739	186.983	160.473	202.296	1.12476	0.000169261	0.000922591	-	Chromosome	565581	565934	+	354	protein_coding	- && -	-	377	422	376	300	115	179	185	191	268.205	225.541	177.893	134.042	71.1053	104.258	91.6762	114.482
gene:GYO_2345	12.1558	17.6952	51.6056	47.0932	88.8773	109.683	181.291	105.914	-1.90327	0.00017114	0.000931638	-	Chromosome	2219509	2220123	-	615	protein_coding	- && PF02457:DisA bacterial checkpoint controller nucleotide-binding|PF10372:Bacterial membrane-spanning protein N-terminus	-	9	18	60	58	77	105	209	100	3.6855	5.5375	16.34	14.9168	27.4046	35.2025	59.6155	34.5009
Novel00558	4.05195	5.8984	9.46103	10.5554	65.7923	30.2933	30.3597	14.828	-2.20131	0.000172787	0.000939406	-	Chromosome	3520683	3521101	+	419	-	-	-	3	6	11	13	57	29	35	14	1.80317	2.70928	4.39697	4.9074	29.7761	14.2706	14.6535	7.08956
gene:GYO_1710	2239.38	381.43	492.834	617.895	320.882	173.403	85.0072	112.269	2.43215	0.000176213	0.000956811	-	Chromosome	1554355	1554540	-	186	protein_coding	- && PF09953:Uncharacterized protein conserved in bacteria (DUF2187)	-	1658	388	573	761	278	166	98	106	2244.92	394.671	515.961	647.133	327.144	184.015	92.4275	120.92
gene:GYO_3144	1156.16	1352.7	755.162	867.976	630.221	553.637	458.865	449.077	0.981974	0.000178722	0.000969199	-	Chromosome	2906573	2907355	+	783	protein_coding	- && PF00702:haloacid dehalogenase-like hydrolase	Hydrolase	856	1376	878	1069	546	530	529	424	275.322	332.486	187.805	215.942	152.629	139.564	118.517	114.897
gene:GYO_3842	49.974	58.0009	29.2432	39.7856	130.43	129.53	75.4656	87.9089	-1.26304	0.000179291	0.000971045	-	Chromosome	3559143	3559616	+	474	protein_coding	- && PF01047:MarR family	MarR	37	59	34	49	113	124	87	83	19.6586	23.55	12.0137	16.3508	52.1804	53.9389	32.198	37.154
gene:GYO_4094	1089.97	819.878	757.743	644.689	482.477	433.508	444.119	277.496	1.01522	0.000180181	0.000972989	-	Chromosome	3799419	3799541	-	123	protein_coding	- && -	-	807	834	881	794	418	415	512	262	1652.33	1282.85	1199.63	1021.03	743.838	695.668	730.219	451.962
gene:GYO_0678	842.806	1122.66	1131.02	1069.34	597.902	645.562	500.502	736.105	0.74949	0.000180204	0.000972989	-	Chromosome	626397	627770	+	1374	protein_coding	- && PF08245:Mur ligase middle domain|PF01225:Mur ligase family, catalytic domain|PF02875:Mur ligase family, glutamate ligase domain	-	624	1142	1315	1317	518	618	577	695	114.374	157.252	160.293	151.608	82.5183	92.7386	73.6677	107.326
gene:GYO_1653	1114.29	932.93	616.687	656.869	522.876	319.647	369.521	306.092	1.12871	0.000180335	0.000972989	-	Chromosome	1504474	1504596	+	123	protein_coding	- && -	-	825	949	717	809	453	306	426	289	1689.19	1459.75	976.313	1040.32	806.121	512.95	607.565	498.538
Novel00545	20.2597	4.91533	12.9014	7.30756	201.994	33.4271	35.5642	38.1292	-2.78357	0.000181015	0.00097542	-	Chromosome	3409305	3411126	+	1822	-	PF00072:Response regulator receiver domain|PF00486:Transcriptional regulatory protein, C terminal|PF00512:His Kinase A (phospho-acceptor) domain|PF02518:Histidine kinase-, DNA gyrase B-, and HSP90-like ATPase	Trans_reg_C	15	5	15	9	175	32	41	36	2.07335	0.519204	1.37885	0.781296	21.0231	3.62127	3.94751	4.19237
gene:GYO_4341	276.883	181.867	188.361	141.28	395.908	343.673	357.377	478.733	-1.00396	0.000182421	0.000981751	-	Chromosome	4033931	4034377	+	447	protein_coding	- && PF09021:HutP	-	205	185	219	174	343	329	412	452	115.498	78.3034	82.0562	61.5692	167.955	151.757	161.688	214.554
gene:GYO_0954	118.857	32.4412	61.0667	51.9649	151.207	208.92	194.302	188.527	-1.50272	0.000185268	0.000995814	-	Chromosome	871099	871722	+	624	protein_coding	- && PF04854:Protein of unknown function, DUF624	-	88	33	71	64	131	200	224	178	35.5163	10.0057	19.0567	16.2225	45.9509	66.0852	62.9726	60.5258
gene:GYO_4354	76.987	22.6105	147.076	40.5976	9.23401	15.669	13.8787	20.1237	2.28485	0.000187627	0.00100722	-	Chromosome	4047987	4049324	-	1338	protein_coding	- && PF03972:MmgE/PrpD family	-	57	23	171	50	8	15	16	19	10.7287	3.25228	21.405	5.91066	1.3087	2.3115	2.09774	3.01303
gene:GYO_2187	461.922	249.699	233.945	259.012	113.117	149.378	145.727	149.339	1.10693	0.000187981	0.00100749	-	Chromosome	2047389	2047985	+	597	protein_coding	- && PF09335:SNARE associated Golgi protein	-	342	254	272	319	98	143	168	141	144.272	80.4963	76.3079	84.5158	35.9301	49.3879	49.3655	50.113
gene:GYO_1746	1443.84	2857.78	863.534	908.574	721.407	379.189	331.355	274.318	1.83203	0.000188324	0.00100749	-	Chromosome	1587836	1588354	+	519	protein_coding	- && PF04308:Ribonuclease H-like	-	1069	2907	1004	1119	625	363	382	259	518.728	1059.73	323.997	341.024	263.585	144.211	129.117	105.886
gene:GYO_1964	47.2727	67.8316	34.4037	38.9737	107.345	98.1922	85.0072	110.151	-1.09221	0.000188387	0.00100749	smf	Chromosome	1786258	1787058	+	801	protein_coding	- && PF02481:DNA recombination-mediator protein A	SMF	35	69	40	48	93	94	98	104	11.0044	16.298	8.36378	9.4783	25.4131	24.1966	21.4626	27.549
gene:GYO_3980	180.987	197.596	368.12	302.046	550.578	502.452	526.524	797.535	-1.17775	0.000193369	0.00103284	-	Chromosome	3697584	3699485	-	1902	protein_coding	- && PF04740:LXG domain of WXG superfamily|PF15637:HNH/Endo VII superfamily nuclease toxin with a HHH motif|PF14449:Pre-toxin TG	-	134	201	428	372	477	481	607	753	17.7429	19.9941	37.6884	30.9353	54.8928	52.1427	55.9843	84.002
gene:GYO_3878	1528.94	1539.48	943.523	1160.28	2139.98	2952.03	2604	2064.27	-0.916772	0.00019641	0.00104777	-	Chromosome	3592298	3593794	-	1497	protein_coding	- && PF07196:Flagellin hook IN motif|PF07195:Flagellar hook-associated protein 2 C-terminus|PF02465:Flagellar hook-associated protein 2 N-terminus	-	1132	1566	1097	1429	1854	2826	3002	1949	190.438	197.919	122.733	150.984	271.079	389.233	351.785	276.246
gene:GYO_3229	2221.82	3222.49	2265.49	2219.06	1218.89	1350.67	1334.96	1734.88	0.816107	0.000197002	0.00104961	-	Chromosome	2989944	2990549	-	606	protein_coding	- && PF01588:Putative tRNA binding domain|PF14794:Domain of unknown function (DUF4479)	-	1645	3278	2634	2733	1056	1293	1539	1638	683.632	1023.42	727.978	713.327	381.416	439.931	445.507	573.517
gene:GYO_3194	8988.57	5668.36	5896.8	5755.92	2294.65	4121.98	3277.11	3372.31	1.00959	0.000199362	0.00106086	ytgI	Chromosome	2954645	2955148	-	504	protein_coding	- && PF08534:Redoxin	-	6655	5766	6856	7089	1988	3946	3778	3184	3325.42	2164.52	2278.32	2224.72	863.362	1614.3	1314.98	1340.44
gene:GYO_3056	3152.42	1487.38	3600.35	3041.57	5848.59	6996.72	5149.01	7818.6	-1.19408	0.000201294	0.00106852	-	Chromosome	2818802	2820094	-	1293	protein_coding	- && PF00202:Aminotransferase class-III	Aminotran_3	2334	1513	4186	3746	5067	6698	5936	7382	454.602	221.389	542.22	458.238	857.748	1068.08	805.348	1211.38
gene:GYO_1641	31.0649	53.0856	79.1286	68.2039	56.5583	315.469	265.431	312.447	-2.03227	0.000201304	0.00106852	-	Chromosome	1494621	1495580	-	960	protein_coding	- && PF00082:Subtilase family	Peptidase_S8	23	54	92	84	49	302	306	295	6.03373	10.6424	16.0506	13.8398	11.172	64.8626	55.9163	65.2013
gene:GYO_1177	692.883	432.549	365.54	387.301	282.792	141.021	198.639	190.646	1.20692	0.000204322	0.00108319	-	Chromosome	1077164	1077237	+	74	protein_coding	- && -	-	513	440	425	477	245	135	229	180	1745.88	1124.96	961.905	1019.55	724.672	376.15	542.865	516.115
gene:GYO_4401	203.948	71.7639	144.496	137.22	45.0158	68.9435	53.7801	33.8926	1.46274	0.000205121	0.00108607	-	Chromosome	4095108	4095539	-	432	protein_coding	- && PF01047:MarR family	MarR	151	73	168	169	39	66	62	32	88.0284	31.971	65.1329	61.8764	19.7601	31.5006	25.1765	15.7171
gene:GYO_3273	16.2078	6.88147	6.88075	5.68366	27.702	26.115	24.2878	27.5377	-1.63278	0.000207417	0.00109686	-	Chromosome	3032851	3033351	-	501	protein_coding	- && -	-	12	7	8	7	24	25	28	26	6.03216	2.64348	2.67441	2.20995	10.4853	10.2887	9.80412	11.0114
gene:GYO_4485	105.351	119.934	87.7296	92.5625	61.1753	30.2933	41.6362	18.0054	1.42569	0.000211223	0.00111561	-	Chromosome	4177224	4177703	+	480	protein_coding	- && -	-	78	122	102	114	53	29	48	17	40.9244	48.0878	35.5905	37.5652	24.1681	12.4571	17.5424	7.51472
gene:GYO_2740	1.35065	0	0	0	9.23401	9.40138	6.07194	4.23657	-4.599	0.000215038	0.00113434	-	Chromosome	2544823	2544893	+	71	protein_coding	- && -	-	1	0	0	0	8	9	7	4	3.54708	0	0	0	24.6626	26.1362	17.2953	11.9538
gene:GYO_2559	488.935	336.209	506.595	425.463	826.444	633.027	764.197	733.986	-0.751646	0.000216489	0.00114059	ribA	Chromosome	2394981	2396177	-	1197	protein_coding	- && PF00926:3,4-dihydroxy-2-butanone 4-phosphate synthase|PF00925:GTP cyclohydrolase II	DHBP_synthase	362	342	589	524	716	606	881	693	76.163	54.0566	82.4131	69.2403	130.926	104.385	129.113	122.841
gene:GYO_1352	617.247	636.044	527.237	394.608	326.653	272.64	322.68	323.039	0.803443	0.000221018	0.00116301	-	Chromosome	1235368	1235874	+	507	protein_coding	- && PF00717:Peptidase S24-like	Peptidase_S24	457	647	613	486	283	261	372	305	227.006	241.442	202.501	151.618	122.176	106.143	128.713	127.643
Novel00307	1.35065	3.93227	1.72019	0	17.3138	12.5352	11.2765	9.53229	-2.88304	0.000221412	0.00116364	-	Chromosome	2034080	2034232	-	153	-	-	-	1	4	2	0	15	12	13	9	1.64603	4.94635	2.18934	0	21.4589	16.1714	14.9053	12.4812
gene:GYO_1296	2856.62	2122.44	2531.26	2862.94	1413.96	1896.99	1125.91	1328.17	0.847584	0.000222897	0.00117	serC	Chromosome	1188372	1189451	-	1080	protein_coding	- && PF00266:Aminotransferase class-V	Aminotran_5	2115	2159	2943	3526	1225	1816	1298	1254	493.192	378.221	456.396	516.393	248.267	346.698	210.833	246.365
Novel00248	117.507	71.7639	92.03	90.1266	784.891	176.537	179.556	278.555	-1.93491	0.000225699	0.00118325	-	Chromosome	1682907	1685921	-	3015	-	PF02381:MraZ protein, putative antitoxin-like|PF03717:Penicillin-binding Protein dimerisation domain|PF10079:Bacillithiol biosynthesis BshC|PF01795:MraW methylase family	-	87	73	107	111	680	169	207	263	7.2671	4.58091	5.9439	5.82314	49.3661	11.5574	12.044	18.5086
gene:GYO_4442	432.208	280.174	307.914	371.874	608.29	665.409	557.751	528.512	-0.763477	0.000226442	0.00118482	-	Chromosome	4138467	4139870	-	1404	protein_coding	- && PF00324:Amino acid permease	AA_permease	320	285	358	458	527	637	643	499	57.4	38.4056	42.7062	51.5965	82.1582	93.5473	80.34	75.4117
gene:GYO_4063	2763.43	2711.3	1856.94	2021.76	4607.77	3140.06	5029.3	4825.46	-0.912549	0.000226555	0.00118482	-	Chromosome	3774503	3774886	-	384	protein_coding	- && PF03899:ATP synthase I chain	-	2046	2758	2159	2490	3992	3006	5798	4556	1341.85	1358.88	941.665	1025.63	2275.45	1614.05	2648.71	2517.43
gene:GYO_1051	696.935	80.6115	1390.77	1316.17	3897.91	4958.71	6117.05	4449.46	-2.47855	0.0002273	0.00118726	-	Chromosome	971974	972492	+	519	protein_coding	- && PF01965:DJ-1/PfpI family	DJ-1_PfpI	516	82	1617	1621	3377	4747	7052	4201	250.387	29.8926	521.816	494.012	1424.2	1885.87	2383.6	1717.48
gene:GYO_4362	1122.39	1370.4	813.649	916.693	551.732	690.479	564.691	528.512	0.854122	0.000233028	0.00121568	-	Chromosome	4056327	4057139	-	813	protein_coding	- && PF08282:haloacid dehalogenase-like hydrolase	Hydrolase_3	831	1394	946	1129	478	661	651	499	257.419	324.406	194.884	219.647	128.69	167.637	140.468	130.231
gene:GYO_3854	1850.39	1116.76	2237.96	1784.67	2759.81	3810.69	4897.46	3399.85	-1.08893	0.000235374	0.00122642	uvrA	Chromosome	3567684	3570557	-	2874	protein_coding	- && PF00005:ABC transporter	ABC_tran	1370	1136	2602	2198	2391	3648	5646	3210	120.05	74.7839	151.634	120.966	182.096	261.714	344.621	236.986
gene:GYO_3518	1065.66	522.008	952.124	1070.15	1659.81	1896.99	1672.39	2098.16	-1.02144	0.000244604	0.00127296	-	Chromosome	3255992	3257050	-	1059	protein_coding	- && PF00291:Pyridoxal-phosphate dependent enzyme	PALP	789	531	1107	1318	1438	1816	1928	1981	187.634	94.867	175.076	196.853	297.215	353.573	319.374	396.912
gene:GYO_3556	2065.14	1670.23	1602.35	1242.29	857.609	1000.73	998.401	640.782	0.911029	0.000247102	0.00128439	-	Chromosome	3293365	3294093	+	729	protein_coding	- && PF07702:UTRA domain|PF00392:Bacterial regulatory proteins, gntR family	UTRA	1529	1699	1863	1530	743	958	1151	605	528.213	440.943	428.016	331.96	223.084	270.955	276.972	176.089
gene:GYO_3618	1366.86	1890.44	1868.12	2421.24	1157.71	288.309	529.126	524.276	1.59477	0.000248029	0.00128763	-	Chromosome	3345248	3345928	-	681	protein_coding	- && PF04012:PspA/IM30 family	-	1012	1923	2172	2982	1003	276	610	495	374.251	534.255	534.18	692.6	322.375	83.5643	157.134	154.228
Novel00257	5.4026	0.983067	1.72019	4.05976	114.271	5.22299	18.2158	14.828	-3.67238	0.00024854	0.00128872	-	Chromosome	1727407	1728035	-	629	-	PF02786:Carbamoyl-phosphate synthase L chain, ATP binding domain	CPSase_L_D2	4	1	2	5	99	5	21	14	1.60154	0.300792	0.532543	1.25731	34.4502	1.639	5.85675	4.72262
gene:GYO_0875	228.26	214.309	204.702	206.236	286.254	397.992	557.751	370.7	-0.920501	0.000249189	0.0012896	-	Chromosome	790892	791917	+	1026	protein_coding	- && PF08271:TFIIB zinc-binding	TFIIB_Zn_Ribbon	169	218	238	254	248	381	643	350	41.4829	40.2	38.8512	39.1569	52.9068	76.5661	109.939	72.3812
gene:GYO_4411	1027.84	4494.58	1185.21	1871.55	721.407	617.358	455.396	673.615	1.79788	0.000249316	0.0012896	-	Chromosome	4104780	4106186	+	1407	protein_coding	- && PF03446:NAD binding domain of 6-phosphogluconate dehydrogenase|PF00393:6-phosphogluconate dehydrogenase, C-terminal domain	NAD_binding_2	761	4572	1378	2305	625	591	525	636	136.213	614.793	164.033	259.119	97.2284	86.6069	65.4566	95.911
gene:GYO_2580	194.494	64.8824	236.526	180.253	380.903	502.452	462.335	471.319	-1.42616	0.00025024	0.00129281	spoIIAB	Chromosome	2409741	2410181	-	441	protein_coding	- && PF13581:Histidine kinase-like ATPase domain	-	144	66	275	222	330	481	533	445	82.2344	28.3153	104.441	79.6226	163.788	224.888	212.02	214.105
gene:GYO_3223	3522.49	3602.94	2489.11	3024.52	1341.24	2049.5	1731.37	2010.25	0.825177	0.000256114	0.00132155	aroA	Chromosome	2982442	2983518	-	1077	protein_coding	- && PF01817:Chorismate mutase type II|PF00793:DAHP synthetase I family	-	2608	3665	2894	3725	1162	1962	1996	1898	609.848	643.835	450.047	547.057	236.155	375.614	325.112	373.926
gene:GYO_3935	2342.03	2833.2	3072.25	2592.56	1640.19	1302.61	1228.27	1984.83	0.81672	0.000256819	0.00132358	tarK	Chromosome	3652152	3653321	+	1170	protein_coding	- && PF04464:CDP-Glycerol:Poly(glycerophosphate) glycerophosphotransferase	-	1734	2882	3572	3193	1421	1247	1416	1874	373.244	466.042	511.329	431.653	265.837	219.755	212.308	339.851
Novel00238	0	0	0	0.811951	31.1648	5.22299	3.46968	5.29572	-5.23559	0.000258544	0.00133086	-	Chromosome	1658449	1658637	-	189	-	PF02786:Carbamoyl-phosphate synthase L chain, ATP binding domain	CPSase_L_D2	0	0	0	1	27	5	4	5	0	0	0	0.836874	31.2687	5.45465	3.71267	5.61324
gene:GYO_3703	611.844	421.736	661.412	575.674	378.594	224.589	321.813	243.603	0.958496	0.000260989	0.00134182	-	Chromosome	3425534	3426202	-	669	protein_coding	- && PF00528:Binding-protein-dependent transport system inner membrane component	BPD_transp_1	453	429	769	709	328	215	371	230	170.53	121.324	192.52	167.626	107.314	66.263	97.2828	72.9469
gene:GYO_3379	4573.3	2210.92	5422.89	3886	6127.92	15897.7	10867.9	10038.6	-1.41564	0.000261645	0.00134357	-	Chromosome	3119412	3120941	-	1530	protein_coding	- && PF01145:SPFH domain / Band 7 family|PF15975:Flotillin	-	3386	2249	6305	4786	5309	15219	12529	9478	557.346	278.109	690.19	494.77	759.501	2050.94	1436.52	1314.41
gene:GYO_0424	82.3896	40.3057	68.8075	37.3498	113.117	206.83	109.295	165.226	-1.38521	0.000262455	0.00134611	-	Chromosome	359933	360331	+	399	protein_coding	- && PF10794:Protein of unknown function (DUF2606)	-	61	41	80	46	98	198	126	156	38.5023	19.4414	33.5809	18.235	53.7601	102.318	55.3969	82.9578
gene:GYO_2600	45.9221	20.6444	12.0413	15.4271	3.46275	1.0446	5.20452	6.35486	2.51917	0.000271704	0.00139187	-	Chromosome	2425824	2426171	-	348	protein_coding	- && PF13025:Protein of unknown function (DUF3886)	-	34	21	14	19	3	1	6	6	24.6053	11.4171	6.73789	8.63567	1.8869	0.592488	3.02455	3.65828
gene:GYO_0439	259.325	378.481	231.365	252.517	145.436	153.556	176.086	147.221	0.848325	0.000272957	0.00139661	mmuM	Chromosome	374553	375443	-	891	protein_coding	- && PF02574:Homocysteine S-methyltransferase	-	192	385	269	311	126	147	203	139	54.2691	81.7522	50.5649	55.2083	30.9528	34.0172	39.9675	33.1011
gene:GYO_1236	544.312	1075.48	570.242	613.835	378.594	231.901	359.112	307.152	1.13511	0.000281498	0.00143858	-	Chromosome	1135721	1137076	+	1356	protein_coding	- && PF00209:Sodium:neurotransmitter symporter family	SNF	403	1094	663	756	328	222	414	290	74.8471	152.642	81.8896	88.1828	52.9446	33.7561	53.5586	45.3778
gene:GYO_0958	2.7013	0.983067	7.74084	4.87171	15.0053	20.892	19.9507	16.9463	-2.11011	0.000287404	0.001467	-	Chromosome	875966	876871	+	906	protein_coding	- && PF00528:Binding-protein-dependent transport system inner membrane component	BPD_transp_1	2	1	9	6	13	20	23	16	0.555944	0.208828	1.66375	1.04748	3.14067	4.55157	4.45336	3.74712
gene:GYO_2245	29.7143	31.4581	25.8028	38.9737	56.5583	79.3895	56.3823	64.6077	-1.02257	0.000287926	0.0014679	-	Chromosome	2140209	2141246	+	1038	protein_coding	- && PF00544:Pectate lyase	-	22	32	30	48	49	76	65	61	5.33771	5.83269	4.8406	7.31418	10.3325	15.0965	10.9851	12.4692
gene:GYO_0398	62.1299	48.1703	46.4451	63.3322	93.4943	124.307	85.0072	112.269	-0.917554	0.000292239	0.00148811	-	Chromosome	337063	337866	-	804	protein_coding	- && PF00905:Penicillin binding protein transpeptidase domain	-	46	49	54	78	81	119	98	106	14.4089	11.5307	11.249	15.3448	22.0514	30.5176	21.3825	27.974
gene:GYO_3951	314.701	727.469	421.446	535.076	218.153	274.729	210.783	231.952	1.0963	0.000294679	0.00149874	rbsK	Chromosome	3672821	3673702	+	882	protein_coding	- && PF00294:pfkB family carbohydrate kinase	PfkB	233	740	490	659	189	263	243	219	66.5299	158.738	93.047	118.179	46.903	61.4817	48.331	52.6843
gene:GYO_3291	125.61	180.884	82.569	103.118	54.2498	47.0069	61.5869	58.2529	1.15066	0.000295495	0.00150105	bceR	Chromosome	3052001	3052696	-	696	protein_coding	- && PF00072:Response regulator receiver domain|PF00486:Transcriptional regulatory protein, C terminal	Trans_reg_C	93	184	96	127	47	45	71	55	33.6514	50.0179	23.1013	28.8613	14.7807	13.331	17.8952	16.7671
gene:GYO_1119	45.9221	34.4073	101.491	99.0581	116.579	221.455	315.741	257.372	-1.69271	0.000295838	0.00150105	-	Chromosome	1036127	1037038	-	912	protein_coding	- && PF01370:NAD dependent epimerase/dehydratase family|PF08338:Domain of unknown function (DUF1731)	Epimerase	34	35	118	122	101	212	364	243	9.38887	7.26089	21.6702	21.1586	24.2401	47.9292	70.0156	56.5349
gene:GYO_3219	453.818	244.784	253.728	246.833	736.412	696.747	467.54	623.835	-1.07687	0.000296553	0.00150289	-	Chromosome	2978358	2979551	+	1194	protein_coding	- && PF00850:Histone deacetylase domain	Hist_deacetyl	336	249	295	304	638	667	539	589	70.8703	39.4559	41.3802	40.2709	116.956	115.181	79.1904	104.669
gene:GYO_0786	31.0649	91.4252	43.0047	30.0422	8.07976	10.446	16.481	18.0054	1.87696	0.000296996	0.00150334	-	Chromosome	714500	715393	-	894	protein_coding	- && PF16916:Dimerisation domain of Zinc Transporter|PF01545:Cation efflux family	-	23	93	50	37	7	10	19	17	6.47917	19.6817	9.36715	6.54615	1.71383	2.30633	3.72824	4.03475
gene:GYO_0359	32.4156	27.5259	94.6103	44.6573	132.739	142.065	139.655	154.635	-1.50537	0.000297598	0.0015046	-	Chromosome	303156	304481	-	1326	protein_coding	- && PF00144:Beta-lactamase	Beta-lactamase	24	28	110	55	115	136	161	146	4.55824	3.99513	13.8939	6.56056	18.9829	21.1473	21.2996	23.3622
gene:GYO_2476	448.416	744.182	517.776	453.069	337.041	303.978	287.116	265.845	0.858332	0.000305294	0.00154168	dapB	Chromosome	2325880	2326683	-	804	protein_coding	- && PF05173:Dihydrodipicolinate reductase, C-terminus|PF01113:Dihydrodipicolinate reductase, N-terminus	DapB_N	332	757	602	558	292	291	331	251	103.995	178.138	125.405	109.774	79.4939	74.627	72.2204	66.2404
Novel00205	17.5584	14.746	10.3211	20.2988	40.3988	69.9881	33.8294	33.8926	-1.50303	0.000312463	0.00157601	-	Chromosome	1424979	1425094	-	116	-	PF05067:Manganese containing catalase	-	13	15	12	25	35	67	39	32	28.2238	24.4653	17.326	34.0882	66.0416	119.09	58.9786	58.5325
gene:GYO_3880	13.5065	4.91533	5.16056	5.68366	18.468	24.0258	21.6855	27.5377	-1.71615	0.00031612	0.00159257	hag1	Chromosome	3594371	3595210	-	840	protein_coding	- && PF00669:Bacterial flagellin N-terminal helical region|PF00700:Bacterial flagellin C-terminal helical region	-	10	5	6	7	16	23	25	26	2.99813	1.12618	1.19632	1.31808	4.16915	5.64557	5.22094	6.56749
gene:GYO_2970	971.117	1011.58	1088.88	766.482	705.247	580.797	553.414	567.701	0.67336	0.000317115	0.0015957	-	Chromosome	2737707	2738348	-	642	protein_coding	- && PF07423:Protein of unknown function (DUF1510)	-	719	1029	1266	944	611	556	638	536	282.048	303.247	330.273	232.573	208.312	178.566	174.331	177.148
gene:GYO_1760	3257.77	2040.85	1663.42	2073.72	803.359	1434.23	973.246	1066.56	1.07848	0.00033527	0.00168506	-	Chromosome	1597157	1597741	+	585	protein_coding	- && -	-	2412	2076	1934	2554	696	1373	1122	1007	1038.37	671.41	553.701	690.537	260.412	483.92	336.454	365.24
gene:GYO_2780	729.351	1517.86	922.881	871.224	559.812	447.088	548.21	428.953	1.02661	0.00034233	0.00171851	ispH	Chromosome	2577556	2578500	+	945	protein_coding	- && PF02401:LytB protein	-	540	1544	1073	1073	485	428	632	405	143.91	309.123	190.17	179.593	112.336	93.3837	117.32	90.9345
gene:GYO_2417	210289	23474.7	65266.5	54469.8	30386.8	15234.4	13820.6	15772.8	2.23262	0.000343881	0.00172427	-	Chromosome	2274453	2274653	+	201	protein_coding	- && PF00313:'Cold-shock' DNA-binding domain	CSD	155695	23879	75883	67085	26326	14584	15933	14892	195078	22476.9	63230	52789.9	28667.9	14960.3	13905.6	15720.4
gene:GYO_3748	58.0779	31.4581	45.585	30.8542	77.3348	120.129	82.4049	82.6132	-1.1413	0.000346439	0.00173505	-	Chromosome	3466539	3467804	-	1266	protein_coding	- && PF13416:Bacterial extracellular solute-binding protein	-	43	32	53	38	67	115	95	78	8.5539	4.78226	7.0116	4.74757	11.5837	18.7294	13.1637	13.0727
gene:GYO_3260	8.1039	7.86453	9.46103	10.5554	18.468	45.9623	20.8181	30.7152	-1.67601	0.00034783	0.00173997	-	Chromosome	3018328	3019440	-	1113	protein_coding	- && PF07470:Glycosyl Hydrolase Family 88	-	6	8	11	13	16	44	24	29	1.35764	1.35991	1.65528	1.84744	3.14653	8.1511	3.78272	5.52851
gene:GYO_2505	782.026	966.355	467.891	600.032	384.366	375.011	354.775	324.098	0.968822	0.00035359	0.00176569	-	Chromosome	2351091	2351318	-	228	protein_coding	- && PF02081:Tryptophan RNA-binding attenuator protein	-	579	983	544	739	333	359	409	306	639.548	815.709	399.612	512.662	319.681	324.652	314.685	284.768
gene:GYO_0025	560.52	282.14	313.934	284.995	118.888	157.734	189.098	185.35	1.14289	0.000353802	0.00176569	-	Chromosome	28602	28925	+	324	protein_coding	- && PF02575:YbaB/EbfC DNA-binding family	-	415	287	365	351	103	151	218	175	322.576	167.592	188.679	171.35	69.5824	96.0928	118.032	114.604
gene:GYO_3699	14.8571	5.8984	8.60094	17.051	43.8615	36.5609	26.0226	30.7152	-1.56399	0.000356239	0.00177577	-	Chromosome	3422869	3423522	-	654	protein_coding	- && PF00528:Binding-protein-dependent transport system inner membrane component	BPD_transp_1	11	6	10	21	38	35	30	29	4.23589	1.73576	2.56093	5.07883	12.7178	11.0344	8.04696	9.40861
gene:GYO_0808	199.896	224.139	185.78	159.954	118.888	109.683	131.848	106.973	0.715624	0.000358255	0.00178373	-	Chromosome	725412	726416	+	1005	protein_coding	- && PF00356:Bacterial regulatory proteins, lacI family|PF13377:Periplasmic binding protein-like domain	LacI	148	228	216	197	103	105	152	101	37.0873	42.9225	35.9967	31.0043	22.4325	21.5418	26.5317	21.3236
gene:GYO_2464	772.572	960.456	715.598	646.313	529.801	371.877	332.222	475.555	0.857076	0.000362124	0.00180089	-	Chromosome	2315406	2315891	-	486	protein_coding	- && -	-	572	977	832	796	459	356	383	449	296.407	380.342	286.723	259.059	206.721	151.033	138.245	196.027
gene:GYO_3001	1380.36	2574.65	1149.95	1212.24	867.997	548.414	649.698	706.449	1.1882	0.000362895	0.00180262	apt	Chromosome	2768649	2769161	-	513	protein_coding	- && PF00156:Phosphoribosyl transferase domain	Pribosyltran	1022	2619	1337	1493	752	525	749	667	501.722	965.906	436.505	460.325	320.854	211.009	256.125	275.876
gene:GYO_1128	444.364	418.786	490.253	781.097	752.572	1113.54	1406.96	1551.64	-1.1759	0.000363368	0.00180286	-	Chromosome	1042316	1043305	+	990	protein_coding	- && PF00535:Glycosyl transferase family 2	Glycos_transf_2	329	426	570	962	652	1066	1622	1465	83.6932	81.4125	96.4305	153.696	144.152	222.014	287.411	313.984
gene:GYO_1242	194.494	56.0348	522.077	555.375	977.651	1834.31	2369.79	1282.62	-2.28243	0.000367654	0.00182201	-	Chromosome	1141126	1142121	+	996	protein_coding	- && PF00248:Aldo/keto reductase family	Aldo_ket_red	144	57	607	684	847	1756	2732	1211	36.411	10.8276	102.071	108.622	186.136	363.517	481.182	257.982
gene:GYO_1796	244.468	189.732	197.822	197.304	155.824	104.46	98.8859	88.968	0.888768	0.000375421	0.00185833	-	Chromosome	1630610	1631281	+	672	protein_coding	- && PF10368:Putative cell-wall binding lipoprotein	-	181	193	230	243	135	100	114	84	67.8326	54.3381	57.3236	57.1951	43.9715	30.6824	29.7594	26.5226
gene:GYO_1469	114.805	455.16	198.682	204.612	99.2656	42.8285	67.6588	90.0272	1.70109	0.000376915	0.00186356	-	Chromosome	1350484	1352328	+	1845	protein_coding	- && PF02254:TrkA-N domain|PF00999:Sodium/hydrogen exchanger family|PF02080:TrkA-C domain	Na_H_Exchanger	85	463	231	252	86	41	78	85	11.6025	47.479	20.9696	21.6036	10.2026	4.58191	7.41629	9.77525
gene:GYO_2439	417.351	486.618	868.695	689.347	1162.33	1236.8	1406.09	1122.69	-0.999822	0.000379879	0.00187604	-	Chromosome	2292400	2293227	+	828	protein_coding	- && PF04962:KduI/IolB family	-	309	495	1010	849	1007	1184	1621	1060	93.9848	113.107	204.299	162.181	266.199	294.836	343.432	271.632
gene:GYO_2024	680.728	792.352	647.651	642.254	379.749	517.076	437.18	328.334	0.732368	0.000382834	0.00188751	ribF	Chromosome	1841420	1842370	+	951	protein_coding	- && PF01687:Riboflavin kinase|PF06574:FAD synthetase	-	504	806	753	791	329	495	504	310	133.469	160.351	132.614	131.558	75.7221	107.321	92.969	69.165
gene:GYO_3924	957.611	1616.16	1149.09	1020.62	771.04	510.809	571.63	677.852	0.90664	0.000383089	0.00188751	tagH	Chromosome	3638643	3640226	-	1584	protein_coding	- && PF00005:ABC transporter	ABC_tran	709	1644	1336	1257	668	489	659	640	112.725	196.365	141.262	125.517	92.3057	63.6521	72.9824	85.7295
gene:GYO_2809	41906.6	18435.5	18393.1	28155.2	13045.3	10682.1	11169.8	13493.5	1.14331	0.000385922	0.00189927	rpsU	Chromosome	2601387	2601560	-	174	protein_coding	- && PF01165:Ribosomal protein S21	-	31027	18753	21385	34676	11302	10226	12877	12740	44907.6	20391	20584.2	31521.1	14217.2	12117.6	12982.4	15535.5
gene:GYO_3933	1846.34	1872.74	2245.7	1685.61	876.077	1154.28	1097.29	1418.19	0.750936	0.000390029	0.00191727	tarI	Chromosome	3650413	3651126	+	714	protein_coding	- && PF01128:2-C-methyl-D-erythritol 4-phosphate cytidylyltransferase	-	1367	1905	2611	2076	759	1105	1265	1339	482.169	504.793	612.468	459.887	232.676	319.097	310.8	397.913
gene:GYO_3885	937.351	1499.18	786.126	952.419	1715.22	2276.18	2198.91	1791.01	-0.934963	0.000396842	0.00194851	flgK	Chromosome	3597553	3599076	-	1524	protein_coding	- && PF00460:Flagella basal body rod protein|PF06429:Flagellar basal body rod FlgEFG protein C-terminal	-	694	1525	914	1173	1486	2179	2535	1691	114.684	189.322	100.447	121.74	213.423	294.803	291.797	235.431
gene:GYO_0132	22747.6	40208.4	18055.1	28865.7	16294.6	11105.1	10780.3	13360	1.09214	0.000400549	0.00196444	rplL	Chromosome	120687	121058	+	372	protein_coding	- && PF00542:Ribosomal protein L7/L12 C-terminal domain|PF16320:Ribosomal protein L7/L12 dimerisation domain	-	16842	40901	20992	35551	14117	10631	12428	12614	11402	20802.1	9451.18	15115.8	8306.28	5892.37	5860.66	7194.74
Novel00410	2.7013	3.93227	1.72019	4.87171	12.6968	7.31219	23.4204	27.5377	-2.41319	0.000401543	0.00196705	-	Chromosome	2629914	2630664	+	751	-	PF01510:N-acetylmuramoyl-L-alanine amidase|PF01471:Putative peptidoglycan binding domain	PG_binding_1	2	4	2	6	11	7	27	26	0.670686	1.00771	0.446031	1.26367	3.20597	1.92184	6.30684	7.34579
gene:GYO_1021	152.623	187.766	143.636	168.886	47.3243	69.9881	90.2117	106.973	1.0509	0.000403521	0.00197341	-	Chromosome	944532	945968	+	1437	protein_coding	- && PF00939:Sodium:sulfate symporter transmembrane region	Na_sulph_symp	113	191	167	208	41	67	104	101	19.8039	25.1474	19.4641	22.8943	6.24503	9.6134	12.6959	14.9132
gene:GYO_3403	87.7922	65.8655	98.0507	73.0756	168.521	145.199	144.859	118.624	-0.830406	0.000403768	0.00197341	rhaB	Chromosome	3140759	3142219	-	1461	protein_coding	- && PF02782:FGGY family of carbohydrate kinases, C-terminal domain|PF00370:FGGY family of carbohydrate kinases, N-terminal domain	FGGY_N	65	67	114	90	146	139	167	112	11.2045	8.67643	13.0686	9.74348	21.8731	19.6166	20.0518	16.2657
gene:GYO_3956	1106.18	273.293	2563.08	2654.27	4457.72	8060.12	11102.1	7075.08	-2.21801	0.000410071	0.00200192	-	Chromosome	3677602	3678138	+	537	protein_coding	- && PF08239:Bacterial SH3 domain	SH3_3	819	278	2980	3269	3862	7716	12799	6680	384.095	97.9461	929.431	962.858	1574.15	2962.63	4181.09	2639.41
gene:GYO_0666	1310.13	1905.18	439.508	584.605	3847.12	3166.18	2697.68	3769.49	-1.66928	0.000412772	0.00201279	-	Chromosome	615867	617132	+	1266	protein_coding	- && PF00375:Sodium:dicarboxylate symporter family	SDF	970	1938	511	720	3333	3031	3110	3559	192.96	289.625	67.6024	89.954	576.247	493.641	430.938	596.485
gene:GYO_2147	10.8052	13.7629	47.3052	35.7259	6.92551	6.26759	0.86742	4.23657	2.59426	0.00041932	0.00204238	-	Chromosome	2018151	2018909	+	759	protein_coding	- && PF05908:Protein of unknown function (DUF867)	-	8	14	55	44	6	6	1	4	2.65447	3.48982	12.1366	9.16923	1.73028	1.62993	0.231125	1.11821
Novel00638	22.961	13.7629	15.4817	29.2302	218.153	55.3637	51.1778	42.3657	-2.16968	0.000419943	0.00204308	-	Chromosome	3984199	3985287	-	1089	-	PF01546:Peptidase family M20/M25/M40|PF07687:Peptidase dimerisation domain	M20_dimer	17	14	18	36	189	53	59	40	3.93143	2.4323	2.76834	5.22873	37.9875	10.0348	9.50413	7.79359
gene:GYO_2828	202.597	375.532	193.521	169.698	118.888	98.1922	111.03	106.973	1.11332	0.000421483	0.00204823	comEB	Chromosome	2620893	2621462	-	570	protein_coding	- && PF00383:Cytidine and deoxycytidylate deaminase zinc-binding region	-	150	382	225	209	103	94	128	101	66.2744	126.796	66.1124	57.9953	39.5521	34.0026	39.3934	37.5969
gene:GYO_4239	129.662	209.393	107.512	125.852	61.1753	58.4975	66.7914	85.7906	1.07136	0.000423316	0.00205479	sacY	Chromosome	3932391	3933233	+	843	protein_coding	- && PF00874:PRD domain|PF03123:CAT RNA binding domain	PRD	96	213	125	155	53	56	77	81	28.6796	47.8045	24.8346	29.0821	13.7612	13.6968	16.0233	20.3874
gene:GYO_1291	605.091	339.158	341.457	333.712	235.467	196.384	161.34	211.829	1.00695	0.000424534	0.00205637	-	Chromosome	1185851	1186192	+	342	protein_coding	- && PF08963:Protein of unknown function (DUF1878)	-	448	345	397	411	204	188	186	200	329.899	190.858	194.419	190.08	130.56	113.342	95.4059	124.082
gene:GYO_3487	1973.3	529.873	910.839	857.421	408.605	493.05	255.022	260.549	1.59134	0.000424998	0.00205637	-	Chromosome	3222527	3229666	-	7140	protein_coding	- && PF00975:Thioesterase domain|PF00550:Phosphopantetheine attachment site|PF00501:AMP-binding enzyme|PF13745:HxxPF-repeated domain|PF13193:AMP-binding enzyme C-terminal domain|PF00668:Condensation domain	AMP-binding	1461	539	1059	1056	354	472	294	246	51.5325	14.2826	24.8412	23.3931	10.8521	13.6302	7.22333	7.31042
gene:GYO_2437	236.364	234.953	473.912	366.19	734.104	556.771	741.644	679.97	-1.04627	0.000425089	0.00205637	-	Chromosome	2291159	2292178	-	1020	protein_coding	- && PF13377:Periplasmic binding protein-like domain|PF00356:Bacterial regulatory proteins, lacI family	LacI	175	239	551	451	636	533	855	642	43.2083	44.3317	90.4745	69.9356	136.478	107.742	147.046	133.549
Novel00131	28.3636	23.5936	45.585	23.5466	226.233	68.9435	79.8027	59.312	-1.83846	0.000431298	0.00208404	-	Chromosome	1040721	1042455	-	1735	-	PF13630:SdpI/YhfL protein family|PF00535:Glycosyl transferase family 2|PF00561:alpha/beta hydrolase fold	Abhydrolase_1	21	24	53	29	196	66	92	56	3.04824	2.61715	5.11625	2.64375	24.7266	7.84338	9.302	6.84847
gene:GYO_1736	5.4026	3.93227	4.30047	4.05976	40.3988	9.40138	19.9507	13.7689	-2.24808	0.000433092	0.00209033	-	Chromosome	1580204	1580326	+	123	protein_coding	- && -	-	4	4	5	5	35	9	23	13	8.19001	6.15278	6.80832	6.42964	62.2831	15.0868	32.8028	22.4256
gene:GYO_1895	777.974	1478.53	537.559	630.074	482.477	249.659	282.779	251.017	1.43591	0.000436024	0.0021021	-	Chromosome	1720790	1721701	+	912	protein_coding	- && PF01479:S4 domain|PF00849:RNA pseudouridylate synthase	S4	576	1504	625	776	418	239	326	237	159.059	312.011	114.778	134.583	100.32	54.0334	62.7063	55.139
gene:GYO_2743	5715.95	4049.25	3189.23	4460.05	1880.28	2862.2	1869.29	2492.16	0.935583	0.000437409	0.00210639	-	Chromosome	2545856	2546476	-	621	protein_coding	- && PF00753:Metallo-beta-lactamase superfamily	Lactamase_B	4232	4119	3708	5493	1629	2740	2155	2353	1716.26	1254.92	1000.05	1399.07	574.165	909.741	608.757	803.962
gene:GYO_1418	1712.62	1350.73	1334.87	1196	567.892	899.399	859.614	870.616	0.806019	0.000440597	0.00211934	-	Chromosome	1302173	1302481	+	309	protein_coding	- && PF01883:Domain of unknown function DUF59	-	1268	1374	1552	1473	492	861	991	822	1033.45	841.288	841.217	753.991	348.509	574.518	562.605	564.441
gene:GYO_3089	2689.14	1593.55	1769.21	2340.04	4032.95	3625.8	3160.88	3934.72	-0.814334	0.000445862	0.00214225	-	Chromosome	2851524	2852285	-	762	protein_coding	- && PF13085:2Fe-2S iron-sulfur cluster binding domain|PF13183:4Fe-4S dicluster domain	-	1991	1621	2057	2882	3494	3471	3644	3715	658.03	402.48	452.121	598.22	1003.63	939.201	838.903	1034.45
gene:GYO_0355	278.234	274.276	282.111	316.661	109.654	148.333	164.81	211.829	0.858499	0.000452014	0.00216936	ybbB	Chromosome	298163	299752	-	1590	protein_coding	- && PF12833:Helix-turn-helix domain|PF01497:Periplasmic binding protein	Peripla_BP_2	206	279	328	390	95	142	190	200	32.6287	33.1989	34.5503	38.7962	13.0778	18.4141	20.9626	26.6894
gene:GYO_1734	1705.87	1501.14	1767.49	1507.79	941.869	1163.68	1228.27	917.218	0.608046	0.00046174	0.00221354	-	Chromosome	1578599	1579780	-	1182	protein_coding	- && PF00155:Aminotransferase class I and II	Aminotran_1_2	1263	1527	2055	1857	816	1114	1416	866	269.101	244.421	291.185	248.494	151.105	194.324	210.152	155.455
gene:GYO_3294	359.273	646.858	263.189	293.926	198.531	121.173	189.098	127.097	1.29713	0.000464823	0.00222582	-	Chromosome	3054803	3055780	-	978	protein_coding	- && PF12730:ABC-2 family transporter protein	-	266	658	306	362	172	116	218	120	68.4971	127.293	52.4032	58.5452	38.4943	24.4556	39.1026	26.0344
gene:GYO_1533	41.8701	69.7977	61.9267	61.7083	21.9308	27.1596	33.8294	30.7152	1.05146	0.000473287	0.0022638	-	Chromosome	1400797	1401549	-	753	protein_coding	- && PF00005:ABC transporter	ABC_tran	31	71	72	76	19	26	39	29	10.368	17.8394	16.0145	15.9639	5.52288	7.1193	9.08569	8.17162
gene:GYO_0450	13.5065	9.83067	13.7615	15.4271	40.3988	33.4271	34.6968	22.242	-1.30978	0.000475815	0.00227334	garD	Chromosome	386936	388462	+	1527	protein_coding	- && PF04295:D-galactarate dehydratase / Altronate hydrolase, C terminus|PF08666:SAF domain	-	10	10	16	19	35	32	40	21	1.64926	1.23902	1.75491	1.96805	5.01691	4.32086	4.59525	2.918
gene:GYO_3417	2011.12	976.185	1611.82	1185.45	585.205	751.066	772.872	800.712	0.990545	0.000482781	0.00230397	-	Chromosome	3159509	3160186	-	678	protein_coding	- && PF04298:Putative neutral zinc metallopeptidase	-	1489	993	1874	1460	507	719	891	756	553.088	277.1	462.93	340.6	163.676	218.654	230.535	236.591
gene:GYO_3483	18001.5	12557.7	14443.6	15675.5	19218.3	44048.6	34044.5	27498.5	-1.04051	0.000483308	0.00230397	ald	Chromosome	3220333	3221469	+	1137	protein_coding	- && PF05222:Alanine dehydrogenase/PNT, N-terminal domain|PF01262:Alanine dehydrogenase/PNT, C-terminal domain	-	13328	12774	16793	19306	16650	42168	39248	25963	2952.12	2125.61	2473.68	2685.68	3205.24	7646.83	6055.43	4845.07
gene:GYO_3249	567.273	308.683	496.274	462	554.041	1309.93	1156.27	1153.41	-1.18688	0.000484551	0.00230731	-	Chromosome	3008594	3009304	-	711	protein_coding	- && PF00005:ABC transporter	ABC_tran	420	314	577	569	480	1254	1333	1089	148.768	83.5558	135.919	126.58	147.767	363.653	328.889	324.985
gene:GYO_0080	1060.26	1398.9	895.358	863.104	609.445	684.212	588.111	618.54	0.754025	0.000485775	0.00231055	tilS	Chromosome	75005	76423	+	1419	protein_coding	- && PF11734:TilS substrate C-terminal domain|PF01171:PP-loop family	-	785	1423	1041	1063	528	655	678	584	139.321	189.731	122.869	118.488	81.4439	95.1739	83.8177	87.3244
gene:GYO_1259	212.052	817.912	265.769	321.533	69.2551	123.263	143.992	155.694	1.71568	0.000499554	0.00237344	-	Chromosome	1155980	1157341	-	1362	protein_coding	- && PF03553:Na+/H+ antiporter family	-	157	832	309	396	60	118	166	147	29.0303	115.575	37.9976	45.9875	9.64232	17.8634	21.3806	22.9005
Novel00514	149.922	93.3913	255.448	263.884	391.291	399.037	511.778	628.072	-1.33735	0.000502305	0.00238385	-	Chromosome	3208825	3209139	+	315	-	-	-	111	95	297	325	339	382	590	593	88.7446	57.0597	157.914	163.19	235.557	250.041	328.571	399.438
gene:GYO_4026	563.221	707.808	313.934	540.76	343.967	153.556	201.242	173.699	1.28534	0.00050319	0.00238539	-	Chromosome	3747893	3748282	+	390	protein_coding	- && -	-	417	720	365	666	298	147	232	164	269.278	349.289	156.748	270.104	167.247	77.7162	104.355	89.2246
gene:GYO_1929	958.961	1294.7	903.958	1131.86	1567.47	1663	1575.24	1936.11	-0.652013	0.000505344	0.00239294	rsgA	Chromosome	1756687	1757583	+	897	protein_coding	- && PF16745:RsgA N-terminal domain|PF03193:Protein of unknown function, DUF258	-	710	1317	1051	1394	1358	1592	1816	1828	199.34	277.786	196.239	245.806	331.371	365.94	355.15	432.403
gene:GYO_3378	615.896	249.699	634.749	491.231	776.811	1833.27	1289.85	1185.18	-1.35274	0.000508131	0.00240346	-	Chromosome	3118866	3119387	-	522	protein_coding	- && PF00583:Acetyltransferase (GNAT) family	Acetyltransf_1	456	254	738	605	673	1755	1487	1119	220.001	92.0619	236.789	183.319	282.197	693.211	499.722	454.847
gene:GYO_1805	1276.36	259.53	373.281	474.18	160.441	188.028	126.643	222.42	1.7718	0.000520442	0.00245808	-	Chromosome	1639312	1639578	+	267	protein_coding	- && PF05256:Uncharacterised protein family (UPF0223)	-	945	264	434	584	139	180	146	210	891.353	187.072	272.241	345.958	113.949	139.002	95.9246	166.883
gene:GYO_4330	12131.5	4283.22	6577.14	8648.09	37963.3	14678.7	18440.5	18111.3	-1.49524	0.000520833	0.00245808	-	Chromosome	4015171	4022178	-	7008	protein_coding	- && PF05593:RHS Repeat	-	8982	4357	7647	10651	32890	14052	21259	17100	322.781	117.628	182.756	240.391	1027.25	413.431	532.154	517.735
gene:GYO_0404	702.338	3464.33	873.855	1459.89	582.897	563.038	354.775	282.791	1.86611	0.000522969	0.0024652	glpT	Chromosome	342607	343941	-	1335	protein_coding	- && PF07690:Major Facilitator Superfamily	MFS_1	520	3524	1016	1798	505	539	409	267	98.096	499.426	127.464	213.025	82.7975	83.2466	53.744	42.4361
Novel00648	5.4026	6.88147	0.860094	4.05976	90.0316	18.8028	12.1439	13.7689	-2.98523	0.000523501	0.0024652	-	Chromosome	4065791	4067034	+	1244	-	PF01261:Xylose isomerase-like TIM barrel|PF01116:Fructose-bisphosphate aldolase class-II	F_bP_aldolase	4	7	1	5	78	18	14	13	0.809784	1.06462	0.134634	0.635728	13.724	2.9834	1.97422	2.21732
gene:GYO_1034	110.753	133.697	57.6263	59.2725	47.3243	35.5163	22.5529	24.3603	1.47918	0.000529685	0.00249157	-	Chromosome	954292	954447	-	156	protein_coding	- && -	-	82	136	67	73	41	34	26	23	132.379	164.942	71.9325	74.015	57.5263	44.938	29.2373	31.283
gene:GYO_1008	58.0779	73.73	46.4451	38.1617	26.5478	19.8474	27.7575	20.1237	1.18981	0.000532308	0.00250114	-	Chromosome	931258	932388	+	1131	protein_coding	- && PF00271:Helicase conserved C-terminal domain|PF00270:DEAD/DEAH box helicase	DEAD	43	75	54	47	23	19	32	19	9.57492	12.5463	7.99661	6.5729	4.45115	3.46378	4.96336	3.56448
gene:GYO_2653	4480.11	3256.9	4406.26	4212.4	5944.39	6366.83	5556.7	6595.28	-0.580857	0.000535322	0.00251253	-	Chromosome	2471600	2472694	-	1095	protein_coding	- && PF02812:Glu/Leu/Phe/Val dehydrogenase, dimerisation domain|PF00208:Glutamate/Leucine/Phenylalanine/Valine dehydrogenase	-	3317	3313	5123	5188	5150	6095	6406	6227	762.888	572.432	783.583	749.389	1029.44	1147.67	1026.27	1206.62
Novel00273	59573.1	64298.5	40820	54080.8	37471.6	25560.3	26121.5	34667.9	0.821175	0.000541507	0.00253876	-	Chromosome	1842550	1842749	+	200	-	PF00312:Ribosomal protein S15	-	44107	65406	47460	66606	32464	24469	30114	32732	55540.1	61873.4	39744.1	52675.1	35528.7	25225.8	26413.5	34725.4
gene:GYO_2364	2167.79	2268.92	1897.37	1517.54	1214.27	1257.7	1374.86	1150.23	0.651283	0.000542429	0.00254029	-	Chromosome	2232813	2234213	-	1401	protein_coding	- && PF03572:Peptidase family S41|PF01471:Putative peptidoglycan binding domain|PF00595:PDZ domain (Also known as DHR or GLGF)	Peptidase_S41	1605	2308	2206	1869	1052	1204	1585	1086	288.514	311.684	263.72	211.005	164.356	177.193	198.463	164.474
gene:GYO_4317	557.818	277.225	464.451	480.675	786.045	849.258	798.027	803.89	-0.863725	0.00054351	0.00254255	licT	Chromosome	4005848	4006681	-	834	protein_coding	- && PF00874:PRD domain|PF03123:CAT RNA binding domain	PRD	413	282	540	592	681	813	920	759	124.713	63.9734	108.443	112.274	178.726	200.994	193.513	193.099
gene:GYO_3994	32.4156	67.8316	70.5277	70.6398	113.117	134.753	116.234	123.92	-1.0007	0.000546846	0.00255535	-	Chromosome	3711285	3711626	-	342	protein_coding	- && PF00436:Single-strand binding protein family	-	24	69	82	87	98	129	134	117	17.6732	38.1715	40.1571	40.236	62.7202	77.7719	68.7333	72.588
gene:GYO_4381	280.935	167.121	107.512	211.107	533.264	473.203	325.283	405.652	-1.18313	0.000549352	0.00256424	-	Chromosome	4073695	4074672	-	978	protein_coding	- && PF00294:pfkB family carbohydrate kinase	PfkB	208	170	125	260	462	453	375	383	53.5616	32.8872	21.4065	42.0491	103.398	95.5033	67.2637	83.0931
gene:GYO_0020	249.87	464.008	198.682	211.107	150.053	129.53	98.0185	106.973	1.21443	0.000556543	0.00259497	-	Chromosome	23219	23842	-	624	protein_coding	- && PF01712:Deoxynucleoside kinase	-	185	472	231	260	130	124	113	101	74.6649	143.111	62.0015	65.9038	45.6001	40.9728	31.7674	34.3433
gene:GYO_0027	351.169	314.581	242.546	255.765	188.143	106.549	139.655	181.113	0.918714	0.000561716	0.00261622	-	Chromosome	29554	29778	+	225	protein_coding	- && PF10704:Protein of unknown function (DUF2508)	-	260	320	282	315	163	102	161	171	291.018	269.082	209.914	221.437	158.567	93.4709	125.525	161.257
gene:GYO_2634	3896.62	2524.52	3531.54	2980.67	1396.64	2055.77	2163.35	1749.7	0.811873	0.000570166	0.00265267	-	Chromosome	2452871	2453698	+	828	protein_coding	- && PF02096:60Kd inner membrane protein	-	2885	2568	4106	3671	1210	1968	2494	1652	877.495	586.788	830.546	701.255	319.862	490.065	528.39	423.336
gene:GYO_3031	162.078	295.903	126.434	219.227	109.654	66.8543	82.4049	97.4412	1.1753	0.00057085	0.00265296	-	Chromosome	2797505	2797948	-	444	protein_coding	- && PF01842:ACT domain	ACT	120	301	147	270	95	64	95	92	68.0656	128.263	55.451	96.1839	46.8326	29.7205	37.5343	43.9653
gene:GYO_1060	113.455	94.3744	418.866	352.387	521.722	1062.36	1190.1	779.529	-1.85811	0.000589361	0.002736	-	Chromosome	978678	979472	+	795	protein_coding	- && PF14167:YfkD-like protein	-	84	96	487	434	452	1017	1372	736	26.6098	22.8466	102.598	86.3464	124.445	263.762	302.744	196.434
gene:GYO_4116	3985.77	42.2719	926.321	1033.61	7122.88	11533.4	14636.9	16757.8	-3.06348	0.000592062	0.00274554	-	Chromosome	3823374	3823505	+	132	protein_coding	- && PF11420:Bacteriocin subtilosin A	-	2951	43	1077	1273	6171	11041	16874	15822	5630.21	61.6327	1366.52	1525.37	10232.7	17246.2	22425	25432.7
gene:GYO_1669	87.7922	164.172	317.375	207.86	70.4093	60.5867	84.1398	81.554	1.39196	0.000605849	0.00280642	-	Chromosome	1519366	1520343	+	978	protein_coding	- && PF03741:Integral membrane protein TerC family	-	65	167	369	256	61	58	97	77	16.738	32.3068	63.1921	41.4021	13.6521	12.2278	17.3989	16.7054
gene:GYO_4320	131.013	67.8316	157.397	110.425	281.637	280.997	258.491	178.995	-1.09995	0.000607362	0.00280806	-	Chromosome	4007663	4008949	+	1287	protein_coding	- && PF11700:Vacuole effluxer Atg22 like	-	97	69	183	136	244	269	298	169	18.9812	10.1435	23.8148	16.7141	41.4972	43.0956	40.6187	27.8621
gene:GYO_0432	9.45455	0.983067	6.88075	7.30756	33.4733	22.9812	26.89	13.7689	-1.99732	0.000607522	0.00280806	-	Chromosome	366416	367660	-	1245	protein_coding	- && PF00375:Sodium:dicarboxylate symporter family	SDF	7	1	8	9	29	22	31	13	1.41598	0.151966	1.07621	1.14339	5.09842	3.64345	4.36798	2.21554
gene:GYO_4118	360.624	63.8993	413.705	302.046	1079.22	886.864	767.667	1064.44	-1.73601	0.000610568	0.0028141	-	Chromosome	3824996	3825157	+	162	protein_coding	- && -	-	267	65	481	372	935	849	885	1005	415.074	75.9128	497.285	363.203	1263.29	1080.57	958.333	1316.3
gene:GYO_2358	59.4286	80.6115	69.6676	61.7083	19.6223	43.8731	35.5642	22.242	1.15631	0.000610787	0.0028141	-	Chromosome	2228248	2228586	-	339	protein_coding	- && PF01638:HxlR-like helix-turn-helix	DUF24	44	82	81	76	17	42	41	21	32.6875	45.7647	40.0185	35.4597	10.9763	25.5452	21.2164	13.1439
gene:GYO_1691	131.013	81.5945	92.8901	128.288	216.999	202.652	157.003	290.205	-1.00004	0.000610812	0.0028141	spo0E	Chromosome	1539424	1539681	+	258	protein_coding	- && PF09388:Spo0E like sporulation regulatory protein	-	97	83	108	158	188	194	181	274	94.6851	60.866	70.1098	96.8633	159.494	155.039	123.069	225.339
gene:GYO_0693	1187.22	457.126	2253.45	2366.03	3321.93	5116.44	6812.72	5578.51	-1.73333	0.000632872	0.00291258	rsbW	Chromosome	639173	639655	+	483	protein_coding	- && PF13581:Histidine kinase-like ATPase domain	-	879	465	2620	2914	2878	4898	7854	5267	458.322	182.147	908.509	954.254	1304.22	2090.89	2852.54	2313.78
gene:GYO_0183	526.753	206.444	335.437	297.174	700.63	921.336	736.44	603.712	-1.11917	0.000640438	0.00294421	-	Chromosome	159289	159885	+	597	protein_coding	- && PF14089:KinB-signalling pathway activation in sporulation	-	390	210	390	366	607	882	849	570	164.52	66.5521	109.412	96.968	222.547	304.616	249.472	202.584
Novel00561	12.1558	13.7629	22.3624	16.239	115.425	28.2042	44.2384	40.2474	-1.80795	0.000641226	0.00294466	-	Chromosome	3563866	3565396	+	1531	-	PF04020:Mycobacterial 4 TMS phage holin, superfamily IV|PF13349:Putative adhesin|PF04024:PspC domain	PspC	9	14	26	20	100	27	51	38	1.48046	1.73009	2.84429	2.06622	14.2966	3.6362	5.84364	5.2664
gene:GYO_3944	1027.84	866.082	739.681	749.431	488.248	622.581	514.38	408.829	0.732721	0.000643557	0.00295218	-	Chromosome	3665792	3666652	+	861	protein_coding	- && PF08282:haloacid dehalogenase-like hydrolase	Hydrolase_3	761	881	860	923	423	596	593	386	222.593	193.593	167.29	169.559	107.534	142.726	120.82	95.1239
gene:GYO_2652	3564.37	2517.63	3145.36	3478.4	6564.23	5080.93	4081.21	6084.78	-0.779559	0.000651434	0.00298258	buk	Chromosome	2470490	2471581	-	1092	protein_coding	- && PF00871:Acetokinase family	-	2639	2561	3657	4284	5687	4864	4705	5745	608.62	443.714	560.889	620.51	1139.9	918.396	755.832	1116.28
sRNA00080	22.961	58.0009	28.3831	41.4095	295.488	75.2111	110.162	75.1992	-1.87764	0.000651999	0.00298258	-	Chromosome	2972974	2973061	-	88	-	PF01479:S4 domain	S4	17	59	33	51	256	72	127	71	48.6514	126.849	62.8067	91.6662	636.743	168.698	253.168	171.191
gene:GYO_3331	1735.59	287.056	3369.85	1852.06	5212.6	8239.79	8720.18	7624.77	-2.04015	0.000652287	0.00298258	-	Chromosome	3083909	3084829	-	921	protein_coding	- && PF01297:Zinc-uptake complex component A periplasmic	-	1285	292	3918	2281	4516	7888	10053	7199	351.377	59.9846	712.492	391.731	1073.25	1765.9	1914.8	1658.51
gene:GYO_3035	12684	13376.6	6534.13	11315.4	4365.38	5906.16	5900.19	6311.43	0.965635	0.000654843	0.00299106	rpmA	Chromosome	2800226	2800510	-	285	protein_coding	- && PF01016:Ribosomal L27 protein	-	9391	13607	7597	13936	3782	5654	6802	5959	8298.44	9033.04	4464.49	7734.19	2904.58	4090.44	4186.78	4436.43
gene:GYO_2645	67.5325	39.3227	216.744	207.048	340.504	428.285	570.763	600.534	-1.86717	0.000667172	0.00304411	-	Chromosome	2462623	2463507	+	885	protein_coding	- && PF00781:Diacylglycerol kinase catalytic domain	-	50	40	252	255	295	410	658	567	14.2284	8.55132	47.6905	45.5742	72.9602	95.5212	130.428	135.939
gene:GYO_2583	2.7013	7.86453	5.16056	10.5554	0	1.0446	0	0	4.42208	0.000673873	0.00307049	-	Chromosome	2411798	2411914	-	117	protein_coding	- && -	-	2	8	6	13	0	1	0	0	4.305	12.9366	8.58896	17.5743	0	1.76227	0	0
gene:GYO_0920	101.299	18.6783	220.184	211.107	361.281	630.937	920.333	615.362	-2.19561	0.000674397	0.00307049	-	Chromosome	835531	837108	-	1578	protein_coding	- && PF01645:Conserved region in glutamate synthase	-	75	19	256	260	313	604	1061	581	11.9697	2.27805	27.1711	26.0608	43.4155	78.9203	117.95	78.1222
gene:GYO_3212	4.05195	33.4243	17.2019	21.1107	229.696	54.3191	55.5149	54.0163	-2.36357	0.000682002	0.0031018	-	Chromosome	2972504	2972653	-	150	protein_coding	- && -	-	3	34	20	26	199	52	64	51	5.03685	42.8849	22.3313	27.416	290.382	71.4778	74.8474	72.1413
gene:GYO_1673	332.26	498.415	428.327	438.454	228.542	290.398	283.646	202.296	0.756836	0.00068883	0.00312951	-	Chromosome	1522842	1523543	-	702	protein_coding	- && PF08876:Domain of unknown function (DUF1836)	-	246	507	498	540	198	278	327	191	88.2526	136.643	118.814	121.669	61.7355	81.652	81.7144	57.73
gene:GYO_0351	228.26	270.343	225.345	348.327	70.4093	161.913	103.223	154.635	1.13002	0.000695876	0.00315815	-	Chromosome	294350	295096	-	747	protein_coding	- && PF00756:Putative esterase	-	169	275	262	429	61	155	119	146	56.9765	69.6512	58.7429	90.8361	17.8738	42.7829	27.9457	41.4703
gene:GYO_3977	222.857	126.816	268.349	229.782	513.642	339.494	366.051	628.072	-1.12272	0.000698197	0.00316531	-	Chromosome	3695893	3696396	-	504	protein_coding	- && -	-	165	129	312	283	445	325	422	593	82.4485	48.4257	103.681	88.8132	193.258	132.957	146.883	249.649
gene:GYO_4400	52.6753	9.83067	169.438	132.348	255.09	563.038	800.629	362.227	-2.44064	0.000701008	0.00317467	-	Chromosome	4093981	4095051	+	1071	protein_coding	- && PF00106:short chain dehydrogenase	adh_short	39	10	197	163	221	539	923	342	9.17074	1.76655	30.8072	24.0724	45.1658	103.767	151.182	67.7551
gene:GYO_1918	779.325	1184.6	588.304	605.716	368.206	401.126	445.854	409.888	0.957763	0.000701773	0.00317476	rpoZ	Chromosome	1746151	1746354	+	204	protein_coding	- && PF01192:RNA polymerase Rpb6	-	577	1205	684	746	319	384	514	387	712.32	1117.57	561.566	578.403	342.269	388.115	441.999	402.519
gene:GYO_2502	992.728	1857.01	989.968	1118.06	734.104	681.078	628.88	523.217	0.949693	0.000720342	0.0032553	hepT	Chromosome	2348476	2349438	-	963	protein_coding	- && PF00348:Polyprenyl synthetase	-	735	1889	1151	1377	636	652	725	494	192.216	371.127	200.182	226.167	144.557	139.598	132.069	108.844
gene:GYO_4380	526.753	273.293	205.562	310.977	964.954	884.775	565.558	625.954	-1.21001	0.000725765	0.00327633	-	Chromosome	4071749	4073662	-	1914	protein_coding	- && PF00205:Thiamine pyrophosphate enzyme, central domain|PF02775:Thiamine pyrophosphate enzyme, C-terminal TPP binding domain|PF02776:Thiamine pyrophosphate enzyme, N-terminal TPP binding domain	TPP_enzyme_N	390	278	239	383	836	847	652	591	51.3159	27.4802	20.9137	31.6504	95.603	91.2432	59.7577	65.5165
gene:GYO_2119	163.429	65.8655	82.569	83.631	212.382	165.047	239.408	297.619	-1.21751	0.00073015	0.00329264	-	Chromosome	1997823	1999229	+	1407	protein_coding	- && PF00083:Sugar (and other) transporter	Sugar_tr	121	67	96	103	184	158	276	281	21.6581	9.00943	11.4275	11.5788	28.624	23.1538	34.4115	42.3758
gene:GYO_3258	22.961	14.746	26.6629	34.9139	47.3243	68.9435	50.3104	58.2529	-1.16667	0.000732798	0.00330108	-	Chromosome	3016530	3017771	-	1242	protein_coding	- && PF02894:Oxidoreductase family, C-terminal alpha/beta domain|PF01408:Oxidoreductase family, NAD-binding Rossmann fold	GFO_IDH_MocA_C	17	15	31	43	41	66	58	55	3.44712	2.285	4.18037	5.47606	7.22553	10.9567	8.19209	9.39607
gene:GYO_4379	156.675	98.3067	86.0094	124.229	436.307	302.933	181.291	193.823	-1.26235	0.000745608	0.00335524	-	Chromosome	4070839	4071732	-	894	protein_coding	- && PF01261:Xylose isomerase-like TIM barrel	-	116	100	100	153	378	290	209	183	32.6776	21.1631	18.7343	27.0692	92.5468	66.8836	41.0107	43.4329
gene:GYO_3936	3866.91	5549.41	5045.31	4788.08	3323.09	2202.01	2419.24	3331.01	0.7719	0.000760982	0.0034208	tarL	Chromosome	3653328	3655199	+	1872	protein_coding	- && PF04464:CDP-Glycerol:Poly(glycerophosphate) glycerophosphotransferase	-	2863	5645	5866	5897	2879	2108	2789	3145	385.163	570.525	524.821	498.25	336.622	232.179	261.355	356.468
gene:GYO_3626	787.429	878.862	627.008	581.357	354.355	492.006	415.494	457.55	0.740349	0.000762098	0.00342221	-	Chromosome	3352437	3353228	+	792	protein_coding	- && PF00106:short chain dehydrogenase	adh_short	583	894	729	716	307	471	479	432	185.384	213.564	154.162	142.991	84.8439	122.618	106.096	115.735
gene:GYO_2722	52002.7	28028.2	33173.8	34810.8	69338.2	68904.8	54420.2	72601.1	-0.841707	0.00078111	0.00350388	tasA	Chromosome	2533748	2534533	-	786	protein_coding	- && PF12389:Camelysin metallo-endopeptidase	-	38502	28511	38570	42873	60072	65963	62738	68547	12336.4	6862.88	8218.68	8627.46	16728.5	17303.6	14002.2	18504.2
gene:GYO_2046	578.078	663.57	588.304	610.587	492.865	440.82	430.241	424.716	0.449624	0.000784375	0.00351426	pgsA	Chromosome	1866290	1866871	+	582	protein_coding	- && PF01066:CDP-alcohol phosphatidyltransferase	CDP-OH_P_transf	428	675	684	752	427	422	496	401	185.204	219.431	196.838	204.37	160.588	149.502	149.502	146.193
gene:GYO_1198	272525	98244.8	50550.3	10660.1	32357.1	13355.2	4429.92	8265.55	2.88673	0.000785074	0.00351426	-	Chromosome	1094366	1094569	-	204	protein_coding	- && PF00313:'Cold-shock' DNA-binding domain	CSD	201773	99937	58773	13129	28033	12785	5107	7804	249093	92685.7	48252.8	10179.4	30077.8	12922	4391.61	8116.94
gene:GYO_0919	284.987	152.375	147.076	175.381	473.243	448.133	295.79	335.748	-1.03514	0.000801483	0.00358394	-	Chromosome	835179	835493	+	315	protein_coding	- && PF01371:Trp repressor protein	Trp_repressor	211	155	171	216	410	429	341	317	168.695	93.0974	90.9202	108.459	284.892	280.806	189.903	213.528
gene:GYO_1909	705.039	113.053	1082.86	208.672	163.904	101.326	72.8633	119.683	2.20495	0.000804272	0.0035906	cysC	Chromosome	1736953	1737546	+	594	protein_coding	- && PF01583:Adenylylsulphate kinase	-	522	115	1259	257	142	97	84	113	221.316	36.6292	354.988	68.4334	52.325	33.6701	24.8074	40.3643
gene:GYO_3597	1094.03	921.134	900.518	983.273	171.983	577.663	412.892	488.265	1.23936	0.000805379	0.0035906	-	Chromosome	3326461	3327282	-	822	protein_coding	- && PF07673:Protein of unknown function (DUF1602)|PF00005:ABC transporter	ABC_tran	810	937	1047	1211	149	553	476	461	248.166	215.667	213.329	233.02	39.6754	138.711	101.584	118.997
gene:GYO_2020	1923.33	2109.66	2065.08	2399.32	3244.6	2656.41	2945.76	2998.43	-0.47868	0.000805503	0.0035906	-	Chromosome	1839740	1840018	+	279	protein_coding	- && PF04456:Protein of unknown function (DUF503)	-	1424	2146	2401	2955	2811	2543	3396	2831	1285.39	1455.26	1441.33	1675.23	2205.28	1879.32	2135.26	2152.98
gene:GYO_3180	761.767	1072.53	686.355	783.533	510.179	522.299	547.342	397.179	0.740683	0.000816472	0.00363569	-	Chromosome	2944038	2944979	-	942	protein_coding	- && PF02272:DHHA1 domain|PF01368:DHH family	-	564	1091	798	965	442	500	631	375	150.785	219.124	141.882	162.031	102.702	109.44	117.508	84.4667
gene:GYO_3206	575.377	1771.49	659.692	887.463	458.238	325.915	345.233	421.539	1.32861	0.000830046	0.00369228	-	Chromosome	2965261	2966601	+	1341	protein_coding	- && PF05525:Branched-chain amino acid transport protein	-	426	1802	767	1093	397	312	398	398	80.0037	254.239	95.7947	128.918	64.7991	47.9717	52.0646	62.9738
gene:GYO_1040	87.7922	26.5428	184.06	209.483	294.334	613.179	887.371	350.576	-2.07693	0.000838078	0.00372411	-	Chromosome	959992	961407	+	1416	protein_coding	- && PF01235:Sodium:alanine symporter family	-	65	27	214	258	255	587	1023	331	11.5606	3.60759	25.3119	28.819	39.4171	85.474	126.736	49.5987
gene:GYO_4027	214.753	161.223	158.257	212.731	117.734	119.084	107.56	120.742	0.682206	0.000843303	0.00374342	-	Chromosome	3748317	3748958	-	642	protein_coding	- && PF13460:NAD(P)H-binding	-	159	164	184	262	102	114	124	114	62.3723	48.331	48.0018	64.5488	34.7754	36.6124	33.8825	37.6769
gene:GYO_2343	745.559	389.294	444.668	403.54	810.284	1082.2	1023.56	862.143	-0.932333	0.000847267	0.0037571	-	Chromosome	2216440	2217675	-	1236	protein_coding	- && PF01476:LysM domain|PF00877:NlpC/P60 family	LysM	552	396	517	497	702	1036	1180	814	112.473	60.6168	70.0563	63.6004	124.316	172.822	167.476	139.737
gene:GYO_3296	305.247	856.251	158.257	198.928	94.6486	123.263	124.909	91.0863	1.80658	0.000849738	0.00376414	-	Chromosome	3056791	3057669	-	879	protein_coding	- && PF00005:ABC transporter	ABC_tran	226	871	184	245	82	118	144	86	64.7514	187.476	35.0594	44.0858	20.4189	27.6791	28.7383	20.7594
gene:GYO_2816	2219.12	3513.48	3627.02	3627.8	1157.71	1951.31	1871.89	1923.4	0.911632	0.000850684	0.00376441	grpE	Chromosome	2608986	2609549	-	564	protein_coding	- && PF01025:GrpE	-	1643	3574	4217	4468	1003	1868	2158	1816	733.648	1198.92	1252.27	1253.01	389.25	682.899	671.213	683.191
Novel00299	4.05195	56.0348	84.2892	41.4095	165.058	178.626	210.783	262.668	-2.12912	0.000861388	0.00380782	-	Chromosome	1975028	1976444	-	1417	-	PF00268:Ribonucleotide reductase, small chain	-	3	57	98	51	143	171	243	248	0.533189	7.61065	11.5833	5.69275	22.0889	24.882	30.0832	37.1353
gene:GYO_2116	35.1169	34.4073	40.4244	56.8366	58.8668	102.371	97.1511	84.7315	-1.03354	0.000862333	0.00380804	-	Chromosome	1995549	1996256	+	708	protein_coding	- && PF00457:Glycosyl hydrolases family 11	-	26	35	47	70	51	98	112	80	9.24846	9.35301	11.1183	15.6382	15.7668	28.5399	27.7506	23.9752
gene:GYO_2654	1430.34	1448.06	1253.16	1506.17	2006.09	1862.52	1807.7	1831.26	-0.413179	0.000865155	0.00381654	ptb	Chromosome	2472706	2473605	-	900	protein_coding	- && PF01515:Phosphate acetyl/butaryl transferase	-	1059	1473	1457	1855	1738	1783	2084	1729	296.335	309.654	271.139	326.004	422.683	408.477	406.203	407.622
gene:GYO_2152	3174.03	1927.79	1709.01	1627.15	1037.67	1270.23	1169.28	948.992	0.930188	0.000878925	0.00387327	lexA	Chromosome	2020904	2021521	-	618	protein_coding	- && PF00717:Peptidase S24-like|PF01726:LexA DNA binding domain	LexA_DNA_bind	2350	1961	1987	2004	899	1216	1348	896	957.654	600.352	538.498	512.898	318.404	405.699	382.639	307.627
gene:GYO_1019	646.961	57.0179	1119.84	995.452	2550.9	3561.04	5019.76	2840.62	-2.30901	0.000881099	0.00387884	-	Chromosome	942602	942949	+	348	protein_coding	- && PF11181:Heat induced stress protein YflT	-	479	58	1302	1226	2210	3409	5787	2682	346.646	31.533	626.624	557.228	1390.02	2019.79	2917.17	1635.25
gene:GYO_4010	174.234	164.172	225.345	183.501	371.669	323.825	346.101	231.952	-0.767498	0.000884566	0.0038893	-	Chromosome	3731702	3733108	-	1407	protein_coding	- && PF13229:Right handed beta helix region	-	129	167	262	226	322	310	399	219	23.0901	22.4563	31.1876	25.406	50.0921	45.4283	49.747	33.0259
gene:GYO_0354	5325.61	4104.3	4936.08	7110.26	1591.71	3746.97	2307.34	2547.24	1.07512	0.000886054	0.0038893	feuA	Chromosome	297119	298072	-	954	protein_coding	- && PF01497:Periplasmic binding protein	Peripla_BP_2	3943	4175	5739	8757	1379	3587	2660	2405	1040.9	827.989	1007.54	1451.87	316.39	775.25	489.127	534.899
gene:GYO_3627	353.87	297.869	689.795	816.823	812.593	1713.14	1763.47	1424.55	-1.40367	0.000886216	0.0038893	-	Chromosome	3353266	3354144	-	879	protein_coding	- && PF08450:SMP-30/Gluconolaconase/LRE-like region	-	262	303	802	1006	704	1640	2033	1345	75.0657	65.2184	152.813	181.022	175.304	384.693	405.73	324.667
gene:GYO_1537	13714.5	10375.3	13368.4	12925.5	6668.11	9591.5	7740.86	8556.82	0.629945	0.000888979	0.00389741	-	Chromosome	1404125	1405303	+	1179	protein_coding	- && PF07992:Pyridine nucleotide-disulphide oxidoreductase	Pyr_redox_2	10154	10554	15543	15919	5777	9182	8924	8079	2168.97	1693.63	2207.98	2135.62	1072.5	1605.77	1327.8	1453.95
gene:GYO_2951	68.8831	85.5268	87.7296	75.5115	38.0903	32.3825	32.962	59.312	0.971345	0.00089287	0.00390662	-	Chromosome	2720099	2722015	+	1917	protein_coding	- && PF01757:Acyltransferase family	-	51	87	102	93	33	31	38	56	6.70004	8.58645	8.91155	7.67331	3.7679	3.33425	3.47736	6.19828
gene:GYO_3237	128.312	128.782	114.392	147.775	244.701	183.849	185.628	205.474	-0.655728	0.000892915	0.00390662	-	Chromosome	2995840	2996685	-	846	protein_coding	- && PF00753:Metallo-beta-lactamase superfamily	Lactamase_B	95	131	133	182	212	176	214	194	28.2802	29.2966	26.3303	34.0269	54.8495	42.8945	44.3743	48.656
gene:GYO_2031	4060.05	4589.94	7436.37	5613.02	1588.25	3062.76	3095.82	2801.43	1.04064	0.000908532	0.00397086	asd	Chromosome	1849584	1850624	+	1041	protein_coding	- && PF01118:Semialdehyde dehydrogenase, NAD binding domain|PF02774:Semialdehyde dehydrogenase, dimerisation domain	-	3006	4669	8646	6913	1376	2932	3569	2645	727.223	848.574	1391.04	1050.36	289.318	580.727	601.429	539.114
gene:GYO_3408	9.45455	33.4243	28.3831	17.8629	87.7231	49.0961	48.5755	59.312	-1.4382	0.000911891	0.00398146	-	Chromosome	3149475	3151466	-	1992	protein_coding	- && PF00672:HAMP domain|PF00015:Methyl-accepting chemotaxis protein (MCP) signalling domain|PF02203:Tar ligand binding domain homologue|PF02743:Cache domain	Cache_1	7	34	33	22	76	47	56	56	0.884989	3.22928	2.77459	1.74685	8.35087	4.86483	4.93159	5.96491
gene:GYO_3821	120.208	140.579	128.154	141.28	358.972	177.582	199.507	292.324	-0.952831	0.000940372	0.0041016	-	Chromosome	3537097	3539019	-	1923	protein_coding	- && -	-	89	143	149	174	311	170	230	276	11.6557	14.0693	12.9772	14.3117	35.3988	18.2276	20.9815	30.4534
gene:GYO_2462	4365.3	7202.93	4530.97	5215.98	3610.5	3031.42	2868.56	3227.21	0.742915	0.000950752	0.00414263	asnS	Chromosome	2312768	2314060	-	1293	protein_coding	- && PF00152:tRNA synthetases class II (D, K and N)|PF01336:OB-fold nucleic acid binding domain	tRNA-synt_2	3232	7327	5268	6424	3128	2902	3307	3047	629.509	1072.12	682.374	785.83	529.512	462.762	448.667	500.011
gene:GYO_0401	6.75325	9.83067	50.7455	66.58	68.1008	176.537	365.184	151.457	-2.4981	0.000978881	0.00426083	-	Chromosome	339331	339591	-	261	protein_coding	- && -	-	5	10	59	82	59	169	421	143	4.82457	7.24897	37.8605	49.693	49.4787	133.507	282.963	116.252
gene:GYO_3974	58.0779	32.4412	50.7455	36.5378	88.8773	115.95	125.776	60.3712	-1.14703	0.000982044	0.00427023	-	Chromosome	3693724	3694590	+	867	protein_coding	- && PF12833:Helix-turn-helix domain	-	43	33	59	45	77	111	145	57	12.4905	7.20131	11.3975	8.20947	19.4392	26.3975	29.3384	13.9496
gene:GYO_3416	106.701	57.0179	120.413	82.0071	26.5478	44.9177	46.8407	46.6023	1.14505	0.00098575	0.00428198	-	Chromosome	3158172	3159464	-	1293	protein_coding	- && PF01595:Domain of unknown function DUF21|PF03471:Transporter associated domain|PF00571:CBS domain	CBS	79	58	140	101	23	43	54	44	15.3871	8.48684	18.1345	12.3551	3.89347	6.85692	7.32628	7.22037
gene:GYO_0349	1150.75	1444.13	1051.03	1373.82	813.747	779.27	955.03	773.175	0.59573	0.00099518	0.00431853	-	Chromosome	291834	293270	+	1437	protein_coding	- && PF01740:STAS domain|PF00916:Sulfate permease family	Sulfate_transp	852	1469	1222	1692	705	746	1101	730	149.318	193.411	142.426	186.237	107.384	107.039	134.406	107.788
gene:GYO_1950	6076.57	5154.22	3000.01	5741.31	3041.45	2745.2	2510.31	2649.98	0.867398	0.00101029	0.00437962	-	Chromosome	1777478	1777723	+	246	protein_coding	- && PF13083:KH domain	-	4499	5243	3488	7071	2635	2628	2894	2502	4605.86	4032.38	2374.74	4546.4	2344.51	2202.67	2063.72	2158.03
gene:GYO_4518	2697.25	4961.54	2016.06	2430.98	1508.61	1359.02	1655.04	1211.66	1.07791	0.00101751	0.00440645	-	Chromosome	4204822	4205448	-	627	protein_coding	- && PF14804:Jag N-terminus|PF13083:KH domain|PF01424:R3H domain	R3H	1997	5047	2344	2994	1307	1301	1908	1144	802.121	1522.94	626.131	755.277	456.263	427.828	533.825	387.136
gene:GYO_3478	1210.18	1343.85	2100.35	2263.72	4225.71	2486.14	3242.42	3902.94	-1.00171	0.00102716	0.00444372	-	Chromosome	3211934	3215578	-	3645	protein_coding	- && PF01580:FtsK/SpoIIIE family	-	896	1367	2442	2788	3661	2380	3738	3685	61.907	70.9557	112.208	120.981	219.841	134.629	179.899	214.509
gene:GYO_4233	151.273	304.751	96.3305	110.425	47.3243	69.9881	66.7914	67.7852	1.39356	0.00103252	0.00446238	-	Chromosome	3925847	3926227	+	381	protein_coding	- && PF00903:Glyoxalase/Bleomycin resistance protein/Dioxygenase superfamily	Glyoxalase	112	310	112	136	41	67	77	64	74.0325	153.941	49.2343	56.4593	23.5541	36.2584	35.4531	35.6419
gene:GYO_0628	237.714	176.952	214.163	244.397	166.212	65.8097	87.6095	66.726	1.17889	0.00103597	0.00447276	-	Chromosome	577225	577977	+	753	protein_coding	- && PF09339:IclR helix-turn-helix domain|PF01614:Bacterial transcriptional regulator	IclR	176	180	249	301	144	63	101	63	58.8636	45.2266	55.3834	63.2256	41.8576	17.2506	23.5296	17.7521
Novel00052	75.6364	38.3396	91.1699	66.58	656.769	190.117	130.113	110.151	-1.99946	0.00104043	0.00448745	-	Chromosome	426833	429359	-	2527	-	PF02342:TerD domain|PF14266:Putative component of 'biosynthetic module'|PF03741:Integral membrane protein TerC family	-	56	39	106	82	569	182	150	104	5.581	2.91995	7.02547	5.13252	49.2849	14.85	10.413	8.7324
gene:GYO_4013	33.7662	48.1703	98.9108	70.6398	16.1595	19.8474	22.5529	33.8926	1.45054	0.00104649	0.004509	-	Chromosome	3736224	3736793	-	570	protein_coding	- && PF00857:Isochorismatase family	Isochorismatase	25	49	115	87	14	19	26	32	11.0457	16.2644	33.7908	24.1416	5.37601	6.87286	8.00178	11.9119
gene:GYO_4039	214.753	232.004	150.516	153.459	283.946	424.107	318.343	303.974	-0.828945	0.0010654	0.00458173	-	Chromosome	3757866	3758999	-	1134	protein_coding	- && PF13424:Tetratricopeptide repeat	-	159	236	175	189	246	406	367	287	35.3113	39.3745	25.8464	26.3615	47.482	73.8196	56.7729	53.7
gene:GYO_0563	158.026	160.24	311.354	263.884	655.615	484.694	352.173	424.716	-1.09811	0.00106552	0.00458173	-	Chromosome	503370	514121	+	10752	protein_coding	- && PF13745:HxxPF-repeated domain|PF00668:Condensation domain|PF00550:Phosphopantetheine attachment site|PF00501:AMP-binding enzyme|PF13193:AMP-binding enzyme C-terminal domain	AMP-binding	117	163	362	325	568	464	406	401	2.74048	2.86824	5.6389	4.78097	11.5629	8.8979	6.62407	7.91335
gene:GYO_0085	276.883	361.769	239.966	284.183	208.919	160.868	185.628	158.871	0.703206	0.00106689	0.004583	-	Chromosome	80878	81771	+	894	protein_coding	- && PF13145:PPIC-type PPIASE domain	-	205	368	279	350	181	154	214	150	57.7492	77.8802	52.2687	61.923	44.3147	35.5175	41.9918	35.6007
gene:GYO_3189	64.8312	126.816	49.0253	77.1354	28.8563	27.1596	34.6968	42.3657	1.25501	0.00106812	0.00458364	argG	Chromosome	2950088	2951299	-	1212	protein_coding	- && PF00764:Arginosuccinate synthase	-	48	129	57	95	25	26	40	40	9.97397	20.1374	7.87675	12.3977	4.51486	4.42313	5.78956	7.00265
gene:GYO_1245	14.8571	71.7639	176.319	115.297	11.5425	27.1596	26.0226	20.1237	2.15711	0.0010722	0.00459651	-	Chromosome	1144105	1145004	-	900	protein_coding	- && PF01370:NAD dependent epimerase/dehydratase family	Epimerase	11	73	205	142	10	26	30	19	3.07808	15.3461	38.1493	24.9556	2.43201	5.95648	5.84746	4.47936
gene:GYO_2465	95.8961	111.087	110.092	99.0581	76.1806	62.6759	51.1778	63.5486	0.723082	0.00108329	0.00463938	-	Chromosome	2315900	2316070	-	171	protein_coding	- && PF14084:Protein of unknown function (DUF4264)	-	71	113	128	122	66	60	59	60	104.566	125.026	125.369	112.846	84.4802	72.3459	60.5263	74.4493
gene:GYO_3512	147.221	71.7639	75.6882	93.3744	54.2498	49.0961	40.7688	28.5969	1.16288	0.00108471	0.00464083	-	Chromosome	3250589	3250825	-	237	protein_coding	- && PF07293:Protein of unknown function (DUF1450)	-	109	73	88	115	47	47	47	27	115.826	58.2762	62.1884	76.7487	43.4067	40.8892	34.7887	24.1725
gene:GYO_2486	1076.47	1685.96	1476.78	1197.63	708.71	919.246	874.36	855.788	0.69529	0.00108582	0.00464088	-	Chromosome	2332886	2334157	-	1272	protein_coding	- && PF14559:Tetratricopeptide repeat|PF13432:Tetratricopeptide repeat|PF13429:Tetratricopeptide repeat	-	797	1715	1717	1475	614	880	1008	808	157.798	255.09	226.078	183.412	105.655	142.644	139.015	134.781
gene:GYO_1055	79.6883	78.6453	203.842	201.364	236.621	361.431	386.002	565.582	-1.45576	0.00114993	0.00490999	-	Chromosome	974349	974819	+	471	protein_coding	- && PF01451:Low molecular weight phosphotyrosine protein phosphatase	LMWPc	59	80	237	248	205	346	445	534	31.5472	32.1355	84.2757	83.2823	95.2665	151.466	165.74	240.561
gene:GYO_4121	306.598	76.6792	383.602	323.157	1067.68	759.423	564.691	798.594	-1.54895	0.00116752	0.00498009	-	Chromosome	3827142	3828326	+	1185	protein_coding	- && -	-	227	78	446	398	925	727	651	754	48.2433	12.4535	63.0364	53.1235	170.856	126.495	96.372	135.008
gene:GYO_1211	366.026	318.514	346.618	257.389	170.829	241.302	204.711	176.877	0.696218	0.00117566	0.0050098	-	Chromosome	1107829	1108491	+	663	protein_coding	- && PF13419:Haloacid dehalogenase-like hydrolase	-	271	324	403	317	148	231	236	167	102.94	92.4587	101.804	75.6254	48.8602	71.8385	62.4434	53.4451
gene:GYO_2898	205.299	151.392	96.3305	120.169	72.7178	47.0069	73.7307	79.4357	1.06474	0.0011904	0.00506752	-	Chromosome	2679258	2679998	+	741	protein_coding	- && PF00881:Nitroreductase family	Nitroreductase	152	154	112	148	63	45	85	75	51.66	39.3205	25.3148	31.5911	18.6093	12.5214	20.1228	21.4757
gene:GYO_0669	194.494	417.803	218.464	267.132	162.749	121.173	144.859	119.683	1.0026	0.0011944	0.00507949	-	Chromosome	619917	620843	+	927	protein_coding	- && PF00005:ABC transporter	ABC_tran	144	425	254	329	141	116	167	113	39.1212	86.7413	45.8912	56.1355	33.2925	25.801	31.6028	25.8645
gene:GYO_3275	54.026	25.5597	17.2019	21.9227	51.9413	96.103	75.4656	78.3766	-1.37364	0.00119947	0.00509594	-	Chromosome	3034523	3035557	+	1035	protein_coding	- && PF13377:Periplasmic binding protein-like domain|PF00356:Bacterial regulatory proteins, lacI family	LacI	40	26	20	27	45	92	87	74	9.73305	4.7528	3.23642	4.12615	9.51655	18.3276	14.7458	15.1704
Novel00071	0	2.9492	0	0.811951	55.4041	8.35679	4.3371	4.23657	-4.2322	0.00120096	0.00509719	-	Chromosome	616892	617461	-	570	-	PF00375:Sodium:dicarboxylate symporter family	SDF	0	3	0	1	48	8	5	4	0	0.995779	0	0.27749	18.432	2.89384	1.5388	1.48899
gene:GYO_0514	104	213.326	330.276	203.8	40.3988	76.2557	104.09	97.4412	1.41976	0.00120805	0.00512216	-	Chromosome	448149	448910	+	762	protein_coding	- && PF08892:YqcI/YcgG family	-	77	217	384	251	35	73	120	92	25.4487	53.8792	84.4017	52.1003	10.0536	19.7527	27.6258	25.6176
gene:GYO_1133	1226.39	1574.87	1303.04	1207.37	1045.75	828.366	765.932	889.68	0.590252	0.00121081	0.00512876	-	Chromosome	1048577	1049329	+	753	protein_coding	- && PF00106:short chain dehydrogenase	adh_short	908	1602	1515	1487	906	793	883	840	303.683	402.517	336.971	312.347	263.354	217.139	205.709	236.695
gene:GYO_4473	68.8831	84.5437	57.6263	43.8454	25.3935	10.446	32.962	30.7152	1.34908	0.00121457	0.00513957	-	Chromosome	4167112	4167489	-	378	protein_coding	- && PF01638:HxlR-like helix-turn-helix	DUF24	51	86	67	54	22	10	38	29	33.9788	43.045	29.6864	22.5956	12.7391	5.45465	17.6352	16.2784
gene:GYO_1675	78.3377	192.681	107.512	104.742	69.2551	37.6055	48.5755	56.1346	1.19626	0.00122146	0.00516362	-	Chromosome	1524785	1526134	+	1350	protein_coding	- && PF02386:Cation transport protein	-	58	196	125	129	60	36	56	53	10.8199	27.4687	15.5078	15.1139	9.72803	5.49829	7.27683	8.33005
gene:GYO_3153	18.9091	90.4421	61.0667	64.1442	20.7765	19.8474	18.2158	22.242	1.5422	0.00122439	0.00517086	-	Chromosome	2916397	2916777	-	381	protein_coding	- && PF01638:HxlR-like helix-turn-helix	DUF24	14	92	71	79	18	19	21	21	9.25406	45.6856	31.211	32.7962	10.3408	10.2822	9.66902	11.695
gene:GYO_1233	90.4935	76.6792	129.014	186.749	147.744	395.903	401.616	310.329	-1.37592	0.00123264	0.00520053	-	Chromosome	1133083	1133952	+	870	protein_coding	- && PF00106:short chain dehydrogenase	adh_short	67	78	150	230	128	379	463	293	19.3948	16.9626	28.8767	41.8148	32.2031	89.8212	93.3577	71.4585
gene:GYO_2808	67346.1	31733.4	33444.7	45765.6	28267.6	19265.5	19851.8	21813.1	0.999131	0.00123484	0.00520468	-	Chromosome	2600926	2601372	-	447	protein_coding	- && PF09424:Yqey-like protein	-	49862	32280	38885	56365	24490	18443	22886	20595	28092.6	13662.9	14569.7	19944.5	11991.9	8507.13	8981.53	9775.96
gene:GYO_3218	182.338	151.392	147.936	152.647	323.19	325.915	202.109	233.012	-0.774553	0.00124486	0.0052417	-	Chromosome	2977744	2978388	+	645	protein_coding	- && PF00571:CBS domain	CBS	135	154	172	188	280	312	233	220	52.7113	45.1729	44.6626	46.102	95.0179	99.7364	63.3701	72.3716
gene:GYO_3572	117.507	39.3227	56.7662	39.7856	19.6223	15.669	31.2271	19.0646	1.54849	0.00124993	0.00525428	-	Chromosome	3308323	3308460	-	138	protein_coding	- && -	-	87	40	66	49	17	15	36	18	158.77	54.84	80.1013	56.1615	26.9635	22.4115	45.7627	27.6757
gene:GYO_1227	85.0909	44.238	195.241	114.485	215.845	367.699	440.65	246.78	-1.53126	0.00125031	0.00525428	-	Chromosome	1124801	1126327	-	1527	protein_coding	- && PF05552:Conserved TM helix	-	63	45	227	141	187	352	508	233	10.3904	5.57558	24.8978	14.605	26.8046	47.5294	58.3597	32.3759
gene:GYO_2209	66.1818	80.6115	55.9061	51.9649	140.819	83.5679	113.632	159.931	-0.970079	0.00127526	0.00535207	-	Chromosome	2103555	2104100	-	546	protein_coding	- && PF00589:Phage integrase family	Phage_integrase	49	82	65	64	122	80	131	151	22.6013	28.4144	19.9386	18.54	48.9074	30.2104	42.0888	58.6799
Novel00384	22.961	18.6783	22.3624	25.9824	120.042	75.2111	38.1665	32.8334	-1.55972	0.00127729	0.00535207	-	Chromosome	2545893	2546485	+	593	-	PF00753:Metallo-beta-lactamase superfamily	Lactamase_B	17	19	26	32	104	72	44	31	7.21977	6.06199	7.34334	8.53527	38.3871	25.0344	13.0163	11.0921
Novel00245	2.7013	3.93227	0	0.811951	39.2445	13.5798	10.409	4.23657	-3.23797	0.00127736	0.00535207	-	Chromosome	1667956	1668224	-	269	-	PF09678:Cytochrome c oxidase caa3 assembly factor (Caa3_CtaG)	-	2	4	0	1	34	13	12	4	1.87244	2.81335	0	0.587989	27.6652	9.96437	7.82559	3.1551
gene:GYO_3088	178.286	64.8824	108.372	106.366	243.547	309.201	194.302	238.307	-1.11107	0.00128052	0.00535703	-	Chromosome	2851021	2851464	-	444	protein_coding	- && PF03061:Thioesterase superfamily	4HBT	132	66	126	131	211	296	224	225	74.8722	28.124	47.5294	46.667	104.018	137.457	88.502	107.524
gene:GYO_2510	222.857	212.342	109.232	117.733	369.36	349.94	303.597	294.442	-0.997132	0.00128106	0.00535703	-	Chromosome	2354420	2355148	-	729	protein_coding	- && -	-	165	216	127	145	320	335	350	278	57.0014	56.0587	29.1777	31.4603	96.0793	94.7494	84.2226	80.9138
gene:GYO_2734	5.4026	0	3.44037	1.6239	5.77126	24.0258	20.8181	11.6506	-2.64434	0.00129573	0.00541307	comGB	Chromosome	2538650	2539687	-	1038	protein_coding	- && PF00482:Type II secretion system (T2SS), protein F	-	4	0	4	2	5	23	24	11	0.970492	0	0.645413	0.304757	1.05434	4.56867	4.05604	2.24854
gene:GYO_3306	3698.08	7670.87	3689.8	4764.53	3036.83	2173.81	2108.7	2630.91	0.994515	0.00131546	0.00549012	asnB	Chromosome	3064610	3066508	-	1899	protein_coding	- && PF00733:Asparagine synthase|PF13537:Glutamine amidotransferase domain	-	2738	7803	4290	5868	2631	2081	2431	2484	363.11	777.415	378.362	488.75	303.252	225.947	224.568	277.544
gene:GYO_3066	8307.85	12826.1	7340.04	7411.49	4777.45	5617.85	5665.99	4497.12	0.803621	0.00132414	0.00551609	clpX	Chromosome	2830709	2831971	-	1263	protein_coding	- && PF06689:ClpX C4-type zinc finger|PF10431:C-terminal, D2-small domain, of ClpB protein|PF07724:AAA domain (Cdc48 subfamily)	-	6151	13047	8534	9128	4139	5378	6532	4246	1226.51	1954.45	1131.68	1143.13	717.297	877.963	907.258	713.316
gene:GYO_0839	16.2078	34.4073	23.2225	24.3585	63.4838	48.0515	51.1778	42.3657	-1.04747	0.00132428	0.00551609	-	Chromosome	755563	755874	+	312	protein_coding	- && PF02302:PTS system, Lactose/Cellobiose specific IIB subunit	PTS_IIB	12	35	27	30	55	46	59	40	9.68626	21.2241	14.4939	15.2086	38.5847	30.3992	33.1731	27.2026
gene:GYO_1351	536.208	548.551	429.187	299.61	312.802	200.563	240.275	221.361	0.894551	0.00134546	0.00559886	-	Chromosome	1234743	1235366	+	624	protein_coding	- && PF09335:SNARE associated Golgi protein	-	397	558	499	369	271	192	277	209	160.227	169.187	133.934	93.5327	95.0587	63.4418	77.8724	71.0668
gene:GYO_4414	5768.63	3975.52	7242.85	7659.95	8945.45	22141.3	9339.52	18706.6	-1.26251	0.00135285	0.00562409	ahpF	Chromosome	4107279	4108808	+	1530	protein_coding	- && PF13192:Thioredoxin domain|PF07992:Pyridine nucleotide-disulphide oxidoreductase	Pyr_redox_2	4271	4044	8421	9434	7750	21196	10767	17662	703.02	500.076	921.822	975.273	1108.71	2856.42	1234.5	2449.37
gene:GYO_1956	497.039	1183.61	438.648	614.647	249.318	318.602	334.824	321.98	1.15835	0.00136764	0.00568006	-	Chromosome	1780120	1780968	+	849	protein_coding	- && PF01926:50S ribosome-binding GTPase	-	368	1204	510	757	216	305	386	304	109.162	268.309	100.609	141.029	55.6869	74.0715	79.7568	75.9751
gene:GYO_3292	1092.68	1110.87	416.285	627.638	447.849	229.812	376.46	302.915	1.25827	0.00137133	0.0056898	-	Chromosome	3052793	3054103	-	1311	protein_coding	- && PF12704:MacB-like periplasmic core domain|PF02687:FtsX-like permease family	-	809	1130	484	773	388	220	434	286	155.409	163.077	61.8326	93.2607	64.7793	34.6002	58.0731	46.288
gene:GYO_0973	10.8052	1.96613	8.60094	5.68366	20.7765	17.7582	20.8181	21.1829	-1.60767	0.00137921	0.00571694	-	Chromosome	895958	897298	+	1341	protein_coding	- && PF02056:Family 4 glycosyl hydrolase|PF11975:Family 4 glycosyl hydrolase C-terminal domain	-	8	2	10	7	18	17	24	20	1.50242	0.282174	1.24895	0.825641	2.93799	2.61384	3.13957	3.16451
gene:GYO_2755	279.585	447.295	259.748	362.13	219.308	190.117	183.026	198.06	0.772476	0.00138135	0.00572026	-	Chromosome	2554689	2555252	-	564	protein_coding	- && PF01812:5-formyltetrahydrofolate cyclo-ligase family	-	207	455	302	446	190	182	211	187	92.4316	152.633	89.6815	125.077	73.7364	66.5352	65.6284	70.3506
Novel00167	17.5584	2.9492	6.02066	7.30756	111.962	18.8028	22.5529	26.4786	-2.43711	0.00138822	0.00574308	-	Chromosome	1196255	1196740	+	486	-	PF03992:Antibiotic biosynthesis monooxygenase	ABM	13	3	7	9	97	18	26	25	6.73653	1.16789	2.41233	2.92906	43.686	7.63651	9.38481	10.9146
gene:GYO_1052	244.468	248.716	236.526	218.415	182.372	172.359	134.45	136.629	0.600911	0.00139968	0.00578488	-	Chromosome	972529	973716	-	1188	protein_coding	- && PF07690:Major Facilitator Superfamily	MFS_1	181	253	275	269	158	165	155	129	38.37	40.2922	38.7696	35.8144	29.1104	28.6369	22.8878	23.0398
gene:GYO_0605	56.7273	75.6961	68.8075	74.6995	35.7818	36.5609	48.5755	34.9517	0.823273	0.00141093	0.00582575	-	Chromosome	556408	557847	-	1440	protein_coding	- && PF00155:Aminotransferase class I and II|PF00392:Bacterial regulatory proteins, gntR family	Aminotran_1_2	42	77	80	92	31	35	56	33	7.34541	10.1168	9.3047	10.1053	4.71201	5.01146	6.82203	4.86247
gene:GYO_0549	344.416	514.144	375.861	358.071	285.1	239.213	253.287	224.538	0.669116	0.00141895	0.00585317	-	Chromosome	483308	483763	+	456	protein_coding	- && PF06271:RDD family	-	255	523	437	441	247	229	292	212	140.833	216.997	160.506	152.966	118.56	103.545	112.333	98.6453
gene:GYO_3424	262.026	571.162	273.51	414.095	232.004	164.002	179.556	169.463	1.03097	0.00142221	0.00585826	-	Chromosome	3164211	3165383	-	1173	protein_coding	- && PF00465:Iron-containing alcohol dehydrogenase	-	194	581	318	510	201	157	207	160	41.6517	93.7119	45.405	68.7692	37.5064	27.5969	30.9571	28.9419
gene:GYO_2466	1614.03	2132.27	1689.22	1469.63	1223.51	988.19	942.019	1252.97	0.648285	0.00142294	0.00585826	-	Chromosome	2316212	2319007	-	2796	protein_coding	- && PF13307:Helicase C-terminal domain|PF04851:Type III restriction enzyme, res subunit|PF00929:Exonuclease	Exonuc_X-T	1195	2169	1964	1810	1060	946	1086	1183	107.637	146.771	117.647	102.391	82.9805	69.761	68.1367	89.7745
gene:GYO_1340	660.468	780.555	325.976	481.487	1018.05	1546.01	1366.19	880.148	-1.09811	0.00142488	0.00585959	-	Chromosome	1225795	1227093	-	1299	protein_coding	- && PF11563:Protoglobin|PF00015:Methyl-accepting chemotaxis protein (MCP) signalling domain	-	489	794	379	593	882	1480	1575	831	94.8045	115.645	48.8658	72.205	148.616	234.915	212.696	135.737
gene:GYO_0840	10.8052	15.7291	13.7615	12.1793	36.936	49.0961	22.5529	24.3603	-1.32892	0.00142601	0.00585959	-	Chromosome	755874	756206	+	333	protein_coding	- && PF02255:PTS system, Lactose/Cellobiose specific IIA subunit	-	8	16	16	15	32	47	26	23	6.05028	9.09059	8.04731	7.12474	21.0336	29.1013	13.6967	14.6551
gene:GYO_2078	380.883	138.612	260.608	246.021	465.163	566.172	565.558	489.324	-1.02641	0.00144418	0.00592853	-	Chromosome	1962498	1963715	-	1218	protein_coding	- && PF00067:Cytochrome P450	p450	282	141	303	303	403	542	652	462	58.3084	21.9022	41.6649	39.3475	72.4211	91.751	93.905	80.4822
gene:GYO_3788	10293.3	8205.66	8360.97	7693.24	1897.59	5514.43	4743.06	3965.43	1.09982	0.00147255	0.00603917	clpP	Chromosome	3503250	3503846	+	597	protein_coding	- && PF00574:Clp protease	-	7621	8347	9721	9475	1644	5279	5468	3744	3214.9	2645.29	2727.17	2510.31	602.746	1823.21	1606.73	1330.66
gene:GYO_4078	124.26	127.799	112.672	126.664	63.4838	91.9246	80.6701	56.1346	0.746139	0.00148514	0.00608494	-	Chromosome	3785166	3785552	+	387	protein_coding	- && PF00903:Glyoxalase/Bleomycin resistance protein/Dioxygenase superfamily	Glyoxalase	92	130	131	156	55	88	93	53	59.8696	63.5549	56.6938	63.7581	31.1071	46.8846	42.1561	29.0583
gene:GYO_3509	968.416	1218.02	1137.04	939.428	398.217	739.576	664.444	657.728	0.792817	0.00149001	0.00609901	-	Chromosome	3247818	3248180	-	363	protein_coding	- && PF01521:Iron-sulphur cluster biosynthesis	-	717	1239	1322	1157	345	708	766	621	497.441	645.775	609.958	504.137	208.027	402.148	370.178	362.986
gene:GYO_2240	131.013	45.2211	61.0667	72.2637	105.037	247.57	247.215	190.646	-1.36094	0.00149751	0.00612383	yozQ	Chromosome	2134440	2134733	+	294	protein_coding	- && PF13217:Protein of unknown function (DUF4025)	-	97	46	71	89	91	237	285	180	83.091	29.6024	40.447	47.8811	67.7487	166.211	170.054	129.906
gene:GYO_1942	10991.6	5562.19	3607.23	7200.38	2949.11	3242.43	3176.49	3322.53	1.10825	0.00151627	0.0061946	acpP	Chromosome	1768918	1769151	+	234	protein_coding	- && PF00550:Phosphopantetheine attachment site	PP-binding	8138	5658	4194	8868	2555	3104	3662	3137	8758.53	4574.71	3001.84	5994.2	2389.91	2735.05	2745.31	2844.49
gene:GYO_3251	503.792	473.838	405.104	375.122	327.807	227.722	276.707	296.56	0.637843	0.00152382	0.00621948	-	Chromosome	3009937	3010656	-	720	protein_coding	- && PF01479:S4 domain|PF00849:RNA pseudouridylate synthase	S4	373	482	471	462	284	218	319	280	130.469	126.658	109.563	101.492	86.3362	62.4285	77.7224	82.5146
gene:GYO_1846	112.104	401.091	141.915	136.408	73.8721	72.0773	65.924	81.554	1.43278	0.00153086	0.00624222	-	Chromosome	1673082	1673636	+	555	protein_coding	- && PF03602:Conserved hypothetical protein 95	-	83	408	165	168	64	69	76	77	37.663	139.086	49.7927	47.8782	25.2403	25.6339	24.022	29.4376
gene:GYO_3301	337.662	601.637	369.84	341.02	289.717	153.556	197.772	189.587	0.991462	0.00153647	0.00625909	-	Chromosome	3059778	3060362	+	585	protein_coding	- && PF06962:Putative rRNA methylase	-	250	612	430	420	251	147	228	179	107.625	197.93	123.108	113.557	93.9129	51.8108	68.3703	64.9236
Novel00138	2.7013	15.7291	4.30047	17.051	141.973	37.6055	27.7575	21.1829	-2.50219	0.00154381	0.00627524	-	Chromosome	1063600	1064939	-	1340	-	-	-	2	16	5	21	123	36	32	20	0.375885	2.25908	0.624943	2.47877	20.0913	5.53932	4.18922	3.16687
Novel00532	12.1558	4.91533	8.60094	13.8032	57.7126	25.0704	32.962	15.8871	-1.73667	0.00154424	0.00627524	-	Chromosome	3353347	3353623	+	277	-	PF08450:SMP-30/Gluconolactonase/LRE-like region	-	9	5	10	17	50	24	38	15	8.18262	3.41513	6.04638	9.70713	39.5091	17.8645	24.0653	11.4899
gene:GYO_2646	407.896	452.211	432.627	411.659	477.86	831.5	1053.05	735.045	-0.862389	0.00154486	0.00627524	-	Chromosome	2463589	2464758	+	1170	protein_coding	- && PF07690:Major Facilitator Superfamily	MFS_1	302	460	503	507	414	796	1214	694	65.0056	74.3855	72.0041	68.54	77.45	140.277	182.021	125.857
gene:GYO_3030	447.065	802.183	324.255	503.41	332.424	184.894	190.833	242.544	1.12835	0.00155014	0.0062907	pheA	Chromosome	2796634	2797488	-	855	protein_coding	- && PF00800:Prephenate dehydratase|PF01842:ACT domain	ACT	331	816	377	620	288	177	220	229	97.497	180.568	73.85	114.696	73.7282	42.6841	45.1383	56.8296
gene:GYO_3979	183.688	148.443	178.899	194.056	512.488	201.607	298.393	485.088	-1.08599	0.00155783	0.00631588	-	Chromosome	3697028	3697579	-	552	protein_coding	- && PF14435:SUKH-4 immunity protein	-	136	151	208	239	444	193	344	458	62.0482	51.7552	63.1102	68.4826	176.056	72.0904	109.322	176.048
gene:GYO_2624	262.026	136.646	215.884	185.937	330.116	355.163	342.631	324.098	-0.759865	0.00158002	0.00639977	-	Chromosome	2443001	2444635	-	1635	protein_coding	- && PF01546:Peptidase family M20/M25/M40	Peptidase_M20	194	139	251	229	286	340	395	306	29.8823	16.0847	25.7117	22.1534	38.2874	42.8766	42.3806	39.7108
gene:GYO_2570	3579.22	2365.26	4469.91	3057	1214.27	1980.56	1053.05	2187.13	1.06597	0.00158891	0.00642963	-	Chromosome	2401576	2402448	+	873	protein_coding	- && PF06207:Protein of unknown function (DUF1002)	-	2650	2406	5197	3765	1052	1896	1214	2065	764.471	521.432	997.042	682.138	263.76	447.799	243.945	501.893
gene:GYO_3736	76.987	74.7131	71.3878	53.5888	31.1648	36.5609	43.371	42.3657	0.83861	0.00160334	0.00648187	-	Chromosome	3454110	3454727	-	618	protein_coding	- && PF11193:Protein of unknown function (DUF2812)	-	57	76	83	66	27	35	50	40	23.2282	23.2671	22.4939	16.8918	9.56274	11.6772	14.1929	13.7334
sRNA00060	2.7013	2.9492	1.72019	1.6239	65.7923	9.40138	2.60226	8.47315	-3.27368	0.00160555	0.00648464	-	Chromosome	2475070	2475145	+	76	-	-	-	2	3	2	2	57	9	3	8	6.62744	7.46834	4.40749	4.16235	164.16	24.4168	6.92462	22.3348
gene:GYO_2114	51.3247	88.476	144.496	82.819	35.7818	42.8285	39.0339	47.6614	1.15772	0.00161024	0.00649744	xylA	Chromosome	1992284	1993621	+	1338	protein_coding	- && PF01261:Xylose isomerase-like TIM barrel	-	38	90	168	102	31	41	45	45	7.15248	12.7263	21.0295	12.0577	5.07122	6.3181	5.8999	7.13611
Novel00169	9.45455	5.8984	18.9221	6.49561	132.739	26.115	21.6855	25.4194	-2.32856	0.00161628	0.00651562	-	Chromosome	1213585	1214374	-	790	-	PF13460:NAD(P)H-binding|PF00501:AMP-binding enzyme	AMP-binding	7	6	22	8	115	25	25	24	2.23152	1.43695	4.66413	1.60171	31.8624	6.52487	5.55138	6.44599
gene:GYO_1549	64.8312	91.4252	315.654	162.39	5.77126	36.5609	58.1172	41.3066	2.15907	0.00162032	0.00652574	-	Chromosome	1417921	1418685	-	765	protein_coding	- && PF01925:Sulfite exporter TauE/SafE	-	48	93	367	200	5	35	67	39	15.8019	23.0005	80.3488	41.3514	1.43059	9.43334	15.3639	10.817
gene:GYO_4187	271.481	363.735	311.354	400.292	247.01	211.009	200.374	216.065	0.627035	0.00162283	0.00652968	-	Chromosome	3886294	3887100	-	807	protein_coding	- && PF00535:Glycosyl transferase family 2	Glycos_transf_2	201	370	362	493	214	202	231	204	62.7266	86.7451	75.1294	96.6262	58.0427	51.6103	50.2142	53.6367
Novel00320	4.05195	0.983067	2.58028	9.74342	38.0903	15.669	31.2271	8.47315	-2.40422	0.0016416	0.00659895	-	Chromosome	2199789	2200097	+	309	-	PF01258:Prokaryotic dksA/traR C4-type zinc finger	zf-dskA_traR	3	1	3	12	33	15	36	8	2.44507	0.612291	1.62606	6.14249	23.3756	10.009	20.4377	5.49334
gene:GYO_3430	10.8052	11.7968	26.6629	21.9227	38.0903	21.9366	114.5	90.0272	-1.88352	0.0016469	0.00661402	-	Chromosome	3169727	3170548	+	822	protein_coding	- && PF00561:alpha/beta hydrolase fold	Abhydrolase_1	8	12	31	27	33	21	132	85	2.45102	2.76201	6.31633	5.19534	8.78718	5.26752	28.1702	21.9408
gene:GYO_4071	230.961	248.716	204.702	221.663	111.962	135.798	181.291	133.452	0.682784	0.00165006	0.00662044	-	Chromosome	3779850	3780890	-	1041	protein_coding	- && PF03481:Putative GTP-binding controlling metal-binding|PF01300:Telomere recombination	Sua5_yciO_yrdC	171	253	238	273	97	130	209	126	41.369	45.9818	38.2914	41.4795	20.3952	25.7485	35.2195	25.6818
gene:GYO_0175	7211.12	20369.1	8377.31	7765.5	5209.14	4386.27	4992.87	4407.09	1.20276	0.00165875	0.00664904	rplM	Chromosome	153926	154363	+	438	protein_coding	- && PF00572:Ribosomal protein L13	-	5339	20720	9740	9564	4513	4199	5756	4161	3069.84	8950.19	3724.43	3453.72	2255.27	1976.65	2305.34	2015.71
gene:GYO_4347	38484.1	23027.4	28958.5	31784.6	62439.2	60597.1	38807.5	50471.4	-0.796331	0.00166257	0.0066581	-	Chromosome	4041446	4042747	-	1302	protein_coding	- && PF07831:Pyrimidine nucleoside phosphorylase C-terminal domain|PF00591:Glycosyl transferase family, a/b domain|PF02885:Glycosyl transferase family, helical bundle domain	Glycos_trans_3N	28493	23424	33669	39146	54095	58010	44739	47653	5511.33	3403.82	4331.06	4755.52	9093.97	9186.52	6027.86	7765.77
gene:GYO_3164	25369.3	20830.2	18584	21048.2	32339.8	37273.4	26321.9	32790	-0.584743	0.00166532	0.00666285	mdh	Chromosome	2926867	2927805	-	939	protein_coding	- && PF00056:lactate/malate dehydrogenase, NAD binding domain|PF02866:lactate/malate dehydrogenase, alpha/beta C-terminal domain	-	18783	21189	21607	25923	28018	35682	30345	30959	5037.66	4269.35	3853.93	4366.58	6530.99	7835.06	5669.04	6995.63
gene:GYO_3090	6980.16	4321.56	5861.54	6107.5	10076.6	9641.64	7971.59	8747.46	-0.646964	0.00167266	0.00668592	-	Chromosome	2852288	2854048	-	1761	protein_coding	- && PF00890:FAD binding domain|PF02910:Fumarate reductase flavoprotein C-term	-	5168	4396	6815	7522	8730	9230	9190	8259	739.082	472.297	648.159	675.609	1085.08	1080.69	915.47	995.115
Novel00030	40.5195	17.6952	51.6056	50.341	218.153	73.1219	90.2117	87.9089	-1.54662	0.0016763	0.00669418	-	Chromosome	111818	113298	-	1481	-	PF00749:tRNA synthetases class I (E and Q), catalytic domain	-	30	18	60	62	189	70	104	83	5.10147	2.2995	6.78533	6.62153	27.9328	9.74545	12.3187	11.8913
gene:GYO_2328	406.546	118.951	620.988	494.478	720.253	1239.94	1670.65	1203.19	-1.55845	0.00171975	0.00686129	-	Chromosome	2199727	2200218	-	492	protein_coding	- && PF01258:Prokaryotic dksA/traR C4-type zinc finger	zf-dskA_traR	301	121	722	609	624	1187	1926	1136	154.075	46.5304	245.78	195.783	277.605	497.444	686.719	489.912
gene:GYO_0402	910.338	2661.16	520.357	669.86	504.408	239.213	416.362	292.324	1.71312	0.00175757	0.00700559	-	Chromosome	339964	341592	+	1629	protein_coding	- && PF02690:Na+/Pi-cotransporter|PF01895:PhoU domain	Na_Pi_cotrans	674	2707	605	825	437	229	480	276	104.2	314.401	62.2027	80.1041	58.7175	28.985	51.6902	35.9495
gene:GYO_0686	1680.21	2817.47	1558.49	1467.2	1157.71	985.056	1004.47	1077.15	0.832676	0.00176076	0.00701175	-	Chromosome	635414	635695	+	282	protein_coding	- && PF01402:Ribbon-helix-helix protein, copG family	RHH_1	1244	2866	1812	1807	1003	943	1158	1017	1110.97	1922.84	1076.18	1013.52	778.501	689.48	720.357	765.204
gene:GYO_2163	2300.16	1146.26	1294.44	1040.11	760.652	780.315	705.213	781.648	0.932286	0.00179096	0.00712536	-	Chromosome	2027748	2028230	+	483	protein_coding	- && PF07301:Protein of unknown function (DUF1453)	-	1703	1166	1505	1281	659	747	813	738	887.967	456.739	521.872	419.492	298.638	318.884	295.278	324.201
gene:GYO_2107	35.1169	44.238	14.6216	21.1107	47.3243	83.5679	62.4543	104.855	-1.38547	0.00180856	0.00718865	-	Chromosome	1984141	1985019	+	879	protein_coding	- && PF09346:SMI1 / KNR4 family (SUKH-1)	-	26	45	17	26	41	80	72	99	7.44927	9.6859	3.23918	4.6785	10.2094	18.7655	14.3692	23.8975
Novel00536	5.4026	1.96613	6.88075	4.05976	88.8773	8.35679	15.6136	10.5914	-2.74966	0.00181074	0.00719059	-	Chromosome	3385524	3386277	+	754	-	PF13462:Thioredoxin|PF02600:Disulfide bond formation protein DsbB	DsbB	4	2	8	5	77	8	18	10	1.33604	0.501851	1.77703	1.04887	22.3525	2.18765	4.18783	2.81406
Novel00521	0	0.983067	3.44037	1.6239	58.8668	3.13379	12.1439	4.23657	-3.62106	0.0018415	0.00730592	-	Chromosome	3292103	3292723	+	621	-	PF17912:MalK OB fold domain|PF03459:TOBE domain	TOBE	0	1	4	2	51	3	14	4	0	0.304667	1.07881	0.509401	17.9757	0.996067	3.9548	1.3667
gene:GYO_3610	85.0909	292.954	70.5277	67.392	50.7871	40.7393	33.8294	33.8926	1.69753	0.00185092	0.00733646	-	Chromosome	3337882	3338067	-	186	protein_coding	- && PF13113:Protein of unknown function (DUF3970)	-	63	298	82	83	44	39	39	32	85.3016	303.124	73.8373	70.5808	51.7782	43.2325	36.7824	36.5042
gene:GYO_2721	2138.08	853.302	989.968	1085.58	717.944	598.555	508.308	597.357	1.0643	0.00185468	0.00734454	sinR	Chromosome	2533313	2533654	+	342	protein_coding	- && PF08671:Anti-repressor SinI|PF01381:Helix-turn-helix	HTH_3	1583	868	1151	1337	622	573	586	564	1165.69	480.187	563.669	618.34	398.081	345.452	300.58	349.912
gene:GYO_1857	218.805	274.276	151.376	123.417	110.808	107.594	82.4049	78.3766	1.01678	0.00190291	0.0075285	-	Chromosome	1680972	1681868	+	897	protein_coding	- && PF02558:Ketopantoate reductase PanE/ApbA|PF08546:Ketopantoate reductase PanE/ApbA C terminal	-	162	279	176	152	96	103	95	74	45.4833	58.8475	32.8621	26.8024	23.4253	23.6757	18.5789	17.5043
Novel00564	0	2.9492	1.72019	0.811951	30.0105	6.26759	3.46968	11.6506	-3.16769	0.00191381	0.00756461	-	Chromosome	3567826	3567990	+	165	-	-	-	0	3	2	1	26	6	4	11	0	3.43996	2.03012	0.958601	34.4903	7.49767	4.2527	14.1454
gene:GYO_3440	298.494	922.117	314.794	378.369	245.856	166.091	187.363	170.522	1.31443	0.00192332	0.00759174	-	Chromosome	3178386	3178943	-	558	protein_coding	- && -	-	221	938	366	466	213	159	216	161	99.7442	318.043	109.856	132.091	83.5512	58.7519	67.9059	61.2205
gene:GYO_1623	248.52	100.273	674.313	227.346	90.0316	113.861	80.6701	108.033	1.67236	0.00192424	0.00759174	-	Chromosome	1479745	1480944	+	1200	protein_coding	- && PF00175:Oxidoreductase NAD-binding domain|PF00970:Oxidoreductase FAD-binding domain|PF00042:Globin	NAD_binding_1	184	102	784	280	78	109	93	102	38.6159	16.0818	109.423	36.9061	14.2272	18.7286	13.5953	18.0353
gene:GYO_3041	1786.91	2778.15	2187.22	2104.58	1382.79	1245.16	1242.15	1704.16	0.66836	0.00194702	0.00767452	minD	Chromosome	2803121	2803927	-	807	protein_coding	- && PF01656:CobQ/CobB/MinD/ParA nucleotide binding domain	CbiA	1323	2826	2543	2592	1198	1192	1432	1609	412.872	662.545	527.774	508.023	324.931	304.552	311.285	423.046
gene:GYO_3486	41.8701	27.5259	9.46103	17.8629	4.617	11.4906	3.46968	2.11829	2.14688	0.00196289	0.00772989	-	Chromosome	3222303	3222512	-	210	protein_coding	- && PF03621:MbtH-like protein	-	31	28	11	22	4	11	4	2	37.1768	25.2264	8.773	16.5701	4.16915	10.8002	3.3414	2.02077
gene:GYO_1448	957.611	757.945	754.302	945.111	1521.3	1295.3	1133.72	1154.47	-0.580147	0.00197811	0.00778263	oppB	Chromosome	1331507	1332442	+	936	protein_coding	- && PF00528:Binding-protein-dependent transport system inner membrane component	BPD_transp_1	709	771	877	1164	1318	1240	1307	1090	190.765	155.846	156.927	196.698	308.21	273.152	244.956	247.09
gene:GYO_2342	66.1818	17.6952	37.8441	31.6661	100.42	95.0584	74.5982	87.9089	-1.23843	0.00199364	0.00783649	sodC	Chromosome	2215756	2216346	-	591	protein_coding	- && PF00080:Copper/zinc superoxide dismutase (SODC)	-	49	18	44	39	87	91	86	83	20.8804	5.76238	12.4692	10.4376	32.221	31.7477	25.527	29.7986
gene:GYO_1702	145.87	246.75	201.262	168.886	66.9466	88.7908	124.909	119.683	0.928544	0.00201769	0.00792372	queD	Chromosome	1548858	1549298	+	441	protein_coding	- && PF01242:6-pyruvoyl tetrahydropterin synthase	-	108	251	234	208	58	85	144	113	61.6758	107.684	88.8694	74.6013	28.787	39.741	57.2812	54.3682
gene:GYO_3266	8.1039	12.7799	36.1239	41.4095	53.0956	78.3449	103.223	74.14	-1.63034	0.00202851	0.00795886	-	Chromosome	3025583	3026344	-	762	protein_coding	- && PF01370:NAD dependent epimerase/dehydratase family	Epimerase	6	13	42	51	46	75	119	70	1.98301	3.22779	9.23144	10.5861	13.2133	20.2939	27.3956	19.4916
gene:GYO_0739	240.416	197.596	228.785	148.587	143.127	97.1476	122.306	76.2583	0.891908	0.00203452	0.0079751	-	Chromosome	673152	673937	+	786	protein_coding	- && PF12844:Helix-turn-helix domain	-	178	201	266	183	124	93	141	72	57.0331	48.3827	56.6806	36.8256	34.5308	24.396	31.4691	19.4364
gene:GYO_0379	12.1558	9.83067	12.9014	15.4271	1.15425	2.0892	6.07194	3.17743	1.96298	0.00207811	0.00813847	-	Chromosome	322551	322841	+	291	protein_coding	- && -	-	9	10	15	19	1	2	7	3	7.78895	6.50165	8.63323	10.3272	0.752167	1.41709	4.21981	2.18743
gene:GYO_1540	32.4156	27.5259	41.2845	30.8542	53.0956	63.7205	65.0565	52.9572	-0.829469	0.00209383	0.00819251	-	Chromosome	1407007	1408386	+	1380	protein_coding	- && PF13347:MFS/sugar transport protein	-	24	28	48	38	46	61	75	50	4.37987	3.8388	5.82555	4.35538	7.29602	9.11401	9.5339	7.6877
gene:GYO_2961	599.689	308.683	238.246	376.745	120.042	203.697	180.423	208.651	1.09305	0.00213302	0.00833818	-	Chromosome	2729315	2729683	-	369	protein_coding	- && PF10057:Uncharacterized conserved protein (DUF2294)	-	444	314	277	464	104	195	208	197	303.03	160.998	125.727	198.89	61.6899	108.96	98.8838	113.278
gene:GYO_2160	152.623	51.1195	80.8488	58.4605	41.553	26.115	37.2991	32.8334	1.30742	0.00214334	0.00837082	-	Chromosome	2026109	2026300	-	192	protein_coding	- && PF09388:Spo0E like sporulation regulatory protein	-	113	52	94	72	36	25	43	31	148.22	51.2411	81.9977	59.3134	41.0401	26.8471	39.2876	34.2583
gene:GYO_2495	64.8312	50.1364	37.8441	34.9139	116.579	92.9692	66.7914	87.9089	-0.968414	0.00218944	0.00854305	trpE	Chromosome	2342424	2343971	-	1548	protein_coding	- && PF04715:Anthranilate synthase component I, N terminal region|PF00425:chorismate binding enzyme	-	48	51	44	43	101	89	77	83	7.80908	6.23327	4.76055	4.39359	14.281	11.8544	8.72585	11.3766
gene:GYO_3298	16.2078	46.2041	13.7615	17.051	5.77126	1.0446	9.54163	1.05914	2.39712	0.00219658	0.00856304	-	Chromosome	3058087	3058224	-	138	protein_coding	- && -	-	12	47	16	21	5	1	11	1	21.8994	64.437	19.4185	24.0692	7.93046	1.4941	13.983	1.53754
gene:GYO_4167	178.286	184.817	440.368	293.926	393.6	652.874	726.031	667.26	-1.15091	0.00221155	0.00861353	-	Chromosome	3870113	3870577	-	465	protein_coding	- && -	-	132	188	512	362	341	625	837	630	71.4908	76.493	184.413	123.134	160.512	277.132	315.763	287.47
gene:GYO_0936	153.974	354.887	215.023	188.373	99.2656	98.1922	130.113	131.334	0.991422	0.00225278	0.00876608	-	Chromosome	855964	857346	+	1383	protein_coding	- && PF05958:tRNA (Uracil-5-)-methyltransferase|PF01938:TRAM domain	-	114	361	250	232	86	94	150	124	20.7593	49.3857	30.2756	26.5331	13.6108	14.0141	19.0264	19.0241
gene:GYO_1219	4987.95	4089.56	5574.27	4622.44	2781.75	3634.16	3382.07	3504.7	0.53488	0.00228564	0.00888582	-	Chromosome	1117631	1119376	+	1746	protein_coding	- && PF02878:Phosphoglucomutase/phosphomannomutase, alpha/beta/alpha domain I|PF02879:Phosphoglucomutase/phosphomannomutase, alpha/beta/alpha domain II|PF02880:Phosphoglucomutase/phosphomannomutase, alpha/beta/alpha domain III|PF00408:Phosphoglucomutase/p	PGM_PMM_III	3693	4160	6481	5693	2410	3479	3899	3309	532.678	450.781	621.688	515.726	302.12	410.837	391.739	402.122
gene:GYO_1136	746.909	685.198	455.85	406.788	295.488	382.323	320.078	293.383	0.827731	0.00229019	0.00889536	-	Chromosome	1050233	1050763	+	531	protein_coding	- && PF04167:Protein of unknown function (DUF402)	-	553	697	530	501	256	366	369	277	262.277	248.345	167.169	149.233	105.524	142.117	121.905	110.685
gene:GYO_1461	352.52	382.413	317.375	290.679	198.531	270.551	150.931	180.054	0.74762	0.00229676	0.00891278	-	Chromosome	1344641	1345039	-	399	protein_coding	- && PF01152:Bacterial-like globin	-	261	389	369	358	172	259	174	170	164.739	184.456	154.892	141.916	94.3545	133.84	76.5005	90.4027
gene:GYO_1609	818.494	762.86	841.172	824.131	480.169	569.306	451.926	679.97	0.57418	0.00230513	0.00893709	-	Chromosome	1464599	1465960	-	1362	protein_coding	- && PF13180:PDZ domain|PF13365:Trypsin-like peptidase domain	-	606	776	978	1015	416	545	521	642	112.053	107.796	120.264	117.872	66.8534	82.5046	67.1041	100.015
gene:GYO_2137	176.935	45.2211	92.8901	50.341	18.468	28.2042	28.6249	44.484	1.60138	0.00231579	0.00896065	-	Chromosome	2008622	2008810	+	189	protein_coding	- && -	-	131	46	108	62	16	27	33	42	174.558	46.0482	95.7055	51.8862	18.5296	29.4551	30.6295	47.1512
gene:GYO_0930	517.299	1022.39	434.347	422.215	317.419	301.889	277.575	269.022	1.03933	0.00231737	0.00896065	gatC	Chromosome	847478	847768	+	291	protein_coding	- && PF02686:Glu-tRNAGln amidotransferase C subunit	-	383	1040	505	520	275	289	320	254	331.463	676.172	290.652	282.639	206.846	204.769	192.906	185.202
gene:GYO_2179	1130.49	1444.13	1340.89	1558.95	2643.24	1666.13	1976.85	2705.05	-0.715257	0.00231752	0.00896065	parC	Chromosome	2039053	2041119	+	2067	protein_coding	- && PF03989:DNA gyrase C-terminal domain, beta-propeller|PF00521:DNA gyrase/topoisomerase IV, subunit A	-	837	1469	1559	1920	2290	1595	2279	2554	101.98	134.461	126.322	146.921	242.495	159.103	193.416	262.172
gene:GYO_4074	109.403	147.46	46.4451	69.8278	41.553	34.4717	27.7575	47.6614	1.30027	0.00232824	0.00899393	-	Chromosome	3782373	3782735	+	363	protein_coding	- && PF17094:Uncharacterised protein family (UPF0715)	-	81	150	54	86	36	33	32	45	56.1963	78.181	24.9151	37.4726	21.7072	18.7442	15.4643	26.3034
gene:GYO_2540	241.766	223.156	170.299	127.476	128.122	98.1922	102.356	92.1455	0.854774	0.00233049	0.00899447	aroC	Chromosome	2379298	2380065	-	768	protein_coding	- && PF01487:Type I 3-dehydroquinase	-	179	227	198	157	111	94	118	87	58.6977	55.9218	43.1796	32.3341	31.6351	25.2363	26.9531	24.0361
gene:GYO_4361	18.9091	23.5936	11.1812	8.11951	2.3085	5.22299	3.46968	5.29572	1.90447	0.00233546	0.0090055	-	Chromosome	4054955	4055941	-	987	protein_coding	- && PF02275:Linear amide C-N hydrolases, choloylglycine hydrolase family	-	14	24	13	10	2	5	4	5	3.57224	4.60056	2.20598	1.60252	0.443527	1.04451	0.710937	1.07488
Novel00655	0	1.96613	8.60094	9.74342	113.117	26.115	26.89	6.35486	-3.04501	0.00235375	0.00906587	-	Chromosome	4081420	4082135	-	716	-	PF00083:Sugar (and other) transporter	Sugar_tr	0	2	10	12	98	25	31	6	0	0.528486	2.33917	2.65088	29.9585	7.19923	7.59516	1.77805
gene:GYO_1174	16.2078	25.5597	24.0826	13.8032	2.3085	3.13379	6.07194	11.6506	1.77531	0.00235538	0.00906587	-	Chromosome	1076012	1076281	+	270	protein_coding	- && PF00253:Ribosomal protein S14p/S29e	Ribosomal_S14	12	26	28	17	2	3	7	11	11.193	18.2191	17.3688	9.9588	1.62134	2.29095	4.54802	8.64439
Novel00087	33.7662	22.6105	15.4817	25.9824	77.3348	51.1853	49.443	37.07	-1.14951	0.00235798	0.00906767	-	Chromosome	703761	704179	+	419	-	PF02627:Carboxymuconolactone decarboxylase family	CMD	25	23	18	32	67	49	57	35	15.0264	10.3856	7.19504	12.0797	35	24.1124	23.8643	17.7239
gene:GYO_2839	235.013	184.817	121.273	101.494	539.035	258.016	288.851	335.748	-1.14916	0.00237147	0.00911133	sda	Chromosome	2628490	2628630	+	141	protein_coding	- && PF08970:Sporulation inhibitor A	-	174	188	141	125	467	247	333	317	310.785	252.264	167.485	140.221	724.945	361.191	414.298	477.03
gene:GYO_1655	18.9091	29.492	23.2225	17.8629	60.0211	41.7839	31.2271	63.5486	-1.12746	0.00242008	0.00928971	-	Chromosome	1506013	1506345	-	333	protein_coding	- && PF13411:MerR HTH family regulatory protein	-	14	30	27	22	52	40	36	60	10.588	17.0449	13.5798	10.4496	34.1795	24.7671	18.9647	38.2307
gene:GYO_2384	94.5455	102.239	119.553	72.2637	124.659	164.002	218.59	188.527	-0.842831	0.00242369	0.00929516	cgeE	Chromosome	2246941	2247720	-	780	protein_coding	- && PF00583:Acetyltransferase (GNAT) family	Acetyltransf_1	70	104	139	89	108	157	252	178	22.6013	25.2264	29.8466	18.0475	30.3065	41.5015	56.6753	48.4207
gene:GYO_3485	1072.42	693.062	689.795	749.431	1028.44	1553.32	1531	1263.56	-0.747827	0.00243195	0.00931845	-	Chromosome	3221582	3222259	+	678	protein_coding	- && PF10042:Uncharacterized conserved protein (DUF2278)	-	794	705	802	923	891	1487	1765	1193	294.931	196.732	198.116	215.325	287.644	452.21	456.671	373.35
gene:GYO_1284	271.481	221.19	337.157	303.67	418.993	400.081	474.479	415.184	-0.590923	0.00245406	0.00938703	-	Chromosome	1179186	1182074	+	2889	protein_coding	- && PF13514:AAA domain	-	201	225	392	374	363	383	547	392	17.5218	14.735	22.7255	20.476	27.5021	27.3344	33.2145	28.7901
gene:GYO_1349	12.1558	5.8984	8.60094	4.05976	19.6223	32.3825	16.481	18.0054	-1.53443	0.00245425	0.00938703	-	Chromosome	1233802	1234002	-	201	protein_coding	- && PF11755:Protein of unknown function (DUF3311)	-	9	6	10	5	17	31	19	17	11.2765	5.6477	8.33257	3.93456	18.5123	31.7998	16.5823	17.9456
gene:GYO_4138	498.39	667.502	501.435	442.514	368.206	378.145	321.813	328.334	0.595581	0.00246034	0.00940187	-	Chromosome	3842549	3843208	-	660	protein_coding	- && PF02163:Peptidase family M50	Peptidase_M50	369	679	583	545	319	362	371	310	140.803	194.645	147.945	130.609	105.792	113.09	98.6094	99.6605
gene:GYO_1092	18.9091	172.037	196.101	148.587	15.0053	42.8285	34.6968	44.484	1.96808	0.0024686	0.00942497	-	Chromosome	1010708	1011565	+	858	protein_coding	- && PF00903:Glyoxalase/Bleomycin resistance protein/Dioxygenase superfamily	Glyoxalase	14	175	228	183	13	41	40	42	4.10932	38.5893	44.5064	33.7354	3.31637	9.85271	8.17826	10.3865
gene:GYO_3111	406.546	1053.85	445.529	518.025	279.329	326.959	275.84	275.377	1.06669	0.00249422	0.00951423	pheS	Chromosome	2875412	2876446	-	1035	protein_coding	- && PF02912:Aminoacyl tRNA synthetase class II, N-terminal domain|PF01409:tRNA synthetases class II core domain (F)	tRNA-synt_2d	301	1072	518	638	242	313	318	260	73.2412	195.962	83.8232	97.4994	51.1779	62.3538	53.8983	53.3014
gene:GYO_1557	3804.78	688.147	1294.44	1422.54	681.008	664.364	617.603	609.007	1.48672	0.00250545	0.00954647	-	Chromosome	1423598	1423975	-	378	protein_coding	- && PF08000:Bacterial PH domain	-	2817	700	1505	1752	590	636	712	575	1876.83	350.367	666.837	733.101	341.639	346.916	330.428	322.761
gene:GYO_0970	5.4026	5.8984	12.0413	8.93147	33.4733	17.7582	26.89	14.828	-1.49515	0.00250715	0.00954647	-	Chromosome	892529	894037	+	1509	protein_coding	- && PF01547:Bacterial extracellular solute-binding protein	SBP_bac_1	4	6	14	11	29	17	31	14	0.667575	0.752278	1.55387	1.15299	4.20645	2.32284	3.6038	1.96854
gene:GYO_1069	117.507	220.207	179.76	159.954	117.734	67.8989	92.814	91.0863	0.8786	0.00252583	0.00960898	-	Chromosome	988916	989899	+	984	protein_coding	- && PF01207:Dihydrouridine synthase (Dus)	Dus	87	224	209	197	102	65	107	86	22.2666	43.0695	35.5735	31.666	22.6888	13.62	19.0755	18.5442
gene:GYO_2398	160.727	96.3405	124.714	128.288	180.063	269.506	196.037	208.651	-0.748433	0.00254031	0.00965314	-	Chromosome	2258227	2258808	-	582	protein_coding	- && PF02630:SCO1/SenC	-	119	98	145	158	156	258	226	197	51.4936	31.8581	41.7273	42.9394	58.669	91.402	68.1198	71.8205
Novel00566	4.05195	2.9492	6.02066	11.3673	137.356	8.35679	19.9507	11.6506	-2.84179	0.00254197	0.00965314	-	Chromosome	3578675	3579004	+	330	-	-	-	3	3	7	14	119	8	23	11	2.28948	1.71998	3.5527	6.71021	78.9297	4.99845	12.2265	7.07268
gene:GYO_4049	6468.26	9916.2	7573.13	6749.75	4443.87	5416.24	5283.46	5059.53	0.604011	0.00255163	0.0096812	-	Chromosome	3764817	3766127	-	1311	protein_coding	- && PF00275:EPSP synthase (3-phosphoshikimate 1-carboxyvinyltransferase)	EPSP_synthase	4789	10087	8805	8313	3850	5185	6091	4777	919.965	1455.71	1124.87	1002.94	642.784	815.464	815.031	773.139
gene:GYO_0622	723.948	727.469	771.504	609.775	353.201	580.797	404.218	462.846	0.653006	0.00260826	0.00988724	-	Chromosome	571677	572426	+	750	protein_coding	- && PF08282:haloacid dehalogenase-like hydrolase	Hydrolase_3	536	740	897	751	306	556	466	437	179.984	186.675	200.312	158.38	89.3033	152.852	108.997	123.63
gene:GYO_1713	6.75325	56.0348	32.6836	40.5976	5.77126	12.5352	11.2765	5.29572	1.96438	0.00261509	0.00990432	-	Chromosome	1555198	1555827	+	630	protein_coding	- && PF07486:Cell Wall Hydrolase	-	5	57	38	50	5	12	13	5	1.99875	17.1179	10.1022	12.5531	1.73715	3.92735	3.61985	1.68397
sRNA00112	6.75325	12.7799	18.9221	12.1793	1.15425	1.0446	6.07194	2.11829	2.24072	0.00264046	0.00999151	-	Chromosome	4166870	4166943	-	74	-	-	-	5	13	22	15	1	1	7	2	17.0164	33.2375	49.7927	32.0613	2.95785	2.7863	16.5941	5.73461
Novel00213	9.45455	3.93227	5.16056	5.68366	55.4041	24.0258	13.8787	8.47315	-2.08844	0.00264381	0.0099953	-	Chromosome	1478126	1478224	+	99	-	-	-	7	4	6	7	48	23	16	8	17.8071	7.64436	10.1506	11.1837	106.124	47.9018	28.3513	17.1459
gene:GYO_0176	13058.1	27374.5	11375.6	14693.1	9352.9	7912.83	8545.83	8492.21	0.955022	0.00265861	0.0100423	-	Chromosome	154384	154776	+	393	protein_coding	- && PF00380:Ribosomal protein S9/S16	-	9668	27846	13226	18096	8103	7575	9852	8018	6195.46	13405.6	5636.52	7283.02	4512.95	3974.19	4397.64	4328.91
gene:GYO_1600	375.481	290.988	346.618	269.568	412.068	490.961	486.623	478.733	-0.545903	0.00266613	0.0100618	spoIISA	Chromosome	1455249	1455995	-	747	protein_coding	- && PF14171:Toxin SpoIISA, type II toxin-antitoxin system	-	278	296	403	332	357	470	561	452	93.7246	74.97	90.3565	70.2974	104.606	129.729	131.744	128.388
gene:GYO_0619	24.3117	18.6783	15.4817	10.5554	31.1648	43.8731	31.2271	39.1883	-1.10636	0.00267051	0.0100694	-	Chromosome	570260	570895	-	636	protein_coding	- && PF01738:Dienelactone hydrolase family	-	18	19	18	13	27	42	36	37	7.12762	5.65214	4.74013	3.23302	9.2921	13.616	9.92964	12.3438
gene:GYO_3865	2676.99	2949.2	1994.56	1994.96	1887.2	1337.09	1381.8	1247.67	0.715955	0.00272578	0.0102687	-	Chromosome	3582025	3582852	-	828	protein_coding	- && PF02687:FtsX-like permease family	-	1982	3000	2319	2457	1635	1280	1593	1178	602.841	685.5	469.078	469.35	432.21	318.741	337.5	301.87
gene:GYO_3780	21.6104	25.5597	22.3624	30.8542	13.851	10.446	11.2765	3.17743	1.38009	0.00273729	0.010303	-	Chromosome	3496068	3497489	+	1422	protein_coding	- && PF02435:Levansucrase/Invertase	-	16	26	26	38	12	10	13	3	2.83367	3.45932	3.06231	4.22674	1.84709	1.44997	1.60373	0.447638
Novel00651	4.05195	2.9492	4.30047	5.68366	36.936	16.7136	5.20452	15.8871	-2.11432	0.00274705	0.0103306	-	Chromosome	4070784	4070980	+	197	-	-	-	3	3	5	7	32	16	6	15	3.83517	2.88119	4.25088	5.62022	35.5542	16.7461	5.34285	16.1559
gene:GYO_2238	17.5584	9.83067	13.7615	18.6749	33.4733	29.2488	25.1552	48.7206	-1.1899	0.00277014	0.0103951	-	Chromosome	2133553	2133966	-	414	protein_coding	- && PF17094:Uncharacterised protein family (UPF0715)	-	13	10	16	23	29	28	29	46	7.9081	4.57	6.47284	8.78717	15.3322	13.9449	12.2881	23.5756
gene:GYO_1975	4869.09	3738.6	3226.21	3768.27	5341.87	8265.91	7721.78	5094.48	-0.760328	0.00277096	0.0103951	fliF	Chromosome	1796098	1797693	+	1596	protein_coding	- && PF08345:Flagellar M-ring protein C-terminal|PF01514:Secretory protein of YscJ/FliF family	-	3605	3803	3751	4641	4628	7913	8902	4810	568.855	450.827	393.631	459.939	634.699	1022.27	978.46	639.466
gene:GYO_0668	1150.75	772.691	889.337	1093.7	4041.03	1980.56	1662.85	1240.26	-1.19193	0.00277233	0.0103951	-	Chromosome	618587	619825	+	1239	protein_coding	- && PF00375:Sodium:dicarboxylate symporter family	SDF	852	786	1034	1347	3501	1896	1917	1171	173.18	120.024	139.773	171.956	618.483	315.519	271.418	200.535
gene:GYO_0756	640.208	590.823	449.829	414.907	249.318	383.368	312.271	187.468	0.886412	0.00277397	0.0103951	-	Chromosome	688341	689213	+	873	protein_coding	- && PF02588:Uncharacterised 5xTM membrane BCR, YitT family COG1284|PF10035:Uncharacterized protein conserved in bacteria (DUF2179)	-	474	601	523	511	216	367	360	177	136.739	130.25	100.337	92.5824	54.156	86.6784	72.3397	43.0194
gene:GYO_0022	39.1688	6.88147	55.046	63.3322	69.2551	156.69	180.423	164.167	-1.79184	0.00279172	0.0104524	-	Chromosome	25294	25839	-	546	protein_coding	- && PF00857:Isochorismatase family	Isochorismatase	29	7	64	78	60	150	208	155	13.3763	2.42562	19.6319	22.5956	24.0528	56.6445	66.8281	60.2344
gene:GYO_3635	505.143	318.514	399.944	388.113	633.684	535.879	602.857	745.637	-0.645533	0.00281272	0.0105218	-	Chromosome	3359730	3360959	-	1230	protein_coding	- && PF02687:FtsX-like permease family|PF12704:MacB-like periplasmic core domain	-	374	324	465	478	549	513	695	704	76.5766	49.8375	63.3174	61.4674	97.6955	85.9946	99.1215	121.443
gene:GYO_4306	67.5325	80.6115	68.8075	49.529	48.4786	33.4271	29.4923	31.7743	0.900509	0.00282789	0.0105692	-	Chromosome	3992930	3993790	-	861	protein_coding	- && PF08241:Methyltransferase domain	Methyltransf_11	50	82	80	61	42	32	34	30	14.625	18.0189	15.5619	11.2059	10.6771	7.66312	6.9273	7.39305
gene:GYO_1403	13.5065	26.5428	160.838	77.1354	9.23401	16.7136	17.3484	19.0646	2.15896	0.00283506	0.0105867	yitF	Chromosome	1289627	1290742	-	1116	protein_coding	- && PF13378:Enolase C-terminal domain-like|PF02746:Mandelate racemase / muconate lactonizing enzyme, N-terminal domain	MR_MLE_N	10	27	187	95	8	16	20	18	2.25666	4.57737	28.0642	13.4642	1.56904	2.95607	3.14379	3.42226
gene:GYO_3348	41.8701	8.8476	88.5897	90.1266	103.883	261.15	259.359	226.657	-1.88735	0.00284277	0.0106062	-	Chromosome	3102113	3102580	+	468	protein_coding	- && PF03073:TspO/MBR family	-	31	9	103	111	90	250	299	214	16.6819	3.63842	36.8609	37.5145	42.0924	110.142	112.076	97.0227
gene:GYO_1435	1069.71	352.921	498.854	374.31	180.063	332.182	196.037	234.071	1.28329	0.00284962	0.0106225	comZ	Chromosome	1317519	1317710	+	192	protein_coding	- && PF10815:ComZ	-	792	359	580	461	156	318	226	221	1038.85	353.761	505.943	379.771	177.84	341.495	206.488	244.228
gene:GYO_4200	189.091	162.206	264.909	207.86	93.4943	139.976	108.428	140.866	0.773137	0.00285213	0.0106225	-	Chromosome	3898219	3899220	-	1002	protein_coding	- && PF00296:Luciferase-like monooxygenase	-	140	165	308	256	81	134	125	133	35.1876	31.1554	51.4823	40.4105	17.6939	27.5738	21.8842	28.1637
gene:GYO_2990	1306.08	1416.6	1410.55	1130.24	645.226	831.5	1055.65	880.148	0.624409	0.00287248	0.010689	-	Chromosome	2756303	2757445	-	1143	protein_coding	- && PF00266:Aminotransferase class-V	Aminotran_5	967	1441	1640	1392	559	796	1217	831	213.064	238.525	240.31	192.626	107.047	143.591	186.781	154.262
gene:GYO_1203	91.8442	192.681	1312.5	571.614	4.617	74.1665	106.693	136.629	2.75076	0.0028947	0.0107591	yhcN	Chromosome	1099115	1099696	+	582	protein_coding	- && PF09580:Sporulation lipoprotein YhcN/YlaJ (Spore_YhcN_YlaJ)	-	68	196	1526	704	4	71	123	129	29.4249	63.7162	439.144	191.325	1.50433	25.1533	37.0741	47.0297
gene:GYO_2727	2.7013	3.93227	7.74084	4.87171	13.851	13.5798	17.3484	13.7689	-1.56358	0.00289638	0.0107591	-	Chromosome	2536804	2537178	-	375	protein_coding	- && PF14173:ComG operon protein 7	-	2	4	9	6	12	13	20	13	1.34316	2.01811	4.01963	2.53071	7.00418	7.14778	9.35593	7.35559
gene:GYO_2712	884.676	1493.28	821.389	786.781	690.242	551.548	434.578	486.147	0.882705	0.00291456	0.0108171	-	Chromosome	2524097	2524525	-	429	protein_coding	- && PF02742:Iron dependent repressor, metal binding and dimerisation domain|PF01325:Iron dependent repressor, N-terminal DNA binding domain	Fe_dep_repress	655	1519	955	969	598	528	501	459	384.515	669.911	372.839	357.263	305.106	253.767	204.865	227.018
gene:GYO_2953	984.624	923.1	1588.59	1333.22	421.302	731.219	330.487	795.417	1.0844	0.00292147	0.0108333	-	Chromosome	2722675	2725839	-	3165	protein_coding	- && PF00667:FAD binding domain|PF00175:Oxidoreductase NAD-binding domain|PF00067:Cytochrome P450|PF00258:Flavodoxin	p450	729	939	1847	1642	365	700	381	751	58.0074	56.1317	97.7391	82.058	25.2422	45.6019	21.1174	50.3468
gene:GYO_1704	413.299	433.532	454.99	351.575	250.473	207.875	281.912	328.334	0.629032	0.00296032	0.0109679	queF	Chromosome	1550040	1550537	+	498	protein_coding	- && PF14489:QueF-like protein	-	306	441	529	433	217	199	325	310	154.747	167.543	177.91	137.525	95.3757	82.3916	114.483	132.08
gene:GYO_0126	1023.79	443.363	553.9	580.545	1401.26	1113.54	1255.16	1093.04	-0.903947	0.0029727	0.0110041	sigH	Chromosome	116679	117335	+	657	protein_coding	- && PF04542:Sigma-70 region 2|PF08281:Sigma-70, region 4	Sigma70_r2	758	451	644	715	1214	1066	1447	1032	290.558	129.876	164.171	172.132	404.446	334.542	386.359	333.288
gene:GYO_4099	1.35065	4.91533	19.7822	17.051	21.9308	40.7393	60.7194	52.9572	-2.00005	0.00301773	0.0111519	uvdE	Chromosome	3804744	3805706	+	963	protein_coding	- && PF03851:UV-endonuclease UvdE	UvdE	1	5	23	21	19	39	70	50	0.261519	0.982336	4.00015	3.44917	4.31852	8.35021	12.7515	11.0166
gene:GYO_2267	49.974	43.2549	23.2225	23.5466	13.851	10.446	14.7461	18.0054	1.27782	0.00301784	0.0111519	-	Chromosome	2156410	2157039	-	630	protein_coding	- && PF01965:DJ-1/PfpI family	DJ-1_PfpI	37	44	27	29	12	10	17	17	14.7908	13.2138	7.17791	7.2808	4.16915	3.27279	4.73365	5.7255
gene:GYO_3213	16730.5	47064.3	16403.7	26153.8	12834.1	10457.5	11938.3	13400.3	1.12894	0.00302827	0.0111807	rpsD	Chromosome	2972716	2973318	+	603	protein_coding	- && PF00163:Ribosomal protein S4/S9 N-terminal domain|PF01479:S4 domain	S4	12387	47875	19072	32211	11119	10011	13763	12652	5173.43	15021.3	5297.29	8449.06	4036.04	3423.1	4003.91	4451.92
gene:GYO_1131	461.922	555.433	493.694	357.259	353.201	207.875	285.381	277.496	0.733296	0.00306107	0.011292	mutY	Chromosome	1047094	1048263	+	1170	protein_coding	- && PF00730:HhH-GPD superfamily base excision DNA repair protein|PF14815:NUDIX domain	HhH-GPD	342	565	574	440	306	199	329	262	73.6156	91.3648	82.1677	59.4824	57.2457	35.0692	49.3285	47.5139
gene:GYO_2736	1632.94	211.359	2062.5	2020.14	4707.04	4251.51	6085.82	4665.53	-1.73352	0.00306634	0.0113017	-	Chromosome	2540958	2541368	-	411	protein_coding	- && PF00571:CBS domain	CBS	1209	215	2398	2488	4078	4070	7016	4405	740.822	98.9722	977.197	957.481	2171.76	2041.79	2994.58	2274.1
gene:GYO_3060	164.779	116.002	172.019	164.014	266.632	198.474	340.029	238.307	-0.759581	0.00310706	0.0114418	-	Chromosome	2822851	2823681	-	831	protein_coding	- && PF01578:Cytochrome C assembly protein	-	122	118	200	202	231	190	392	225	36.9733	26.8657	40.3092	38.4479	60.8441	47.1424	82.751	57.4496
gene:GYO_2010	775.273	2057.56	676.034	941.052	622.141	390.68	438.047	490.383	1.19709	0.00311024	0.0114436	dxr	Chromosome	1826456	1827607	+	1152	protein_coding	- && PF13288:DXP reductoisomerase C-terminal domain|PF02670:1-deoxy-D-xylulose 5-phosphate reductoisomerase|PF08436:1-deoxy-D-xylulose 5-phosphate reductoisomerase C-terminal	-	574	2093	786	1159	539	374	505	463	125.484	343.743	114.273	159.13	102.41	66.9388	76.9001	85.2774
gene:GYO_3718	83183.8	33862.7	83476.4	70069.8	23390.9	29910	43276.5	34397.8	1.04682	0.00313917	0.0115401	-	Chromosome	3438642	3439649	-	1008	protein_coding	- && PF02800:Glyceraldehyde 3-phosphate dehydrogenase, C-terminal domain|PF00044:Glyceraldehyde 3-phosphate dehydrogenase, NAD binding domain	-	61588	34446	97055	86298	20265	28633	49891	32477	15387.4	6465.39	16126.2	13541.3	4400.41	5856.87	8682.6	6836.29
gene:GYO_3670	322.805	250.682	301.893	326.404	371.669	519.165	489.225	413.066	-0.578445	0.00314459	0.0115501	-	Chromosome	3396633	3397580	-	948	protein_coding	- && PF00892:EamA-like transporter family	DUF6	239	255	351	402	322	497	564	390	63.492	50.8919	62.0117	67.0717	74.3455	108.095	104.366	87.2894
gene:GYO_1878	10.8052	19.6613	12.9014	27.6063	8.07976	4.17839	6.07194	5.29572	1.60981	0.00316502	0.0116151	spoIIGA	Chromosome	1707331	1708284	+	954	protein_coding	- && PF03419:Sporulation factor SpoIIGA	-	8	20	15	34	7	4	7	5	2.11189	3.96641	2.63341	5.63706	1.60604	0.864511	1.28718	1.11206
gene:GYO_3619	559.169	904.421	676.894	1081.52	590.977	158.779	305.332	279.614	1.27241	0.00317676	0.0116481	-	Chromosome	3345955	3346335	-	381	protein_coding	- && -	-	414	920	787	1332	512	152	352	264	273.656	456.856	345.959	552.969	294.139	82.2579	162.071	147.023
Novel00502	1.35065	0.983067	6.88075	4.87171	42.7073	8.35679	12.1439	13.7689	-2.39156	0.00318458	0.0116668	-	Chromosome	3155983	3156094	+	112	-	-	-	1	1	8	6	37	8	14	13	2.2486	1.68927	11.9632	8.47335	72.3088	14.7276	21.928	24.6281
Novel00599	5.4026	0.983067	2.58028	2.43585	42.7073	6.26759	12.1439	6.35486	-2.60588	0.00322187	0.0117904	-	Chromosome	3777576	3777809	+	234	-	PF04260:Protein of unknown function (DUF436)	-	4	1	3	3	37	6	14	6	4.305	0.808538	2.14724	2.02781	34.6093	5.28682	10.4954	5.44052
gene:GYO_0403	499.74	2285.63	646.79	956.479	526.339	462.757	239.408	255.254	1.56504	0.00322387	0.0117904	-	Chromosome	341618	342508	-	891	protein_coding	- && PF03009:Glycerophosphoryl diester phosphodiesterase family	-	370	2325	752	1178	456	443	276	241	104.581	493.698	141.356	209.117	112.02	102.514	54.34	57.3911
gene:GYO_1754	605.091	643.909	633.889	775.414	415.53	502.452	328.752	490.383	0.615329	0.00324752	0.0118667	-	Chromosome	1593122	1594246	+	1125	protein_coding	- && PF07687:Peptidase dimerisation domain|PF01546:Peptidase family M20/M25/M40	Peptidase_M20	448	655	737	955	360	481	379	463	100.289	110.155	109.721	134.268	70.0418	88.1559	59.0983	87.324
Novel00383	10.8052	9.83067	13.7615	16.239	150.053	24.0258	18.2158	29.656	-2.12187	0.00329336	0.0120239	-	Chromosome	2544952	2545356	+	405	-	PF03960:ArsC family	-	8	10	16	20	130	23	21	28	4.97467	4.67156	6.61668	7.81082	70.258	11.7093	9.09604	14.6693
gene:GYO_0961	8.1039	6.88147	20.6422	4.87171	69.2551	20.892	25.1552	29.656	-1.82589	0.00330004	0.0120379	-	Chromosome	878838	881123	+	2286	protein_coding	- && PF12833:Helix-turn-helix domain	-	6	7	24	6	60	20	29	28	0.661004	0.579346	1.75837	0.415142	5.7449	1.8039	2.22541	2.59889
gene:GYO_3999	193.143	116.985	122.133	116.921	195.068	253.837	229.866	222.42	-0.723219	0.00330442	0.0120436	-	Chromosome	3719813	3720889	-	1077	protein_coding	- && PF00072:Response regulator receiver domain|PF00486:Transcriptional regulatory protein, C terminal	Response_reg	143	119	142	144	169	243	265	210	33.4387	20.9049	22.0825	21.148	34.3462	46.5211	43.1637	41.3722
gene:GYO_2032	1836.88	2869.57	3600.35	3103.28	1501.68	1590.92	1681.06	1995.43	0.753602	0.00333304	0.0121375	-	Chromosome	1850716	1851930	+	1215	protein_coding	- && PF13840:ACT domain|PF00696:Amino acid kinase family	AA_kinase	1360	2919	4186	3822	1301	1523	1938	1884	281.898	454.542	577.029	497.549	234.373	258.454	279.812	329.011
Novel00212	25.6623	18.6783	18.9221	24.3585	140.819	38.6501	62.4543	26.4786	-1.61573	0.0033451	0.012171	-	Chromosome	1476822	1477845	+	1024	-	PF10282:Lactonase, 7-bladed beta-propeller	-	19	19	22	30	122	37	72	25	4.67286	3.51051	3.5983	4.63386	26.0776	7.45008	12.3345	5.18019
gene:GYO_3252	1499.22	2190.27	1294.44	1205.75	1021.51	775.092	989.727	902.39	0.74656	0.00335266	0.0121881	-	Chromosome	3010725	3012359	-	1635	protein_coding	- && PF01943:Polysaccharide biosynthesis protein|PF14667:Polysaccharide biosynthesis C-terminal domain	-	1110	2228	1505	1485	885	742	1141	852	170.976	257.818	154.168	143.658	118.477	93.5718	122.421	110.567
gene:GYO_4515	131.013	119.934	127.294	124.229	233.159	151.467	222.06	173.699	-0.636315	0.00337063	0.012243	gidB	Chromosome	4200491	4201210	-	720	protein_coding	- && PF02527:rRNA small subunit methyltransferase G	-	97	122	148	153	202	145	256	164	33.9288	32.0585	34.4274	33.6109	61.4082	41.5235	62.3729	48.33
gene:GYO_4150	563.221	563.297	298.453	404.352	317.419	247.57	222.927	247.84	0.819956	0.00338638	0.0122897	-	Chromosome	3851322	3852167	-	846	protein_coding	- && PF03099:Biotin/lipoate A/B protein ligase family	BPL_LipA_LipB	417	573	347	498	275	237	257	234	124.135	128.145	68.6964	93.1067	71.1491	57.7613	53.2906	58.6882
gene:GYO_4279	253.922	226.105	331.996	265.508	177.755	185.938	195.17	148.28	0.608226	0.00339982	0.0123241	-	Chromosome	3969940	3971622	+	1683	protein_coding	- && PF01435:Peptidase family M48	Peptidase_M48	188	230	386	327	154	178	225	140	28.1322	25.8559	38.413	30.7316	20.0283	21.8069	23.4524	17.6502
gene:GYO_2389	12.1558	3.93227	13.7615	8.93147	15.0053	25.0704	33.8294	31.7743	-1.4583	0.00340165	0.0123241	-	Chromosome	2251029	2252177	-	1149	protein_coding	- && PF02333:Phytase	-	9	4	16	11	13	24	39	30	1.97266	0.658653	2.33225	1.51424	2.47646	4.30676	5.95433	5.53996
Novel00177	0	3.93227	2.58028	3.24781	20.7765	11.4906	6.07194	9.53229	-2.20779	0.00340884	0.0123397	-	Chromosome	1280258	1280635	+	378	-	PF05163:DinB family	-	0	4	3	4	18	11	7	9	0	2.0021	1.32924	1.67375	10.4229	6.00012	3.24859	5.05191
gene:GYO_1404	21.6104	32.4412	159.117	77.1354	15.0053	18.8028	25.1552	22.242	1.84046	0.00341421	0.0123486	yitG	Chromosome	1290751	1292019	-	1269	protein_coding	- && PF07690:Major Facilitator Superfamily	MFS_1	16	33	185	95	13	18	29	21	3.17532	4.92004	24.4166	11.8409	2.24228	2.92462	4.00889	3.51126
gene:GYO_2435	101.299	194.647	270.069	199.74	330.116	339.494	393.809	386.587	-0.916878	0.00343434	0.0124108	-	Chromosome	2289555	2290145	-	591	protein_coding	- && PF01081:KDPG and KHG aldolase	-	75	198	314	246	286	325	454	365	31.9597	63.3861	88.9851	65.8369	105.922	113.385	134.759	131.042
gene:GYO_3563	494.338	516.11	467.031	384.053	275.866	308.156	268.033	381.292	0.593322	0.00347211	0.0125367	-	Chromosome	3299848	3300972	-	1125	protein_coding	- && PF01266:FAD dependent oxidoreductase	DAO	366	525	543	473	239	295	309	360	81.9328	88.2924	80.8393	66.5013	46.5	54.0665	48.183	67.8977
Novel00258	9.45455	0	2.58028	6.49561	151.207	7.31219	21.6855	7.414	-3.35787	0.00349446	0.0126067	-	Chromosome	1728118	1728604	-	487	-	PF02786:Carbamoyl-phosphate synthase L chain, ATP binding domain	CPSase_L_D2	7	0	3	8	131	7	25	7	3.61992	0	1.03173	2.59826	58.8775	2.96366	9.00532	3.04982
gene:GYO_4054	6778.91	6333.9	5081.43	7100.51	15119.5	9386.76	7773.82	10915.5	-0.772026	0.00351643	0.0126752	atpC	Chromosome	3767952	3768350	-	399	protein_coding	- && PF00401:ATP synthase, Delta/Epsilon chain, long alpha-helix domain|PF02823:ATP synthase, Delta/Epsilon chain, beta-sandwich domain	-	5019	6443	5908	8745	13099	8986	8962	10306	3167.92	3055.14	2479.95	3466.64	7185.76	4643.58	3940.22	5480.53
gene:GYO_1015	332.26	392.244	287.271	284.183	196.223	246.525	201.242	226.657	0.572644	0.0035397	0.0127483	-	Chromosome	938864	939865	-	1002	protein_coding	- && PF01032:FecCD transport family	-	246	399	334	350	170	236	232	214	61.8296	75.3393	55.8282	55.2487	37.1354	48.5627	40.6171	45.316
gene:GYO_3966	1.35065	4.91533	2.58028	4.87171	66.9466	4.17839	9.54163	12.7097	-2.73441	0.0035465	0.012762	-	Chromosome	3686019	3687596	-	1578	protein_coding	- && PF01019:Gamma-glutamyltranspeptidase	-	1	5	3	6	58	4	11	12	0.159596	0.599487	0.318412	0.601404	8.04504	0.522651	1.22285	1.61354
gene:GYO_4352	2.7013	0	1.72019	6.49561	8.07976	18.8028	17.3484	10.5914	-2.29692	0.00357223	0.0128355	-	Chromosome	4045906	4046733	-	828	protein_coding	- && PF06724:Domain of Unknown Function (DUF1206)	-	2	0	2	8	7	18	20	10	0.608316	0	0.404552	1.5282	1.85044	4.4823	4.23729	2.56257
Novel00453	8.1039	3.93227	6.88075	6.49561	23.085	10.446	19.0833	16.9463	-1.46465	0.00357432	0.0128355	-	Chromosome	2902677	2903589	+	913	-	PF04172:LrgB-like family|PF03788:LrgA family	-	6	4	8	8	20	10	22	16	1.65505	0.828907	1.46755	1.38593	4.79476	2.25833	4.22708	3.71839
gene:GYO_0466	168.831	108.137	167.718	133.972	196.223	290.398	248.95	213.947	-0.717439	0.00357681	0.0128355	pcp	Chromosome	400786	401433	-	648	protein_coding	- && PF01470:Pyroglutamyl peptidase	-	125	110	195	165	170	278	287	202	48.5808	32.1169	50.4005	40.2745	57.4224	88.4563	77.6954	66.1427
Novel00371	1.35065	2.9492	2.58028	5.68366	60.0211	9.40138	4.3371	11.6506	-2.72147	0.00358014	0.0128355	-	Chromosome	2472983	2473114	+	132	-	-	-	1	3	3	7	52	9	5	11	1.9079	4.29995	3.80647	8.38776	86.2257	14.0581	6.64484	17.6817
gene:GYO_1891	1041.35	638.01	505.735	513.153	225.079	424.107	353.908	364.345	0.97879	0.00358312	0.0128355	-	Chromosome	1716833	1716946	+	114	protein_coding	- && -	-	771	649	588	632	195	406	408	344	1703.25	1077.1	863.868	876.867	374.401	734.311	627.832	640.264
gene:GYO_3700	12.1558	12.7799	7.74084	8.11951	36.936	27.1596	22.5529	14.828	-1.32992	0.00358503	0.0128355	-	Chromosome	3423537	3424682	-	1146	protein_coding	- && PF00571:CBS domain|PF00005:ABC transporter|PF07673:Protein of unknown function (DUF1602)	ABC_tran	9	13	9	10	32	26	26	14	1.97782	2.14623	1.31532	1.38018	6.11185	4.67787	3.97994	2.59208
gene:GYO_2585	1682.91	3820.2	2633.61	2720.85	996.119	1724.63	1608.2	1406.54	0.920755	0.00358889	0.0128386	deoB	Chromosome	2412784	2413968	-	1185	protein_coding	- && PF01676:Metalloenzyme superfamily	-	1246	3886	3062	3351	863	1651	1854	1328	264.807	620.442	432.775	447.278	159.404	287.268	274.46	237.785
Novel00122	29.7143	30.4751	36.984	63.3322	300.105	72.0773	58.9846	93.2046	-1.70106	0.00359218	0.0128395	-	Chromosome	957379	959197	+	1819	-	PF00884:Sulfatase	Sulfatase	22	31	43	78	260	69	68	88	3.04593	3.22437	3.95923	6.7824	31.2858	7.82124	6.55789	10.2649
gene:GYO_1735	37.8182	30.4751	23.2225	20.2988	9.23401	6.26759	14.7461	14.828	1.28435	0.00359624	0.0128433	-	Chromosome	1579982	1580143	-	162	protein_coding	- && -	-	28	31	27	25	8	6	17	14	43.5284	36.2046	27.9141	24.4088	10.8089	7.63651	18.4087	18.3366
Novel00452	233.662	273.293	186.64	217.603	1577.86	284.131	463.203	394.001	-1.57719	0.00360264	0.0128479	-	Chromosome	2900174	2901529	+	1356	-	PF05198:Translation initiation factor IF-3, N-terminal domain|PF00707:Translation initiation factor IF-3, C-terminal domain|PF00453:Ribosomal protein L20|PF01632:Ribosomal protein L35	-	173	278	217	268	1367	272	534	372	32.1304	38.7884	26.8025	31.2606	220.656	41.3588	69.0828	58.2088
gene:GYO_2754	86.4416	117.968	57.6263	99.87	51.9413	42.8285	48.5755	54.0163	0.874987	0.00360356	0.0128479	-	Chromosome	2554449	2554622	-	174	protein_coding	- && -	-	64	120	67	123	45	41	56	51	92.6318	130.481	64.4912	111.809	56.607	48.584	56.4582	62.1908
gene:GYO_1208	125.61	204.478	150.516	129.912	98.1114	83.5679	98.8859	94.2637	0.704983	0.00363803	0.0129508	-	Chromosome	1105729	1106637	-	909	protein_coding	- && PF00849:RNA pseudouridylate synthase	-	93	208	175	160	85	80	114	89	25.7661	43.2928	32.244	27.8406	20.4674	18.1462	22.0003	20.7745
gene:GYO_3013	101.299	152.375	111.812	100.682	83.1061	72.0773	65.0565	49.7797	0.790547	0.00363853	0.0129508	-	Chromosome	2780718	2780918	-	201	protein_coding	- && PF11146:Protein of unknown function (DUF2905)	-	75	155	130	124	72	69	75	47	93.9712	145.899	108.323	97.577	78.405	70.7802	65.4566	49.6143
gene:GYO_2360	124.26	143.528	105.792	77.9473	47.3243	62.6759	79.8027	52.9572	0.886372	0.00365105	0.0129846	-	Chromosome	2229368	2229970	-	603	protein_coding	- && PF12695:Alpha/beta hydrolase family	-	92	146	123	96	41	60	92	50	38.4238	45.8091	34.1635	25.1812	14.8824	20.516	26.7645	17.5937
gene:GYO_3891	24.3117	38.3396	22.3624	29.2302	50.7871	49.0961	51.1778	52.9572	-0.833147	0.00365722	0.0129957	comFA	Chromosome	3601481	3602866	-	1386	protein_coding	- && PF00271:Helicase conserved C-terminal domain|PF04851:Type III restriction enzyme, res subunit	Helicase_C	18	39	26	36	44	47	59	50	3.27068	5.32375	3.14185	4.10829	6.94859	6.99187	7.46753	7.65442
gene:GYO_4080	163.429	186.783	215.884	223.287	81.9518	71.0327	145.727	129.215	0.882162	0.00366959	0.0130287	-	Chromosome	3786263	3787219	-	957	protein_coding	- && PF03547:Membrane transport protein	-	121	190	251	275	71	68	168	122	31.8422	37.5628	43.9275	45.4509	16.2388	14.6506	30.7954	27.0491
gene:GYO_0560	81.039	70.7808	57.6263	51.9649	25.3935	33.4271	46.8407	32.8334	0.897924	0.00373981	0.013267	-	Chromosome	491660	492022	+	363	protein_coding	- && PF01638:HxlR-like helix-turn-helix	DUF24	60	72	67	64	22	32	54	31	41.6269	37.5269	30.9131	27.8866	13.2655	18.1762	26.0961	18.1201
gene:GYO_0118	4462.55	5264.32	5307.64	4771.03	3025.29	4059.31	3543.41	3779.02	0.45919	0.00375217	0.0132997	gltX	Chromosome	111124	112575	+	1452	protein_coding	- && PF00749:tRNA synthetases class I (E and Q), catalytic domain	-	3304	5355	6171	5876	2621	3886	4085	3568	573.064	697.765	711.81	640.084	395.101	551.817	493.53	521.391
gene:GYO_3135	160.727	362.752	120.413	209.483	85.4146	101.326	111.03	101.678	1.09467	0.00375639	0.0133036	-	Chromosome	2899850	2900119	-	270	protein_coding	- && PF06961:Protein of unknown function (DUF1294)	DUF1294	119	369	140	258	74	97	128	96	110.997	258.571	86.8439	151.139	59.9895	74.0742	83.1638	75.4419
gene:GYO_3048	9.45455	4.91533	8.60094	8.11951	24.2393	22.9812	14.7461	15.8871	-1.32515	0.00378066	0.0133732	spoIIB	Chromosome	2808638	2809636	-	999	protein_coding	- && PF05036:Sporulation related domain	-	7	5	10	10	21	22	17	15	1.76466	0.946937	1.67652	1.58327	4.60109	4.54063	2.98519	3.18589
gene:GYO_3166	20529.9	18430.5	13614.4	12389.6	22166.2	29499.5	24869.8	27372.5	-0.677654	0.00378232	0.0133732	-	Chromosome	2929285	2930403	-	1119	protein_coding	- && PF00285:Citrate synthase	Citrate_synt	15200	18748	15829	15259	19204	28240	28671	25844	3420.92	3169.87	2369.18	2156.84	3756.37	5203.48	4494.7	4900.44
gene:GYO_3773	1930.08	742.215	1300.46	1109.13	1919.52	2938.45	2447.86	2520.76	-0.951932	0.00381421	0.0134748	-	Chromosome	3489931	3491400	+	1470	protein_coding	- && PF00135:Carboxylesterase family	COesterase	1429	755	1512	1366	1663	2813	2822	2380	244.819	97.1731	172.27	146.979	247.618	394.558	336.766	343.53
gene:GYO_1199	66.1818	187.766	43.0047	58.4605	30.0105	43.8731	11.2765	23.3012	1.71629	0.00383005	0.0135098	-	Chromosome	1095006	1095836	+	831	protein_coding	- && PF03180:NLPA lipoprotein	-	49	191	50	72	26	42	13	22	14.8499	43.4859	10.0773	13.7042	6.84825	10.4209	2.74429	5.61729
gene:GYO_2763	31.0649	59.9671	42.1446	43.0334	23.085	9.40138	26.89	18.0054	1.18689	0.00383048	0.0135098	pstC	Chromosome	2560648	2561577	-	930	protein_coding	- && PF00528:Binding-protein-dependent transport system inner membrane component	BPD_transp_1	23	61	49	53	20	9	31	17	6.22837	12.4098	8.82446	9.01394	4.70711	1.99535	5.84746	3.87857
gene:GYO_3205	272.831	445.329	350.918	274.44	207.765	231.901	196.037	209.71	0.669527	0.00385343	0.0135795	-	Chromosome	2963914	2965059	-	1146	protein_coding	- && PF00266:Aminotransferase class-V	Aminotran_5	202	453	408	338	180	222	226	198	44.3911	74.7877	59.628	46.6502	34.3791	39.9418	34.5949	36.6594
gene:GYO_1959	283.636	360.786	227.065	305.294	425.919	423.062	475.346	424.716	-0.572429	0.00386454	0.0136074	-	Chromosome	1782458	1783564	+	1107	protein_coding	- && -	-	210	367	264	376	369	405	548	401	47.775	62.7242	39.9421	53.7232	72.9602	75.4339	86.8403	76.8603
gene:GYO_3562	632.104	432.549	282.971	253.329	245.856	198.474	150.931	186.409	1.033	0.00387197	0.0136223	-	Chromosome	3299378	3299611	-	234	protein_coding	- && PF01541:GIY-YIG catalytic domain	GIY-YIG	468	440	329	312	213	190	174	176	503.685	355.757	235.481	210.892	199.237	167.416	130.443	159.589
gene:GYO_0959	4.05195	0.983067	7.74084	1.6239	36.936	29.2488	6.07194	8.47315	-2.48	0.00390431	0.0137247	-	Chromosome	876875	877765	+	891	protein_coding	- && PF00528:Binding-protein-dependent transport system inner membrane component	BPD_transp_1	3	1	9	2	32	28	7	8	0.847955	0.212343	1.69176	0.355037	7.86103	6.47947	1.37819	1.9051
gene:GYO_2529	873.87	962.422	1154.25	898.018	333.579	657.052	573.365	676.793	0.79507	0.00391724	0.0137588	mecB	Chromosome	2370075	2370659	-	585	protein_coding	- && PF05389:Negative regulator of genetic competence (MecA)	-	647	979	1342	1106	289	629	661	639	278.534	316.624	384.213	299.034	108.131	221.694	198.214	231.766
gene:GYO_0953	325.507	406.007	294.152	336.148	249.318	226.678	234.204	253.135	0.499766	0.00392836	0.0137865	-	Chromosome	870337	870879	+	543	protein_coding	- && PF00583:Acetyltransferase (GNAT) family	Acetyltransf_1	241	413	342	414	216	217	270	239	111.775	143.902	105.488	120.593	87.0685	82.3984	87.2272	93.3906
gene:GYO_4382	240.416	160.24	104.931	144.527	370.515	368.743	216.855	296.56	-0.950388	0.00393987	0.0138155	-	Chromosome	4074696	4075511	-	816	protein_coding	- && PF04962:KduI/IolB family	-	178	163	122	178	321	353	250	280	54.9363	37.7932	25.0406	34.5026	86.1038	89.1956	53.745	72.807
gene:GYO_2113	588.883	321.463	337.157	300.422	245.856	240.258	191.7	180.054	0.849386	0.00396585	0.0138952	-	Chromosome	1990871	1992025	-	1155	protein_coding	- && PF13412:Winged helix-turn-helix DNA-binding|PF00480:ROK family	ROK	436	327	392	370	213	230	221	170	95.0679	53.5651	56.8433	50.6689	40.365	41.0587	33.5659	31.23
gene:GYO_1800	48362.7	49931.9	40449.3	59222.9	38950.2	35580.1	29485.4	31181.2	0.550214	0.0039732	0.0139095	-	Chromosome	1635247	1636659	+	1413	protein_coding	- && PF07992:Pyridine nucleotide-disulphide oxidoreductase|PF02852:Pyridine nucleotide-disulphide oxidoreductase, dimerisation domain	Pyr_redox_2	35807	50792	47029	72939	33745	34061	33992	29440	6381.98	6800.95	5574.41	8164.68	5227.26	4970.2	4220.1	4420.8
Novel00220	4.05195	1.96613	0	0.811951	84.2603	9.40138	3.46968	1.05914	-3.91686	0.00398055	0.0139238	-	Chromosome	1571797	1571990	-	194	-	PF00015:Methyl-accepting chemotaxis protein (MCP) signalling domain	-	3	2	0	1	73	9	4	1	3.89447	1.95049	0	0.815305	82.3623	9.56533	3.61698	1.09371
gene:GYO_4285	4576	1644.67	1936.07	1493.99	3102.63	10547.3	5371.93	7015.76	-1.43216	0.00399259	0.0139488	-	Chromosome	3974172	3975269	-	1098	protein_coding	- && PF00005:ABC transporter|PF03459:TOBE domain|PF07673:Protein of unknown function (DUF1602)	ABC_tran	3388	1673	2251	1840	2688	10097	6193	6624	777.088	288.277	343.359	265.056	535.839	1896.05	989.434	1280.04
gene:GYO_1779	5992.83	7111.51	5498.58	5382.43	4827.08	4359.11	4187.04	3751.49	0.486062	0.00399426	0.0139488	-	Chromosome	1615754	1617373	+	1620	protein_coding	- && PF00005:ABC transporter|PF12848:ABC transporter	ABC_tran	4437	7234	6393	6629	4182	4173	4827	3542	689.769	844.851	660.944	647.224	565.036	531.12	522.698	463.915
gene:GYO_2446	740.156	638.993	483.373	390.549	408.605	292.488	281.044	316.684	0.793834	0.00400487	0.0139744	-	Chromosome	2299643	2299771	-	129	protein_coding	- && -	-	548	650	562	481	354	280	324	299	1069.84	953.323	729.662	589.762	600.649	447.535	440.599	491.798
gene:GYO_0564	118.857	75.6961	124.714	129.1	285.1	224.589	143.992	180.054	-0.892478	0.00404837	0.0141146	-	Chromosome	514158	517985	+	3828	protein_coding	- && PF00975:Thioesterase domain|PF00501:AMP-binding enzyme|PF00668:Condensation domain|PF00550:Phosphopantetheine attachment site|PF13193:AMP-binding enzyme C-terminal domain	AMP-binding	88	77	145	159	247	215	166	170	5.78949	3.80571	6.34412	6.56972	14.1232	11.5805	7.60719	9.42285
Novel00168	18.9091	26.5428	22.3624	25.1705	185.834	51.1853	51.1778	25.4194	-1.74805	0.0040776	0.0142044	-	Chromosome	1209619	1210817	+	1199	-	PF00375:Sodium:dicarboxylate symporter family	SDF	14	27	26	31	161	49	59	24	2.94062	4.26051	3.63186	4.08944	29.391	8.42628	8.63219	4.24715
Novel00653	5.4026	4.91533	2.58028	6.49561	32.319	13.5798	11.2765	10.5914	-1.7999	0.0040808	0.0142044	-	Chromosome	4073244	4073415	+	172	-	PF02776:Thiamine pyrophosphate enzyme, N-terminal TPP binding domain	TPP_enzyme_N	4	5	3	8	28	13	13	10	5.85681	5.49994	2.92124	7.3567	35.6317	15.5838	13.2588	12.3361
gene:GYO_3871	4458.5	3799.55	4095.77	3786.94	2802.52	2608.36	2803.5	3508.94	0.461184	0.00408701	0.0142144	prfB	Chromosome	3586526	3587509	-	984	protein_coding	- && PF03462:PCRF domain|PF00472:RF-1 domain	-	3301	3865	4762	4664	2428	2497	3232	3313	844.85	743.14	810.53	749.696	540.083	523.218	576.188	714.384
gene:GYO_1625	83.7403	49.1533	317.375	82.0071	50.7871	37.6055	29.4923	45.5432	1.70745	0.00409296	0.0142234	-	Chromosome	1481405	1482136	+	732	protein_coding	- && PF04239:Protein of unknown function (DUF421)	-	62	50	369	101	44	36	34	43	21.3309	12.9234	84.4287	21.8239	13.1568	10.1403	8.14809	12.4641
gene:GYO_4443	1154.81	513.161	939.222	745.371	1312.38	1764.33	1601.26	1336.64	-0.84402	0.0041264	0.014328	rocD	Chromosome	4140094	4141299	-	1206	protein_coding	- && PF00202:Aminotransferase class-III	Aminotran_3	855	522	1092	918	1137	1689	1846	1262	178.545	81.8917	151.653	120.397	206.358	288.763	268.517	222.033
gene:GYO_4398	54.026	43.2549	39.5643	38.9737	31.1648	16.7136	24.2878	20.1237	0.923027	0.00414982	0.0143975	-	Chromosome	4092171	4093184	-	1014	protein_coding	- && PF07883:Cupin domain	Cupin_2	40	44	46	48	27	16	28	19	9.93462	8.20977	7.59792	7.4873	5.82818	3.25343	4.84405	3.97577
gene:GYO_0485	52.6753	8.8476	174.599	116.921	168.521	479.471	506.574	341.044	-2.08047	0.00415902	0.0144177	-	Chromosome	419682	420458	+	777	protein_coding	- && PF00106:short chain dehydrogenase	adh_short	39	9	203	144	146	459	584	322	12.6408	2.19148	43.7572	29.3132	41.1281	121.801	131.85	87.9306
gene:GYO_2368	1546.49	1896.34	1262.62	1423.35	1138.09	987.145	960.234	1124.81	0.541683	0.00423401	0.0146657	deoD	Chromosome	2236393	2237094	-	702	protein_coding	- && PF01048:Phosphorylase superfamily	-	1145	1929	1468	1753	986	945	1107	1062	410.769	519.89	350.239	394.972	307.431	277.558	276.63	320.991
gene:GYO_0360	56.7273	48.1703	63.6469	107.178	95.8029	161.913	137.052	147.221	-0.96901	0.00427057	0.0147803	-	Chromosome	304537	305904	-	1368	protein_coding	- && PF00367:phosphotransferase system, EIIB|PF02378:Phosphotransferase system, EIIC	-	42	49	74	132	83	155	158	139	7.73201	6.77683	9.05984	15.2619	13.28	23.3617	20.2609	21.5593
gene:GYO_1318	355.221	165.155	370.7	373.498	511.333	657.052	533.464	621.717	-0.877577	0.0042769	0.0147902	-	Chromosome	1208115	1209155	+	1041	protein_coding	- && PF05343:M42 glutamyl aminopeptidase	-	263	168	431	460	443	629	615	587	63.626	30.5334	69.3428	69.8922	93.1451	124.583	103.636	119.644
gene:GYO_3004	90.4935	96.3405	81.7089	61.7083	55.4041	48.0515	43.371	51.898	0.730783	0.00431437	0.0149065	-	Chromosome	2772004	2772501	-	498	protein_coding	- && PF02080:TrkA-C domain	TrkA_C	67	98	95	76	48	46	50	49	33.8825	37.2317	31.9499	24.1383	21.0969	19.0453	17.6128	20.8772
gene:GYO_4124	4.05195	254.614	343.177	189.997	15.0053	2719.09	2284.79	2895.7	-3.32063	0.00431752	0.0149065	-	Chromosome	3830450	3831805	-	1356	protein_coding	- && -	-	3	259	399	234	13	2603	2634	2734	0.557174	36.1374	49.282	27.2947	2.09841	395.798	340.757	427.803
gene:GYO_2086	21.6104	25.5597	17.2019	17.8629	11.5425	10.446	6.93936	5.29572	1.27016	0.00438088	0.0151125	-	Chromosome	1968161	1968613	+	453	protein_coding	- && PF02566:OsmC-like protein	-	16	26	20	22	10	10	8	5	8.89511	10.859	7.39447	7.6815	4.8318	4.55157	3.09799	2.34195
sRNA00023	2.7013	6.88147	4.30047	4.05976	49.6328	8.35679	13.8787	9.53229	-2.16042	0.00438602	0.0151125	-	Chromosome	1226020	1226110	+	91	-	-	-	2	7	5	5	43	8	16	9	5.535	14.5537	9.20245	8.69061	103.427	18.1262	30.8437	20.9849
gene:GYO_2409	1087.27	932.93	742.261	701.526	408.605	549.459	554.282	639.723	0.685282	0.0043902	0.0151125	-	Chromosome	2266759	2267193	-	435	protein_coding	- && PF06491:Disulphide isomerase	-	805	949	863	864	354	526	639	604	466.054	412.756	332.274	314.157	178.123	249.319	257.691	294.614
gene:GYO_2459	709.091	663.57	513.476	540.76	460.546	399.037	404.218	437.426	0.511106	0.00439138	0.0151125	-	Chromosome	2310806	2311300	-	495	protein_coding	- && -	-	525	675	597	666	399	382	466	413	267.106	257.997	201.997	212.809	176.431	159.117	165.146	177.031
gene:GYO_1409	744.208	771.707	415.425	526.144	355.509	378.145	389.472	225.598	0.864322	0.0044132	0.0151745	-	Chromosome	1296327	1297175	+	849	protein_coding	- && PF13509:S1 domain	-	551	785	483	648	308	362	449	213	163.446	174.936	95.2828	120.723	79.4054	87.9144	92.7741	53.2325
gene:GYO_4557	1.35065	3.93227	19.7822	9.74342	0	0	1.73484	0	4.15222	0.00441654	0.0151745	sspP	Chromosome	2029395	2029541	-	147	protein_coding	- && PF08179:Small acid-soluble spore protein P family	SspP	1	4	23	12	0	0	2	0	1.71322	5.14824	26.2051	12.9118	0	0	2.38672	0
gene:GYO_1218	8529.35	3501.68	12322.6	7849.95	2032.64	3875.46	4583.45	3436.92	1.20913	0.00442851	0.0152034	-	Chromosome	1115834	1117498	+	1665	protein_coding	- && PF16901:C-terminal domain of alpha-glycerophosphate oxidase|PF01266:FAD dependent oxidoreductase	DAO	6315	3562	14327	9668	1761	3710	5284	3245	955.187	404.759	1441.17	918.426	231.501	459.429	556.72	413.529
gene:GYO_4525	0	0	0	0	5.77126	2.0892	2.60226	3.17743	-4.23003	0.00448101	0.0153712	-	Chromosome	32316	35241	+	2926	protein_coding	- && -	-	0	0	0	0	5	2	3	3	0	0	0	0	0.374027	0.140934	0.17986	0.217547
gene:GYO_1545	8.1039	13.7629	12.9014	4.87171	32.319	22.9812	27.7575	16.9463	-1.33401	0.00450775	0.0154505	-	Chromosome	1412518	1413786	+	1269	protein_coding	- && PF07690:Major Facilitator Superfamily	MFS_1	6	14	15	6	28	22	32	16	1.19075	2.08729	1.97972	0.747845	4.82952	3.57454	4.42361	2.67525
gene:GYO_1654	691.533	1064.66	693.236	840.37	668.311	406.349	460.6	436.367	0.739445	0.00454081	0.0155513	mgtE	Chromosome	1504614	1505969	+	1356	protein_coding	- && PF01769:Divalent cation transporter|PF00571:CBS domain|PF03448:MgtE intracellular N domain	CBS	512	1083	806	1035	579	389	531	412	95.0911	151.107	99.5521	120.726	93.4601	59.1492	68.6947	64.4678
gene:GYO_3477	1689.66	1207.21	2254.31	2500.81	4083.74	2824.59	2898.05	3889.17	-0.839477	0.00455133	0.0155748	-	Chromosome	3208692	3211937	-	3246	protein_coding	- && -	-	1251	1228	2621	3080	3538	2704	3341	3672	97.0595	71.5758	135.236	150.08	238.57	171.758	180.558	240.027
gene:GYO_2445	108.052	196.613	133.315	102.306	78.4891	79.3895	79.8027	70.9626	0.808427	0.00456023	0.0155927	-	Chromosome	2298701	2299246	-	546	protein_coding	- && PF06908:Protein of unknown function (DUF1273)	-	80	200	155	126	68	76	92	67	36.9	69.3033	47.546	36.5006	27.2599	28.6999	29.5586	26.0368
Novel00256	1.35065	0	0	0	10.3883	2.0892	2.60226	4.23657	-4.00518	0.00460887	0.0157464	-	Chromosome	1721914	1722033	-	120	-	-	-	1	0	0	0	9	2	3	4	2.09869	0	0	0	16.416	3.43643	4.38559	7.07268
[truncated: 337 more rows]

## Sheet: Sg6-5h v.s. Cont-5h
gene_id	OD_02_Sg62	OD_02_Sg63	OD_02_Sg61	OD_02_Sg64	OD_02_Cont1	OD_02_Cont2	OD_02_Cont3	OD_02_Cont4	log2FoldChange	pvalue	padj	gene_name	gene_chr	gene_start	gene_end	gene_strand	gene_length	gene_biotype	gene_description	tf_family	OD_02_Sg62_readcount	OD_02_Sg63_readcount	OD_02_Sg61_readcount	OD_02_Sg64_readcount	OD_02_Cont1_readcount	OD_02_Cont2_readcount	OD_02_Cont3_readcount	OD_02_Cont4_readcount	OD_02_Sg62_fpkm	OD_02_Sg63_fpkm	OD_02_Sg61_fpkm	OD_02_Sg64_fpkm	OD_02_Cont1_fpkm	OD_02_Cont2_fpkm	OD_02_Cont3_fpkm	OD_02_Cont4_fpkm
[truncated: 2,019 more rows]

[truncated: 2 more sheets: Sg3a-1h v.s. Cont-1h, Sg6-1h v.s. Cont-1h]
