# Supplementary material for: Disparate Effects of Two Clerodane Diterpenes of Giant Goldenrod (Solidago gigantea Ait.) on Bacillus spizizenii
Source: Int J Mol Sci. 2024 Jan 26;25(3):1531. doi: 10.3390/ijms25031531 (PMC10855248; doi:10.3390/ijms25031531)
Supplement: Supplementary file 1 [file ijms-25-01531-s001.zip › Table S4.xlsx]

## Sheet: Sheet1
	Table S4. Comparison of effect of diterpene treatments on transcriptome with changes induced under different environmental and nutritional conditions (GO enrichment results with up-and down-regulated processes)
	clusters (1-10.)were originated from:Huang, Y.; Smith, W.; Harwood, C.; Wipat, A.; Bacardit, J. Computational strategies for the identification of a transcriptional biomarker panel to sense cellular growth states in Bacillus subtilis. Sensors 2021, 21, 2436, doi:10.3390/s21072436.
			Sg3a-5h	Sg6-5h	Sg3a-1h	Sg6-1h	1. Sporulation early stage, competence 90min, LB/LBG in transition/stationary phase, individual/confluent colonies swarming cells in LB agar, Mitomycin 40 mins (M40t45_2, M40t45_1)	2. From glucose to malate 5min-150min, competence 30min, Malic acid+Glucose	3. Anaerobic; M9 in transition phase; Glycerol, Malic acid,Pyruvate,; Gluconate (Glucon_1, Glucon_2); Glutamic acid+Succinic acid(G+S_2, G+S_3); Fructose (Fru_2, Fru_3), From glucose to malate 150mins (GM+150_2)	4. from malate to glucose 5min-l150min	5. low-phosphate medium, 51 degree in SMM, Nacl in SMM (HiSO), Biofilm, Fructose (Fru_1), Gluconate (Glucon_3), Glutamic acid+Succinic acid (G+S_1) From glucose to malate 5min (GM+5_2)	6. starvation, M9 in stationary phase, low-phosphate in stationary phase	7. oxidative	8. Mitomycin 90min, 16 degree in BMM, 18 degree in SMM	9. Ethanol, 48 degree in BMM, Nacl in SMM (salt)	10. germination
	GO:0007154	cell communication	down				up								down
	GO:0019538	protein metabolic process		down			down					down
	GO:0044267	cellular protein metabolic process		down			down					down
	GO:0006412	translation		down			down					down
	GO:0009165	nucleotide biosynthetic process		down			down					down
	GO:1901293	nucleoside phosphate biosynthetic process		down			down					down
	GO:0009116	nucleoside metabolic process		down			down					down
	GO:0009124	nucleoside monophosphate biosynthetic process		down			down					down
	GO:0046390	ribose phosphate biosynthetic process		down			down					down
	GO:0017144	drug metabolic process		down			up			up				down		down
	GO:0003723	RNA binding		down			down					down
	GO:0005622	intracellular		down			down					down				up
	GO:0005737	cytoplasm		down			down					down
	GO:0044444	cytoplasmic part		down			down					down
	GO:0043229	intracellular organelle		down			down					down
	GO:0043232	intracellular non-membrane-bounded organelle		down			down					down
	GO:0005840	ribosome		down			down					down
	GO:0006810	transport	up/down		down	down		down		down					up/down
	GO:0005975	carbohydrate metabolic process	down					down	down	down	down					down
	GO:0016798	hydrolase activity, acting on glycosyl bonds	down	up				down		down
	GO:0004553	hydrolase activity, hydrolyzing O-glycosyl compounds	down	up				down		down		up
	GO:0015144	carbohydrate transmembrane transporter activity		up				down		down
	GO:0008982	protein-N(PI)-phosphohistidine-sugar phosphotransferase activity		up				down		down
	GO:0071702	organic substance transport			down			down		down
	GO:0008514	organic anion transmembrane transporter activity			down	down		up
	GO:0055085	transmembrane transport				down		down		down
	GO:0046906	tetrapyrrole binding	down						up
	GO:0020037	heme binding	down						up
	GO:0090407	organophosphate biosynthetic process	down						down			down				down
	GO:0035639	purine ribonucleoside triphosphate binding	down	down					down			down				up
	GO:0017076	purine nucleotide binding	down	down					down			down				up
	GO:0032555	purine ribonucleotide binding	down	down					down			down				up
	GO:0001882	nucleoside binding	down	down					down			down				up
	GO:0032549	ribonucleoside binding	down	down					down			down				up
	GO:0001883	purine nucleoside binding	down	down					down			down				up
	GO:0032550	purine ribonucleoside binding	down	down					down			down				up
	GO:0032561	guanyl ribonucleotide binding	down						down
	GO:0005525	GTP binding	down						down
	GO:0055114	oxidation-reduction process			up	up			down				up		up	up/down
	GO:0022804	active transmembrane transporter activity	up/down							down
	GO:0015293	symporter activity	up/down							down
	GO:0006518	peptide metabolic process		down						up
	GO:0043043	peptide biosynthetic process		down						up
	GO:0006796	phosphate-containing compound metabolic process		down						down
	GO:0009144	purine nucleoside triphosphate metabolic process		down						down			down
	GO:0009205	purine ribonucleoside triphosphate metabolic process		down						down			down
	GO:0072522	purine-containing compound biosynthetic process		down						down		down
	GO:0009141	nucleoside triphosphate metabolic process		down						down			down
	GO:0009199	ribonucleoside triphosphate metabolic process		down						down			down
	GO:0009142	nucleoside triphosphate biosynthetic process		down						down			down
	GO:0009145	purine nucleoside triphosphate biosynthetic process		down						down			down
	GO:0009201	ribonucleoside triphosphate biosynthetic process		down						down			down
	GO:0009206	purine ribonucleoside triphosphate biosynthetic process		down						down			down
	GO:0009152	purine ribonucleotide biosynthetic process		down						down		down
	GO:0046034	ATP metabolic process		down						down			down
	GO:0006754	ATP biosynthetic process		down						down			down
	GO:0044281	small molecule metabolic process		down						down		down			up/down
	GO:0098660	inorganic ion transmembrane transport		down						down			down
	GO:0098662	inorganic cation transmembrane transport		down						down			down
	GO:1902600	proton transmembrane transport		down						down			down
	GO:0015077	monovalent inorganic cation transmembrane transporter activity		down	up/down					down			down
	GO:0015078	proton transmembrane transporter activity		down						down			down
	GO:0015075	ion transmembrane transporter activity			up/down	up/down				down			down			up
	GO:0008324	cation transmembrane transporter activity			up/down					down
	GO:0043038	amino acid activation		down								down				up
	GO:0043039	tRNA aminoacylation		down								down				up
	GO:0006418	tRNA aminoacylation for protein translation		down								down				up
	GO:1901564	organonitrogen compound metabolic process		down								up/down			up/down
	GO:1901566	organonitrogen compound biosynthetic process		down								up/down			up/down
	GO:0055086	nucleobase-containing small molecule metabolic process		down								down
	GO:0019637	organophosphate metabolic process		down								down
	GO:0006753	nucleoside phosphate metabolic process		down								down
	GO:0009117	nucleotide metabolic process		down								down
	GO:0072521	purine-containing compound metabolic process		down								down
	GO:0006163	purine nucleotide metabolic process		down								down	down
	GO:0009123	nucleoside monophosphate metabolic process		down								down
	GO:0009150	purine ribonucleotide metabolic process		down								down	down
	GO:0009126	purine nucleoside monophosphate metabolic process		down								down	down
	GO:0009167	purine ribonucleoside monophosphate metabolic process		down								down	down
	GO:0006164	purine nucleotide biosynthetic process		down								down
	GO:0009127	purine nucleoside monophosphate biosynthetic process		down								down
	GO:0019693	ribose phosphate metabolic process		down								down
	GO:0009259	ribonucleotide metabolic process		down								down
	GO:0009161	ribonucleoside monophosphate metabolic process		down								down
	GO:0009156	ribonucleoside monophosphate biosynthetic process		down								down
	GO:0009168	purine ribonucleoside monophosphate biosynthetic process		down								down
	GO:0009260	ribonucleotide biosynthetic process		down								down
	GO:1901135	carbohydrate derivative metabolic process		down								up/down	down
	GO:1901137	carbohydrate derivative biosynthetic process		down								down	down			up
	GO:1901657	glycosyl compound metabolic process		down								down
	GO:0016875	ligase activity, forming carbon-oxygen bonds		down								down				up
	GO:0004812	aminoacyl-tRNA ligase activity		down								down				up
	GO:0044424	intracellular part		down								down
	GO:0048870	cell motility		down									down			down
	GO:0001539	cilium or flagellum-dependent cell motility		down									down			down
	GO:0097588	archaeal or bacterial-type flagellum-dependent cell motility		down									down			down
	GO:0071973	bacterial-type flagellum-dependent cell motility		down									down			down
	GO:0098655	cation transmembrane transport		down									down
	GO:0006928	movement of cell or subcellular component	down	down									down			down
	GO:0022890	inorganic cation transmembrane transporter activity		down									down
	GO:0050794	regulation of cellular process				down							up
	GO:0019222	regulation of metabolic process				down							up			up
	GO:0080090	regulation of primary metabolic process				down							up			up
	GO:0031323	regulation of cellular metabolic process				down							up			up
	GO:0051171	regulation of nitrogen compound metabolic process				down							up
	GO:0060255	regulation of macromolecule metabolic process				down							up			up
	GO:0019219	regulation of nucleobase-containing compound metabolic process				down							up
	GO:0031326	regulation of cellular biosynthetic process				down							up			up
	GO:0009889	regulation of biosynthetic process				down							up			up
	GO:0010556	regulation of macromolecule biosynthetic process				down							up			up
	GO:0051252	regulation of RNA metabolic process				down							up
	GO:2001141	regulation of RNA biosynthetic process				down							up
	GO:0006355	regulation of transcription, DNA-templated				down							up
	GO:1903506	regulation of nucleic acid-templated transcription				down							up
	GO:2000112	regulation of cellular macromolecule biosynthetic process				down							up			up
	GO:0006935	chemotaxis	down	down	down										down	down
	GO:0042330	taxis	down	down	down										down	down
