# Supplementary figures and images for: Disparate Effects of Two Clerodane Diterpenes of Giant Goldenrod (Solidago gigantea Ait.) on Bacillus spizizenii
Source: MDPI journal article supplement (doi:10.3390/ijms25031531), 2024-01-26

## Sg3a-5h vs. control-5h

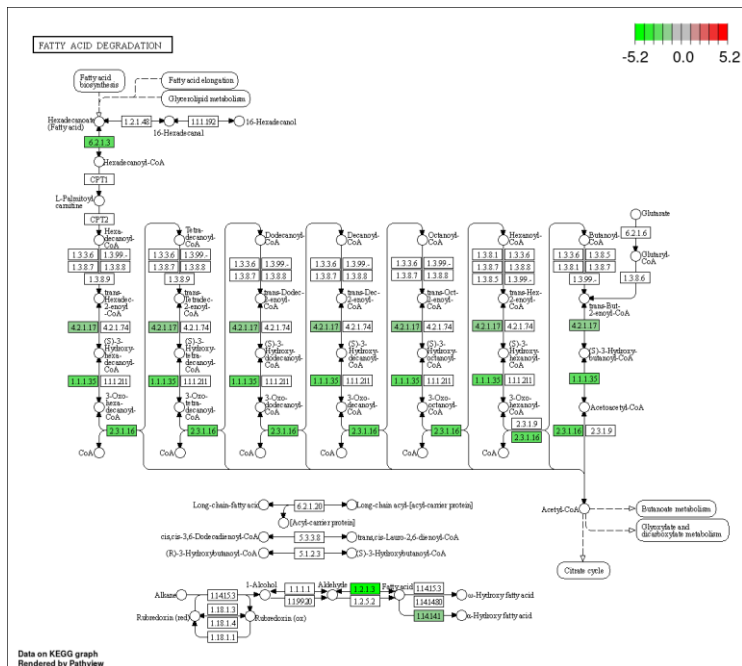

## Sg6-5h vs. control-5h

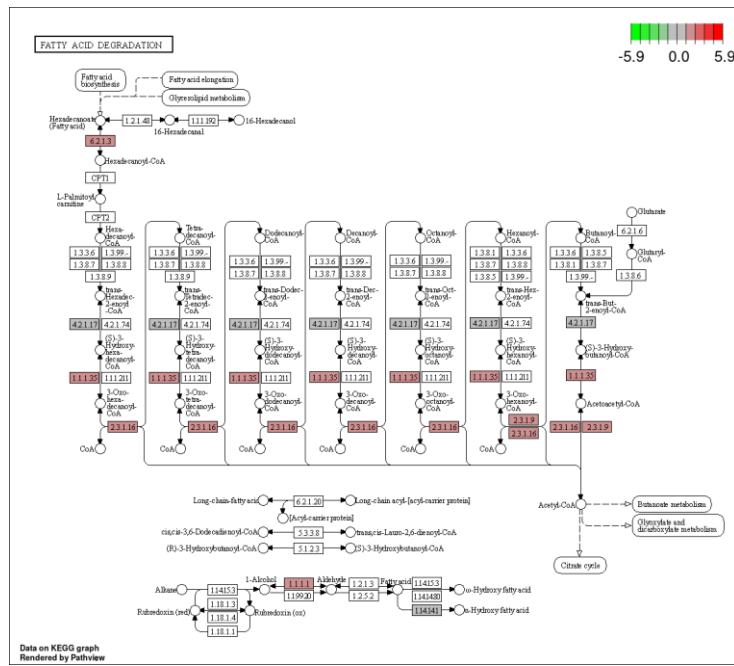

## Sg3a-1h vs. control-1h

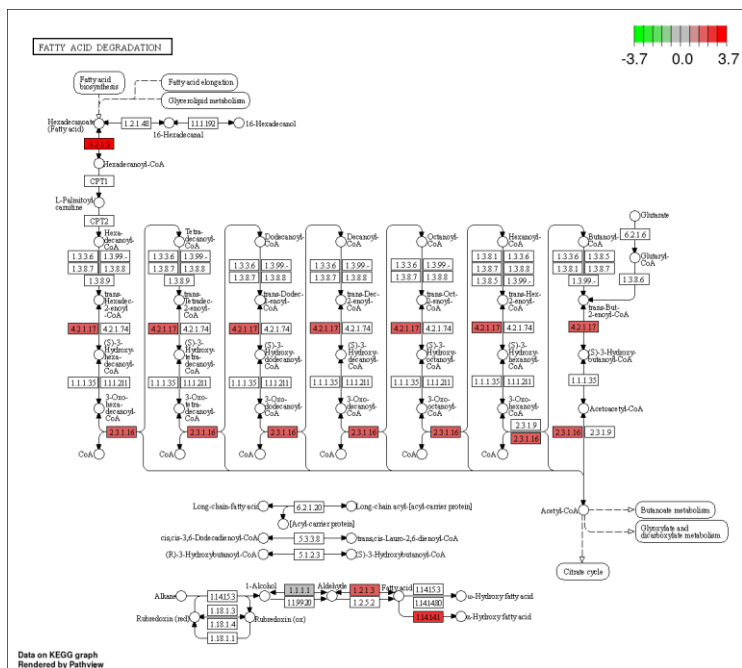

## Sg6-1h vs. control-1h

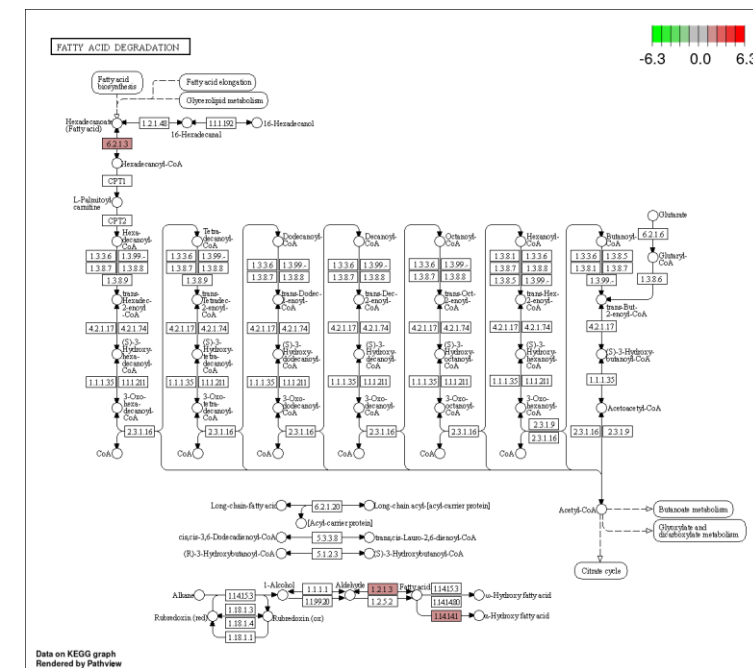

Supplement: s1 [file s1]
